# Supplementary material for: Serological markers to measure recent changes in malaria at population level in Cambodia
Source: Malar J. 2016 Nov 4;15:529. doi: 10.1186/s12936-016-1576-z (PMC5096337; doi:10.1186/s12936-016-1576-z)
Supplement: Supplementary file 1 — Additional file 1. Raw data file. This file contains all raw data used for all analyses in this study. [file 12936_2016_1576_MOESM1_ESM.csv]

Year.analyzed	Survey	Village	Cluster	Arm	Ethnicity	Ct_Value	Fever48	Temp	Rep_Y	Rep_LW	Net_LN	OP	OF	TN	Sex	Age	Qual_Result	Date_blood	Species	mono_mixed	repeated	random	Total.Events	CSP	STARP.R	SALSA2	SR11.1	LSA1.41	LSA1.J	LSA3.RE	Pf.MSP1.19	GLURP	Pf.GLURP.R2	PvVK210.CSP	PvVK247.CSP	PvCSP	PvAMA1	Pv.MSP1.19	PmCSP	SALIV.1	SALIV.2
2014	PT	3203	3203	NA	3	NA	1	36.5	NA	NA	NA	0	0	1	F	60	Negative	14/02/2012	NA	0	5	0	2842	1022	7617	498.25	3381	219	NA	16192	581	16675	17595.5	678.75	1359.5	873.75	887.25	604	4238.5	509.5	575.5
2014	PT	3203	3203	NA	3	NA	0	36.4	NA	NA	NA	0	0	1	M	29	Negative	14/02/2012	NA	0	5	0	2921	1998.5	304.5	1277	980.5	1834.25	225.25	9468.75	897.5	6107	7922.75	1188.5	808.5	1122.5	1220.25	620.25	1689	512.75	675.5
2014	PT	3203	3203	NA	3	NA	0	36.8	NA	NA	NA	0	0	1	F	20	Negative	14/02/2012	NA	0	5	0	3165	566	303.5	6815.5	652.75	1282.25	565.25	1837.5	462.25	1683.25	2439.5	152.5	108.75	336.75	572.5	321.75	389	313	362.75
2014	PT	3221	3221	NA	2	NA	1	36.7	NA	NA	NA	1	0	1	M	75	Negative	24/02/2012	NA	0	5	0	3000	522.25	264.75	564.5	670	725	139.5	308.5	488.5	726	3982.25	322.75	193.5	352.5	588.5	357	239.5	333.5	390.5
2014	PT	3248	3248	NA	3	NA	1	36.8	NA	NA	NA	1	0	1	F	30	Negative	7/02/2012	NA	0	5	0	2855	654.25	242.5	398	646.75	214.75	177.25	575.25	416	460.75	688.5	115.25	139.75	402.25	763	397.25	439.5	473.5	449
2014	PT	3317	3317	NA	2	NA	0	36.2	NA	NA	NA	0	0	1	F	55	Negative	2/02/2012	NA	0	5	0	2887	1122.75	440.5	900.75	733	4092.25	394.75	4882.75	471.75	6711.5	7467.75	10069.75	428.5	1646.5	979.75	412.25	826.5	439	452
2014	PT	3326	3326	NA	2	NA	1	36.9	NA	NA	NA	1	0	1	F	5	Negative	1/02/2012	NA	0	5	0	3058	1257.5	286.75	624.5	484.25	982.75	184	480.75	528.25	2059	4023.25	96.5	108.5	610	865	316.25	316.25	284	348
2014	PT	3366	3366	NA	4	43	1	36.9	NA	NA	NA	0	1	1	M	25	Positive	21/02/2012	Pv	1	5	0	2896	918	1101.5	2585	1645	716.75	411	16093.25	671	1453.5	6947.25	752.25	392.25	721.25	780.75	767	1265.5	477.5	584
2014	PT	3366	3366	NA	4	NA	1	37.1	NA	NA	NA	0	0	1	F	28	Negative	21/02/2012	NA	0	5	0	2767	180.5	1099.75	434.25	2129	1062.25	144.5	7451.75	452.25	3430.75	4122.5	93.5	125.75	340.25	1797	1203	604	367.5	330.5
2014	PT	3368	3368	NA	4	NA	1	37	NA	NA	NA	0	0	1	F	60	Negative	17/02/2012	NA	0	5	0	2739	1315	244	3403.25	598.25	502.5	140.5	1551	383	458.75	758.75	483.5	273.25	596	949	415.5	2437	359.25	429
2014	S1	3122	3122	Control	4	NA	0	36.3	NA	NA	NA	0	0	1	F	6	Negative	3/05/2012	NA	0	3	0	3075	23.75	31	33	39.5	33	33	123.5	34.5	23.5	26	28	31	60	64.25	42	34	81.5	37.75
2014	S1	3122	3122	Control	4	42.02	1	36.1	NA	NA	NA	1	0	1	F	30	Positive	3/05/2012	Pv	1	1	0	372	NA	NA	4705.5	1713	NA	NA	NA	1223.75	NA	NA	NA	NA	1306.5	2727.5	1235.75	996.75	1164.5	1533
2014	S1	3122	3122	Control	4	36.8	1	36.5	NA	NA	NA	1	0	3	F	4	Positive	3/05/2012	Pv	1	1	0	2762	149	192	250	590.75	131	166	155.25	342.75	173	190	126	122.5	428	685.5	392.25	540.75	588.25	665
2014	S1	3122	3122	Control	4	NA	1	36.8	NA	NA	NA	1	0	1	M	5	Negative	3/05/2012	NA	0	3	0	3200	19	25.75	20.5	25	20	22.5	21	22	20	21	24.5	24	26.5	36	30.75	21.75	28	26
2014	S1	3122	3122	Control	4	NA	0	36.3	NA	NA	NA	1	0	1	M	26	Negative	3/05/2012	NA	0	3	0	2996	42.5	155	98.5	79	1413.25	49.5	5296.5	52.5	1900	5475.5	48	40	253	151.75	58.5	48	59.25	48.5
2014	S1	3122	3122	Control	4	NA	1	36.5	NA	NA	NA	1	0	1	F	41	Negative	3/05/2012	NA	0	3	0	3156	107.5	37.5	158	355.25	132.75	39	8449.25	69	2494	3520.75	1734.75	754.5	NA	727.75	67.5	118.5	90.25	55
2014	S1	3122	3122	Control	4	NA	0	36.2	NA	NA	NA	1	0	1	F	2	Negative	3/05/2012	NA	0	3	0	3112	21.25	28.25	25.5	36.25	21	25.5	23.5	29	22.75	30	24.5	26	32.5	46.5	40	29.5	48.5	34.5
2014	S1	3130	3130	Control	7	26.49	1	37	NA	NA	NA	0	0	1	M	5	Positive	4/05/2012	Pf	1	1	0	2972	142.5	331.25	294.75	947.5	879.25	544	407	384.5	239	396.75	123.25	127.5	445	758.5	363.5	316.75	425.75	472
2014	S1	3131	3131	Control	7	NA	0	36.5	NA	NA	NA	0	0	1	F	60	Negative	3/05/2012	NA	0	3	0	2905	3312.5	380.5	82.5	621.5	8508.5	1209.75	8657.5	78.5	1080.5	2648	1057.5	511.5	551.75	1600.75	100.5	338.5	58.75	65.5
2014	S1	3131	3131	Control	7	NA	0	37	NA	NA	NA	1	0	1	M	50	Negative	3/05/2012	NA	0	3	0	3320	55.5	38	41	53	39	36.75	41.5	48	37.5	126	59	49.75	170.75	300.25	578	47.5	51	50
2014	S1	3131	3131	Control	7	31.42	1	37.5	NA	NA	NA	0	0	1	M	10	Positive	3/05/2012	Pv	1	1	0	3093	109	178.5	204.5	562	113.5	128	119	307	164	233.25	99.5	102.5	362	NA	332.5	NA	378.5	400
2014	S1	3131	3131	Control	7	NA	0	36	NA	NA	NA	0	0	1	F	7	Negative	3/05/2012	NA	0	3	0	3015	52.5	78.5	71.5	88	105	71.5	59	121.5	124	305.25	57	55	105	145.75	99	68	95	101
2014	S1	3132	3132	Intervention	7	NA	1	37	NA	NA	NA	1	0	1	M	22	Negative	4/05/2012	NA	0	3	0	3052	161.5	49	1222.25	150.5	89.25	60.5	6927.75	151	1206.5	1956.5	73.5	149	100	233.5	73.75	125.75	80	67.5
2014	S1	3132	3132	Intervention	7	NA	1	37.1	NA	NA	NA	1	0	1	M	6	Negative	4/05/2012	NA	0	3	0	3265	24.5	30.5	27.5	34.5	42.5	30.5	27	33	25.5	33	32.25	33.5	66.5	115.5	41.75	29	36.5	40
2014	S1	3132	3132	Intervention	7	NA	1	36.4	NA	NA	NA	0	0	1	M	2	Negative	4/05/2012	NA	0	3	0	3236	21.5	28	25.5	31.5	22	28.25	24	29	23	22.75	27	28	32.5	43	41.75	26.5	33.5	31.5
2014	S1	3132	3132	Intervention	7	NA	1	37.5	NA	NA	NA	1	0	1	F	25	Negative	4/05/2012	NA	0	3	0	3230	256.75	52	227.25	78.75	323	101.5	35.5	48	70	325	40	133.5	100	140.25	60.5	142.25	44.5	46.25
2014	S1	3138	3138	Control	3	NA	1	36.5	NA	NA	NA	0	0	1	M	11	Negative	7/05/2012	NA	0	3	0	3011	155	96	74.5	58.25	10947	1098.25	544.25	56	712.25	819.75	42.25	39.25	214.5	201.75	58.5	87.75	64.5	55.5
2014	S1	3138	3138	Control	3	NA	1	37.1	NA	NA	NA	0	0	1	M	4	Negative	7/05/2012	NA	0	3	0	3285	27.5	35.5	35.5	42.25	508.5	191	33.75	39.75	41	68.75	31.5	33.75	51	66	49	37	43.5	44.5
2014	S1	3138	3138	Control	3	NA	1	36	NA	NA	NA	0	0	1	F	2	Negative	7/05/2012	NA	0	3	0	3301	22.5	30.5	27	32.25	25	28	23.5	29	24	182	28.5	29	39	40.5	37	24.5	30.5	31.5
2014	S1	3138	3138	Control	3	NA	1	36	NA	NA	NA	0	0	1	F	2	Negative	7/05/2012	NA	0	4	0	3184	23	30.25	29	35	28.5	32	27	33.75	27.25	34	29	30.5	59.5	88.5	42.5	29.5	36.5	36.5
2014	S1	3141	3141	Control	4	31.38	1	36.9	NA	NA	NA	0	0	1	M	10	Positive	2/05/2012	Pf	1	1	0	3143	154.5	200.25	261	700.75	392.5	305.25	150.5	391.5	264	1727	109.25	116.5	476	1085	382.75	350.5	477.5	567.5
2014	S1	3145	3145	Control	4	44.77	1	36	NA	NA	NA	0	0	1	F	3	Positive	3/05/2012	Pv	1	1	0	2916	268.75	269.5	384.25	1002	216.5	215.5	173.75	597.5	NA	238.25	141	143.25	919.5	NA	598.5	NA	668.5	834.5
2014	S1	3145	3145	Control	4	38.59	0	35.9	NA	NA	NA	0	0	NA	F	15	Positive	3/05/2012	Pf	1	1	0	2614	953	9440.25	19883.25	5174	2338.25	563.5	15411	1829	6393.25	11002	289	295.5	1726.25	2858.25	1423.25	1428	1580.25	1926.25
2014	S1	3146	3146	Control	7	NA	1	37	NA	NA	NA	0	0	1	F	40	Negative	3/05/2012	NA	0	3	0	3325	609	33.5	1279	70.5	882	581	4318.5	100.25	373.5	688	368.5	37.75	96.25	128.5	53.5	49.5	37.25	41.5
2014	S1	3147	3147	Intervention	4	NA	1	37	NA	NA	NA	1	0	1	F	47	Negative	2/05/2012	NA	0	3	0	2763	362.5	37.5	907	333.5	2350	65	5200.5	92	2805.75	3014	69.5	118.5	82	61	55.5	2900	37	39.5
2014	S1	3147	3147	Intervention	4	NA	1	36.5	NA	NA	NA	1	1	1	F	38	Positive	2/05/2012	Pv	1	2	0	2925	941.5	280	429.5	1774.75	710.25	218	14308	712.5	4249	9651	1984.75	265.25	1503.75	1669.5	784	714.5	720	904.25
2014	S1	3147	3147	Intervention	4	NA	1	36.5	NA	NA	NA	1	0	1	M	3	Positive	2/05/2012	Pv	1	1	0	2964	154	399.25	1272.5	858.5	1374.25	764.5	429.5	NA	NA	423.25	113	117.5	NA	NA	1080	NA	569.5	689
2014	S1	3147	3147	Intervention	4	NA	1	36.6	NA	NA	NA	1	1	1	F	49	Negative	2/05/2012	NA	0	3	0	2657	404.75	64.75	737.5	1393	7710.5	137.5	20437	199.5	5983.5	12918	819	202.5	339	213.75	104.5	178.75	54.5	56
2014	S1	3147	3147	Intervention	4	NA	1	37	NA	NA	NA	0	0	1	M	2	Negative	2/05/2012	NA	0	3	0	3053	18	22	17.5	24.5	51.25	21	102.5	19.5	27	53	24.5	23.5	20	26.5	27.5	17	20	21.5
2014	S1	3147	3147	Intervention	4	NA	1	37	NA	NA	NA	1	0	1	F	50	Positive	2/05/2012	Pf	1	1	0	2614	318	435.75	1287.25	484.75	346.5	92.25	15484	228.5	2938.75	3859.5	557.75	161.75	710	663.25	178	160.5	191	214
2014	S1	3147	3147	Intervention	4	NA	1	36.5	NA	NA	NA	1	1	1	M	27	Negative	2/05/2012	NA	0	3	0	2752	409.5	74	132.75	1395	378.75	51.25	723.75	104.25	1194.5	5092.75	170	59	146.5	957.75	60	920.5	54.5	48
2014	S1	3147	3147	Intervention	4	NA	1	37	NA	NA	NA	1	1	1	M	25	Negative	2/05/2012	NA	0	3	0	2479	864	149.5	392.75	910.25	7596	419.5	14839.25	107.75	3256.25	5177.25	228.5	317	235.5	343.25	80.5	109.5	60.75	78.75
2014	S1	3149	3149	Intervention	4	NA	0	36.7	NA	NA	NA	0	0	1	M	42	Positive	2/05/2012	Pv	1	1	0	2871	969	NA	NA	NA	772.5	NA	1412	NA	2065.25	2543.75	705.75	293	NA	NA	NA	NA	844.5	1002.75
2014	S1	3150	3150	Intervention	4	NA	1	37	NA	NA	NA	1	0	2	F	6	Negative	3/05/2012	NA	0	3	0	3448	16.5	25	16	19.25	18.5	19.5	30.5	17.5	19	16.75	22.5	21.5	20.5	28	25.5	16.5	19.5	20.5
2014	S1	3150	3150	Intervention	4	NA	1	36.6	NA	NA	NA	1	0	1	F	40	Negative	3/05/2012	NA	0	3	0	3426	139	29	311	221.75	108	29.5	4274	35.5	178.25	434.25	260.25	48.5	153	87	42	133	34.5	41.5
2014	S1	3150	3150	Intervention	4	NA	1	36.5	NA	NA	NA	1	0	1	F	50	Negative	3/05/2012	NA	0	4	0	3493	154.5	28.5	58.5	34	1464	120	139	55	456.25	848.5	140.75	68.5	94.5	52	38.75	111.75	30	30
2014	S1	3154	3154	Control	4	NA	1	36.4	NA	NA	NA	1	0	1	F	9	Negative	2/05/2012	NA	0	3	0	3258	36	48	48.5	62.5	42.75	85.25	39.5	58.25	2466	133.25	68.75	68.25	78.5	88.75	71	67.75	76	64.5
2014	S1	3154	3154	Control	4	40.93	1	36.1	NA	NA	NA	0	0	1	M	2	Positive	2/05/2012	Pf	1	2	0	2950	92	116.5	130.5	352	65.25	78.5	319	191	86	93.75	67.5	69.5	153.5	329.25	200.25	145	218.75	213.5
2014	S1	3154	3154	Control	4	NA	1	36.5	NA	NA	NA	1	1	1	M	35	Negative	2/05/2012	NA	0	3	0	3089	23.5	27.5	105	26	68	24.5	595	22.75	54	100.5	27	25.75	31.5	33.75	28.5	40	24.5	24.5
2014	S1	3154	3154	Control	4	NA	0	36.2	NA	NA	NA	0	0	2	M	17	Positive	2/05/2012	Pv	1	1	0	2878	186.5	288.25	NA	872.5	190.25	220.25	NA	NA	NA	NA	194	203	NA	5019.5	711	NA	660.75	740.5
2014	S1	3154	3154	Control	4	NA	1	36.7	NA	NA	NA	0	0	1	F	5	Positive	2/05/2012	Pv	1	1	0	2860	NA	NA	NA	NA	NA	NA	317.5	NA	NA	598.25	185	176.5	NA	NA	NA	NA	825	916
2014	S1	3154	3154	Control	4	NA	1	37.1	NA	NA	NA	NA	NA	NA	F	12	Negative	2/05/2012	NA	0	3	0	2656	22	28	25	30	56.5	33.5	23.5	30.25	27.75	23	27.5	28.5	43.25	49	35.5	26.5	34.25	31.5
2014	S1	3154	3154	Control	4	NA	1	36.2	NA	NA	NA	1	1	1	M	28	Negative	2/05/2012	NA	0	3	0	2638	52	63.5	71.5	87	260.25	42.5	2842.5	63	62.5	1537.5	110.5	40.5	86.5	127.75	49.5	88.5	55	45
2014	S1	3154	3154	Control	4	NA	1	35.1	NA	NA	NA	1	0	1	F	22	Negative	2/05/2012	NA	0	3	0	2395	28	35.5	34.75	148.25	1090.5	37.75	245	54	316	438.5	33.75	34	68.5	82	49.5	35	39.75	40.25
2014	S1	3154	3154	Control	4	36.64	1	36.2	NA	NA	NA	1	0	1	F	40	Positive	2/05/2012	Pf	1	1	0	2846	491.75	1008.25	5203	1261.25	555	584.5	17138.25	785.25	12937.75	16383	183	145	NA	NA	746	NA	643	826.5
2014	S1	3154	3154	Control	4	42.6	1	36.7	NA	NA	NA	1	0	1	F	12	Positive	2/05/2012	Pv	1	2	0	2972	694.25	205	3439.25	853.25	11486.5	1313	2183.25	455.5	2153	3649.75	160	137.25	444.75	691.25	355.5	302.75	437.25	459
2014	S1	3154	3154	Control	4	NA	1	34.2	NA	NA	NA	0	0	1	M	2	Negative	2/05/2012	NA	0	3	0	2491	18.5	25.5	19	23.75	31	24	25	19.5	27.5	23.5	25	24	31.5	36.5	28	23	22.5	23.25
2014	S1	3154	3154	Control	4	43.8	0	36.3	NA	NA	NA	0	0	1	M	21	Positive	2/05/2012	Pv	1	1	0	2324	242.5	299.25	632	1125.5	NA	433	491.25	655.5	1230.5	NA	225.75	331.5	715.25	1314.5	654.5	683.25	730.5	896
2014	S1	3172	3172	Control	3	NA	1	36.5	NA	NA	NA	1	0	1	F	15	Negative	8/05/2012	NA	0	3	0	2522	54.75	41.5	136.75	50	100.5	41.5	160.5	49.5	36.5	204	43	45.5	83.5	85.25	55	236	49.5	54.5
2014	S1	3174	3174	Control	3	NA	0	36	NA	NA	NA	1	0	1	M	18	Negative	8/05/2012	NA	0	3	0	2237	262	39.5	63.5	65.25	34	37	67.75	46	546.5	865	40.25	38.25	101.25	90.25	54	110	106.25	54.25
2014	S1	3174	3174	Control	3	42.47	0	36.2	NA	NA	NA	1	0	2	F	20	Positive	8/05/2012	Pm	1	1	0	3101	111	147	364	485	292.5	150.25	693	289.25	193.25	432.5	90	86.25	262.75	1053	272.5	242	300	341.5
2014	S1	3174	3174	Control	3	NA	0	36.7	NA	NA	NA	1	0	1	F	8	Negative	8/05/2012	NA	0	4	0	3337	21	27.5	25.5	32.75	22.5	27	24	30	738.75	30	27.75	26.5	153.5	152	42.5	26.5	36	34
2014	S1	3174	3174	Control	3	NA	0	36.4	NA	NA	NA	0	0	1	F	4	Negative	8/05/2012	NA	0	3	0	2430	18.75	24.5	22	26.5	25.5	28	24.5	22.5	25.5	23	27.25	26.25	34	39.5	34.5	23	28.5	27.75
2014	S1	3174	3174	Control	3	NA	0	35.4	NA	NA	NA	1	0	1	F	21	Negative	8/05/2012	NA	0	3	0	2511	158.5	32	65.5	47.5	907	36.5	694.25	58.75	113	236	61	49	62	67	43.75	151.75	52.5	39.75
2014	S1	3174	3174	Control	3	NA	1	36.2	NA	NA	NA	1	0	1	M	38	Negative	8/05/2012	NA	0	3	0	3070	172	38	30.5	128.25	822	57	717.5	131.5	1631.25	1659.25	152	38.5	98.25	72	42	62.25	36.5	37.5
2014	S1	3175	3175	Control	4	NA	1	36.5	NA	NA	NA	0	0	1	F	55	Negative	7/05/2012	NA	0	3	0	2654	605	35.75	661.5	113.5	53.25	36.5	161	43.5	143	202.5	233.75	286	115.75	70.5	50.25	95	41	41.5
2014	S1	3177	3176	Intervention	3	NA	1	36.6	NA	NA	NA	1	0	1	F	30	Positive	NA	Pv	1	1	0	2788	529.5	525	NA	1435	4313.25	524.25	10388	NA	1276.5	1920	294	244.75	NA	NA	NA	NA	929.75	1118.25
2014	S1	3179	3179	Intervention	3	NA	1	36.6	NA	NA	NA	1	1	1	M	8	Negative	6/05/2012	NA	0	3	0	2180	38.5	53.5	46	872.25	4181.75	589.5	437	91	2432.25	3490.75	37.5	71	116.75	142	68.5	89	68.5	57.5
2014	S1	3179	3179	Intervention	3	NA	0	36.9	NA	NA	NA	0	0	1	M	5	Negative	6/05/2012	NA	0	3	0	2584	32.5	37.5	37	62	273.5	43	35.5	50	63.5	128.5	36.5	35	118.5	138	60	38.25	54.5	47.5
2014	S1	3181	3181	Intervention	7	NA	1	36.8	NA	NA	NA	1	0	1	F	29	Positive	4/05/2012	Pv	1	1	0	2820	1029.75	NA	1423	1861.5	1053.5	429.25	7218.5	NA	3137	6241	718.75	604.5	1571.5	NA	NA	1763.5	1064	1260.25
2014	S1	3181	3181	Intervention	7	32.4	1	36.8	NA	NA	NA	1	0	1	F	7	Positive	4/05/2012	Pv	1	1	0	3174	219.25	315.75	444.5	1077.5	176	218.25	518.75	684	490.5	NA	172	180	1573.25	1798.75	744	690.5	753.5	873.5
2014	S1	3181	3181	Intervention	7	42.84	1	36.1	NA	NA	NA	0	0	1	F	9	Positive	4/05/2012	Pv	1	1	0	3031	200.25	350.5	NA	1203.5	5085.5	453.5	576.5	NA	NA	NA	158	144.5	NA	NA	NA	NA	781.25	1021.5
2014	S1	3181	3181	Intervention	7	38.75	1	36.1	NA	NA	NA	1	0	1	F	7	Positive	4/05/2012	Pf	1	3	0	2125	263.75	62	33.5	78	789	51	114	45	234.5	624	39.5	37	58.75	231.75	55.75	39.5	45.5	49
2014	S1	3181	3181	Intervention	7	NA	1	36.3	NA	NA	NA	1	0	1	F	35	Negative	4/05/2012	NA	0	3	0	2707	2194.5	119.5	2862.5	574	164	73.5	7011	67.75	2911.5	4959.5	1699.25	339.25	744	342.25	77.25	5812	50	50.25
2014	S1	3181	3181	Intervention	7	42.77	1	36.9	NA	NA	NA	1	0	1	F	12	Positive	4/05/2012	PfPv	2	1	0	3023	153.75	179.5	333	708	315	141.75	552.25	344	824.5	2648.75	91.5	90.5	498.75	943.75	366.5	311.75	461.75	523.5
2014	S1	3181	3181	Intervention	7	NA	1	36.2	NA	NA	NA	1	1	1	M	47	Negative	4/05/2012	NA	0	3	0	2472	583	44.5	5802.5	167.5	486.75	53.5	417.25	104.5	7605.5	9338.5	1758.75	128	224.25	123.25	60.75	151	113.5	54.25
2014	S1	3181	3181	Intervention	7	NA	1	36.4	NA	NA	NA	1	0	1	F	38	Negative	4/05/2012	NA	0	3	0	2112	1765	182.5	4375	788	6863	566.5	6702.5	200.5	12912.5	17901	1321.5	282.25	934.5	1208.25	374	2718.5	124.75	122.25
2014	S1	3181	3181	Intervention	7	NA	1	37	NA	NA	NA	1	0	1	M	8	Positive	4/05/2012	PfPvPo	2	1	0	2870	293.75	597.25	NA	1730.5	5339.5	850.25	842	NA	9463.75	15319.5	195.5	212.5	NA	NA	NA	NA	1034.25	1292
2014	S1	3181	3181	Intervention	7	34.01	1	37.1	NA	NA	NA	1	0	1	F	20	Positive	4/05/2012	Pv	1	1	0	2863	369.75	1050.75	NA	972.5	477.5	NA	5736.5	NA	1167.75	1272.75	209.5	156.75	NA	NA	NA	NA	609.75	710.5
2014	S1	3181	3181	Intervention	7	NA	1	36.9	NA	NA	NA	1	0	1	M	6	Positive	4/05/2012	Pv	1	1	0	3118	141.75	225.5	NA	747.5	364.25	174.5	187	537	NA	NA	105	108.5	NA	NA	NA	NA	542.25	644.5
2014	S1	3185	3185	Control	3	NA	0	36.5	NA	NA	NA	0	0	1	F	20	Negative	8/05/2012	NA	0	3	0	2970	36	43.5	65	64.5	725.5	51	162	80.5	63	165.25	38.25	38.5	133.75	150	55.75	62.25	57.75	54.5
2014	S1	3185	3185	Control	3	NA	0	36.5	NA	NA	NA	0	0	1	F	10	Negative	8/05/2012	NA	0	3	0	2919	28	34	35.5	41	34	36	31	39	35	55.25	41.5	35	61.75	68.25	48.25	35.5	44.5	42
2014	S1	3190	3190	Control	4	NA	0	36.8	NA	NA	NA	1	0	1	F	30	Negative	6/05/2012	NA	0	3	0	2470	21.5	52	23.5	32	152	27.75	87	35	68	122.25	27	26.5	39.75	41	37.5	29.5	32.5	29
2014	S1	3190	3190	Control	4	NA	0	36	NA	NA	NA	0	0	1	M	20	Negative	6/05/2012	NA	0	3	0	2634	459	54.5	40.5	832	62.5	44.5	975.25	55	41.5	926.25	188.25	54.25	145.25	130.5	56	83.5	49	54
2014	S1	3190	3190	Control	4	NA	0	36	NA	NA	NA	1	0	1	M	58	Negative	6/05/2012	NA	0	3	0	2753	34.5	50	43.5	110.5	265	44	682.75	68.5	56	193	40	40.5	125.75	197	72.25	44	56	57.75
2014	S1	3190	3190	Control	4	NA	0	36.5	NA	NA	NA	0	0	1	M	60	Negative	6/05/2012	NA	0	3	0	2946	30	61	157.75	63	39	36	48.5	38.75	194	490.5	30.5	31	52.75	62.75	42.5	30.5	36.5	36.75
2014	S1	3190	3190	Control	4	NA	1	36.8	NA	NA	NA	0	0	1	M	70	Negative	6/05/2012	NA	0	3	0	2524	612	143.25	101.5	1377.75	5819.5	60.25	11327.5	62.75	5956.75	8243.75	159	77	104	354.5	69	124.75	62.75	59.5
2014	S1	3190	3190	Control	4	NA	0	36	NA	NA	NA	0	0	1	M	7	Negative	6/05/2012	NA	0	3	0	2313	22	26.75	22.5	28	26.75	27.75	28	27.75	27.5	29.5	27.5	28.25	63.75	57	35.5	24.5	30	29
2014	S1	3190	3190	Control	4	NA	1	37.5	NA	NA	NA	1	0	1	F	40	Negative	6/05/2012	NA	0	3	0	2597	NA	46.5	137	195	1363	49.5	NA	122.5	1183	NA	NA	223.5	326.25	161.5	62.5	64.5	63	53.25
2014	S1	3190	3190	Control	4	NA	1	36.8	NA	NA	NA	1	0	1	F	60	Negative	6/05/2012	NA	0	3	0	1995	NA	68.25	245.5	1322.25	NA	51.5	13593.5	158	NA	21707.75	NA	NA	605	1211	898.75	1509	74.75	68.5
2014	S1	3192	3192	Intervention	3	NA	0	36	NA	NA	NA	1	0	1	M	49	Negative	7/05/2012	NA	0	3	0	3110	291.75	48.5	611	84.5	131	78.25	8742.75	61.25	453.25	727	242.5	138	145.5	132.75	72.5	1489.5	120.75	66.5
2014	S1	3192	3192	Intervention	3	NA	0	36	NA	NA	NA	1	0	1	F	30	Negative	7/05/2012	NA	0	3	0	3058	65.5	73.5	319	131.25	577.75	50	688.75	78.75	596	843.5	100.5	59.5	101	160.25	81.75	121.5	80.5	73.75
2014	S1	3194	3194	Intervention	3	NA	0	36.7	NA	NA	NA	0	0	1	F	17	Negative	6/05/2012	NA	0	3	0	3419	37.5	35	221.5	87	41.25	37.25	151.5	41	39.5	77.5	34.25	36.5	74	80.5	46.25	102	44.5	44.75
2014	S1	3194	3194	Intervention	3	NA	0	37.1	NA	NA	NA	0	0	1	M	5	Negative	6/05/2012	NA	0	3	0	3221	24.5	32.5	30	35.5	26.5	31.5	29.5	35	26.5	33.5	32.25	29.5	58.25	65	45	31	43.5	36.5
2014	S1	3194	3194	Intervention	3	NA	0	36.8	NA	NA	NA	0	0	1	M	3	Negative	6/05/2012	NA	0	3	0	3366	26.5	36.5	35.75	43.5	30.5	36	39.5	42.5	34.75	34.5	32.5	35.5	51	54.5	51	34.5	43.25	43.75
2014	S1	3194	3194	Intervention	3	NA	0	36.5	NA	NA	NA	0	0	1	M	5	Positive	6/05/2012	Pv	1	1	0	3393	91.5	154	197.25	512.5	116.75	102.25	620	299	158.5	137.5	80.5	86.75	276.5	625.5	323.75	262.5	349.5	408
2014	S1	3194	3194	Intervention	3	40.39	0	36.6	NA	NA	NA	0	0	1	F	4	Positive	6/05/2012	Pv	1	1	0	2869	145.75	209	287.75	720.5	1802.75	1304.5	2154	403.5	379.5	408	138.5	138.25	1079	1562.5	513	396	487	589
2014	S1	3197	3197	Control	3	NA	0	37	NA	NA	NA	1	0	1	M	14	Negative	8/05/2012	NA	0	3	0	3182	52.5	26.75	374	62.5	1778	397.75	249.75	109.5	215	603	34	28.5	61.75	105	36.75	526.25	27.5	28.5
2014	S1	3197	3197	Control	3	40.39	1	37	NA	NA	NA	1	0	1	F	23	Positive	8/05/2012	Pf	1	1	0	2476	140.5	44.5	72	165	326	53.75	3995.5	174	444.25	1143.5	74	42.25	66.5	280.5	74.5	211	78.75	80
2014	S1	3197	3197	Control	3	42.77	0	36.5	NA	NA	NA	1	0	1	M	15	Positive	8/05/2012	PfPv	2	3	0	3037	40.5	58.5	66.5	1629	426	41.75	17357.25	82.75	1319.5	2915.5	35.75	36	152.75	281.25	59.5	171.5	51	51
2014	S1	3197	3197	Control	3	38.11	1	38	NA	NA	NA	1	0	1	F	50	Positive	8/05/2012	Pv	1	1	0	2836	1397.25	185	753.5	797	210.5	138.75	346.5	393	970.75	1062.25	437	425	824	NA	400.75	1963	425.75	569.25
2014	S1	3197	3197	Control	3	44.96	0	36.5	NA	NA	NA	0	0	1	F	55	Positive	8/05/2012	Pv	1	1	0	2661	543	282.5	317	2048.5	7654	177.5	NA	518	1439.5	2517	254	242	639.5	1165	515	2096.75	551	728.25
2014	S1	3197	3197	Control	3	NA	0	36.5	NA	NA	NA	0	0	1	F	45	Negative	8/05/2012	NA	0	3	0	2958	755.75	49	72.5	77	502	42	236	49.5	408	834.25	208.25	120.25	241.75	165.75	69.5	9538.25	57.5	47.5
2014	S1	3197	3197	Control	1	NA	0	36.5	NA	NA	NA	0	0	1	F	19	Negative	8/05/2012	NA	0	3	0	3196	20.5	24.5	21.75	25.5	32.5	30	22.5	22.75	24	23	25	26.75	39.5	39.5	31.5	23.5	25	25.5
2014	S1	3197	3197	Control	3	NA	1	37.5	NA	NA	NA	1	0	1	F	42	Negative	8/05/2012	NA	0	3	0	3124	485.25	244	49.5	140	899	172.5	6329.75	51	7008	7845.5	233	41	94	176.5	51	41.5	46	43
2014	S1	3203	3203	Intervention	3	NA	0	36.3	NA	NA	NA	0	0	1	F	60	Negative	4/05/2012	NA	0	5	0	3033	528.5	3454	478	2270.25	143.5	159.5	9817.75	790.25	8299.25	9089.25	360.5	609.5	748.75	1087	715.5	2244.75	606.25	761.75
2014	S1	3203	3203	Intervention	3	NA	1	36.9	NA	NA	NA	0	0	1	F	7	Negative	4/05/2012	NA	0	3	0	3584	44.25	33.5	33.5	52.75	36.75	37.5	329.75	43.5	41	91.5	33.5	31	118.5	123.25	51.25	47	137.75	49.5
2014	S1	3203	3203	Intervention	3	NA	1	36.8	NA	NA	NA	0	0	1	M	3	Negative	4/05/2012	NA	0	3	0	3127	31	40.25	40	52	33.5	39.5	33.25	48	30.5	31.5	34.5	35.5	66.5	77.5	60.5	43.25	66.5	53.5
2014	S1	3203	3203	Intervention	3	NA	1	36.8	NA	NA	NA	0	0	1	M	35	Negative	4/05/2012	NA	0	3	0	3154	360.25	386.5	467.5	101.5	900	110.75	1514.25	53.25	1270	1325	450	44	179.25	79	44	74.5	40	37.75
2014	S1	3203	3203	Intervention	3	NA	0	36.6	NA	NA	NA	0	0	1	F	11	Negative	4/05/2012	NA	0	3	0	3156	47.5	35.75	33.5	74.5	247	44.5	68.5	107.25	700.25	1271	33	34.5	107.25	130.75	71.25	39	45.5	42.5
2014	S1	3203	3203	Intervention	3	NA	0	36.6	NA	NA	NA	0	0	1	M	7	Negative	4/05/2012	NA	0	3	0	3436	23	28.5	24	33.5	NA	32.75	27	32.75	51.5	31.75	28	29	38	47	40.5	26	33	31.5
2014	S1	3203	3203	Intervention	3	NA	0	36.1	NA	NA	NA	0	0	1	F	6	Negative	4/05/2012	NA	0	3	0	3467	29	26.75	22	28.5	29.5	31	23.5	27	23.5	26	27	26.75	39.5	41.75	36.5	25	29.5	28.5
2014	S1	3203	3203	Intervention	3	NA	0	36.1	NA	NA	NA	0	0	1	M	30	Negative	4/05/2012	NA	0	5	0	3100	983	223	656	845.25	802.75	139.75	3468	752.25	2023.75	3017	516.75	354.25	749.5	1070.5	595	833.5	502.25	681.5
2014	S1	3203	3203	Intervention	3	NA	0	37	NA	NA	NA	0	0	1	M	2	Negative	4/05/2012	NA	0	4	0	3356	21	27.5	24.5	28.5	23.5	25.5	22.5	28	39.5	22.5	25.5	27	34.5	40.5	36.5	24	29.5	29.5
2014	S1	3203	3203	Intervention	3	NA	1	36.8	NA	NA	NA	0	0	1	F	14	Negative	4/05/2012	NA	0	3	0	3347	26.5	37	77	48	31.5	37	120	58.75	101	66.25	34.5	31.5	121.75	77.5	50	35.5	45.5	42.75
2014	S1	3203	3203	Intervention	3	NA	0	36.4	NA	NA	NA	0	0	1	F	30	Negative	4/05/2012	NA	0	3	0	2953	1825.5	371.5	81.5	272	1173.75	60	937.75	62.5	473.25	1133	683.25	201.5	416	215	104.5	382.5	74.5	60
2014	S1	3203	3203	Intervention	3	NA	0	36.5	NA	NA	NA	0	0	1	F	12	Negative	4/05/2012	NA	0	3	0	3300	26.5	30.5	132	43	135.5	82	420.25	35.5	918.25	379	32.5	31.5	49.5	60.5	40.5	28.5	36	36
2014	S1	3203	3203	Intervention	3	NA	0	36.5	NA	NA	NA	0	0	1	F	2	Negative	4/05/2012	NA	0	3	0	3170	24.5	30.5	29.5	35	25.5	31	26.5	34.75	26.5	28.5	28.25	28.5	39.25	48	44.5	30	41.25	37.75
2014	S1	3203	3203	Intervention	3	NA	0	36.3	NA	NA	NA	0	0	1	M	25	Negative	4/05/2012	NA	0	3	0	2865	1929.25	352.75	628.5	99.5	7529.5	172.5	1589	72.25	2881.5	5260.5	170	149.25	179.25	295.25	113.5	103.75	56.75	55
2014	S1	3203	3203	Intervention	4	NA	0	36.7	NA	NA	NA	0	0	1	F	24	Negative	4/05/2012	NA	0	3	0	3441	26.5	29.5	27.5	35.5	29.5	30.75	117	31	168.75	279.75	35.75	30	73.5	54.75	39.25	79.5	37.5	33
2014	S1	3203	3203	Intervention	3	NA	0	36	NA	NA	NA	0	0	1	M	3	Negative	4/05/2012	NA	0	3	0	3284	28	32.5	26.5	40.5	25.5	30.5	25.5	33	34	27.5	29.5	31	39	51.75	41	30	44.5	35.5
2014	S1	3203	3203	Intervention	3	NA	0	37	NA	NA	NA	0	0	1	M	10	Negative	4/05/2012	NA	0	3	0	3281	26	31.5	53.5	61	27.5	32.25	172.75	41.5	386.25	419	35.25	33.5	72.25	80.25	45	71.25	49.25	38.5
2014	S1	3203	3203	Intervention	3	NA	0	36.5	NA	NA	NA	0	0	1	F	28	Negative	4/05/2012	NA	0	3	0	3180	153	41	43.5	52	38.5	39.5	1009.5	51.25	521	833	112.5	100.75	88.5	97	56	77.5	75	52
2014	S1	3203	3203	Intervention	3	NA	0	36.5	NA	NA	NA	0	0	1	M	17	Negative	4/05/2012	NA	0	3	0	3359	56.5	77	2326	90	114.25	63	355.25	44	259.25	455.5	36.5	36.5	62.75	76	52.5	54	71.75	45
2014	S1	3203	3203	Intervention	3	NA	1	36.9	NA	NA	NA	0	0	1	F	29	Negative	4/05/2012	NA	0	3	0	2322	391.75	40.5	402.75	134.75	6531.75	270.5	3660	96.5	453.5	2383.75	330.25	151	159	179.25	60.5	192	67.25	52.5
2014	S1	3203	3203	Intervention	3	NA	0	36.3	NA	NA	NA	0	0	1	M	6	Negative	4/05/2012	NA	0	3	0	2881	22.5	29.5	25.5	32.5	28.5	28	50	32.75	29	37	28.5	28	34.5	43	41	29.5	43.25	34
2014	S1	3203	3203	Intervention	3	NA	1	36.7	NA	NA	NA	0	0	1	F	35	Negative	4/05/2012	NA	0	3	0	2482	331.5	43	199.75	190.25	263.5	35.75	5601.75	63	1125.75	1062.25	96.25	118.5	97	96.75	61.25	368	42	41.5
2014	S1	3203	3203	Intervention	3	NA	0	36.4	NA	NA	NA	0	0	1	F	15	Positive	4/05/2012	Pv	1	1	0	2923	389.75	209.5	2275.75	804	655.5	452.25	168	466.75	288.25	568.25	110.5	124	477	921	443	529.25	507	661.5
2014	S1	3203	3203	Intervention	3	NA	0	36.3	NA	NA	NA	0	0	1	F	41	Negative	4/05/2012	NA	0	3	0	2412	1170.75	2338.5	76	151	2762	110.5	6041.25	237.5	470.5	2607.5	1992	373	409.25	971.75	54.5	754.5	50	45.75
2014	S1	3203	3203	Intervention	3	NA	0	36.1	NA	NA	NA	0	0	1	F	15	Negative	4/05/2012	NA	0	3	0	3716	20	23	24.5	24.5	272.75	33.75	27.5	32.25	199	361.5	25	22.5	24.5	30.5	26.25	27	21	23
2014	S1	3203	3203	Intervention	3	NA	0	36.3	NA	NA	NA	0	0	1	F	13	Negative	4/05/2012	NA	0	3	0	2998	85.25	35.25	464	90	1287.75	37	452.5	41.75	495.5	663.5	31.5	36.5	343	171.25	51.25	35	44	51.5
2014	S1	3203	3203	Intervention	3	NA	0	36.3	NA	NA	NA	0	0	1	F	45	Negative	4/05/2012	NA	0	3	0	2705	246	35	105	308.75	449.25	175.75	5296.75	65.75	627	830.25	364	219.25	131.75	414.75	49.5	99.25	40.5	38.75
2014	S1	3203	3203	Intervention	3	43.06	0	36.1	NA	NA	NA	0	0	1	M	13	Positive	4/05/2012	Pv	1	3	0	2674	110.5	56.5	129.5	73.5	79	30.5	452	83	915.5	1288.5	30	31.5	67.75	152.5	60	51	38.5	37.25
2014	S1	3203	3203	Intervention	3	NA	0	36.1	NA	NA	NA	0	0	1	M	10	Negative	4/05/2012	NA	0	3	0	2995	20.5	27.5	23.5	35.5	2258	232.5	55.5	27	373.5	479.5	27.25	27	33	47.25	33	40	30.5	28.5
2014	S1	3203	3203	Intervention	3	NA	0	36.9	NA	NA	NA	0	0	1	M	2	Negative	4/05/2012	NA	0	3	0	2526	19.5	25	21	25.5	25.25	26.5	22	25.75	894.5	23.5	26	25.5	29.5	37	32.25	22	27	26
2014	S1	3203	3203	Intervention	3	NA	0	36.3	NA	NA	NA	0	0	1	M	40	Negative	4/05/2012	NA	0	3	0	2668	368.75	61.5	34.5	85.75	1239.5	214.5	464.75	34.5	465.25	739.25	938.5	164.5	160	782	35.75	58	30	29
2014	S1	3203	3203	Intervention	3	NA	0	36.1	NA	NA	NA	0	0	1	F	20	Negative	4/05/2012	NA	0	5	0	2776	310.5	282.25	3425.5	742.5	652.75	297	809.75	648.25	880.75	1324.5	101.75	88.5	391	721	501	390.5	433.25	544
2014	S1	3203	3203	Intervention	3	NA	0	36.2	NA	NA	NA	0	0	1	M	2	Negative	4/05/2012	NA	0	3	0	3033	18	23	18.5	29	22	21.5	19.5	23.5	20.5	18.75	23.5	25	22	29.5	28	22.5	24	23
2014	S1	3203	3203	Intervention	3	NA	1	36.1	NA	NA	NA	0	0	1	F	11	Negative	4/05/2012	NA	0	3	0	2703	21	28.75	97.5	33.5	286.75	31.25	101.25	27.5	370.25	287.5	28.5	27.5	53.5	58	50	26	29.5	28.5
2014	S1	3203	3203	Intervention	3	NA	1	36.3	NA	NA	NA	0	0	1	F	6	Negative	4/05/2012	NA	0	4	0	1383	17	21	15	22.5	18.5	19	18.75	16.5	20	19.5	23	20	20.25	27	28.25	16.25	19.5	20.75
2014	S1	3204	3204	Intervention	3	44.9	0	36.5	NA	NA	NA	0	0	1	M	6	Positive	7/05/2012	Pv	1	1	0	2745	83.5	130	167	436.5	215.75	97	506.5	297	170.5	NA	73.75	73	407.5	NA	279.75	NA	314.5	370.75
2014	S1	3204	3204	Intervention	3	NA	0	37	NA	NA	NA	0	0	1	F	67	Negative	7/05/2012	NA	0	3	0	2686	968	165.5	650.25	146.25	148	52	2387.25	78	828	2211.5	251.75	555	261.5	362	683.25	557.25	59.25	59.5
2014	S1	3206	3206	Control	4	NA	1	37.5	NA	NA	NA	1	0	1	F	17	Negative	6/05/2012	NA	0	3	0	2560	52.5	29	338.75	55.5	49	46.5	456.5	36.75	452.25	290.25	29.5	31.75	51.25	58.25	36.5	172.25	35.5	31.5
2014	S1	3206	3206	Control	4	NA	1	37.5	NA	NA	NA	1	0	1	M	8	Negative	6/05/2012	NA	0	3	0	2748	22	26.75	23.5	37	130	30.75	27	37	38	45.5	28.5	26.75	36.5	44.5	34	25	30	33.5
2014	S1	3206	3206	Control	4	NA	1	36.3	NA	NA	NA	1	0	1	F	5	Negative	6/05/2012	NA	0	3	0	2914	22	27	35.25	33	30.5	29	25	27	28.25	69.5	26	28.5	42.25	42.5	34.25	23.75	29.5	30
2014	S1	3206	3206	Control	4	NA	1	36.8	NA	NA	NA	1	0	1	F	17	Negative	6/05/2012	NA	0	3	0	2566	44.5	63.5	1306	144.5	1149	57.5	601.75	54	1137.25	3394.75	46	41.5	158	557.5	60	42.75	56	73.5
2014	S1	3206	3206	Control	4	NA	1	36.6	NA	NA	NA	1	1	1	F	30	Negative	6/05/2012	NA	0	3	0	2512	146.75	144	128.5	323.75	5118.5	38.75	2518.25	112	376	3588.25	171	321.75	314.25	1006.5	63	380	129	55.25
2014	S1	3207	3207	Intervention	1	NA	0	37.1	NA	NA	NA	1	0	1	F	7	Positive	8/05/2012	Pv	1	1	0	2955	110.5	NA	NA	NA	98.5	125.75	106.75	NA	NA	NA	103	107.25	NA	NA	NA	NA	NA	NA
2014	S1	3207	3207	Intervention	3	NA	0	35.8	NA	NA	NA	0	0	1	F	25	Negative	8/05/2012	NA	0	3	0	2274	499.5	106.75	8691.5	382.5	10352	355.5	4274.5	181.5	1246.5	1439.5	189.5	70.25	474.75	5797.75	1983	586.5	303	139
2014	S1	3215	3215	Control	4	NA	1	36.3	NA	NA	NA	1	1	1	F	22	Positive	7/05/2012	PfPm	2	1	0	2717	NA	186.25	5774.75	849.5	1296	138.75	9592.25	425.5	5822	9698	283	116.75	503	NA	NA	1875	403.5	538.75
2014	S1	3215	3215	Control	4	42.43	0	36	NA	NA	NA	0	0	1	M	6	Positive	7/05/2012	PfPv	2	1	0	2602	131	778	443.25	842.25	143	141.5	5602.25	378.25	1136.5	2880	103.25	111.5	407.5	NA	376	360.5	453	481.75
2014	S1	3215	3215	Control	4	NA	1	36.2	NA	NA	NA	1	0	1	F	29	Negative	7/05/2012	NA	0	3	0	2216	395.25	77.5	2462.25	174.5	615.25	51	8132.5	177.75	1398.5	7110.5	369.5	407	190.75	4423.25	142.25	183.75	73.5	70.5
2014	S1	3215	3215	Control	4	NA	1	36.2	NA	NA	NA	0	0	1	M	2	Negative	7/05/2012	NA	0	3	0	2774	21.5	25.25	23.5	26.5	25	26.5	23.5	25	24	27	27	27	28.5	41	34	24	29.5	28.5
2014	S1	3215	3215	Control	4	42.37	0	36	NA	NA	NA	0	0	1	F	35	Positive	7/05/2012	Pf	1	1	0	2712	2537	236.5	379	1264.25	1346	649.75	7097	613.5	3602.25	13161	1050.25	577.25	1294.5	2811.25	629.5	1005	584.75	860.5
2014	S1	3218	3218	Intervention	2	NA	1	35.7	NA	NA	NA	0	0	1	M	4	Negative	11/05/2012	NA	0	3	0	3000	27.25	34.5	34	39.5	47	38	32	40.5	27	126.5	34	31	46.5	52.5	51.25	33	41.5	48.5
2014	S1	3218	3218	Intervention	2	NA	1	36.6	NA	NA	NA	0	0	1	M	8	Negative	11/05/2012	NA	0	3	0	2526	29.5	48.5	40.25	48	287	52.5	91.25	54.75	54.5	181.5	31	37.5	91	110.5	62.5	40.5	60.25	46
2014	S1	3218	3218	Intervention	2	36.49	0	36.9	NA	NA	NA	0	0	1	F	14	Positive	11/05/2012	PfPv	2	1	0	2789	249.5	541.75	7321	903	3692.25	NA	399.5	NA	NA	NA	166	192.5	920	NA	NA	NA	643.5	786
2014	S1	3221	3221	Intervention	2	NA	0	36	NA	NA	NA	1	0	1	M	10	Negative	11/05/2012	NA	0	3	0	2761	25	30.5	27	68.25	31	31.5	134	33.25	62	60.25	30.75	32	70	74.5	58.5	28	35	34
2014	S1	3221	3221	Intervention	2	NA	1	36.8	NA	NA	NA	1	0	1	M	65	Negative	11/05/2012	NA	0	5	0	3316	157	116.25	215	366.5	213	71.5	106.25	254.75	249.25	1277	111.25	81.5	320	346	193	133.25	205	223.25
2014	S1	3221	3221	Intervention	2	NA	1	36.8	NA	NA	NA	1	0	1	M	25	Negative	11/05/2012	NA	0	3	0	2338	206.25	53.5	1194.5	127.75	586.75	72	7519.5	61.75	2874	3484.75	393	53.5	199.75	248.75	57.5	62.5	57.25	45.5
2014	S1	3223	3223	Control	3	NA	0	37	NA	NA	NA	0	0	1	M	15	Positive	14/05/2012	Pv	1	1	0	2813	204.75	243.5	550.5	899.25	2751.5	560.5	1687.5	630.75	4437.5	6285	143.75	139.25	512	839.5	440	NA	691.75	670.75
2014	S1	3223	3223	Control	3	42.65	1	36.8	NA	NA	NA	1	0	1	M	25	Positive	14/05/2012	Pf	1	1	0	2462	628.25	493	711	1190	596	323.75	5206.5	872.5	6656	7596.5	271.5	214.75	997.25	NA	730.75	764.5	950.5	1007
2014	S1	3223	3223	Control	1	NA	1	37	NA	NA	NA	1	1	3	F	19	Negative	14/05/2012	NA	0	3	0	2850	54.25	27	112	37.5	1434	45	1054.5	36	143.5	712	27	28.5	83	94.5	40.5	24.5	30	32
2014	S1	3223	3223	Control	1	NA	1	36.9	NA	NA	NA	1	0	1	M	58	Positive	14/05/2012	Pv	1	1	0	2880	77.75	98.5	140	341.25	296.75	94.25	469.5	205	211.25	397.25	62.75	65.5	195.25	414	194.5	161	225	272.25
2014	S1	3223	3223	Control	3	41.22	1	37.5	NA	NA	NA	1	1	1	F	20	Positive	14/05/2012	Pf	1	1	0	2754	92	132	163.5	488	79.75	98.75	700.5	264	346.75	473.25	82.5	77.5	271	457.25	253.75	497.25	303.25	325.5
2014	S1	3223	3223	Control	1	NA	1	36.8	NA	NA	NA	0	0	2	F	7	Negative	14/05/2012	NA	0	3	0	3452	26.5	31	29.5	37	26	31.5	27	35.75	27	31	30	31	85.5	80.5	43	31.75	37.5	38
2014	S1	3224	3224	Control	3	NA	1	36.5	NA	NA	NA	0	0	1	M	10	Negative	14/05/2012	NA	0	3	0	2950	27.5	36.5	35.75	57.5	139.25	82.5	121.5	117.75	38.75	92	35	37.5	62.5	70.5	62.5	46	44.5	45
2014	S1	3224	3224	Control	3	NA	0	36	NA	NA	NA	0	0	1	F	7	Negative	14/05/2012	NA	0	3	0	2783	27.5	78	38.5	52.5	31.5	36	98.5	67.5	30	35	32.5	33	71	69	57.25	39	56	49.75
2014	S1	3224	3224	Control	3	NA	1	37	NA	NA	NA	0	0	1	M	50	Negative	14/05/2012	NA	0	3	0	2578	NA	78.5	8314.5	1165.75	NA	316.5	9074	127.25	1458.5	NA	156.25	96.25	139.5	976.25	105.75	60.5	76.5	63.25
2014	S1	3224	3224	Control	3	NA	0	36	NA	NA	NA	0	0	1	F	60	Negative	14/05/2012	NA	0	3	0	2809	280.75	69	1403	97	1012.5	40.25	5972.75	95.25	1434.5	3278.5	249.5	54	135.25	135	67	87.5	77	60.25
2014	S1	3224	3224	Control	2	NA	0	36.2	NA	NA	NA	0	0	1	F	7	Negative	14/05/2012	NA	0	4	0	3141	33.5	36.5	34.5	102	98	82.5	34	42.5	28.25	42.5	39.5	38.5	98	95.75	51	42	42.5	50
2014	S1	3225	3225	Control	2	42.68	0	37	NA	NA	NA	0	0	1	M	29	Positive	14/05/2012	Pf	1	3	0	2639	283	1108.25	802	192	10061.75	2899.75	1002.75	106.25	2059.5	3395	57.5	55	129	192.25	93.75	145.5	214	99.5
2014	S1	3225	3225	Control	2	NA	0	35.7	NA	NA	NA	1	0	1	F	14	Negative	14/05/2012	NA	0	3	0	2832	32.5	38.25	43.25	46	34.5	36.75	881	46	80	85.25	34	36	90.75	92.5	54	43	51	47
2014	S1	3225	3225	Control	2	NA	1	36.1	NA	NA	NA	1	0	1	M	60	Negative	14/05/2012	NA	0	3	0	2726	1304.75	211.5	168.75	112.75	454.25	167.75	2949	213.75	811.5	2203.75	503.5	92.5	840.5	568.5	119	102.5	89.75	95.5
2014	S1	3225	3225	Control	2	NA	1	35.4	NA	NA	NA	0	0	1	F	51	Negative	14/05/2012	NA	0	3	0	2916	832	60	2098.5	359.5	2953.5	77.75	1398.5	94.25	1287.5	1400.5	552.75	214.5	316	283	85	234.75	87.5	83
2014	S1	3225	3225	Control	2	NA	0	37	NA	NA	NA	0	0	1	M	15	Negative	14/05/2012	NA	0	3	0	2886	113.5	47	57.5	67.5	63.25	51.5	923.75	58	55	191.5	37.25	40.5	123.75	137.75	67	64	57	60
2014	S1	3235	3235	Intervention	2	NA	0	36.5	NA	NA	NA	0	0	1	M	12	Positive	14/05/2012	Pv	1	1	0	2898	129.5	174	NA	533.25	200.5	144	758.75	348.5	340.25	573.75	112	209	389	571	369.25	NA	375	397
2014	S1	3238	3238	Control	2	37.7	0	36.5	NA	NA	NA	0	0	1	F	50	Positive	11/05/2012	Pf	1	1	0	2560	2368.75	712.25	6643.5	837	364.5	142.75	15041	508	3833.75	11090	224.75	167.25	492	2852.75	618.25	590.5	419.5	544.5
2014	S1	3244	3244	Intervention	2	NA	1	36.4	NA	NA	NA	0	0	1	F	30	Negative	11/05/2012	NA	0	4	0	1464	1095.75	35	70.75	53.25	2512	329.25	1221.5	45.25	543.75	1210	377.75	160.25	245.5	115	50.5	49.75	40	53.5
2014	S1	3248	3248	Intervention	3	NA	1	37	NA	NA	NA	1	0	1	F	40	Negative	30/04/2012	NA	0	5	0	2985	999	361.5	680.5	902.75	307.25	281	816.5	661	697.25	1009	156.5	200.5	615.5	1228.75	662.5	613.5	698	734.5
2014	S1	3249	3249	Control	3	NA	1	37	NA	NA	NA	0	0	1	M	9	Negative	1/05/2012	NA	0	3	0	2999	26.5	32	41.5	37.5	26.5	32.5	33	34.75	29.5	36	44.5	37.5	61	64.5	44.5	46.75	37.5	40
2014	S1	3249	3249	Control	3	NA	0	36.8	NA	NA	NA	0	0	1	M	10	Negative	1/05/2012	NA	0	3	0	3235	45.25	38	49	52	33	50	39	46.25	37	114.25	38	40.5	94.5	89	58	47	50	51.5
2014	S1	3250	3250	Control	5	NA	0	36.7	NA	NA	NA	0	0	1	F	53	Negative	1/05/2012	NA	0	3	0	2948	NA	72	82	132.25	127.25	70	826.5	313.75	183	466.5	768.25	NA	776.75	230	114.5	186	101.75	92.5
2014	S1	3250	3250	Control	5	NA	0	35.8	NA	NA	NA	0	0	1	M	3	Negative	1/05/2012	NA	0	3	0	3033	51.5	50.25	55.5	82.5	47.5	53.5	47.5	71.5	41.5	51.5	45	41.5	889.75	733.5	74.5	123	66	72.5
2014	S1	3250	3250	Control	5	NA	0	35.9	NA	NA	NA	0	0	1	M	6	Negative	1/05/2012	NA	0	3	0	3104	31.5	42.5	39.25	55	42.5	41.25	43	51	37	41	41.5	37	NA	NA	59	43.25	54.5	55
2014	S1	3250	3250	Control	10	NA	0	36.1	NA	NA	NA	0	0	1	M	21	Negative	1/05/2012	NA	0	3	0	3261	346	599.75	58	101.75	54	51.75	4504.5	81.5	202	621.25	86.5	137.5	173	482.75	113	170.5	184.5	96
2014	S1	3250	3250	Control	5	NA	1	36.1	NA	NA	NA	0	0	1	F	13	Negative	1/05/2012	NA	0	3	0	2846	518.5	120	297	83.75	3345.75	1620	438.5	76.5	181.5	486.75	46	93	162	205	74.5	683	82.75	93.75
2014	S1	3252	3252	Intervention	7	NA	0	36.8	NA	NA	NA	0	0	1	M	10	Negative	30/04/2012	NA	0	3	0	2889	33	51.5	51.5	70	45.5	46.5	622.75	81	53	125	56.25	42	137.75	180.5	72.25	58.5	60.25	65.5
2014	S1	3254	3254	Control	5	NA	1	36.9	NA	NA	NA	1	0	1	F	16	Positive	30/04/2012	Pf	1	1	0	2794	277.75	479.75	8547.25	2323	1580.75	82.5	24453.25	513.5	16471	21768.25	81	368	341.5	488.5	194	284.75	268	257
2014	S1	3254	3254	Control	5	32.9	1	37.9	NA	NA	NA	1	0	1	M	6	Positive	30/04/2012	Pv	1	1	0	2639	119	152.5	170	453.5	652.75	464.25	512.25	291.5	256.75	739	104	117.5	587	701	324	300	324.5	296.5
2014	S1	3254	3254	Control	5	NA	1	36.5	NA	NA	NA	1	0	1	M	4	Negative	30/04/2012	NA	0	3	0	2482	36.25	45	36.75	77.25	1686.5	1083	49	63	117.5	449	36	44.75	112	488	58.5	72.25	45.25	62.75
2014	S1	3254	3254	Control	5	NA	1	37.1	NA	NA	NA	1	0	1	M	29	Negative	30/04/2012	NA	0	3	0	2777	1312.75	96	868.75	213	2052	215.5	1533.5	109	753	1880.25	2490.5	185	400.75	595.25	92.5	76.5	68	66
2014	S1	3254	3254	Control	5	NA	1	36	NA	NA	NA	1	0	1	F	6	Negative	30/04/2012	NA	0	3	0	2803	27	41.5	39.5	87.5	33.5	38	38	80.5	30.5	434	37.5	34.5	165.75	175.25	59	43.5	65.5	49
2014	S1	3254	3254	Control	5	NA	1	36.2	NA	NA	NA	1	0	1	M	6	Positive	30/04/2012	Pv	1	3	0	3195	46	83.25	66	111	61	67.5	44	82	44	61.5	46	47	159.5	172.5	90.25	105.5	102.75	98
2014	S1	3254	3254	Control	5	42.08	1	36.8	NA	NA	NA	1	0	1	M	4	Positive	30/04/2012	Pv	1	1	0	2853	115	151.5	226.5	524.25	788	141	359.5	283.75	174.5	341.5	96.5	102	326.25	556.25	281	243.25	331.5	351.25
2014	S1	3254	3254	Control	5	44.6	1	37	NA	NA	NA	1	0	1	M	55	Positive	30/04/2012	Pf	1	1	0	2732	1280.25	165	396.5	541.25	3560.25	252.5	846.5	281	3154.25	3512	596	388.5	696.25	527.75	229.75	334.5	299.5	305.5
2014	S1	3255	3255	Intervention	2	NA	1	36.4	NA	NA	NA	1	0	1	F	3	Negative	1/05/2012	NA	0	3	0	3360	30.5	37.5	36.5	46	32	37	48	56.75	36	52	46.75	35.5	952	842	49.5	42.5	50	45.75
2014	S1	3255	3255	Intervention	2	NA	1	36.8	NA	NA	NA	1	0	1	F	47	Negative	1/05/2012	NA	0	3	0	2848	162	50.75	60	153.5	303.25	39	497.25	69.5	275.75	4061.5	252	67.5	207	221.75	187.75	91.75	78	57.5
2014	S1	3255	3255	Intervention	2	NA	1	37	NA	NA	NA	1	0	1	F	9	Negative	1/05/2012	NA	0	3	0	3370	NA	NA	NA	NA	NA	NA	NA	NA	NA	NA	NA	NA	NA	NA	NA	NA	NA	NA
2014	S1	3257	3256	Intervention	5	NA	0	36.5	NA	NA	NA	0	0	1	F	25	Negative	NA	NA	0	3	0	3122	902	37.75	155.25	48.5	58	40.75	35.5	48	43.5	168	110.5	44	174.5	122.75	114	141	50.5	62.75
2014	S1	3260	3260	Intervention	5	NA	0	37.3	NA	NA	NA	1	0	1	F	65	Positive	1/05/2012	Pv	1	2	0	2631	3149.75	3631.5	2781.25	9871.5	21310	247	24203.5	749	19803.25	24273.5	4794.5	874.25	3348	2106.25	1418	755.25	734.5	791.25
2014	S1	3260	3260	Intervention	2	NA	1	37	NA	NA	NA	1	0	1	F	22	Negative	1/05/2012	NA	0	3	0	3126	117.25	150.25	227.5	383.5	129	59.75	2446.25	81.5	750.25	1748	181.25	59	272	217.5	76	134.25	111	96.5
2014	S1	3279	3279	Control	3	40.93	1	37.5	NA	NA	NA	0	0	1	F	68	Positive	16/05/2012	Pv	1	1	0	2841	412	1248.5	3035	1379	2123	141.5	2748.75	538	2908	4117.5	343.5	204	595.5	836.5	437.75	466.75	438.75	466.5
2014	S1	3279	3279	Control	3	NA	1	36.8	NA	NA	NA	0	0	1	F	29	Positive	16/05/2012	Pv	1	1	0	2475	1152.25	207.75	1113	832.25	2710.5	229	4298.25	453.25	2061	2713.5	318.25	209	712.5	803.5	421.5	780	659.5	614.5
2014	S1	3279	3279	Control	3	NA	1	36.8	NA	NA	NA	0	0	1	M	19	Positive	16/05/2012	Pf	1	1	0	2837	463.5	NA	NA	NA	NA	954	2259	NA	10540.5	NA	NA	NA	NA	NA	NA	NA	NA	NA
2014	S1	3279	3279	Control	3	NA	0	36.2	NA	NA	NA	0	0	1	F	16	Positive	16/05/2012	Pf	1	3	0	2982	42.5	368	205	108	445.25	53	1554.5	51.5	2454.5	2341	37	41	95	159.25	54.5	42	64	51.25
2014	S1	3279	3279	Control	3	NA	1	36.8	NA	NA	NA	0	0	1	F	50	Negative	16/05/2012	NA	0	3	0	2728	176.5	1103	98	588.25	265.5	51.75	6247.75	116	1729.25	4449	259.25	64.5	623	2635.5	1432	264.25	84	92.25
2014	S1	3279	3279	Control	3	39.47	1	36.8	NA	NA	NA	0	0	1	M	10	Positive	16/05/2012	PfPvPm	2	1	0	2702	662.75	146	168	553	278	142.5	1080.25	270	172.75	1996.5	100.5	96.25	389	533	259.25	5404	319.25	354.5
2014	S1	3279	3279	Control	3	37.49	1	36.8	NA	NA	NA	0	0	1	M	10	Positive	16/05/2012	Pv	1	1	0	2633	91.5	150	152.25	399	167.75	124	1350.5	208	212	197	78.5	80.5	357.5	500	232	213	265.5	281
2014	S1	3279	3279	Control	3	43.96	0	36	NA	NA	NA	0	0	1	M	12	Positive	16/05/2012	PvPm	2	1	0	2802	217	644	612.25	439.5	567.5	70.5	840.5	130.75	713.5	1284.75	64.25	63.5	216.75	372.25	146.75	1044	190.5	194.75
2014	S1	3279	3279	Control	3	42.62	1	37	NA	NA	NA	0	0	1	F	30	Positive	16/05/2012	Pv	1	1	0	2892	723.75	217	2535.25	5544	644.75	154	19531	525	1030.25	10031.25	335.25	186.5	568.25	731.75	376	639.5	435.75	468.25
2014	S1	3279	3279	Control	3	NA	1	36.8	NA	NA	NA	0	0	1	F	3	Negative	16/05/2012	NA	0	3	0	2823	186	266	102.25	340.25	1370	977	9677.75	73.25	5398.5	7522.25	105	63.25	343.5	407	87.5	123.5	99	80.5
2014	S1	3279	3279	Control	1	40.85	1	37	NA	NA	NA	0	0	1	F	60	Positive	16/05/2012	Pv	1	1	0	2814	136	206	261	779.75	157.5	163.5	526	366	162	284.75	237	127	717.5	1173	548.5	389	523.5	476.5
2014	S1	3280	3280	Intervention	3	NA	0	35.2	NA	NA	NA	1	0	1	M	32	Positive	14/05/2012	PfPv	2	1	0	2469	941	237	2682.75	815.75	1038	623.25	15461	578	11587	11740	560.5	839.75	816.25	757.25	590.5	751	543.5	699.25
2014	S1	3280	3280	Intervention	3	NA	1	36.5	NA	NA	NA	1	0	1	F	26	Negative	14/05/2012	NA	0	3	0	2724	437.5	217.75	1185	327	179.5	68	5263.75	189	2814	2499.5	322	200.5	446	219	126	230.5	318.75	139.5
2014	S1	3280	3280	Intervention	3	44.29	0	36.5	NA	NA	NA	1	0	1	F	8	Positive	14/05/2012	PvPm	2	1	0	2770	684.5	633.5	1218.25	1353.5	2428.25	2426.5	13139	835.5	4597.25	9253.5	190	244.25	922.75	1651.5	736.25	1962	995	1074.5
2014	S1	3280	3280	Intervention	3	NA	0	35.8	NA	NA	NA	1	0	1	F	18	Negative	14/05/2012	NA	0	3	0	3138	240	1063.25	208.5	100.5	1838.5	169.5	2528.5	74.5	1517.25	5697.5	264.5	102	159.25	219	65	74.25	67	84
2014	S1	3280	3280	Intervention	3	NA	0	35.7	NA	NA	NA	0	0	1	M	13	Negative	14/05/2012	NA	0	3	0	3189	68.25	95	50	60	76	37.5	3414.5	50.5	132.5	325.25	35.5	34	75.5	91.5	55.25	42.25	65.5	48
2014	S1	3283	3283	Control	3	NA	0	36.5	NA	NA	NA	0	0	1	F	35	Negative	15/05/2012	NA	0	3	0	3102	70	54.5	417.5	103.25	145	50.5	7359.5	82.75	337	344.5	41	49.5	106	126.5	87	93	216.5	89.5
2014	S1	3283	3283	Control	3	NA	1	36.8	NA	NA	NA	0	0	1	F	4	Negative	15/05/2012	NA	0	3	0	3302	42	59.5	65	108.5	108.5	84.5	59.5	81.75	39.5	54.5	45.5	56	106.25	131.5	90.75	76	206	88
2014	S1	3283	3283	Control	3	NA	0	36.6	NA	NA	NA	0	0	1	M	4	Negative	15/05/2012	NA	0	3	0	3400	28	73	35	46.5	28	35.5	32.25	45	31.5	52.5	38	35.75	83.5	91.75	56.5	47	68.25	55
2014	S1	3283	3283	Control	3	NA	0	36.6	NA	NA	NA	0	0	1	F	7	Negative	15/05/2012	NA	0	3	0	3479	46.5	58	59.5	75.5	40.75	53	61.5	73	41.5	57.5	43	71.25	107.5	128.5	87	65	108.5	80
2014	S1	3283	3283	Control	3	NA	0	36.5	NA	NA	NA	0	0	1	M	5	Negative	15/05/2012	NA	0	3	0	3111	33.25	46	47	71	395	106.25	57.75	56	34.5	39	48	53.5	85.25	188	71	54.25	66.5	68.5
2014	S1	3283	3283	Control	3	NA	0	35.6	NA	NA	NA	0	0	1	M	30	Negative	15/05/2012	NA	0	3	0	3096	104	50.5	54.5	78.75	435.5	59.5	554.5	74	63	47.25	52.25	50	160	2904.5	217	51.5	70.5	75.25
2014	S1	3283	3283	Control	3	NA	0	36.5	NA	NA	NA	0	0	1	M	7	Negative	15/05/2012	NA	0	3	0	3246	25.5	34.5	32.25	41	29.75	33.5	28	38	27	29.5	32.5	32	58	70.5	47.5	33.5	52.25	41
2014	S1	3283	3283	Control	3	NA	0	35.5	NA	NA	NA	0	0	1	F	17	Negative	15/05/2012	NA	0	3	0	2897	91.25	77.5	4328.5	1172.75	130.5	58.5	12456.75	117	2617	7914.75	50	70.5	174.75	297.5	108.75	407	271	108.5
2014	S1	3283	3283	Control	3	NA	0	36.4	NA	NA	NA	0	0	1	M	13	Negative	15/05/2012	NA	0	4	0	3127	39.5	313	42.5	86	720	202	41.25	50.5	429	783.5	35.5	37	165.75	151.75	55.25	60.5	68	52
2014	S1	3283	3283	Control	3	NA	0	35.7	NA	NA	NA	0	0	1	M	22	Negative	15/05/2012	NA	0	3	0	2426	51.75	55	224.5	79	1062	47.5	911.75	139.5	185	949.5	39.5	41.25	170.75	516.5	92.25	71.5	66	62.25
2014	S1	3286	3286	Intervention	3	41.48	0	36.5	NA	NA	NA	0	0	1	F	33	Positive	15/05/2012	PfPv	2	1	0	2759	829.25	248.25	300	922	5866.5	158.75	1645.25	511	929.5	2857.5	417.75	424.5	731.25	1186.5	481	686.5	558.25	649
2014	S1	3286	3286	Intervention	3	NA	0	36.4	NA	NA	NA	0	0	1	M	3	Negative	15/05/2012	NA	0	3	0	3007	24	31.5	30.25	41	26.5	36	39	35	29	37.75	30.75	32	74	79	46	33.5	42.5	38
2014	S1	3286	3286	Intervention	3	40.77	0	36.5	NA	NA	NA	0	0	1	M	13	Positive	15/05/2012	Pv	1	2	0	2936	156.25	212	292.75	730.5	1005.75	397.75	201	459.75	271.75	237.25	124	118.75	486.75	822	461	404	496.5	565.5
2014	S1	3286	3286	Intervention	3	NA	0	36.5	NA	NA	NA	1	0	1	F	15	Negative	15/05/2012	NA	0	3	0	2988	58	55.5	1532.75	77	459.25	78.5	1481.5	83.5	2993.75	4135.5	72	82.25	375.5	1713.25	72.5	858.25	82.5	68
2014	S1	3290	3290	Intervention	5	NA	1	35.7	NA	NA	NA	1	1	1	M	24	Negative	16/05/2012	NA	0	3	0	2910	163	259	1668	196	1182.25	196	3741.25	364	1833	5011.75	585.5	150.25	299.75	356.5	174.5	261.5	174.5	219.5
2014	S1	3290	3290	Intervention	1	NA	0	37.1	NA	NA	NA	0	0	1	M	10	Negative	16/05/2012	NA	0	3	0	3110	34.5	46	50	71.5	52	57	71.5	59	96.75	261	39	52.25	175.75	167.75	75.75	51	77.5	74
2014	S1	3300	3300	Intervention	4	43.65	0	36	NA	NA	NA	0	0	1	M	12	Positive	10/05/2012	PfPv	2	1	0	2827	248.75	464.5	182.75	719.25	1819	107	13146	332	3635.5	4153.25	102.5	97.75	282	547	262.5	256	314.75	350
2014	S1	3300	3300	Intervention	4	NA	0	36.2	NA	NA	NA	0	0	1	F	10	Negative	10/05/2012	NA	0	3	0	3387	22.25	29.75	25.5	30.5	89	65.75	29	31	187.5	26	29	42.25	172.75	140.75	40	26.5	32	33
2014	S1	3300	3300	Intervention	4	NA	1	36.8	NA	NA	NA	0	0	1	F	60	Negative	10/05/2012	NA	0	3	0	3038	1145.75	40	1057.5	359	5055.75	38	3736.5	181.5	607.5	1449	626.5	199.25	255	1715	162.25	61	47.5	44.5
2014	S1	3300	3300	Intervention	4	NA	0	36.5	NA	NA	NA	1	0	1	F	15	Positive	10/05/2012	PvPm	2	1	0	3062	163	129	422.75	483	119	125.5	198.5	252	537	854.5	80.5	74	265	762.5	272.75	336.75	301.25	336.75
2014	S1	3300	3300	Intervention	4	NA	1	36.8	NA	NA	NA	1	0	1	M	46	Positive	10/05/2012	Pf	1	1	0	2645	126	282	266.5	792.75	638	122.25	8791	589.5	4580	6868.25	94	95.5	334	1086.5	1098.75	429.25	403	463.5
2014	S1	3300	3300	Intervention	4	NA	1	37	NA	NA	NA	0	0	1	M	14	Positive	10/05/2012	PfPm	2	1	0	2747	388.25	928.5	807.5	2110.25	10757.25	469.75	12890.5	619.5	11860	17350	182.25	154.75	1050	1992.25	530	737.5	647.5	713
2014	S1	3300	3300	Intervention	4	42.89	0	36.2	NA	NA	NA	1	0	1	M	4	Positive	10/05/2012	Pv	1	1	0	2933	62.75	83.5	104.5	323.25	59.5	67.25	92	165.75	91.5	102.5	57.75	56	150	372	201.5	130.5	194	230.5
2014	S1	3300	3300	Intervention	4	NA	0	36.2	NA	NA	NA	0	0	1	M	10	Positive	10/05/2012	Pf	1	1	0	2685	471.5	268.75	853.5	878.75	4655	177.25	3973.5	539	3835	7524.75	130.25	141	514	947	477	439.25	515.5	596
2014	S1	3300	3300	Intervention	4	NA	0	36.2	NA	NA	NA	0	0	1	M	12	Positive	10/05/2012	PfPv	2	2	0	2350	338.5	339	7382.5	1611.5	3612.5	377	13199.5	922	10890	11959	166.5	201.5	963	2631	580.5	856	641.5	780.75
2014	S1	3300	3300	Intervention	4	NA	1	36.5	NA	NA	NA	1	0	1	M	3	Positive	10/05/2012	Pf	1	1	0	2955	436.5	515.5	699.5	8623.5	2098	835	25193	675.25	1753.5	3158	375.25	218.5	708.75	1254.75	574.5	642	593	825.5
2014	S1	3308	3308	Intervention	3	NA	0	36.9	NA	NA	NA	1	0	1	F	21	Negative	15/05/2012	NA	0	3	0	3273	40	43.5	42.5	60.25	395.25	76.25	771	53.5	91	650.5	36.5	40	72.75	87.75	61.5	101	60	59.5
2014	S1	3308	3308	Intervention	3	NA	1	36.8	NA	NA	NA	1	0	1	F	8	Positive	15/05/2012	Pf	1	1	0	2728	340	373.5	1286.5	911.5	14435.25	788	7557.5	568.75	11206.75	13164.75	148	160.75	514	911.5	509.25	503.25	603.5	660.5
2014	S1	3308	3308	Intervention	3	40.58	0	37	NA	NA	NA	1	0	1	M	10	Positive	15/05/2012	Pv	1	1	0	3203	50	70.25	83.25	220.25	54.25	53.75	128	131.25	93	81	47	47.5	165.5	275.25	136	108.5	147.5	164.5
2014	S1	3311	3311	Control	9	NA	0	36.1	NA	NA	NA	0	0	1	M	2	Negative	15/05/2012	NA	0	3	0	3271	26.25	39	35	42.5	38.5	34.25	NA	45.25	NA	NA	32	32.75	79.25	57.5	52	34	50	44.5
2014	S1	3311	3311	Control	9	NA	0	36	NA	NA	NA	0	0	1	F	2	Negative	15/05/2012	NA	0	3	0	3020	25.5	35	32.5	41.75	31	31	31	38.25	27.5	NA	30.5	31	57.5	73	50.5	35.25	NA	NA
2014	S1	3311	3311	Control	9	NA	0	36.2	NA	NA	NA	0	0	1	F	20	Negative	15/05/2012	NA	0	3	0	3113	38	32	33	43.5	52	32.5	1175.25	38.5	1534.5	48.25	29.25	244.5	70	65	47	37.5	40	41.5
2014	S1	3316	3316	Intervention	3	NA	0	36.2	NA	NA	NA	1	1	3	M	21	Negative	26/04/2012	NA	0	3	0	2908	668	NA	415	169.5	NA	NA	4799	96	788.25	NA	NA	92.75	230.5	326	NA	686.75	221	NA
2014	S1	3317	3317	Intervention	3	NA	0	36.6	NA	NA	NA	0	0	1	F	24	Negative	26/04/2012	NA	0	4	0	3061	116.25	39.5	135	62	4279	43.25	3340.75	49.5	1007	2533.5	232.75	202.75	170	66	56	128	42.5	45
2014	S1	3317	3317	Intervention	3	NA	0	37	NA	NA	NA	0	0	1	M	10	Negative	26/04/2012	NA	0	4	0	3059	77.75	142	1961.25	294.5	417	56.5	119.25	65.5	269	980.5	64.5	48.25	174.5	377	78	234.75	203.75	95.5
2014	S1	3317	3317	Intervention	3	NA	0	36.8	NA	NA	NA	0	0	1	F	58	Negative	26/04/2012	NA	0	5	0	2744	NA	557.25	1255.75	1066	NA	NA	4432.25	835	4312	6392	9785.75	505.5	3631	1409.5	756.25	1101.5	688.5	785.75
2014	S1	3317	3317	Intervention	3	34.42	0	37	NA	NA	NA	0	0	1	M	20	Positive	26/04/2012	PfPv	2	1	0	2720	338.25	251.25	2351.75	2499.75	305.5	187	7934.5	448.25	6116.25	8878	2046.5	234.25	1006.25	1074	493.5	625.5	541.5	565.75
2014	S1	3317	3317	Intervention	3	NA	0	36.6	NA	NA	NA	0	0	1	F	7	Negative	26/04/2012	NA	0	3	0	2273	27.5	39	39.5	67	79.5	61	238	59	34.25	380	37.5	33.5	163.75	157.5	68.5	42	55	51
2014	S1	3317	3317	Intervention	3	42.68	0	36.4	NA	NA	NA	0	0	1	M	6	Positive	26/04/2012	Pv	1	1	0	2950	102.25	121	172.5	410	127.5	117	258	229.5	232	282.5	91	86	250.5	451	234.5	224.5	291	311
2014	S1	3317	3317	Intervention	3	NA	0	36.8	NA	NA	NA	0	0	1	M	54	Positive	26/04/2012	Pv	1	1	0	2774	299	842	425.5	833	216.25	434.25	15170.25	579.75	7793.75	9646.5	775	926.25	771	1013.5	500.5	5497.5	557.5	552.5
2014	S1	3317	3317	Intervention	3	NA	0	36.6	NA	NA	NA	0	0	1	F	4	Negative	26/04/2012	NA	0	4	0	2983	29	42.25	57.5	53.25	31	36.5	47	91.25	41	180.25	34.5	35.5	132	336.5	642.25	42	50	55
2014	S1	3317	3317	Intervention	1	NA	1	36.8	NA	NA	NA	0	0	1	F	40	Negative	26/04/2012	NA	0	3	0	3157	29	39.5	61.25	56.5	55	50	43	51.75	30.25	131.5	36.5	35	127.25	186.5	182.25	44.5	66	NA
2014	S1	3317	3317	Intervention	3	NA	0	36.8	NA	NA	NA	0	0	1	M	20	Negative	26/04/2012	NA	0	3	0	2623	230	173	6603	172.5	76.25	59.5	NA	121.75	1866.25	10339	59.75	82	239.5	474	234	2576.75	182	112.25
2014	S1	3317	3317	Intervention	1	NA	0	37	NA	NA	NA	0	0	1	F	60	Negative	26/04/2012	NA	0	3	0	2839	33	37.25	30	38.5	32	30	NA	38.75	37	NA	NA	44	110	108.5	43.5	35.75	NA	NA
2014	S1	3317	3317	Intervention	1	NA	0	36.8	NA	NA	NA	0	0	1	F	60	Negative	26/04/2012	NA	0	3	0	2355	37.5	33.5	38	45	84.25	48.5	79	50	1550	1448.75	45.5	NA	118	129.5	45.75	35.5	41.5	NA
2014	S1	3317	3317	Intervention	3	NA	0	36.6	NA	NA	NA	0	0	1	F	35	Negative	26/04/2012	NA	0	3	0	2148	NA	NA	NA	450	NA	41.5	NA	108.5	1759.5	NA	112	79.25	186	240.25	57	54.5	NA	NA
2014	S1	3317	3317	Intervention	3	NA	0	36.5	NA	NA	NA	0	0	1	F	14	Negative	26/04/2012	NA	0	3	0	2193	212.25	2091.5	728.5	1977	545	49.5	5593.75	199.5	20089	22791.5	62.25	780.5	459	711	92.75	17017.25	70.5	77
2014	S1	3317	3317	Intervention	3	NA	0	36.5	NA	NA	NA	0	0	1	F	50	Negative	26/04/2012	NA	0	4	0	3151	562	59	82	278.75	295.5	208.75	2307	84.75	1742.5	3447	733.5	526.5	250.75	105.75	58	447	56	49
2014	S1	3317	3317	Intervention	3	NA	0	36.7	NA	NA	NA	0	0	1	M	10	Negative	26/04/2012	NA	0	4	0	3157	31	33	29	40	26.5	31	48.5	38	191.25	90.5	31	32.5	178	118.75	46	31.75	43	39
2014	S1	3320	3320	Control	3	42.43	1	36.4	NA	NA	NA	1	0	1	F	7	Positive	26/04/2012	PfPvPm	2	1	0	2795	114.5	134	172	466	85.25	107.75	111	238.5	228	145.5	99.5	94.75	231.25	364.75	249	244.25	314	301
2014	S1	3320	3320	Control	3	NA	1	36.2	NA	NA	NA	0	0	1	F	55	Negative	26/04/2012	NA	0	3	0	3015	1450	268.5	1369	NA	1466.5	NA	1592	143	94	665.5	1766	NA	985.75	600	NA	653	NA	NA
2014	S1	3320	3320	Control	3	42.96	1	35.9	NA	NA	NA	0	0	1	F	22	Positive	26/04/2012	Pv	1	1	0	2708	659.5	133	7168	525.25	990	199.75	5928.75	357.5	777.25	1229.25	620.25	319	552	478.25	277.5	275.25	305.25	324.75
2014	S1	3320	3320	Control	3	NA	1	36.9	NA	NA	NA	0	0	1	M	5	Negative	26/04/2012	NA	0	3	0	2948	28	36	42	45.5	30	31.75	41	47	540	52.75	34.25	39	64.5	70	54.5	37	45.25	50.5
2014	S1	3324	3324	Control	2	NA	0	36.7	NA	NA	NA	0	0	1	F	17	Positive	25/04/2012	Pv	1	1	0	2693	497.25	202	434.25	787	8432.25	198.5	1195	392	266	1042.75	188.5	132.5	633.5	832.25	395.25	589	509.25	512
2014	S1	3324	3324	Control	2	42.51	0	36.8	NA	NA	NA	0	0	1	F	4	Positive	25/04/2012	Pv	1	1	0	2057	188	226.5	284	804	174.75	196.25	201.5	632.5	394	545.75	161.5	147.25	478	NA	461.25	NA	755.75	670.75
2014	S1	3324	3324	Control	2	43.18	0	35.9	NA	NA	NA	0	0	1	M	20	Positive	25/04/2012	Pf	1	1	0	2897	1586	1512	8760.5	3314	10312.5	1084	28070.5	902.25	18011.75	24272	350	180	1575.75	3364	694.75	710.5	773.25	787.25
2014	S1	3324	3324	Control	2	39.68	0	37	NA	NA	NA	0	0	1	M	21	Positive	25/04/2012	Pf	1	1	0	2836	1356	401.5	394.75	1222	1018.75	944.5	13865	440.75	8047	9644	409	291.75	1032	1177.25	389.5	1056.75	622	495.25
2014	S1	3324	3324	Control	2	NA	0	35.3	NA	NA	NA	0	0	1	M	38	Positive	25/04/2012	Pm	1	1	0	1715	888.5	1311	397.75	1153	352.5	256	5001.75	NA	12316.5	13303.5	265	257.5	704.75	1275	466	12043	979	879.25
2014	S1	3324	3324	Control	2	44.81	0	36.1	NA	NA	NA	0	0	1	M	66	Positive	25/04/2012	Pv	1	1	0	2842	986	150	2652.5	748	791.75	764.5	10832.25	279.5	3219	2672.75	471	510	3167.25	929.5	262	1738.5	313	342.25
2014	S1	3324	3324	Control	2	44.52	0	36.3	NA	NA	NA	0	0	1	M	15	Positive	25/04/2012	PfPvPmPo	2	1	0	3046	315.5	288.5	179.5	455.5	1735.75	298	163	315.25	1106.75	1298.75	124	120	512.5	635	277.25	665.25	353	339.25
2014	S1	3324	3324	Control	2	NA	0	37	NA	NA	NA	0	0	1	M	6	Positive	25/04/2012	Pv	1	1	0	3076	105.75	147.25	170.5	414.75	715.75	514.5	383.25	278	211.75	319	109.25	104.25	635	568	253.75	250.5	375.75	297
2014	S1	3325	3325	Control	2	NA	1	36.5	NA	NA	NA	0	1	1	M	30	Negative	24/04/2012	NA	0	3	0	2318	216.5	47.5	216.25	360	4705	103.25	5782.5	72.5	1734	2432.75	285.5	711.75	411.5	343.75	61	4124.5	56.75	57
2014	S1	3325	3325	Control	2	NA	1	37.2	NA	NA	NA	0	0	1	F	6	Negative	24/04/2012	NA	0	3	0	2969	25.25	34.5	33	41.75	79	35.5	74	50.5	48.5	110	32	40.5	72.5	71	44.5	66	41.5	NA
2014	S1	3325	3325	Control	2	NA	1	37	NA	NA	NA	0	0	1	M	41	Negative	24/04/2012	NA	0	3	0	2434	78	358.75	61.5	470.5	199	NA	6123	60	884	NA	43.5	47.5	410.5	413	79	685	NA	NA
2014	S1	3325	3325	Control	2	NA	1	36.5	NA	NA	NA	0	1	1	F	37	Positive	24/04/2012	Pf	1	1	0	2522	5933.5	1348	4264.75	622.5	882	291.5	23140	580	23125.75	27611	158	99.5	577.75	663.5	424.25	382	270.5	279
2014	S1	3325	3325	Control	2	NA	1	36.2	NA	NA	NA	0	0	1	M	10	Negative	24/04/2012	NA	0	3	0	2953	NA	35	30.25	48.5	47	40	660.75	41	1862.5	348.5	33.5	36	57	109	48.25	41	41	NA
2014	S1	3325	3325	Control	2	43.1	0	36.2	NA	NA	NA	0	0	1	F	15	Positive	24/04/2012	Pf	1	1	0	2510	1243	332	618	2232.25	1319.5	490.25	14178.75	509	12330.75	17819.5	176.75	195	879.5	1338.5	447.75	422	554.25	614.5
2014	S1	3325	3325	Control	2	NA	0	36	NA	NA	NA	0	0	1	M	15	Positive	24/04/2012	Pv	1	2	0	2692	723.5	177.25	237.25	858	1341.5	137	1981	295.5	7494.25	8449.5	479.5	669	581.25	730.5	317	370.25	401.5	365.5
2014	S1	3325	3325	Control	2	NA	1	36.9	NA	NA	NA	0	0	2	M	11	Negative	24/04/2012	NA	0	3	0	2339	36	34.5	39	94	38	50	95.25	48.25	159.5	290.75	33.25	41.25	193	197	53.5	38.75	54	NA
2014	S1	3326	3326	Intervention	2	NA	1	36.5	NA	NA	NA	1	0	1	M	3	Negative	24/04/2012	NA	0	4	0	3106	20	26	22	27	21	24	25.75	24.75	21.5	21.5	27.25	25	88	85.5	35	22	27	28.5
2014	S1	3326	3326	Intervention	2	NA	1	37	NA	NA	NA	1	0	1	F	30	Negative	24/04/2012	NA	0	3	0	2709	957.5	62.5	123.5	495	254	87.75	12593.75	209.5	1676	2227.75	120	200.75	169	183	95.75	259.25	217.75	108.5
2014	S1	3326	3326	Intervention	2	NA	1	37.2	NA	NA	NA	0	0	1	M	13	Negative	24/04/2012	NA	0	3	0	2205	55.5	90.25	43	170.75	173.5	42	5089	56.75	5744.25	708.5	34.75	40	187.5	221.5	69.25	53	68.5	NA
2014	S1	3326	3326	Intervention	2	NA	1	37.5	NA	NA	NA	1	1	1	M	30	Negative	24/04/2012	NA	0	4	0	2933	813.5	117.5	57.25	106.5	4432	339.75	775.75	56.75	1947	2219	262.5	146.5	166	146.5	71.75	144.5	140	65.25
2014	S1	3326	3326	Intervention	2	NA	1	37	NA	NA	NA	0	0	1	M	25	Negative	24/04/2012	NA	0	3	0	2823	392.5	75.25	36	219.25	491.25	35.5	2099	76.75	2634.25	3436	446.25	60	110	1391.25	54.75	114.25	52.25	49.5
2014	S1	3326	3326	Intervention	2	NA	1	37	NA	NA	NA	0	0	1	F	5	Negative	24/04/2012	NA	0	5	0	3136	250	122	313	348.25	387.75	102.5	241	270	648.25	1417.25	63	72.75	407	597.25	223.25	182.5	218.25	218.25
2014	S1	3326	3326	Intervention	2	NA	1	37	NA	NA	NA	1	0	1	F	30	Negative	24/04/2012	NA	0	3	0	2547	NA	NA	60.5	NA	NA	NA	15129.5	254.5	NA	NA	NA	NA	162	260	NA	2296	NA	NA
2014	S1	3326	3326	Intervention	2	NA	1	36.5	NA	NA	NA	1	0	1	F	30	Positive	24/04/2012	PfPv	2	1	0	2053	1262.5	193	206.5	796.75	103.75	97.5	3109	284	7784.25	8911.5	164	151.75	583.25	11199	3010.75	238.75	266.5	253
2014	S1	3326	3326	Intervention	2	44.4	1	37	NA	NA	NA	0	0	1	M	8	Positive	24/04/2012	Pv	1	2	0	2928	85.5	105.5	125.5	362.5	181	85.5	126	188.5	459.5	142	85	82	230.5	598	246.25	199.5	242.5	223
2014	S1	3326	3326	Intervention	2	NA	1	37	NA	NA	NA	0	0	1	F	10	Positive	24/04/2012	Pv	1	1	0	2492	116.5	102	134.5	365.75	90.5	98	105.5	203.75	700	156	124	74.5	281.25	438.75	330	196.5	220.75	263
2014	S1	3326	3326	Intervention	2	NA	1	37	NA	NA	NA	1	0	1	M	40	Negative	24/04/2012	NA	0	3	0	2366	NA	NA	NA	2088	NA	NA	NA	NA	NA	NA	NA	NA	1655.75	902	1601.5	NA	NA	NA
2014	S1	3326	3326	Intervention	2	NA	1	37	NA	NA	NA	1	0	1	F	20	Negative	24/04/2012	NA	0	3	0	2899	205	401	45.75	86	42.5	40.5	1210	52.5	1612.75	1756	91.75	89.5	129	116	62.5	617.25	66.5	54
2014	S1	3326	3326	Intervention	2	NA	1	37.2	NA	NA	NA	0	0	2	M	33	Negative	24/04/2012	NA	0	3	0	2636	699.5	74	786.25	121	470	82	NA	61.75	435.25	546.75	2256.5	242	664.75	143.5	65	2003.5	109.5	165.5
2014	S1	3326	3326	Intervention	2	NA	1	37	NA	NA	NA	1	1	1	F	50	Negative	24/04/2012	NA	0	3	0	2960	1028.75	66.5	5037.5	481.5	212.25	149	14732	96.5	7385	6632	947.25	98.25	511.5	5161.75	490	596.5	62	67.5
2014	S1	3326	3326	Intervention	2	NA	1	36	NA	NA	NA	1	1	1	M	33	Negative	24/04/2012	NA	0	3	0	2795	527	1058.25	831.25	741	4404.25	631.5	NA	138	9095	10137	91.5	104.5	381.25	2473.5	473.5	593	55.5	63.25
2014	S1	3326	3326	Intervention	2	NA	1	37	NA	NA	NA	1	1	1	F	45	Negative	24/04/2012	NA	0	4	0	2897	519	69.75	66.75	3074.75	921	50.75	10002	90.5	4476.75	8789.75	1249.25	126	394.25	563	105	1672.25	113.5	70.5
2014	S1	3326	3326	Intervention	2	NA	1	37.5	NA	NA	NA	0	0	1	M	7	Negative	24/04/2012	NA	0	3	0	2914	39	43	44.75	57	53.5	69.75	46.5	54	43	162	52.25	67	338.5	325.5	70.5	83.5	60	65
2014	S1	3331	3331	Intervention	2	NA	1	36.1	NA	NA	NA	0	0	1	F	7	Positive	24/04/2012	Pv	1	1	0	2776	82	121.5	148	365.5	131.25	97.5	104.75	210	124.75	107	79.75	106.25	587.25	698.5	337.5	227	255.25	294
2014	S1	3332	3332	Intervention	2	NA	0	36.2	NA	NA	NA	0	0	1	F	26	Negative	25/04/2012	NA	0	3	0	2717	1873	1418.5	607	884.5	6740.25	155.75	NA	133	10624	11962	72.25	77.75	190	385	111.25	211	109.75	142
2014	S1	3332	3332	Intervention	2	NA	0	36.5	NA	NA	NA	0	0	1	F	26	Negative	25/04/2012	NA	0	3	0	2871	116	97	81.25	78.5	754.25	48	71	103	55	525	284.75	157	350	274.25	68.5	771.25	64	60.5
2014	S1	3332	3332	Intervention	2	NA	1	36.4	NA	NA	NA	1	1	1	M	30	Negative	25/04/2012	NA	0	3	0	3035	256	63.25	352.75	97.75	280	66.5	767	136.5	197	299.5	59.5	73	125.25	228.5	82.25	128.5	205.75	84
2014	S1	3332	3332	Intervention	2	NA	1	37.1	NA	NA	NA	1	0	1	F	30	Negative	25/04/2012	NA	0	3	0	3040	54.5	84.5	101	69.5	34	34	149.75	38.5	58	94.5	35.5	234.5	111.5	55.5	46.5	146.5	47.25	41.25
2014	S1	3332	3332	Intervention	2	NA	1	36.5	NA	NA	NA	1	0	1	F	9	Negative	25/04/2012	NA	0	3	0	3025	53.5	46.5	262	103.5	64	62	223	59	301.75	105.25	43.5	45	118.75	383.25	183.75	76.5	81	79
2014	S1	3332	3332	Intervention	2	NA	1	34.8	NA	NA	NA	1	0	1	M	42	Negative	25/04/2012	NA	0	3	0	3085	206	43.5	41	79.25	177	61	NA	44.25	42.25	182.25	41.5	36.5	73	80.5	50.5	115.5	46.25	52
2014	S1	3332	3332	Intervention	2	NA	1	35	NA	NA	NA	1	1	3	M	32	Negative	25/04/2012	NA	0	3	0	3058	543.25	46	60.25	135.75	926.5	181	456	59.5	222.5	413.25	114.25	40.25	166	112.25	52	102.75	66	49
2014	S1	3332	3332	Intervention	2	NA	0	35.8	NA	NA	NA	0	0	1	F	11	Negative	25/04/2012	NA	0	3	0	2798	34.5	107.5	43.5	211	44	44.5	42.5	49	79.75	524.25	34.75	37.5	152	138	60.5	46.5	78	54.5
2014	S1	3333	3333	Control	2	NA	1	37	NA	NA	NA	0	0	1	F	11	Negative	25/04/2012	NA	0	3	0	2893	41.5	87.5	43	119.5	62	55.5	4498	101.75	1296.75	3457.75	40	67	316.25	253.75	63	82	60.5	67
2014	S1	3333	3333	Control	2	NA	1	37	NA	NA	NA	1	0	1	F	70	Negative	25/04/2012	NA	0	3	0	2586	2532	77	186	856.75	122	42.5	12436.25	76.5	1465.75	1341.25	5378.25	168	860.5	315.25	164.5	367	80.5	76.75
2014	S1	3333	3333	Control	2	NA	1	36.5	NA	NA	NA	0	0	NA	M	12	Negative	25/04/2012	NA	0	4	0	2859	69	149.5	3396.5	149.75	7978.75	234.5	3016.5	44	1420.25	2450.5	36	52.75	96.5	143.75	66.5	40.5	45.5	45.5
2014	S1	3333	3333	Control	2	NA	1	36	NA	NA	NA	0	0	1	F	5	Negative	25/04/2012	NA	0	3	0	3003	48.75	55	62.25	81	52.5	67.5	48.25	75.25	39	85	50.5	55.75	93.5	192.75	82.5	58.5	83.5	83
2014	S1	3333	3333	Control	2	40.9	1	36.5	NA	NA	NA	0	0	1	M	11	Positive	25/04/2012	Pv	1	1	0	2721	138.5	139.5	167.75	449.75	171	120.75	204.5	263.5	167.75	252.75	240.25	88.5	337.75	500	258	463.75	360.25	305
2014	S1	3333	3333	Control	2	NA	1	37	NA	NA	NA	0	0	1	F	35	Negative	25/04/2012	NA	0	3	0	2794	842	55.5	122	104.5	2308.25	196.25	4379.5	189	183.5	2418.25	1522	1133	NA	415.5	87.5	208	32	41.25
2014	S1	3333	3333	Control	2	NA	1	36.5	NA	NA	NA	0	0	1	M	16	Negative	25/04/2012	NA	0	3	0	2989	64.5	62	56	88.5	160.5	91	335.5	76.5	73.5	179.75	55	51.75	149.5	152	83.75	63.75	98.5	83.5
2014	S1	3336	3336	Control	3	NA	0	36	NA	NA	NA	0	0	1	M	31	Negative	25/04/2012	NA	0	4	0	3496	671.25	42	923.75	152.5	300	32.25	1453	47.75	519.25	964.75	536.75	141	177	97.5	44	73.5	34.25	35
2014	S1	3336	3336	Control	3	NA	1	36.1	NA	NA	NA	1	1	2	M	20	Negative	25/04/2012	NA	0	3	0	2955	504	333.5	688.25	63.5	1163.25	121.75	111.75	50.5	60.5	107.75	706	152.5	248.75	172	60.5	558.5	73	59
2014	S1	3336	3336	Control	3	NA	1	36.5	NA	NA	NA	0	0	1	F	70	Negative	25/04/2012	NA	0	4	0	3465	133.5	43	369.5	75.75	245.5	78.25	3201	54	624.5	774.75	157.25	60	287.5	166.5	106	71	57	55.5
2014	S1	3336	3336	Control	3	NA	1	36.4	NA	NA	NA	0	0	2	M	33	Negative	25/04/2012	NA	0	3	0	2669	900	55.5	120	505.75	3505.5	490.75	1905.5	100.25	4594.25	5234.5	420.5	285.5	314.25	737	98.5	2094	104.25	72.25
2014	S1	3336	3336	Control	3	NA	0	33	NA	NA	NA	0	0	1	F	25	Negative	25/04/2012	NA	0	3	0	3153	658.75	436.25	1103.5	109	202	95	4679.75	88	548	1530.75	764	111.75	379	175.75	85	614.25	196.75	91.5
2014	S1	3336	3336	Control	3	NA	1	36.2	NA	NA	NA	0	0	1	M	30	Negative	25/04/2012	NA	0	4	0	3178	44.5	86.5	52	43.75	225.75	49.75	567	39.5	68	129	201	30	98	121.5	48.75	78	52.5	41.5
2014	S1	3336	3336	Control	3	NA	0	36.7	NA	NA	NA	1	0	3	M	13	Negative	25/04/2012	NA	0	3	0	2956	29	37	206.75	46	1680.25	40	84	38.5	60.25	162.5	33.75	32	57.75	66.75	45	54.5	60.75	45
2014	S1	3336	3336	Control	3	NA	1	37.2	NA	NA	NA	0	0	3	F	17	Negative	25/04/2012	NA	0	4	0	3071	151	235.5	417.25	562.5	128.75	202.75	1337.5	385.25	408	572.75	109	182.75	577.5	640	374	854	420.25	425.5
2014	S1	3336	3336	Control	3	NA	0	36.5	NA	NA	NA	0	0	3	F	19	Negative	25/04/2012	NA	0	3	0	3151	37.75	50.75	224.5	529	318.5	60	322.75	66	46.5	112.75	39.5	45.5	116.5	114.75	69.25	56	70.5	72
2014	S1	3336	3336	Control	3	NA	1	36.4	NA	NA	NA	0	0	1	F	11	Negative	25/04/2012	NA	0	4	0	2963	84.5	138.75	177.25	362.5	644.25	288.25	386	239	134.5	227.25	70.25	79	269.25	379.25	244.75	183.5	245.5	284.25
2014	S1	3336	3336	Control	3	38.37	1	36.3	NA	NA	NA	0	0	1	F	11	Positive	25/04/2012	Pf	1	2	0	2604	279	504	227.75	808.5	2958.75	342.5	20331	332.75	8379.25	9684	114.25	125.25	479.5	575.5	299.25	315	418.5	519.5
2014	S1	3336	3336	Control	3	NA	0	35.5	NA	NA	NA	0	0	2	M	27	Negative	25/04/2012	NA	0	3	0	2887	182.5	40.5	185.25	50	2015.75	55.25	811.25	50	91.5	229.5	58.5	55.25	96.5	92	56.5	165.5	75.5	50
2014	S1	3336	3336	Control	3	NA	1	37.1	NA	NA	NA	0	0	2	F	4	Negative	25/04/2012	NA	0	4	0	2565	113.25	160.75	200.5	419.5	113.25	117.5	125.25	298.75	132.5	180.75	80.75	99	289	469.25	315.25	249.25	326.5	317.75
2014	S1	3336	3336	Control	3	NA	1	36.8	NA	NA	NA	1	1	1	F	30	Negative	25/04/2012	NA	0	3	0	3001	330.5	1382.5	788.5	848.5	524.75	79.5	1665.25	129	887.5	3878.5	110.5	104	352	264	115.5	586.75	281.75	121.75
2014	S1	3341	3341	Intervention	2	42.77	0	37.1	NA	NA	NA	1	0	1	F	8	Positive	25/04/2012	Pf	1	1	0	2723	124.75	269.5	3494	724.5	229.75	170.5	12129.5	351	625	3457.25	109.5	130.25	482.75	727.75	278.75	257.75	366	484.5
2014	S1	3341	3341	Intervention	2	NA	1	36	NA	NA	NA	1	0	2	M	7	Positive	25/04/2012	Pv	1	1	0	2743	94.5	106.5	135.5	309.75	186.5	126.75	675.5	209	116.5	163	78	82	302	493	569.5	185	277.25	233.5
2014	S1	3341	3341	Intervention	2	NA	1	36.5	NA	NA	NA	1	0	1	M	4	Negative	25/04/2012	NA	0	3	0	2419	187.25	188	450	1894.25	8230.5	628	19428	299.75	7135	15568	57.75	73	227.25	430.25	114	101.25	252.75	118
2014	S1	3341	3341	Intervention	2	32.8	0	36.8	NA	NA	NA	0	0	1	F	2	Positive	25/04/2012	Pf	1	1	0	2811	178.75	252	254	1400.25	1727	204.75	3920.75	515.25	5691.5	17758.5	114.75	170.75	436.75	800.75	334.25	362.25	643	506.25
2014	S1	3341	3341	Intervention	2	42.6	0	37.2	NA	NA	NA	0	0	1	F	26	Positive	25/04/2012	Pv	1	1	0	2750	925.5	134.5	211	974.5	557.75	271	12206	323.25	6589.75	7160.25	770	90	499.5	2721	1260.75	389	305	305.5
2014	S1	3341	3341	Intervention	2	NA	0	37	NA	NA	NA	1	0	1	M	13	Positive	25/04/2012	Pv	1	1	0	2654	120.5	166.25	187.75	736.5	630.5	119	1398.75	303.5	9150.5	6827.75	123.5	109	662	1455	401	298.25	332.5	390
2014	S1	3341	3341	Intervention	2	NA	0	36.4	NA	NA	NA	1	0	1	M	11	Negative	25/04/2012	NA	0	3	0	2960	69.5	61	549.5	724.75	748.25	87	9824.5	382.75	973.75	1740.5	46	109.75	262.75	613.75	96.75	180	243.25	125
2014	S1	3341	3341	Intervention	2	NA	1	36.7	NA	NA	NA	1	1	1	M	20	Negative	25/04/2012	NA	0	3	0	2820	879.25	77.5	894.5	312.25	1852.5	99.5	7532	96	2814.75	5226	49	180.5	146.5	1690	179.25	690.75	52	55.5
2014	S1	3341	3341	Intervention	NA	39.65	0	37.2	NA	NA	NA	NA	NA	NA	M	12	Positive	25/04/2012	PfPo	2	1	0	2693	209.5	178	321	2172.75	3568.75	274.75	12047.5	441	8215	15794.5	101	124	835.5	906	312.5	290	317.5	357.75
2014	S1	3341	3341	Intervention	2	NA	0	37.1	NA	NA	NA	1	0	1	F	18	Negative	25/04/2012	NA	0	3	0	3039	75.25	355	77.5	94.5	2246.5	72.75	1474.5	69.25	197.25	359.5	41.5	125	113.5	188.5	75	112.25	192	77
2014	S1	3341	3341	Intervention	2	41.2	1	36.4	NA	NA	NA	1	0	1	M	3	Positive	25/04/2012	Pv	1	2	0	2841	83.5	110.5	132	332	119.25	102.75	87.5	181.5	119	131.75	77	78.25	673.25	655.5	190.5	224.75	256.75	227.75
2014	S1	3341	3341	Intervention	2	42.73	0	36.5	NA	NA	NA	1	0	1	F	16	Positive	25/04/2012	PfPv	2	2	0	2742	2443	844.5	2943	1670.5	2508	530.25	26140.25	649.75	3759.25	25344.5	778.75	190.5	936.5	2248	516.5	1050.25	981	869.75
2014	S1	3341	3341	Intervention	2	43.9	0	36.5	NA	NA	NA	0	0	1	F	40	Positive	25/04/2012	Pv	1	1	0	2633	3143.25	183	265.75	613.5	305	183.5	8226	356.5	2650.5	6698.5	628.5	312.25	993	513.75	280.5	658	308.25	314
2014	S1	3344	3344	Intervention	3	43.6	0	36.5	NA	NA	NA	1	1	1	M	13	Positive	26/04/2012	Pf	1	1	0	3257	84.5	100.25	126.5	341.75	71	101.5	150	171	94.75	335.75	81.5	76.5	222.5	291.25	178.5	154.5	220	211.5
2014	S1	3344	3344	Intervention	3	NA	0	36	NA	NA	NA	0	0	1	F	5	Negative	26/04/2012	NA	0	3	0	3160	30.5	41.5	40	56.5	41	41.5	35	56.5	37.5	206.5	35.5	42.5	117.5	143	67.5	41.5	54.25	58
2014	S1	3344	3344	Intervention	3	NA	0	36	NA	NA	NA	0	0	1	F	3	Negative	26/04/2012	NA	0	3	0	3312	38.5	41	41.5	50	31	39	57.5	82.25	33	36.75	33.5	34.5	143.75	146.25	59	40.25	50.75	54.25
2014	S1	3344	3344	Intervention	2	NA	0	36	NA	NA	NA	0	0	1	M	3	Negative	26/04/2012	NA	0	3	0	3300	38	55.5	55.75	79.5	73.5	67	51.25	77	428.75	43.25	40.5	63	308.5	292	81.25	66.25	142.5	79.5
2014	S1	3355	3355	Intervention	2	NA	0	36.8	NA	NA	NA	0	0	1	M	27	Negative	24/04/2012	NA	0	3	0	2931	42.5	44.5	514.5	228.5	75.5	65.5	731	56	1004.25	349.75	38	73.5	155.75	238.25	56.5	268	48.5	52.5
2014	S1	3355	3355	Intervention	2	NA	0	36.7	NA	NA	NA	0	0	1	M	8	Positive	24/04/2012	Pv	1	2	0	3168	82.5	99	179	276	69.75	78	1088.75	171.75	84.75	108.5	72	74	177.5	295	164.5	143	201.5	180
2014	S1	3355	3355	Intervention	2	NA	1	36.8	NA	NA	NA	0	0	1	F	4	Negative	24/04/2012	NA	0	3	0	3159	30.5	39	40.5	48.5	42.5	43.5	48.5	49	31.5	52.5	35	37	89.5	114	56	38	47.5	52
2014	S1	3355	3355	Intervention	2	NA	0	36.7	NA	NA	NA	0	0	1	F	15	Negative	24/04/2012	NA	0	3	0	2935	28.5	40.75	40.5	148.5	896.75	181	1129.5	47.5	847.5	NA	34	36	135.5	82.5	44	31.75	35.75	39.5
2014	S1	3355	3355	Intervention	2	NA	0	37	NA	NA	NA	0	0	1	F	40	Positive	24/04/2012	Pf	1	3	0	2509	912.5	451	116.25	1567.25	1163	292	23730.25	190.5	6688.5	13523.25	945.5	414.5	383.5	386.75	255	6637.25	102	104
2014	S1	3355	3355	Intervention	2	NA	1	37.4	NA	NA	NA	0	0	1	M	6	Negative	24/04/2012	NA	0	3	0	3993	31.5	44.5	48	59.5	87.5	65	41.5	62.75	34.5	77.5	43	40.75	65.5	90.25	71.25	48	57.5	67.25
2014	S1	3355	3355	Intervention	2	NA	0	36.8	NA	NA	NA	0	0	1	F	10	Negative	24/04/2012	NA	0	3	0	3076	34.5	48	60.5	126	39	44.5	45.5	74	38	65.5	42.25	45	109.5	130	150.25	55	68	64.5
2014	S1	3355	3355	Intervention	2	NA	0	36.8	NA	NA	NA	0	0	1	M	17	Negative	24/04/2012	NA	0	3	0	3098	39	91.75	45.5	207.5	36.75	41	292.75	56.5	43	647	34.5	433	120.5	105.25	65.75	567.5	128	67.5
2014	S1	3355	3355	Intervention	2	NA	0	37	NA	NA	NA	0	0	1	M	28	Negative	24/04/2012	NA	0	3	0	2747	723	84	52.5	198.5	591.25	41.5	1596.75	72	1192.5	1107.75	326	78.75	118.75	339.75	56.25	249.25	60	54
2014	S1	3357	3357	Intervention	2	NA	1	35.8	NA	NA	NA	0	0	1	F	76	Negative	24/04/2012	NA	0	3	0	2299	820	78.25	781.25	791.5	929.5	429.25	9745.5	98.25	1863.25	1923.5	74.75	92	91	178.5	103.5	138	62	59.75
2014	S1	3357	3357	Intervention	2	NA	0	36.2	NA	NA	NA	0	0	2	F	11	Negative	24/04/2012	NA	0	3	0	2485	31.5	95.5	1003.5	559.75	1043	54.5	1436.5	68.75	2195	4497	37.25	37.5	60	86.5	54	42.25	51.5	50
2014	S1	3357	3357	Intervention	2	NA	0	34.9	NA	NA	NA	0	0	1	F	13	Negative	24/04/2012	NA	0	3	0	2803	34.25	37.75	35	58	91	61.5	116.5	47.75	91	222.5	37.5	35.5	110.75	181.75	57.75	47	46.5	44.25
2014	S1	3357	3357	Intervention	2	NA	1	36.5	NA	NA	NA	0	0	1	M	11	Negative	24/04/2012	NA	0	3	0	3404	28.5	43.5	37.5	51.5	31.75	36	405	52.5	52	79	31.75	34.5	59.5	75	54.5	39	61	48.5
2014	S1	3357	3357	Intervention	2	NA	1	37.9	NA	NA	NA	0	0	1	M	9	Negative	24/04/2012	NA	0	3	0	3443	33	49	53.5	73.25	34.75	44	56	68.5	35	55.75	40	45	100.75	113.5	76	64.25	90.5	79
2014	S1	3357	3357	Intervention	2	NA	0	37	NA	NA	NA	0	0	1	M	9	Negative	24/04/2012	NA	0	3	0	2875	34.5	50.25	NA	112	37.25	55.5	39.5	71	39.5	585.25	38.5	38.5	146.5	214.5	78.5	58.25	NA	NA
2014	S1	3357	3357	Intervention	2	NA	0	35.8	NA	NA	NA	0	0	1	M	70	Negative	24/04/2012	NA	0	3	0	3004	150.25	52	198.25	89.75	720.5	282.25	6905	105.5	1445.5	2737.5	189.5	98.5	120.5	98.75	95	335.25	100	105.5
2014	S1	3357	3357	Intervention	2	NA	0	36.2	NA	NA	NA	0	0	1	F	10	Negative	24/04/2012	NA	0	3	0	2681	34.5	94.5	732.5	81.5	2483.5	983.5	1916	114	129	1495	35.75	40.5	93	920.25	63.25	46.5	69.75	59.5
2014	S1	3366	3366	Control	4	NA	0	36.5	NA	NA	NA	0	0	1	M	25	Negative	13/05/2012	NA	0	5	0	2963	690.5	733	1816.75	1410	477.25	299.25	11644.75	643.25	1028	5009.5	518.5	267	617	836.5	679	958	500.75	595.5
2014	S1	3366	3366	Control	4	NA	0	36.5	NA	NA	NA	0	0	1	F	3	Negative	13/05/2012	NA	0	3	0	3269	25	32.5	32	76.25	26.5	33.75	28.5	38	28.5	29	29.5	30.5	125.5	124.75	45	34.5	41.75	43
2014	S1	3366	3366	Control	4	NA	0	36.5	NA	NA	NA	0	0	1	F	2	Negative	13/05/2012	NA	0	3	0	3188	21	29	25.5	35.5	31	33	30	32.75	25	28	29	28.5	39	57.5	36.75	29.5	31.5	34.75
2014	S1	3366	3366	Control	4	NA	0	36.5	NA	NA	NA	0	0	1	F	12	Negative	13/05/2012	NA	0	3	0	2643	173.75	75.5	1909.5	276	783.5	116	2511.75	167.5	2926.5	4849	42.5	155.5	98.5	673.75	75.25	2529.5	72	68.5
2014	S1	3366	3366	Control	4	NA	0	36.5	NA	NA	NA	0	0	1	F	25	Negative	13/05/2012	NA	0	5	0	2988	117.5	608	305.25	1508.25	619.5	108.5	3685	440	2007	2072.25	67	83	270	1124.75	815.75	416.75	287	342
2014	S1	3366	3366	Control	4	NA	0	36.4	NA	NA	NA	0	0	1	F	24	Negative	13/05/2012	NA	0	4	0	2983	617.5	218.25	161	336	195.25	136	11947	317	159.5	2260	437	376.5	377.25	350.25	246	508.5	225.5	257.25
2014	S1	3366	3366	Control	4	NA	0	36.5	NA	NA	NA	0	0	NA	F	14	Negative	13/05/2012	NA	0	3	0	3473	58	46.25	469	121	132	37	419.75	53.5	238.25	405.25	34.75	44	87.5	111	47	162.75	44	47
2014	S1	3366	3366	Control	4	NA	0	36.5	NA	NA	NA	0	0	1	F	11	Negative	13/05/2012	NA	0	3	0	3189	27	34	31.5	63.5	27	32.25	169	44.25	34.5	737.75	30	35.25	195.5	195.5	55.25	36.5	38	40
2014	S1	3366	3366	Control	4	NA	0	36.5	NA	NA	NA	0	0	1	F	6	Negative	13/05/2012	NA	0	3	0	2842	23.75	32	28.75	40.25	31	30.25	1154.5	45	172.25	417	29.25	30	73.5	80	41.5	33.5	36.25	36
2014	S1	3366	3366	Control	4	NA	0	36.5	NA	NA	NA	0	0	1	F	16	Negative	13/05/2012	NA	0	3	0	2780	410.75	79.5	327.25	1984.5	242.25	47	6297.5	126	1895	1981	193.5	75.5	171	6009.25	109.25	189.25	70.5	76.5
2014	S1	3366	3366	Control	4	NA	0	36.5	NA	NA	NA	0	0	NA	F	9	Negative	13/05/2012	NA	0	3	0	3191	40.5	39.25	43.5	60.5	57.5	41	49.5	82.75	216.75	265	36.5	44	103	105.5	59.5	75	57.5	54
2014	S1	3366	3366	Control	4	NA	0	36.5	NA	NA	NA	0	0	1	F	7	Negative	13/05/2012	NA	0	3	0	3009	32.5	47	71.5	56	55.5	40.5	100.25	114.5	45.75	185.75	57.5	49.5	309.25	259	56.75	43	52.5	49
2014	S1	3366	3366	Control	4	NA	0	36.5	NA	NA	NA	0	0	1	F	5	Negative	13/05/2012	NA	0	4	0	2623	77.5	258.25	148	287.75	467.75	72.75	170	241.75	215	1091.75	60.5	58.25	208.5	364.5	214	156	196.5	248
2014	S1	3368	3368	Intervention	4	NA	0	36.7	NA	NA	NA	1	0	1	M	10	Negative	9/05/2012	NA	0	4	0	3011	42.25	66	135.75	176.25	40.5	50	56	129.5	53.5	54.25	43	43.5	166.75	226.75	132.5	105	118.5	135.5
2014	S1	3368	3368	Intervention	4	NA	1	37	NA	NA	NA	1	0	1	F	20	Negative	9/05/2012	NA	0	4	0	2723	68	262	295.5	384.25	434.75	78.5	1387	291	544.25	847.75	57.5	354.75	268.25	960.75	266.75	572.25	222.75	293
2014	S1	3368	3368	Intervention	4	NA	1	36.9	NA	NA	NA	1	0	3	F	18	Negative	9/05/2012	NA	0	3	0	2326	37	43	41	78	45.5	38	299	103.25	117	695.5	37	43.5	73.5	80.25	58	143	57	51.5
2014	S1	3368	3368	Intervention	4	NA	1	36.5	NA	NA	NA	1	0	3	M	20	Negative	9/05/2012	NA	0	3	0	2584	120.75	40.75	58	80.75	4081	221.75	378.75	55.75	338.5	4264.5	77.25	97	118.75	117.5	56	166.5	52	47
2014	S1	3368	3368	Intervention	4	NA	1	37.1	NA	NA	NA	1	0	1	F	12	Negative	9/05/2012	NA	0	3	0	2709	27	34	30.5	39	27.5	34.5	28.5	38.5	28	31	32.5	32	101	108.75	46	35	42	42
2014	S1	3368	3368	Intervention	4	NA	1	37.2	NA	NA	NA	1	0	1	F	6	Negative	9/05/2012	NA	0	3	0	2899	19.75	25.5	21.25	26.25	22.5	25	21.5	26.25	23	21.5	25.5	24.5	30.5	35	34.5	21.5	26.5	27
2014	S1	3368	3368	Intervention	4	NA	1	37	NA	NA	NA	1	0	1	M	8	Negative	9/05/2012	NA	0	3	0	3005	24.5	31.5	28.5	42	28	32.5	27.5	36	26.5	28	36	30.5	91.75	96.75	44	32.5	37	39.5
2014	S1	3368	3368	Intervention	4	NA	1	36.5	NA	NA	NA	1	0	1	M	4	Negative	9/05/2012	NA	0	3	0	2885	18	20.25	16.25	21.25	21	21.5	19.5	18	20.75	18	23.5	23	19	27	25.75	17.5	20.5	22
2014	S1	3368	3368	Intervention	4	NA	0	36.8	NA	NA	NA	1	0	NA	F	23	Negative	9/05/2012	NA	0	3	0	2446	787	68.5	75	155.5	486.25	67.5	2988.75	91.5	421.75	652	104	56	252.5	285	98	95.25	113	98.75
2014	S1	3368	3368	Intervention	4	NA	1	37	NA	NA	NA	1	0	1	F	7	Negative	9/05/2012	NA	0	3	0	2659	22	30.5	26	32.5	24	28.5	25	32	24	25.25	27	25.5	133.5	133	38	26	33.5	33.5
2014	S1	3368	3368	Intervention	4	NA	1	37	NA	NA	NA	1	0	1	F	8	Negative	9/05/2012	NA	0	4	0	2982	82.5	120.5	153.5	318.25	122	103.5	88.5	240.25	110	133.5	55.5	67.5	614.5	632.25	226.25	175	206.75	242.25
2014	S1	3368	3368	Intervention	4	NA	0	36.8	NA	NA	NA	1	1	1	M	28	Negative	9/05/2012	NA	0	3	0	2888	410.5	45.25	91.5	71.5	4900.25	70.5	1167	74.5	455	764	159.75	213.5	103	84	68	1055	58	54
2014	S1	3368	3368	Intervention	4	NA	1	36.4	NA	NA	NA	1	0	1	F	5	Negative	9/05/2012	NA	0	3	0	3519	25	26.5	23	27	113.25	26	33	26	28.75	30.5	27.5	30	38.25	43	33.5	37.5	27	27.5
2014	S1	3368	3368	Intervention	4	NA	1	37	NA	NA	NA	1	0	1	M	66	Negative	9/05/2012	NA	0	4	0	2678	64.75	26.75	44.75	44.5	34	26.5	27.25	28.5	33	76.25	31	25.5	29.25	68.75	35	311.25	29.5	29.5
2014	S1	3368	3368	Intervention	4	NA	1	36.6	NA	NA	NA	1	0	1	F	61	Negative	9/05/2012	NA	0	5	0	2883	984.5	259.75	2274.5	633.5	430	164.25	1116.5	466	346.5	592.5	382	228.75	580	865.75	469	1256.75	445.5	498
2014	S1	3368	3368	Intervention	4	NA	1	37	NA	NA	NA	0	0	1	F	27	Negative	9/05/2012	NA	0	3	0	2738	148	53.5	69.5	46	198.75	38	198	46	709	1043	728	1502.75	549.75	115.5	52	68	51.5	46.5
2014	S1	3368	3368	Intervention	4	NA	1	36.5	NA	NA	NA	1	0	1	M	4	Negative	9/05/2012	NA	0	3	0	3085	50.5	28.25	26	30.25	29.5	28.5	29.75	29	59.75	80.25	78.5	120.25	93.5	49	34.25	28.25	30.5	31.5
2014	S1	3368	3368	Intervention	1	NA	0	37	NA	NA	NA	0	0	1	F	27	Negative	9/05/2012	NA	0	3	0	2847	20.5	25	21.5	31.5	861	405.5	22	27	22.25	29	25.5	25.5	68	41	32.5	22.75	28	27.5
2014	S1	3371	3371	Control	3	NA	1	36.8	NA	NA	NA	0	0	1	M	30	Negative	15/05/2012	NA	0	3	0	2893	484.25	60.25	50.5	68.5	100.25	50.5	292	69	202	279.5	44.5	44	113.75	150	75	104	69.5	67.25
2014	S1	3378	3378	Intervention	4	NA	0	36.5	NA	NA	NA	0	0	1	M	13	Positive	9/05/2012	Pv	1	1	0	3043	907	111.5	384.25	437.5	1549.25	87	441.5	225.5	2742	1887	72.75	76.5	508.5	593.5	191.75	186.75	222.5	245.5
2014	S1	3383	3383	Intervention	4	NA	0	36	NA	NA	NA	1	0	2	F	7	Negative	10/05/2012	NA	0	4	0	3067	108.75	NA	NA	517.75	639	NA	125.25	NA	171	316.25	57	69.5	NA	483.25	NA	NA	NA	NA
2014	S1	3383	3383	Intervention	4	NA	1	36.2	NA	NA	NA	0	0	1	M	21	Negative	10/05/2012	NA	0	3	0	2738	6125.75	818.75	1912.75	663.75	338.75	60.5	5374	165.75	4268.25	6486.75	164.25	617.5	352.25	1159.5	136.5	6094.5	94	107.5
2014	S1	3383	3383	Intervention	4	NA	1	35.7	NA	NA	NA	1	0	1	F	2	Negative	10/05/2012	NA	0	3	0	2932	34	35.5	34.5	41	30	34.5	34	42.5	34	39.5	31	31	46	55.75	49.5	42.5	42	41
2014	S1	3385	3385	Control	4	NA	1	36.8	NA	NA	NA	1	1	1	M	29	Negative	10/05/2012	NA	0	3	0	2554	927	57.5	179.5	293.25	502	46	10382.75	68.75	2410.5	2244.75	236.5	49.5	128.5	106.5	62	273.75	56.5	269.25
2014	S1	3388	3388	Intervention	4	NA	1	36.8	NA	NA	NA	0	0	1	F	29	Negative	13/05/2012	NA	0	3	0	2984	492	1231	77.75	1934.25	1141.25	106	15077.75	167.25	1636.5	5361	530.75	253.25	280	388.75	125	1413.5	103	96
2014	S1	3388	3388	Intervention	4	NA	0	36.2	NA	NA	NA	0	0	1	F	6	Negative	13/05/2012	NA	0	4	0	2857	112.25	184	243.5	543	206	155.5	114.75	341.75	154.25	151.5	82.5	90.5	284	530.5	372	255.75	321.5	393.25
2014	S1	3389	3389	Control	4	41.22	0	36.1	NA	NA	NA	1	0	1	M	13	Positive	13/05/2012	PfPvPm	2	1	0	2968	251.5	199	255.75	762	407.5	1423	21865.75	383.5	1416	1314	113	110.5	395.5	767.5	329.25	576	568.25	401
2014	S1	3389	3389	Control	4	NA	0	36.2	NA	NA	NA	0	0	1	F	27	Negative	13/05/2012	NA	0	3	0	2750	87.25	45.5	44.5	52	934	124	795.5	105.25	491.5	624.75	61	57.5	320	708	69.5	392.75	56	49.5
2014	S1	3390	3390	Control	4	NA	0	36.5	NA	NA	NA	0	0	1	F	7	Negative	10/05/2012	NA	0	3	0	3114	37	43.5	45	57	40	46	44	55.5	33.25	55.75	57	50.5	91.5	133	69.5	53.5	72	62.75
2014	S1	3390	3390	Control	4	NA	1	36.6	NA	NA	NA	1	0	1	F	23	Negative	10/05/2012	NA	0	4	0	2494	543.5	252.25	1224	3021.75	4523.25	220.5	8406.75	673.75	3606.5	7967.5	750	823.75	815.5	7102	2273.5	2335.5	474.5	526.75
2014	S1	3390	3390	Control	4	NA	0	36.1	NA	NA	NA	0	0	1	F	7	Positive	10/05/2012	Pv	1	1	0	3132	86.5	118.25	149	370.75	71.75	91.5	187	218.5	114.5	110.75	85.5	95	235.25	362	226.5	210.5	241	257.25
2014	S1	3393	3393	Intervention	4	NA	0	36	NA	NA	NA	0	0	1	F	58	Negative	9/05/2012	NA	0	3	0	2524	1874	73.5	5590.5	118.5	3395.5	71	16280.25	113.25	1382	1319	2914	2482.75	1138.25	201.25	106.5	3797.25	105.25	140.25
2014	S1	3393	3393	Intervention	4	NA	0	36.2	NA	NA	NA	0	0	1	M	3	Negative	9/05/2012	NA	0	3	0	3090	25.5	36	34.5	43.5	29.5	34	30	42	26	29.5	30.5	31.25	69.75	68	51	36	65.5	42.25
2014	S1	3395	3395	Intervention	4	NA	1	35.7	NA	NA	NA	1	0	1	F	48	Negative	13/05/2012	NA	0	3	0	2543	283.5	130.25	115.75	533.5	10665.5	516	4444	528.75	6479.75	10806	744.25	408.25	536.75	4906.5	386	618.5	315	162.75
2014	S1	3395	3395	Intervention	4	NA	1	37	NA	NA	NA	1	1	1	F	24	Positive	13/05/2012	Pv	1	3	0	2712	52	46.5	5385.5	228.25	108	44	3513.5	74.5	1342.25	1917.5	66.25	48.25	145.5	435.5	71.75	702.5	65.75	66
2014	S1	3395	3395	Intervention	4	NA	1	36.3	NA	NA	NA	1	0	1	F	30	Negative	13/05/2012	NA	0	3	0	2601	1367.5	130.75	5279.5	1390	276.25	77	9285.5	242.5	2462	12143.25	590.25	870.5	542.5	585.5	120.75	655	129.25	100.75
2014	S1	3395	3395	Intervention	4	29.54	1	39.1	NA	NA	NA	1	0	1	M	6	Positive	13/05/2012	PfPv	2	3	0	2467	6849	66	44.5	138	11713.75	253.5	308.5	175	5078.75	9146	43	55.75	200.5	259.5	67	51	53.5	58
2014	S1	3395	3395	Intervention	4	NA	1	36.2	NA	NA	NA	1	0	1	F	25	Positive	13/05/2012	Pv	1	1	0	2795	1602	2504	293.5	1189.75	2869.25	106.5	4318.75	407.25	3879.5	8055	1515	1580.5	952.75	442	1037.75	454.75	324.5	304
2014	S1	3395	3395	Intervention	4	43.99	1	36.1	NA	NA	NA	1	1	1	M	8	Positive	13/05/2012	Pv	1	2	0	3053	140	152	411	670.5	1028	238.5	5521.75	333.5	3160.75	5317.5	89.75	113.5	463.25	1663.75	361.5	213.75	315.75	284.25
2014	S1	3395	3395	Intervention	4	44.22	1	36.1	NA	NA	NA	1	1	1	F	7	Positive	13/05/2012	Pv	1	1	0	2956	113.5	140	536	455.5	3173.75	171.75	773.75	307.75	954	826	98.75	102	374.25	418.5	213.5	216.75	317	253.5
2014	S1	3395	3395	Intervention	4	NA	1	35.7	NA	NA	NA	1	0	1	F	14	Negative	13/05/2012	NA	0	3	0	2134	1055.5	95.25	4179.75	223.5	7435	161.5	11965	109	3875	5197.5	43.75	54.25	175.5	393.25	82.75	4976.75	82.25	65.5
2014	S1	3395	3395	Intervention	4	NA	1	36.7	NA	NA	NA	1	0	1	F	8	Positive	13/05/2012	Pv	1	3	0	2590	60.5	67	100	127.25	363	134	509	81.25	133	408.25	87	114.25	1091.5	4228	703.5	134.5	104.25	86.75
2014	S1	3395	3395	Intervention	4	NA	1	34.4	NA	NA	NA	1	1	1	M	9	Negative	13/05/2012	NA	0	3	0	2419	157.5	1507	854	797.75	1798.25	600.25	23501.5	198.5	15832.25	17965.75	53.5	339	222.5	680	120	1656.75	94.5	110.5
2014	S1	3395	3395	Intervention	4	NA	1	37	NA	NA	NA	1	1	1	F	2	Negative	13/05/2012	NA	0	3	0	2774	24.5	31.5	29.25	35.5	31	38	26.5	34.25	26	26.5	28	29	39.5	56.5	43	30.5	38.5	40
2014	S1	3395	3395	Intervention	4	33.52	1	36.6	NA	NA	NA	1	1	NA	M	11	Positive	13/05/2012	PfPv	2	3	0	2398	53.75	82.5	100.5	310.25	8831	457	10798.25	121.75	1098.25	2284.5	89.75	55.5	218	8808.75	106.25	97.5	111.75	657.5
2014	S1	3397	3397	Control	4	NA	1	36.7	NA	NA	NA	1	0	1	M	6	Negative	11/05/2012	NA	0	3	0	2550	23	28.5	26	32.5	29	28	30.5	31.5	33	27	29.25	28.25	51.25	60	37.5	25.75	34.5	33.5
2014	S1	3397	3397	Control	4	NA	0	36.9	NA	NA	NA	1	1	1	M	13	Negative	11/05/2012	NA	0	4	0	2821	NA	NA	NA	1997.5	985.75	NA	NA	NA	851.25	1128.25	102.75	110.75	749.5	NA	NA	NA	438	494.25
2014	S1	3397	3397	Control	4	NA	1	36.3	NA	NA	NA	1	0	1	F	45	Negative	11/05/2012	NA	0	4	0	2718	573	NA	NA	1057.75	348.5	174.5	723	607.5	480	679	1141	199	840	1439.75	1431	592.5	482.75	591
2014	S1	3397	3397	Control	4	NA	1	36.5	NA	NA	NA	0	0	1	F	30	Negative	11/05/2012	NA	0	3	0	2752	206.5	67.5	309.75	63	1580.5	62.5	743.75	72	134	3022	240	322	214.5	101.75	57.5	65.75	52.5	49.5
2014	S1	3397	3397	Control	4	NA	1	36.2	NA	NA	NA	1	0	1	M	5	Negative	11/05/2012	NA	0	3	0	2994	18	22.5	17.5	20	23	21.5	20	19.5	21.5	23.5	23	22	21	27.25	27	18	22.5	21.5
2014	S1	3397	3397	Control	4	NA	1	36.8	NA	NA	NA	0	0	1	M	2	Negative	11/05/2012	NA	0	3	0	2500	20	25.5	22.75	28	22	26	22	26.25	20.5	22	27.5	24	28	36	34	23.5	34.5	27.5
2014	S1	3400	3400	Intervention	4	NA	0	36.5	NA	NA	NA	0	0	1	F	33	Negative	9/05/2012	NA	0	3	0	2968	162.25	39.5	54	40.5	87.5	36	388	41.5	107	341	163.5	48	128.5	69.5	43.5	197.75	41.75	41
2014	S1	3400	3400	Intervention	4	37.05	0	36.7	NA	NA	NA	0	0	1	M	13	Positive	9/05/2012	Pf	1	2	0	2823	142.75	210	205.5	715.5	209.5	171	918	390.5	1245	5417.75	115.75	112.25	303.5	440	287.75	317.25	383.5	329
2014	S1	3400	3400	Intervention	4	NA	0	36.5	NA	NA	NA	0	0	1	M	18	Negative	9/05/2012	NA	0	3	0	2676	310.5	176.25	89	307.5	6799.25	581.5	2851	90.5	1237.5	3908.25	270.5	118.75	238.75	237.5	117	142.5	150.5	76.5
2014	S1	3400	3400	Intervention	4	NA	1	36.5	NA	NA	NA	0	0	1	F	11	Negative	9/05/2012	NA	0	3	0	2759	33.5	38.75	36.5	72.5	2217.5	84	82	48	133.75	596.25	46	36	82.5	93.25	55	49.75	100.5	52.25
2014	S1	3400	3400	Intervention	4	NA	1	36.5	NA	NA	NA	0	0	1	F	50	Negative	9/05/2012	NA	0	3	0	2591	448.5	191	1763.5	177.25	83.25	60.25	10656.75	87	2651	2869.25	367.5	138	150	119.25	65.75	147	49	46.5
2014	S1	3400	3400	Intervention	4	NA	0	36.3	NA	NA	NA	0	1	1	M	51	Negative	9/05/2012	NA	0	3	0	2784	523.5	29.5	35	186.5	1823.5	147.5	2730.75	43.25	1105.25	1416.5	143	113.75	147.75	222.75	38.5	424.25	36.5	32
2014	S1	3403	3403	Intervention	4	NA	1	37	NA	NA	NA	0	0	1	F	62	Negative	13/05/2012	NA	0	3	0	2960	989.5	34	60.5	78.25	820.75	31.25	807.5	40.5	228.75	200	570	410.5	345	90	46	447.5	35.5	36.5
2014	S1	3403	3403	Intervention	4	NA	1	36	NA	NA	NA	1	0	1	F	8	Negative	13/05/2012	NA	0	3	0	3268	38.5	34	35	41.5	33.5	34.5	48.5	40	32	37	36	35	89.5	76.5	46.5	38	50	43
2014	S1	3405	3405	Control	4	NA	1	36.3	NA	NA	NA	1	0	1	F	5	Negative	9/05/2012	NA	0	4	0	2816	NA	NA	NA	547	NA	NA	398.5	NA	1388.5	142.75	86.5	89	335.25	581	NA	NA	362.75	373
2014	S1	3405	3405	Control	4	NA	1	36.3	NA	NA	NA	1	1	1	M	2	Negative	9/05/2012	NA	0	3	0	2414	23.25	31.5	28	35.5	28.5	32.5	29	34.25	26	25	30	28.75	39.5	53	39.5	28.5	38.5	36.5
2014	S1	3405	3405	Control	4	NA	1	36.6	NA	NA	NA	1	1	1	M	23	Negative	9/05/2012	NA	0	3	0	2260	485	156.25	89	184.75	834.75	38	1698.25	202.25	210.25	2017.5	377	125.75	285.5	467.5	49.75	462.75	46.5	51
2014	S1	3405	3405	Control	4	NA	1	36.2	NA	NA	NA	1	0	1	M	6	Negative	9/05/2012	NA	0	3	0	2546	42.5	55	63.5	97.25	43	55.5	44	74.5	42.5	82	45.25	49.5	185.25	263.75	86	88	194.25	94.5
2014	S1	3405	3405	Control	4	NA	1	36.9	NA	NA	NA	1	0	NA	F	30	Negative	9/05/2012	NA	0	3	0	3215	77	60.5	25.5	30	45.75	30	304.5	39.5	253	411.5	50.5	31	44.5	47.5	35.5	37.5	31	34.5
2014	S1	3405	3405	Control	4	NA	1	36.1	NA	NA	NA	1	0	1	M	14	Negative	9/05/2012	NA	0	3	0	3390	26.5	36.5	33	42	46.75	43.5	36.5	40	52	58.5	33	33.5	137.5	113.5	46	134.5	50	47
2014	S1	3407	3407	Control	5	40.48	0	36.6	NA	NA	NA	0	0	1	M	12	Positive	27/04/2012	Pv	1	1	0	2933	110.75	133.75	160.5	453.5	95.75	116.25	4365.75	228.25	476.25	431.5	98	96.75	517	591	289.75	251.5	372.5	423
2014	S1	3413	3413	Intervention	5	41.9	0	37	NA	NA	NA	1	1	2	M	11	Positive	27/04/2012	Pv	1	1	0	2677	681.5	370.5	4274	425	17412.5	500.5	1543.5	196	1605.5	5138.5	70	76.5	1462.5	1572	178.5	172.25	238.5	195.25
2014	S1	3413	3413	Intervention	5	32.8	0	37.2	NA	NA	NA	1	0	1	F	40	Positive	27/04/2012	PfPvPm	2	1	0	2610	624.5	1761.75	372	844	2831.75	869.75	11567	361	21165.25	23205	481	NA	489.5	570	259.25	1346.75	316.75	313
2014	S1	3413	3413	Intervention	5	36.5	0	36.6	NA	NA	NA	1	1	1	M	17	Positive	27/04/2012	PfPv	2	1	0	2374	1166.5	3058.25	2264	2415.75	3261	208.25	30239.25	667.25	25336.5	31662.25	153.5	167	791.5	1106.5	420	564	523	484.5
2014	S1	3414	3407	Control	5	NA	1	36.3	NA	NA	NA	1	0	1	M	10	Negative	NA	NA	0	3	0	2593	26	31	30	53.75	27.5	32	1200.5	46	46	154	32.5	31.5	217.5	202.5	44	33.5	48	38
2014	S1	3417	3407	Control	5	NA	0	36	NA	NA	NA	1	0	1	M	4	Negative	NA	NA	0	3	0	3375	21	27.5	22.5	28.5	39.5	29	23	27.5	24.5	21.5	26.25	26	33	41	32.5	25	32	29.25
2014	S1	3418	3415	Control	5	NA	1	36.5	NA	NA	NA	1	1	1	F	14	Negative	NA	NA	0	3	0	2621	516	100.5	130	1353	192	96.25	25325.25	137.5	12870.5	14726.5	65	103.5	439	499	97.5	95	91.5	414.5
2014	S1	3418	3415	Control	5	39.1	1	37	NA	NA	NA	1	1	1	M	32	Positive	NA	Pf	1	1	0	2515	2852	3815.25	10515	3203	20715.75	662.5	29698	505.5	27190.5	30918.5	1239	831	1056.5	2577	535.25	4304	440.5	1630
2014	S1	3419	3423	Intervention	5	42.03	1	36	NA	NA	NA	0	0	1	M	12	Positive	NA	Pv	1	1	0	3061	114	150.5	267.5	469.75	157.25	125.5	486.5	272.5	173.5	247.5	105	277.25	338	864	302	644.25	363.75	322.5
2014	S1	3424	3413	Intervention	5	NA	0	36.4	NA	NA	NA	0	1	3	M	30	Positive	NA	PfPv	2	1	0	2538	1905.5	3869.5	964	8181	4232	472	21959.25	267	18458	20267.5	5888	5999.25	4602.5	1462.5	267	1041	349	342
2014	S1	3425	3425	Control	2	NA	1	35.7	NA	NA	NA	0	0	1	F	9	Negative	26/04/2012	NA	0	3	0	2996	26.5	35.5	34	40	29	34	68.25	40.75	29.5	49.25	30.5	30	62.5	86.25	51.5	33.25	48.5	41
2014	S1	3425	3425	Control	2	44.4	1	36.7	NA	NA	NA	1	1	1	M	20	Positive	26/04/2012	Pv	1	1	0	2829	348	763.75	4064.25	691.75	158.25	122.5	2077	255	666.75	2100.75	203.75	175.5	457.5	519.25	266.75	258.5	326.25	327.75
2014	S1	3425	3425	Control	2	NA	1	36.5	NA	NA	NA	1	0	1	F	45	Negative	26/04/2012	NA	0	4	0	2711	455	229.25	653.75	815	322.75	268.5	2356.25	NA	1059.5	1470.75	145.75	292	773.5	1062.25	NA	2616	443.5	530.25
2014	S1	3432	3432	Control	2	NA	0	36.1	NA	NA	NA	0	0	1	M	2	Negative	29/04/2012	NA	0	3	0	2891	43	59	86	104.5	42	79	52.25	72	51	52.5	68	85.75	485.75	410.75	88.25	81	110	89
2014	S1	3432	3432	Control	2	NA	1	35.7	NA	NA	NA	0	0	1	M	65	Negative	29/04/2012	NA	0	3	0	2560	633.25	220.75	1949.5	363.25	3153.75	302	18836.5	323.5	4360	4692.5	709.75	711.5	620.5	763.5	1138	365.5	399.5	156
2014	S1	3432	3432	Control	2	42.62	0	37.4	NA	NA	NA	0	0	1	M	6	Positive	29/04/2012	Pv	1	1	0	2416	720	250.75	6059.5	1546	1082.5	132.5	23069.75	566.5	12189.25	23686	316.75	161.5	458.25	1604.5	332	456.5	266	288.75
2014	S1	3433	3432	Control	2	NA	1	38.7	NA	NA	NA	0	0	1	M	3	Negative	NA	NA	0	3	0	2705	26.5	33.75	33.5	39.25	120.25	112.25	29	40	29.5	32.5	32	32.5	55	59.25	48	33.5	42.25	42
2014	S1	3433	3432	Control	2	NA	1	36.2	NA	NA	NA	1	0	1	F	16	Negative	NA	NA	0	3	0	2483	1556.75	80	71.75	375	6234	270	2369	134.5	210	9745.25	50.25	53.75	283	329.25	118	116	164.75	106.25
2014	S1	3433	3432	Control	2	38.24	1	36.1	NA	NA	NA	0	0	1	F	10	Positive	NA	Pv	1	2	0	2961	2319.75	141	110.5	458	179.5	150.5	2606.5	201.25	1656.5	4980.75	69.5	86.75	306	496.25	481.75	182	256.25	204.25
2014	S1	3433	3432	Control	2	42.94	1	36	NA	NA	NA	1	1	1	M	60	Positive	NA	Pv	1	3	0	2477	896	63.25	461.75	422.5	95.5	84.5	12860.5	74.5	839.75	770.5	299.25	255	230.25	95	77.25	229	69	66
2014	S1	3435	3435	Control	10	NA	1	37	NA	NA	NA	1	0	1	F	20	Positive	29/04/2012	Pv	1	1	0	2510	138	180	239.75	649.5	1054.75	731.75	5087.75	380	3313	7149	119.75	556.5	607.5	796	317.75	409	493.5	402.75
2014	S1	3435	3435	Control	10	38.2	0	36.7	NA	NA	NA	0	0	1	F	15	Positive	29/04/2012	Pm	1	1	0	2444	1075.75	2357.75	7738.25	487.75	344	422.25	4886	267.5	2812	9081.5	127.5	164.5	983.75	928.5	231.75	523.75	302	305
2014	S1	3435	3435	Control	10	42.03	1	37	NA	NA	NA	1	0	1	M	50	Positive	29/04/2012	Pf	1	1	0	2683	1931	913.75	4121.25	1077	911.75	118.25	18876.5	392.5	7521.75	8355.25	1195.75	147.75	700.75	1119.25	279.25	361.5	426.5	325
2014	S1	3435	3435	Control	10	38.63	1	36.1	NA	NA	NA	1	0	1	M	36	Positive	29/04/2012	Pv	1	1	0	3305	106	144.75	192.75	338.75	176.5	144.75	223.25	308.75	128.5	271.75	101.5	99	313	548.25	506.75	203	364.25	293
2014	S1	3435	3435	Control	10	NA	1	36	NA	NA	NA	0	0	1	F	7	Positive	29/04/2012	Pv	1	1	0	2630	117.75	143.5	180.25	409	321	274	224.75	256.75	99	235	100.5	99.75	834.75	1423	258	229	339	313.75
2014	S1	3435	3435	Control	10	38.3	1	36	NA	NA	NA	1	0	1	M	35	Positive	29/04/2012	Pf	1	1	0	2726	449.5	748.75	433.75	4367.25	4062.5	1129	25910.25	508.5	20512.25	22696	230.75	195.5	1197.75	1842.5	455.5	867.25	1201.5	926.5
2014	S1	3436	3436	Control	10	NA	0	36.3	NA	NA	NA	1	0	1	F	15	Positive	30/04/2012	PfPv	2	1	0	2849	1134.25	831.75	191.75	519.25	4653	281	3179.75	278.75	9372	16963.5	114.5	108.5	410	551.5	250.5	394.5	324	313.5
2014	S1	3436	3436	Control	10	NA	0	37.1	NA	NA	NA	1	0	1	M	25	Positive	30/04/2012	Pf	1	1	0	2425	2599.5	1390.5	240.25	5180.5	3619.5	183.25	19221.25	548.25	18429.75	26653.75	1925.5	930.75	2051	902	347.5	1944.5	584.5	544.5
2014	S1	3436	3436	Control	10	42.4	1	36.5	NA	NA	NA	0	0	1	M	19	Positive	30/04/2012	Pf	1	1	0	2876	366.25	260.5	5046.25	808	5595	381.25	9555	689.75	4363	8355.5	262	186.75	555.75	559	366.75	423	338.5	346.25
2014	S1	3437	3437	Control	10	NA	0	36.8	NA	NA	NA	1	1	1	M	30	Positive	29/04/2012	Pv	1	1	0	2506	2237.25	3232.5	2050.5	1858.25	12518.75	316	9822.25	313.25	13807.25	15800	2016.75	417	1503.25	868	851	779.75	314	286
2014	S1	3437	3437	Control	10	44.47	1	37	NA	NA	NA	1	1	1	M	18	Positive	29/04/2012	Pv	1	1	0	2775	182	10061.5	927.75	1575	5878	271.5	26154	480	14913.5	19375.25	247.5	114	813	1527	295	425	455.5	413
2014	S1	3437	3437	Control	10	NA	1	37	NA	NA	NA	0	0	1	M	3	Negative	29/04/2012	NA	0	3	0	3071	47	64.5	61.5	76	42.75	94	50.5	76.75	41	49	44.5	48.5	83	125	87.5	58	98.75	79.5
2014	S1	3437	3437	Control	10	44.55	1	36.8	NA	NA	NA	0	0	1	F	9	Positive	29/04/2012	Pf	1	1	0	3287	68.5	131.25	103	857.25	130	69.25	1188	142	209.5	606.5	73.25	67.75	485.75	569.5	160.75	133.5	248.25	180
2014	S1	3444	3436	Control	10	NA	0	36.2	NA	NA	NA	1	0	1	M	50	Negative	NA	NA	0	3	0	2436	3364	2451.5	85.25	260	701.25	476.5	10338.5	143	13659	16151	2823.75	1521.75	1464.5	374	116.75	1140.5	126.5	111
2014	S1	3446	3446	Intervention	8	NA	0	36	NA	NA	NA	0	0	1	M	50	Negative	29/04/2012	NA	0	3	0	2554	5343	190	159.25	1725.25	20312.25	1243	5493.25	104	3164.25	6045	2602	1075.75	991	364	97	1076	108	92.5
2014	S1	3446	3446	Intervention	8	44.48	1	36.8	NA	NA	NA	1	0	1	F	62	Positive	29/04/2012	Pf	1	1	0	2529	2173.25	195.75	286.75	915.75	2066.25	216	1159.75	365	696	2693	626	171.25	1471.25	1280	422.25	374.5	455.25	397.25
2014	S1	3446	3446	Intervention	8	NA	0	37	NA	NA	NA	1	1	1	M	30	Negative	29/04/2012	NA	0	3	0	2466	2552	169.75	336.5	770.25	3311.5	1010	5675.25	79.75	6823.75	14594.75	468.5	72.5	551	567.5	142.75	160	70.25	82
2014	S1	3446	3446	Intervention	8	NA	0	37.2	NA	NA	NA	0	0	1	F	7	Negative	29/04/2012	NA	0	3	0	2526	106.25	56	56	72	862	208.75	57	76	51.5	101.75	61.25	80	375	325.25	82.5	70.5	90	93
2014	S1	3446	3446	Intervention	8	NA	0	36.5	NA	NA	NA	1	0	1	M	78	Negative	29/04/2012	NA	0	3	0	2794	1163	130.5	1354.75	578	1487	70	9620.5	87	1327.5	1785	350.25	146.5	266	377.75	81.75	879.25	89.25	88.75
2014	S1	3446	3446	Intervention	8	NA	0	37	NA	NA	NA	1	0	3	M	32	Negative	29/04/2012	NA	0	3	0	2268	5281	606.25	7762	2313	13998.5	1097	23199	505.5	2209.5	18522	1167	271.25	1192.5	1333.75	227	941	188.5	194
2014	S1	3447	3447	Intervention	10	40.29	1	36.3	NA	NA	NA	1	1	1	F	11	Positive	29/04/2012	Pv	1	1	0	2895	93.75	114.25	346	1364	271.5	99	600.25	204	824.25	3225.75	164.5	97	258.5	3575.5	211.5	211.75	315.5	428.75
2014	S1	3447	3447	Intervention	10	NA	0	36	NA	NA	NA	0	0	1	M	9	Negative	29/04/2012	NA	0	3	0	2700	54	65.25	77.5	119	79	70	149	95	70.25	253.75	57.5	51.75	653.5	527.25	99.5	76.25	126.25	130.25
2014	S1	3447	3447	Intervention	10	NA	0	36.5	NA	NA	NA	1	1	1	F	40	Negative	29/04/2012	NA	0	3	0	2266	2615.5	1939.5	2840.25	632	1975.75	89.75	12012.75	217	2440.75	8062.75	2277.5	1162	999	10013.5	201.5	1530.75	407.5	182.5
2014	S1	3447	3447	Intervention	10	40.31	1	37	NA	NA	NA	1	1	1	F	6	Positive	29/04/2012	Pv	1	2	0	3130	71.5	103.25	117	341	87	123.75	781.5	190.75	88.25	162	78.25	243.5	494.75	533	175.5	197	300.25	226
2014	S1	3447	3447	Intervention	10	43.6	0	35	NA	NA	NA	1	1	1	F	11	Positive	29/04/2012	Pf	1	2	0	2769	130.5	457	18365.25	631.5	214	1081.75	23847.25	361.75	7677.75	22209.75	104.5	137.75	740.5	811.5	275.25	378.5	417.25	370.25
2014	S1	3447	3447	Intervention	10	38.6	0	36.5	NA	NA	NA	0	0	1	M	4	Positive	29/04/2012	Pv	1	3	0	2468	122.25	261	125.5	175.75	1558	298	348	134.5	404.75	987.5	57	101.75	199.75	541.75	166.5	174.75	247	154.75
2014	S1	3447	3447	Intervention	10	NA	0	36	NA	NA	NA	1	1	1	F	11	Negative	29/04/2012	NA	0	3	0	2774	74	654.5	2075.5	121	5059	212	660.75	78.5	336.5	843.25	50.25	57.75	245.75	613	85.5	65.75	101	82.5
2014	S2	3122	3122	Control	4	NA	1	36.9	0	0	NA	1	0	1	F	22	Negative	31/10/2012	NA	0	1	1	2958	342.25	169	284	1475.25	1363.5	416.5	15635.5	409.5	2189.5	3359	266.75	162.75	494.5	787.25	620.75	7793.5	870.75	803.25
2014	S2	3122	3122	Control	4	NA	1	37.2	0	0	NA	1	0	1	F	29	Negative	31/10/2012	NA	0	2	1	2795	404.25	1743.25	476.5	2070.75	780.25	296.5	23911.25	361.75	6005.5	16264.25	109.75	178.5	401.75	1026	292	1500.5	549.75	372
2014	S2	3122	3122	Control	4	NA	0	37	0	0	NA	1	1	1	M	28	Negative	31/10/2012	NA	0	1	1	2741	233.5	164.5	2265.5	923.5	366	109.25	4834.5	275	3284.25	4047	145.5	97.25	301.5	463	552.75	480.75	351.25	405.25
2014	S2	3122	3122	Control	4	NA	1	36.9	0	0	NA	1	0	1	M	6	Negative	31/10/2012	NA	0	1	1	3024	91.5	149.75	239.5	370.75	1241	224.25	1059	245.5	422.25	1090.75	85.25	79	333.5	419.25	203.5	204.75	306	253.5
2014	S2	3122	3122	Control	4	NA	0	37.5	0	0	NA	0	0	3	M	10	Negative	31/10/2012	NA	0	1	1	2501	120.5	133.5	456.25	409	121	106.25	239.75	294.5	440	981	98	95.75	303.25	408.25	235.75	230	350.25	259.75
2014	S2	3122	3122	Control	4	NA	0	36.5	0	0	NA	0	0	1	F	6	Negative	31/10/2012	NA	0	2	1	2579	118	155.25	219.5	553.5	128.25	131.5	610	280	148.25	165.75	107.5	129.75	371.75	514	305.25	340.75	549.5	441
2014	S2	3122	3122	Control	4	40.5	1	36.7	0	0	NA	1	0	3	F	6	Positive	31/10/2012	Pf	1	1	1	2652	82	1691.25	748.5	492	18321	947.5	501.75	312.75	6089.75	8848	88.75	108.25	237	782.5	201.75	180	273.75	265
2014	S2	3122	3122	Control	4	NA	0	36.9	0	0	NA	0	0	1	M	11	Negative	31/10/2012	NA	0	1	1	2851	769	186	4323.75	589.75	4511.75	1141.5	854.75	588	5848.75	8237.25	130	236	381	475.5	294.75	479	429.25	346.5
2014	S2	3122	3122	Control	4	NA	0	36.5	0	0	NA	1	0	2	F	8	Negative	31/10/2012	NA	0	2	1	3336	91.5	116.5	160	348	197.25	128	126.5	231.25	125.25	386.25	112	99	266	391.5	280	201.5	273.25	239.75
2014	S2	3122	3122	Control	4	NA	1	36.8	0	0	NA	1	0	1	F	50	Negative	31/10/2012	NA	0	1	1	2663	951	3364.75	1650	1928.25	139	123.75	8015	416.5	1177.5	1934	4452.25	224.5	1587.25	992.5	283.25	635.75	354	321.5
2014	S2	3122	3122	Control	4	NA	1	36.9	0	0	NA	1	0	1	M	41	Negative	31/10/2012	NA	0	1	1	2683	847.5	2913	6066.75	1310	226.5	155.5	19903.75	579	3466.25	6030	277.5	266	652.75	1424	630	452.5	550	462.5
2014	S2	3122	3122	Control	4	NA	1	36.8	0	0	NA	1	0	1	M	31	Negative	31/10/2012	NA	0	1	1	2851	843.5	172	736.25	872.25	255.5	140	22552.25	391.5	2175.75	2770	149.75	191.25	478.25	675.5	301	435.75	460.5	377
2014	S2	3122	3122	Control	4	NA	1	37.5	0	0	NA	1	0	1	F	40	Negative	31/10/2012	NA	0	2	1	2911	NA	304.25	332	733.5	249.25	143.5	NA	400.25	NA	NA	NA	328.5	866.5	870	375	678.75	514	481
2014	S2	3122	3122	Control	4	NA	0	36.5	0	0	NA	1	0	1	F	12	Negative	31/10/2012	NA	0	3	1	2809	1067.5	1259.75	112.5	721	686.25	71	1605.5	173.5	432	1038	120.5	65.5	187.5	1524.5	181.75	420	116.75	151.5
2014	S2	3122	3122	Control	4	NA	0	36.8	0	0	NA	1	0	1	M	23	Negative	31/10/2012	NA	0	1	1	2896	411	128	516.5	1381.75	396	119.5	16985.75	318.5	6925.25	8695.5	5013.75	1976	NA	3743.25	308.5	590.25	671.5	643.5
2014	S2	3122	3122	Control	4	NA	1	37.2	0	0	NA	1	1	1	F	18	Negative	31/10/2012	NA	0	1	1	2676	95	109	142.5	410.5	80	188.5	300.75	205.25	91.5	170.75	118.5	92.25	261.5	1793	406.5	193.75	257	260
2014	S2	3122	3122	Control	4	NA	1	37.5	0	0	NA	1	1	2	M	36	Negative	31/10/2012	NA	0	1	1	2808	1560	166.25	926.25	453.5	3195	217.75	11310.75	206.25	6114.5	6942	259	106.75	421	382	185.25	827.25	220	226.5
2014	S2	3122	3122	Control	4	NA	1	36.9	0	0	NA	1	0	1	F	30	Negative	31/10/2012	NA	0	1	1	2977	1420.75	337.25	754.75	460.75	4831.25	1225.75	481.25	382.5	455	1684.25	873.75	183.5	730.75	806.5	290.5	1070	416.75	319.5
2014	S2	3122	3122	Control	4	NA	0	36.7	0	0	NA	0	0	1	F	12	Negative	31/10/2012	NA	0	1	1	3288	83	101.5	357	353.5	275	102.5	100.5	156	91.5	218.5	97.5	85.75	208	289.25	181	163.5	244.5	208
2014	S2	3122	3122	Control	4	NA	1	36.3	0	0	NA	1	1	2	M	27	Negative	31/10/2012	NA	0	1	1	2971	685.5	191.5	101	307.5	862	100.5	546	122	513	819	301	89	291.25	330	130.25	257.5	274	180.25
2014	S2	3122	3122	Control	4	NA	1	37	0	0	NA	1	0	2	M	23	Negative	31/10/2012	NA	0	1	1	2607	580.5	81.5	7397	1826	3593.75	68.5	10574.75	321.25	1524	10986.25	246.5	72.75	297.5	363.75	140.25	209.25	210.5	186
2014	S2	3122	3122	Control	4	NA	1	36.7	0	0	NA	1	0	2	M	4	Negative	31/10/2012	NA	0	2	1	2904	84.5	121.75	172	392.5	986.25	155.5	397	209.25	137	269.5	81	81.5	598.25	462.75	198.25	199.5	333.75	276
2014	S2	3122	3122	Control	4	NA	1	36.3	0	0	NA	1	0	1	F	50	Negative	31/10/2012	NA	0	1	1	2669	1619.5	1247.75	1040.5	998.5	4465	227	1951	452.75	565.25	1841.75	281.5	283.5	742.75	1350.75	599.5	473.5	781.5	704.5
2014	S2	3122	3122	Control	4	NA	0	37.2	0	0	NA	1	0	1	M	6	Negative	31/10/2012	NA	0	1	1	3706	157.75	138	570.75	1449.25	1182.25	106.75	542.75	212	124.75	159.25	78.25	88.25	448.5	1105.25	221	265	522.75	300.75
2014	S2	3122	3122	Control	4	NA	1	36.7	0	0	NA	1	0	2	M	4	Negative	31/10/2012	NA	0	2	1	3179	131.25	151.5	394.5	782.25	4560	579.75	203	275.25	348	572	83.5	98.25	560.25	871.25	300.5	317.5	580	403.75
2014	S2	3122	3122	Control	4	NA	1	37.6	0	0	NA	1	0	1	M	26	Negative	31/10/2012	NA	0	3	1	3117	58.5	207.5	159.25	114.25	2580.5	65.5	7659	66.5	2111.75	5889.5	62.75	51	424	210.5	67	69.75	99	60.5
2014	S2	3122	3122	Control	4	NA	0	37.4	0	0	NA	1	1	2	M	53	Negative	31/10/2012	NA	0	1	1	3355	1331.75	85.75	120	512.5	614.75	147.5	706.5	163.5	83	780.25	236.25	579	471	883.5	176	961.5	315.25	367.25
2014	S2	3122	3122	Control	4	NA	0	36.9	0	0	NA	0	0	2	F	12	Negative	31/10/2012	NA	0	1	1	967	210.75	97	3471	479	162.25	87.75	183.5	254.5	1241	2950.75	62.5	94	300.75	407	171.5	304.75	210	186
2014	S2	3122	3122	Control	4	NA	0	37.2	0	0	NA	0	0	2	F	45	Negative	31/10/2012	NA	0	1	1	3965	2628	109.5	1554.5	2187	1101	155	1959.75	228	2107.5	4062.5	1683.5	599	1052	587	624	1071	286.5	252.25
2014	S2	3122	3122	Control	4	NA	1	36.5	0	0	NA	1	0	1	F	3	Negative	31/10/2012	NA	0	1	1	4554	258	124.75	87.5	262	489	102	434.25	290	676.5	3036.25	49.5	82.25	185	267.75	124	105.75	157	156
2014	S2	3122	3122	Control	4	NA	1	36.8	0	0	NA	0	0	1	M	8	Negative	31/10/2012	NA	0	1	1	3674	143	302.5	1741	1307.25	943.75	99	3312.5	277.5	1205	1852.5	77.5	92.5	359.25	633.5	236.25	1048.5	532.5	310.5
2014	S2	3122	3122	Control	4	NA	1	36.7	0	0	NA	0	0	1	M	4	Negative	31/10/2012	NA	0	3	0	2725	998.25	185.25	128.25	190.5	76	86	708.5	136.5	209	777	103.25	79	562.25	15624.5	1868	131.5	267.75	175.5
2014	S2	3122	3122	Control	4	NA	1	36	0	0	NA	0	0	1	M	55	Negative	31/10/2012	NA	0	1	1	1413	1357	106	118.5	411.5	516.25	71.5	133	183.25	220.5	276.5	1183.75	351.75	855.25	431	182.75	185.5	249	233.5
2014	S2	3122	3122	Control	4	NA	1	36.7	0	0	NA	0	0	1	F	46	Negative	31/10/2012	NA	0	2	1	3709	914	867.5	1218.75	428	1157	87.5	2011.5	393.5	1843.25	1843.5	445.5	628.5	616.25	773.5	223	310.5	249	246.5
2014	S2	3122	3122	Control	4	NA	1	37	0	0	NA	1	0	1	M	20	Negative	31/10/2012	NA	0	2	1	3954	63.25	82.5	182	435.25	168.75	58.75	324.5	275.5	766.25	1208	61	53.25	1241.25	1084.5	156	303.5	144.75	158.25
2014	S2	3122	3122	Control	4	NA	1	36.3	0	0	NA	0	0	1	M	8	Negative	31/10/2012	NA	0	1	1	4153	58	76.5	92	340.5	67	67.5	172.5	153.5	67.75	116	59	62.5	178.75	330.5	153	136	207.5	173
2014	S2	3122	3122	Control	4	NA	0	36.8	0	0	NA	1	1	1	F	23	Negative	31/10/2012	NA	0	1	1	3195	1372.25	1327.75	420.5	6747.5	848.5	99.5	28632.25	469.5	12546.5	20155.5	1604	115.25	980	1694	196.75	523.25	236.5	257.5
2014	S2	3122	3122	Control	4	NA	1	36.7	0	0	NA	0	0	1	M	3	Negative	31/10/2012	NA	0	1	1	3613	58	80.75	120	NA	NA	107	63.75	155.5	68.5	NA	55	65.75	232.5	368.5	NA	NA	224.5	205.25
2014	S2	3122	3122	Control	4	NA	1	36.4	0	0	NA	1	1	1	M	55	Negative	31/10/2012	NA	0	1	1	2689	1591.5	197	1190.5	2175.5	4153	484	7147	140.25	7280.5	12636	231	1401.5	1060.25	2203.75	130.5	3872.5	166	155
2014	S2	3122	3122	Control	4	NA	1	36.7	0	0	NA	1	0	1	F	45	Negative	31/10/2012	NA	0	3	0	2213	2787.25	121	1749.75	2817	4414.5	64	8712.5	328.25	965	2115.5	1718.25	1594	854	3926.75	1023.75	1175.75	104.25	123.75
2014	S2	3122	3122	Control	4	NA	1	36.3	0	0	NA	1	1	1	F	20	Negative	31/10/2012	NA	0	1	1	3982	320	2257.25	131.25	2682.5	1185.5	125.5	8805	298	926	1428	509.75	800.5	735.5	757	327.5	410.5	265.25	251.25
2014	S2	3122	3122	Control	4	NA	1	36.9	0	0	NA	1	1	2	M	18	Negative	31/10/2012	NA	0	1	1	3602	577.75	240.25	1313.75	1126.25	837	145.25	1163.5	519.75	2349	2372.75	143.5	114	744.75	889.5	1106.5	418.75	430.75	347.25
2014	S2	3130	3130	Control	7	NA	0	37	0	0	NA	1	0	1	F	13	Negative	1/11/2012	NA	0	1	1	3339	72.5	124	1738.5	423.75	295.75	93	695.5	207.5	231	460.75	62.5	94.5	385.25	541.5	188.75	NA	265.5	223.5
2014	S2	3130	3130	Control	7	NA	0	37	0	0	NA	1	0	1	M	11	Negative	1/11/2012	NA	0	1	1	3704	81	80.75	102.75	523.5	907.25	390	1173	147	366.75	356.75	71.5	111	283	442.5	165	151	211.25	231
2014	S2	3130	3130	Control	7	NA	0	36.4	0	0	NA	1	0	1	M	7	Negative	1/11/2012	NA	0	1	1	3504	65	77	83.25	NA	61	86	95.5	127	65.5	66.25	60	66	383	565.25	141.5	127.75	NA	162.5
2014	S2	3130	3130	Control	7	NA	0	35	0	0	NA	1	0	1	F	30	Negative	1/11/2012	NA	0	1	1	2989	1047	2022	133	1851.25	5308.5	442.5	906.5	253	6142.5	6553.25	1557.75	864	1180	563.25	233.75	459	340	278
2014	S2	3130	3130	Control	7	NA	0	36	0	0	NA	0	0	1	M	10	Negative	1/11/2012	NA	0	1	1	3553	2630	484.5	1885.5	NA	22014.75	2697.5	6212.25	NA	3133.75	3665	86.5	101.5	646.5	930	285.25	833	522.5	372
2014	S2	3130	3130	Control	7	NA	0	37	0	0	NA	0	0	1	F	11	Negative	1/11/2012	NA	0	1	1	4268	202.5	123	111	486.25	513	108	624.5	232.5	807.5	793.5	71.5	77.5	409	495.75	180	229.25	381.5	249.75
2014	S2	3130	3130	Control	7	NA	0	37	0	0	NA	0	0	1	F	17	Negative	1/11/2012	NA	0	1	1	2886	80.75	2014.25	183.75	766.5	1227.75	1396	15795	220	9528	16657	104.75	107.5	376.5	2115.25	177.25	465.5	254.75	220
2014	S2	3130	3130	Control	7	NA	0	37	0	0	NA	0	0	1	M	2	Negative	1/11/2012	NA	0	1	1	2751	39	50.25	55.5	137.5	59	46	43.5	82	41.5	56	36.25	40.5	81.75	172.5	96	62.5	105	100
2014	S2	3130	3130	Control	7	NA	1	36	0	0	NA	1	0	1	F	12	Negative	1/11/2012	NA	0	1	1	3738	93.75	1646	117.75	977.5	1543.5	137.25	695.75	187.25	1658	2429	62	63.5	638.25	778.25	182.5	165.5	277.5	214.75
2014	S2	3130	3130	Control	7	NA	0	37	0	0	NA	1	0	1	F	14	Negative	1/11/2012	NA	0	1	1	3595	61.75	75.5	510.5	239	85.75	68.75	83	108.5	79	209.75	55.25	66	394.75	525.25	114.25	127.75	150	154
2014	S2	3130	3130	Control	7	NA	0	37	0	0	NA	1	0	1	F	50	Negative	1/11/2012	NA	0	1	1	3657	1452.25	99.75	999.5	1334	311	218	15759.5	325	4905.75	7732	250.25	339.25	447.75	1119	207.75	1101.5	264	214.25
2014	S2	3130	3130	Control	7	NA	1	37	0	0	NA	1	0	1	M	3	Negative	1/11/2012	NA	0	1	1	3547	37	49	59	168	236	188	48.5	79	89.5	84	38.5	40.5	77	160.5	87.5	78	104	95
2014	S2	3130	3130	Control	7	NA	0	36	0	0	NA	1	0	1	M	12	Negative	1/11/2012	NA	0	1	1	3310	112	1238.75	5404.5	985.75	283.5	83	20557.75	530	10767	14577	62.5	74.75	351.25	660.25	205.25	187.5	237.75	255
2014	S2	3130	3130	Control	7	NA	0	36	0	0	NA	1	0	1	F	3	Negative	1/11/2012	NA	0	1	1	4143	38.5	54	68.5	171.25	41.5	43.25	46.5	82.5	45.75	57.5	39	42.25	107	180	96	82.25	114.5	105.75
2014	S2	3130	3130	Control	7	NA	0	37	0	0	NA	1	0	1	F	16	Negative	1/11/2012	NA	0	1	1	3207	1103.25	108.75	116	441.5	7718	294.5	2566.5	203.25	1842	5520.5	250.5	81	472.25	500	180.5	319.5	227.75	210.25
2014	S2	3130	3130	Control	7	NA	0	36	0	0	NA	1	0	1	F	7	Negative	1/11/2012	NA	0	1	1	3313	85.5	71.5	82.25	242.5	65	65	55.5	119.25	68.5	122.5	55.25	67.5	430.5	477.5	135.5	110.25	177.25	174.75
2014	S2	3130	3130	Control	7	NA	0	37	0	0	NA	1	1	1	M	19	Negative	1/11/2012	NA	0	1	1	3710	472.25	104	2604	561.25	7586.75	164.75	3834.5	389.25	2201.75	6280	73.5	83.5	423.5	556.25	175	157.25	210	226.5
2014	S2	3130	3130	Control	7	NA	0	36.4	0	0	NA	1	0	1	M	10	Negative	1/11/2012	NA	0	1	1	4217	50.25	60.5	67.25	188.5	47.75	58.5	44.25	101	51.25	46	48.75	125.5	171	273.5	108.5	85	138	136.25
2014	S2	3131	3131	Control	7	NA	0	36.5	0	0	NA	0	0	1	M	9	Negative	31/10/2012	NA	0	1	1	4304	58	180	69	208.75	148.75	95.25	250.5	143	103.5	213	53	52.5	144.75	227.5	111.25	93.75	153	117.25
2014	S2	3131	3131	Control	7	NA	0	36.5	0	0	NA	0	0	1	M	7	Negative	31/10/2012	NA	0	2	1	4062	131.25	146	200.25	663.5	1026	98.25	444.5	295	1113	2396.25	74	83	459	661.5	250.5	271.75	522.75	326
2014	S2	3131	3131	Control	7	NA	0	37	0	0	NA	0	0	1	F	4	Negative	31/10/2012	NA	0	1	1	3879	59.25	88.5	89	453.75	61	72.5	65	149.75	76.5	85.5	61.75	102	961	934	168.75	207.25	383.5	260
2014	S2	3131	3131	Control	7	NA	0	37	0	0	NA	0	0	1	F	38	Negative	31/10/2012	NA	0	1	1	3215	2683	114	1067	420.5	8606	133.75	NA	339.5	4253.75	8246	1267	3225	995.5	987.25	651	810.75	202	197.5
2014	S2	3131	3131	Control	7	NA	0	37	0	0	NA	1	0	1	M	24	Negative	31/10/2012	NA	0	1	1	3373	405	150.5	132	745	1890.75	101	13952	245	3716.75	6366	67.5	112.5	416.25	472.75	191.75	547	420.25	236.75
2014	S2	3131	3131	Control	7	NA	0	37	0	0	NA	0	0	1	M	65	Negative	31/10/2012	NA	0	1	1	2971	1187.5	109	10987	963	5016.25	76	NA	289.5	9588.5	10635	281.5	75.5	467.5	618	186.25	513.25	277.75	196.75
2014	S2	3131	3131	Control	7	NA	0	37	0	0	NA	0	0	1	F	39	Negative	31/10/2012	NA	0	1	1	3613	1220.25	828.5	132.5	431	523	102.25	4534.75	233	997.25	1646	657.5	164.5	1514.75	1688.5	214	463.5	262	250.5
2014	S2	3131	3131	Control	7	NA	0	37	0	0	NA	0	0	1	F	19	Negative	31/10/2012	NA	0	1	1	3813	947	1609.5	142	439.75	2141.5	203	3203	182	359.5	2194.75	67.75	81	320	468.5	177.5	258.75	190.5	199.5
2014	S2	3131	3131	Control	7	NA	0	37	0	0	NA	0	0	1	F	45	Negative	31/10/2012	NA	0	1	1	3444	584.5	113	151	278.25	2616	68.75	10527.5	242.5	2002.5	2621.75	447.75	64.25	344	344.75	137.75	596.5	169	170
2014	S2	3131	3131	Control	7	NA	0	36.5	0	0	NA	0	0	1	F	2	Negative	31/10/2012	NA	0	1	1	4207	36	52	48.5	123.5	53.25	44.75	41.5	73.5	42	63.25	38	42	70.5	157	86.75	64.75	90	94.25
2014	S2	3131	3131	Control	7	NA	0	37	0	0	NA	1	1	1	M	17	Negative	31/10/2012	NA	0	1	1	3420	945.5	689.75	697.5	NA	338	83.5	16924.5	230.5	528.75	350.75	148.25	166.75	NA	NA	191.5	NA	277.25	NA
2014	S2	3131	3131	Control	7	NA	0	36.5	0	0	NA	1	0	1	M	7	Negative	31/10/2012	NA	0	1	1	3406	43	65.5	66.75	184.25	46	60.75	73	97.5	52.5	64.75	49	50.5	182.25	293	104.5	94.25	146.75	136
2014	S2	3131	3131	Control	7	NA	1	37	0	0	NA	1	0	1	F	22	Negative	31/10/2012	NA	0	1	1	3122	482	697.75	2460.5	924	12615.5	390.25	13070	255.5	2423.25	5368.5	73.25	82	585.75	1941.25	278.5	377.5	365	187.5
2014	S2	3131	3131	Control	7	NA	0	37	0	0	NA	1	0	1	F	39	Negative	31/10/2012	NA	0	1	1	3500	1164.5	88.5	296.5	687	1040	134	9299.5	227	1626.5	2636	5253.25	1216.5	1810.25	6957.5	588	160	211	193.25
2014	S2	3131	3131	Control	7	NA	0	37	0	0	NA	1	0	1	M	24	Negative	31/10/2012	NA	0	1	1	3805	364.25	323.25	87.25	265.5	357	57.75	593	163.25	230.25	816.75	96.5	72.5	239	293.5	127	128	161.5	158.5
2014	S2	3131	3131	Control	7	NA	0	37	0	0	NA	1	0	1	M	10	Negative	31/10/2012	NA	0	1	1	4026	119.5	88.5	102.5	353	835.5	89.5	731.5	151.75	215	417.5	61	63.5	211.5	369	168.5	145.5	224	189.5
2014	S2	3131	3131	Control	7	NA	0	37	0	0	NA	1	0	1	F	65	Negative	31/10/2012	NA	0	1	1	4043	1184	96	2311.25	482	2404.5	368.25	2022	195.75	1510.5	5130.25	191.75	88.5	512	433	172.75	2173.75	384	237.5
2014	S2	3131	3131	Control	7	NA	0	37	0	0	NA	0	0	1	F	14	Negative	31/10/2012	NA	0	1	1	3636	166	112.5	143.5	528.5	99.5	93.5	342.75	195.5	315.5	242	146.5	1598.5	764.75	668	234	311	510	310.5
2014	S2	3131	3131	Control	7	NA	0	36.5	0	0	NA	0	0	1	M	12	Positive	31/10/2012	Pv	1	2	0	3521	72	63.5	64.75	225.5	4700	150	714.75	100.5	124	1086	50.5	65	189	382	125	182.5	182.75	125.5
2014	S2	3131	3131	Control	7	NA	0	36.5	0	0	NA	0	0	1	M	25	Negative	31/10/2012	NA	0	1	1	3928	954.5	103.5	138.75	593	1144	88.25	202.25	227.5	487.5	962	1969	424	1047.5	589	208	476	512.25	320.5
2014	S2	3131	3131	Control	7	NA	1	37	0	0	NA	1	0	1	F	25	Negative	31/10/2012	NA	0	2	1	3338	156.5	99.25	119.5	241	371	216.5	5613.75	112.5	1639	2318.25	82.5	60.5	271	1384.5	118	153	157.25	154
2014	S2	3131	3131	Control	7	NA	0	37.5	0	0	NA	1	0	1	M	26	Negative	31/10/2012	NA	0	1	1	2513	3786.5	70.5	83	688.75	3055.5	65	6653.75	134.25	869.5	701.5	562.5	349.25	602.75	387.5	130	320.5	184.5	174.75
2014	S2	3131	3131	Control	4	NA	0	37	0	0	NA	1	1	1	M	25	Negative	31/10/2012	NA	0	1	1	3880	887.75	83.5	1477.5	439.5	398	86.5	2614.75	223.5	1647.5	7133.5	688.5	721.75	662.75	528.5	164.5	1074.75	239.5	202.75
2014	S2	3131	3131	Control	7	NA	1	37.5	0	0	NA	1	0	1	M	60	Negative	31/10/2012	NA	0	1	1	3877	104.5	93	100.75	375.25	79.75	191.5	100.75	209.5	153.5	260.25	69	86.75	183.5	529	166.5	224.25	241	186.75
2014	S2	3131	3131	Control	7	40.7	0	36.5	0	0	NA	1	0	1	F	11	Positive	31/10/2012	Pf	1	1	0	3110	299	189.75	125.25	3093.5	2278.5	241	15544.75	397.25	9380.5	21536.5	59	328	769.75	959.25	158	238.25	188.75	197.25
2014	S2	3131	3131	Control	7	NA	0	37	0	0	NA	1	0	1	F	49	Negative	31/10/2012	NA	0	1	1	3571	1876.5	100.5	2239	544.75	5602.5	131.5	5542.5	263.5	1402.5	2143.75	3248.75	998	1421.75	631	211.5	556	271.25	272
2014	S2	3131	3131	Control	7	NA	0	36.5	0	0	NA	0	0	1	F	10	Negative	31/10/2012	NA	0	3	1	3083	31.75	45	39	46.25	44.25	38	38	88.5	131.25	351	37.5	52	65	94.5	57.5	41	48.75	50
2014	S2	3131	3131	Control	7	NA	0	36.5	0	0	NA	0	0	1	F	4	Negative	31/10/2012	NA	0	3	1	3382	38.5	50.5	51.5	63	42.5	49	47	66.25	40	45.5	43	47.5	85.5	114	73	54.5	72	68
2014	S2	3131	3131	Control	7	NA	0	36.5	0	0	NA	0	0	1	M	7	Negative	31/10/2012	NA	0	1	1	3056	54	74.75	521.5	277.75	14945	1633.75	1603	149.25	427	826.5	71.5	57.75	369.75	481.75	140.5	112.75	200.25	167
2014	S2	3131	3131	Control	7	NA	0	36.5	0	0	NA	0	0	1	M	5	Negative	31/10/2012	NA	0	1	1	3828	47	61	61	169.75	85.75	84	45.25	94	50.5	48.5	46.75	53.75	150.75	304.5	137.5	89	175.5	125.75
2014	S2	3131	3131	Control	6	NA	0	37	0	0	NA	0	0	1	F	32	Negative	31/10/2012	NA	0	1	1	3874	53.75	59	66.75	175	73.5	65.75	233.75	95.5	97.75	152	119.5	72.75	262.25	385.25	101.75	85.5	120.25	120.75
2014	S2	3131	3131	Control	6	NA	0	37	0	0	NA	0	0	1	M	12	Negative	31/10/2012	NA	0	1	1	3665	384	736	87.5	989.5	1524.5	141.5	7666.75	132.25	2834.5	4839.5	115.5	164.5	506.75	396	121	575.5	166	165.75
2014	S2	3132	3132	Intervention	7	NA	0	36.7	1	NA	NA	0	0	1	M	13	Negative	1/11/2012	NA	0	1	1	4028	34.5	43.5	43	106.75	32.75	38.75	66	66	44	75	46.75	38.5	131.25	196.75	67	54	82.75	77
2014	S2	3132	3132	Intervention	7	NA	0	36.1	1	NA	NA	0	0	1	F	6	Negative	1/11/2012	NA	0	1	1	4001	55	71	82.5	234.5	209	97.5	52.25	128	59	61.5	56.5	67.5	938.75	868.5	153.5	120	196.75	158
2014	S2	3132	3132	Intervention	7	NA	0	36	1	NA	NA	0	0	1	F	8	Negative	1/11/2012	NA	0	3	1	2631	32.5	43.5	44	56	34	44	40.5	60.25	54.5	35	36.75	40	71	119	67	52	67.5	61.5
2014	S2	3132	3132	Intervention	7	NA	0	36.3	0	1	NA	1	1	1	M	52	Negative	1/11/2012	NA	0	1	1	3487	9604.25	1449.5	668	658	597.5	104.75	7987.25	344.25	4786	6394	976.25	845.25	1010	555	267.5	319.5	261	267.5
2014	S2	3132	3132	Intervention	1	NA	0	36.3	0	1	NA	1	1	1	M	25	Negative	1/11/2012	NA	0	1	1	3719	39.25	48.5	52.75	154	57	75	109.5	81.75	52	94.25	41.5	45.25	102.25	186.5	91.5	69.25	105.25	101.5
2014	S2	3132	3132	Intervention	7	NA	0	36.4	0	0	NA	1	1	1	F	22	Negative	1/11/2012	NA	0	3	0	3011	169.75	50	1651	178.75	67.25	51.5	8169.75	163.25	1275.5	2098	98	141.75	98.5	226.25	67.75	113	93	65.75
2014	S2	3132	3132	Intervention	7	NA	0	36.8	1	NA	NA	1	0	1	F	40	Negative	1/11/2012	NA	0	1	1	3571	196.75	557.75	152.75	385.75	162.5	95.25	1254.25	164	406	507.5	73.25	66	280	306.25	320.75	120	207.75	176
2014	S2	3132	3132	Intervention	7	NA	0	36.3	1	NA	NA	1	0	1	M	12	Negative	1/11/2012	NA	0	1	1	3793	50	54	79.25	161.5	46.5	47.25	42	75.75	45.5	91.25	47.5	46.5	112.5	203.5	102	78	109.25	108
2014	S2	3132	3132	Intervention	7	NA	0	36.7	1	NA	NA	1	0	1	M	8	Negative	1/11/2012	NA	0	3	1	3147	26.5	31.75	28.75	36.5	25	29.5	27.5	35	26	42	33	34	68	105.25	48	34	39	43
2014	S2	3132	3132	Intervention	7	NA	0	37.2	1	NA	NA	1	0	1	F	56	Negative	1/11/2012	NA	0	1	1	3154	979.25	109	187.5	1173.75	1102.5	158.75	18012	428.25	4105	4165.25	1281	656	1021.5	1091.5	224.75	416.5	317.5	265.75
2014	S2	3132	3132	Intervention	7	NA	1	37	0	1	NA	1	0	1	M	13	Negative	1/11/2012	NA	0	1	1	4031	42.5	59	65.25	176	44.75	209	185.5	96.75	47	80.75	42	55	189.5	371	89.75	74	122	100
2014	S2	3132	3132	Intervention	7	NA	0	36.4	1	NA	NA	0	0	1	M	13	Negative	1/11/2012	NA	0	1	1	3742	51	73.5	77.25	236.5	49	59	79.25	135	64.75	83	55	59.5	155	291.5	134.5	130.25	199.5	200
2014	S2	3132	3132	Intervention	7	NA	0	36.8	1	NA	NA	1	0	1	F	64	Negative	1/11/2012	NA	0	2	1	3731	1577.5	1363.25	2715	731.75	2674.75	72	7368.5	231.25	2254	NA	146.75	413	450.5	573.5	256.75	161.25	177	169.75
2014	S2	3132	3132	Intervention	7	NA	1	36.8	1	NA	NA	0	0	1	F	26	Negative	1/11/2012	NA	0	1	1	3767	378.25	109.5	408.5	1515.75	1106.5	102.25	2513.5	368	2318	5683	162	246.5	427.25	456.75	181	1223	240.75	213
2014	S2	3132	3132	Intervention	7	NA	1	36.6	1	NA	NA	1	0	1	F	3	Negative	1/11/2012	NA	0	2	1	3703	55.5	59.25	58.5	177	50.5	55	140.5	120.75	49	61.75	56.5	55.5	268	501.5	106.5	94	124.5	129
2014	S2	3132	3132	Intervention	7	NA	0	36	1	NA	NA	0	0	1	M	8	Negative	1/11/2012	NA	0	1	1	3969	58.5	79.5	100	248.25	467.25	267.25	800.75	172.25	82	190	60.75	74.25	158	310.75	148	120	201.25	157.25
2014	S2	3132	3132	Intervention	7	NA	0	36.3	1	NA	NA	1	0	1	F	26	Negative	1/11/2012	NA	0	1	1	3134	393.5	98.5	498.75	453	1522.25	144.5	268	156	766.75	1380.5	153.25	111.25	391.75	820	174.5	242.25	366.75	235.75
2014	S2	3132	3132	Intervention	7	NA	0	36.4	1	NA	NA	1	0	1	M	4	Negative	1/11/2012	NA	0	1	1	3527	86	102.75	107.5	349.25	141.75	85	85.75	178	88.75	105	73	81	252	473.5	189.75	193.75	274.75	260.5
2014	S2	3132	3132	Intervention	NA	NA	0	36.3	1	NA	NA	NA	NA	NA	M	14	Negative	1/11/2012	NA	0	2	1	3095	51	67	74	195	58.75	64.5	56	104.25	57	79.25	47.5	50.5	187.5	299.75	108	93.5	138.75	131
2014	S2	3132	3132	Intervention	7	NA	0	36.5	1	NA	NA	0	0	1	M	12	Negative	1/11/2012	NA	0	1	1	4268	62.5	55.5	58	148	86.75	68	40	96.75	69.25	184	52	71.5	127.25	199.5	99.25	82	110.75	92
2014	S2	3132	3132	Intervention	7	NA	0	36.4	1	NA	NA	0	0	1	M	6	Negative	1/11/2012	NA	0	1	1	3577	48	69	81.5	239	52	64.5	49.25	119.75	56	125.25	48	55	134.25	303.25	136	200.5	193.75	154
2014	S2	3132	3132	Intervention	7	NA	0	36.3	1	NA	NA	0	0	1	F	4	Negative	1/11/2012	NA	0	2	1	3897	42.5	65	74	236	56.5	51.5	48.75	108.5	56	54.5	43.5	50.5	109	210.5	120	109	139.75	135.5
2014	S2	3132	3132	Intervention	7	NA	0	36	1	NA	NA	0	0	1	M	2	Negative	1/11/2012	NA	0	1	1	4082	38	54.5	58.25	179	36.5	42.75	36.5	76	46.75	45.25	37	40.5	83	155.5	86	76	117	96
2014	S2	3132	3132	Intervention	1	NA	0	36.3	0	1	NA	0	0	1	M	56	Negative	1/11/2012	NA	0	1	1	3343	976.25	269.75	1057	1788.75	1744.75	142.25	8473	354	1554.5	2030.5	393.25	319.75	655	673.5	311.25	716.25	534.5	371.25
2014	S2	3132	3132	Intervention	1	NA	0	36.8	0	1	NA	0	0	1	F	19	Negative	1/11/2012	NA	0	1	1	3761	39	52.75	62	161	39	41.75	50	82.5	44.75	79.5	70.5	55.5	110	170	85	108.75	129.25	101
2014	S2	3132	3132	Intervention	7	NA	0	36.3	1	NA	NA	0	0	1	F	7	Negative	1/11/2012	NA	0	1	1	3864	46	63.5	75	231.25	131.5	108.5	56.25	120	58	104.25	45.5	63	208.5	281.5	132.25	116.5	146.75	146.75
2014	S2	3132	3132	Intervention	7	NA	0	36.4	1	NA	NA	0	0	1	F	2	Negative	1/11/2012	NA	0	1	1	3669	62	126.5	131	409.75	233	183.5	63.75	212	106.5	168.5	54.5	62.5	234.5	395.5	206.25	228.75	251.5	245.75
2014	S2	3132	3132	Intervention	7	NA	0	36.5	1	NA	NA	0	0	1	F	28	Negative	1/11/2012	NA	0	1	1	3317	94	97.75	112.25	321	91.25	77	208	250.25	1024.5	900.25	61.25	65.25	170.75	323	178.5	179.5	210.5	194.5
2014	S2	3132	3132	Intervention	7	NA	0	36.3	1	NA	NA	1	0	1	M	2	Negative	1/11/2012	NA	0	1	1	3549	42.25	57.5	64	172.25	37.5	44.25	42.5	130.75	53.75	119.5	39.25	44.75	101.5	170	96	91.5	120.25	112.5
2014	S2	3132	3132	Intervention	7	NA	0	37	1	NA	NA	1	1	1	M	46	Negative	1/11/2012	NA	0	1	1	3630	1182	231.5	150.5	525.5	513	77.5	3585.5	101.5	748.75	2374.25	342.75	346.5	323.25	441	104.5	185.25	136	118.25
2014	S2	3132	3132	Intervention	7	NA	0	36	1	NA	NA	1	0	1	M	2	Negative	1/11/2012	NA	0	1	1	3742	38	51.5	56.5	145.5	33.5	41	37	77.5	44.25	99.75	40	42.5	145	216.5	94.5	79	114.5	96
2014	S2	3132	3132	Intervention	7	NA	0	36.2	1	NA	NA	0	0	1	M	5	Negative	1/11/2012	NA	0	1	1	3899	37	53.5	60.5	182.75	43.5	43	42.5	90.75	46.5	60	38.75	42.5	96	153.75	99.75	94.25	125	107.75
2014	S2	3132	3132	Intervention	7	NA	0	36.5	1	NA	NA	1	1	1	M	30	Negative	1/11/2012	NA	0	1	1	2925	983.25	3234	3213	1283.5	266	193	9597.75	292	6028.5	7391.5	435.5	199.5	289.25	2420.75	354.25	450	167.25	139
2014	S2	3132	3132	Intervention	7	NA	0	36.8	1	NA	NA	1	1	1	M	2	Negative	1/11/2012	NA	0	1	1	3266	44.5	67.5	81	219.5	47.5	52	46	119.5	57.5	69	46.5	48.5	122.5	204.5	133	129.25	150.25	137.5
2014	S2	3132	3132	Intervention	7	NA	0	36.3	1	NA	NA	0	0	1	F	60	Negative	1/11/2012	NA	0	1	1	3400	3488	280.5	187	633.25	2239.5	249.5	1781.25	188	1246.25	2514.25	1565.75	843.75	612.25	332.25	168.25	1704	189.25	187.5
2014	S2	3132	3132	Intervention	7	NA	0	36	1	NA	NA	0	0	1	M	2	Negative	1/11/2012	NA	0	3	0	3236	24	29.5	27.5	34.5	22.75	27	26.5	31.5	23.5	42	28	28.25	39.5	53	39.5	31.5	36.5	37.5
2014	S2	3132	3132	Intervention	7	NA	0	36.3	1	NA	NA	0	0	1	F	10	Negative	1/11/2012	NA	0	1	1	3802	48	60.5	66.25	179.75	65.5	60.25	74	121.5	72	87.25	46	50	140.5	280.5	184.25	98	138.5	123
2014	S2	3132	3132	Intervention	7	NA	0	36.1	1	NA	NA	1	0	1	M	3	Negative	1/11/2012	NA	0	1	1	3738	58	77	95	227	550	305.25	54.75	130.25	56.5	71	52	54.5	129	242	133.5	110	168.5	165
2014	S2	3132	3132	Intervention	7	NA	0	36.5	1	NA	NA	1	1	1	M	20	Negative	1/11/2012	NA	0	1	1	3128	670	472	399.75	1157.5	422	160.75	9779	281	3196.75	5617.5	78	132.75	325	588.75	290.5	330.25	338.75	323
2014	S2	3132	3132	Intervention	7	NA	0	37	1	NA	NA	1	0	1	F	8	Negative	1/11/2012	NA	0	1	1	3190	2346.25	2572.5	1942.5	2950	4398	778.5	5923.25	370.75	3241.5	6307.5	1684.75	867	1197.5	1643	202.5	749.25	477.5	256.5
2014	S2	3132	3132	Intervention	7	NA	0	36.5	1	NA	NA	1	0	1	F	26	Negative	1/11/2012	NA	0	1	1	3382	1224.75	333	256.25	556	3439.75	113	976.25	294	578.25	2144	126.25	120.25	315	533	222.75	1344.25	323.5	297.5
2014	S2	3132	3132	Intervention	7	NA	1	37.4	0	1	NA	1	1	1	M	17	Negative	1/11/2012	NA	0	1	1	3173	208.75	87.75	106.25	484.5	1911	160	576.75	154.5	2304.5	4333.5	67	62	239	626.5	152.25	245.5	346	187.75
2014	S2	3132	3132	Intervention	7	NA	1	36.3	1	NA	NA	1	1	1	M	57	Negative	1/11/2012	NA	0	2	1	3345	248.5	79.5	149.5	404	599.75	72.25	4402.5	171.5	785	1472.5	65.25	110.25	247.25	491.5	130.25	146.5	140.75	158
2014	S2	3132	3132	Intervention	7	NA	0	36.8	1	NA	NA	1	0	1	F	50	Negative	1/11/2012	NA	0	1	1	3423	267.25	188	2565.25	661.25	1251.75	379.25	1912.75	468.5	1616.75	2199.5	302.75	99.5	573.5	661.5	321.5	467.75	401	362
2014	S2	3136	3136	Control	7	NA	1	36.5	0	0	NA	1	0	1	M	12	Negative	1/11/2012	NA	0	1	1	3326	54.25	103.5	92.75	303	215.5	62.25	1202	150.5	383.75	1147.75	56	54.5	441.25	384	149.25	131.5	169.5	169
2014	S2	3136	3136	Control	7	NA	1	36.6	0	0	NA	1	0	1	F	23	Negative	1/11/2012	NA	0	1	1	3151	231	628.5	2947.5	496	3253.5	162.25	12416.5	165	944.5	1770.5	81.75	58.5	230.75	298	143.5	236.75	190	160.5
2014	S2	3136	3136	Control	7	NA	1	36.4	0	0	NA	0	0	1	F	10	Negative	1/11/2012	NA	0	1	1	3182	57	98.75	751	473.5	5658.5	360	389.75	295.75	2798	4820.25	55.25	59.75	285.5	429	179.5	198.75	197.75	211
2014	S2	3136	3136	Control	7	NA	0	35.7	0	0	NA	1	0	1	F	24	Negative	1/11/2012	NA	0	1	1	3429	82.5	67.75	1227	355	108	57.25	812.75	197.5	450.5	1016.5	54	58.75	533	491	146.5	296.75	155.5	168.5
2014	S2	3136	3136	Control	3	NA	1	35.6	0	0	NA	0	1	1	M	60	Negative	1/11/2012	NA	0	1	1	2852	1030.5	1364.75	159.5	915	600	90.25	19571.5	355.5	2727.5	4869	404.75	733.25	562.25	614	248	528.5	293.5	324
2014	S2	3136	3136	Control	3	NA	1	36.9	0	0	NA	1	1	1	F	21	Negative	1/11/2012	NA	0	1	1	3134	192.75	1294.75	128	526.75	494.5	186.5	619.5	258.5	179.25	568	82.5	122.5	292.25	414	207.25	244	222.75	256
2014	S2	3136	3136	Control	7	NA	0	35	0	0	NA	1	1	1	F	32	Negative	1/11/2012	NA	0	1	1	2773	986.5	1605	8162.25	688.5	6948	123	11849.75	411	4597.75	8308.25	2079.5	464.5	1595.5	688.5	253	556	281.5	307.75
2014	S2	3136	3136	Control	7	NA	0	36.5	0	0	NA	0	0	1	F	29	Negative	1/11/2012	NA	0	1	1	3186	259	166	244.5	1018.5	286.25	128.5	2597.5	378	1023.75	2213	94.5	109	607.25	812.5	342.25	1120.5	452.5	382.25
2014	S2	3136	3136	Control	7	NA	0	37	0	0	NA	0	0	1	M	11	Negative	1/11/2012	NA	0	1	1	3700	89.75	130	173.5	397.5	84.5	101.75	534.5	272	114.5	211.5	269.75	87	393.75	589.5	371	208.5	308.5	313.25
2014	S2	3136	3136	Control	7	NA	0	36.8	0	0	NA	0	0	1	M	8	Negative	1/11/2012	NA	0	1	1	3315	99.25	151	217.75	545.5	235.25	235.5	153	356.5	154	245	83.25	92.5	347	522.75	369.5	361	379.25	352
2014	S2	3136	3136	Control	7	NA	0	35.6	0	0	NA	1	0	1	F	27	Negative	1/11/2012	NA	0	1	1	3237	258	150	216.25	827	1998.25	107.25	1015.5	383	395	698.75	696.5	253.25	692	802.5	377	501	387.5	432
2014	S2	3136	3136	Control	7	NA	1	36	0	0	NA	1	0	1	F	19	Negative	1/11/2012	NA	0	1	1	3095	356.5	759.25	127.5	578	6100.5	79.5	8031.5	559.25	7529	14705	56.75	75.75	2002	428.5	199.25	185.75	199.75	202.25
2014	S2	3136	3136	Control	7	NA	1	36.7	0	0	NA	1	0	1	M	12	Negative	1/11/2012	NA	0	1	1	3171	42.5	60.5	67	215.5	70.75	70.75	91.5	116.5	67.5	115.75	43	50	945.25	1008	105.75	124.25	143.75	127.75
2014	S2	3136	3136	Control	7	NA	1	36.3	0	0	NA	1	0	1	M	12	Negative	1/11/2012	NA	0	1	1	3036	96.5	1932	1490.25	6830.5	6014.75	419.5	11702	436.25	8615.75	16754	80.25	80.5	343	669.75	201	341.5	212.5	247.75
2014	S2	3136	3136	Control	7	NA	1	36.3	0	0	NA	1	0	1	M	22	Negative	1/11/2012	NA	0	1	1	3265	65.75	98.75	379.5	744	613.75	70	324.5	176.5	125	708.75	2232.75	95	342	356	168.25	192.75	187	204.75
2014	S2	3136	3136	Control	7	NA	1	36.3	0	0	NA	1	0	1	M	7	Negative	1/11/2012	NA	0	2	1	3246	71	94.5	115.75	591.25	66.5	80	80.75	204.25	112.75	101	74.25	73	301.5	511	213.75	460.5	401	352.5
2014	S2	3136	3136	Control	7	NA	1	36.3	0	0	NA	1	0	1	M	9	Negative	1/11/2012	NA	0	2	1	3175	60	98	119.5	403	52.25	68.5	68.75	181.5	87.5	76.5	63	67.75	234.75	368.75	200	207.25	268.75	227.75
2014	S2	3136	3136	Control	7	NA	1	36.5	0	0	NA	0	0	1	F	29	Negative	1/11/2012	NA	0	1	1	2943	1070.25	145.5	724.25	633.5	1307	139	3123.25	630.25	908	1918.75	1276.75	189.5	911.25	591.25	247.5	358.75	274	284.5
2014	S2	3136	3136	Control	7	NA	1	35	0	0	NA	0	0	1	F	9	Negative	1/11/2012	NA	0	1	1	3406	54.5	81	92.25	305.5	377	66.5	114.75	179	69	212	49	70.25	610	576.5	157.5	161.75	185	187.5
2014	S2	3136	3136	Control	7	NA	1	36.3	0	0	NA	1	0	1	F	30	Negative	1/11/2012	NA	0	1	1	2984	523.5	128.5	351.5	825.25	3043	152.25	15797.5	332.5	2372.5	7580	918	349.5	523.75	2254	434	282.5	228.5	244
2014	S2	3136	3136	Control	7	NA	1	36.3	0	0	NA	0	0	1	F	18	Negative	1/11/2012	NA	0	1	1	3191	116.5	1202.25	531	737.5	266.75	187.25	19022.25	337.75	906.5	2003	75.5	112.5	556.5	816.25	284.25	994	293	268.75
2014	S2	3136	3136	Control	7	NA	1	36.7	0	0	NA	1	1	1	M	18	Negative	1/11/2012	NA	0	1	1	3402	77.25	117.75	153.5	482	1468.25	86.25	347.75	274.5	151.25	331	78.25	77.5	411.75	584.5	251.25	299.5	321	276.5
2014	S2	3136	3136	Control	7	NA	1	36.3	0	0	NA	1	0	1	M	7	Negative	1/11/2012	NA	0	1	1	3314	57	73.75	98	313.5	86	60	519.5	169.75	217.5	764.5	63.5	67.5	383.25	447.5	147	154.5	172.25	159.75
2014	S2	3136	3136	Control	7	NA	1	35.9	0	0	NA	1	0	1	M	3	Negative	1/11/2012	NA	0	1	1	3352	57.75	80	112.25	316.75	57.5	63.25	55.25	177.75	70.5	79	48.5	65	154	284	179	167	202.5	216.75
2014	S2	3136	3136	Control	7	NA	1	35.6	0	0	NA	0	0	1	F	13	Negative	1/11/2012	NA	0	1	1	3122	232.25	595.75	170	497.5	1044.5	148	3064	319	1105.5	2916.5	59	81	456.5	633.5	259.75	243	260.5	277
2014	S2	3136	3136	Control	7	NA	1	34.4	0	0	NA	1	0	1	F	70	Negative	1/11/2012	NA	0	1	1	2855	1170.5	231.25	3836	1881.5	550.5	100.5	13903	406	6762.25	8850.5	654.25	303	814.5	4150	719.5	530.5	280.75	268.75
2014	S2	3136	3136	Control	7	NA	1	37.1	0	0	NA	1	0	1	M	8	Negative	1/11/2012	NA	0	1	1	3544	155.75	205.5	138.75	365.25	543	350	469.75	172.75	159.5	314.25	61	64.25	540.5	661.5	195.5	201.75	225.5	218.25
2014	S2	3136	3136	Control	7	NA	1	36.3	0	0	NA	1	0	1	F	5	Negative	1/11/2012	NA	0	1	1	3463	60.5	75.5	104	296	53	69.5	76	163.5	71.75	95.5	59.75	61	189.5	320	174.75	190.5	229.25	185
2014	S2	3136	3136	Control	7	NA	1	36	0	0	NA	1	0	1	F	8	Negative	1/11/2012	NA	0	1	1	3122	2785.5	127.25	841	5817.5	1292.25	298	6065.75	486.5	1056.5	11363.5	794.75	325.5	2149	1772.5	368.5	1508.75	299.75	337.75
2014	S2	3136	3136	Control	7	NA	1	36.7	0	0	NA	1	0	1	F	8	Negative	1/11/2012	NA	0	1	1	3236	156.75	178.5	238.75	632.5	96.25	129.5	326.5	396	NA	150	102.25	120.5	396	607.5	365	380.75	415.5	415.5
2014	S2	3138	3138	Control	3	NA	0	37	0	0	NA	0	0	1	M	25	Negative	4/11/2012	NA	0	1	1	3496	206.5	94	501.5	396.5	479	63.5	13266.75	269.25	1569.25	3746	71	91.25	244	350.5	160.25	314.5	207.5	180.5
2014	S2	3138	3138	Control	3	NA	0	36	0	0	NA	0	0	1	F	4	Negative	4/11/2012	NA	0	1	1	3206	49.5	75.75	97	283	65.75	66.75	65.75	154.5	59	89.5	44	51.5	132.75	243.75	146.5	148	158.25	165
2014	S2	3138	3138	Control	3	NA	0	36.5	0	0	NA	0	0	1	F	4	Negative	4/11/2012	NA	0	1	1	3359	51	73.5	99	284.75	50	64	47.5	158.25	57.25	168.25	47.5	54.5	156.5	279.25	159.75	134.5	190.75	172.25
2014	S2	3138	3138	Control	3	NA	0	36.4	0	0	NA	0	0	1	M	5	Negative	4/11/2012	NA	0	1	1	3447	36	49.5	55.5	153.75	34.75	39.5	36	78.25	38.5	37.5	36	38.5	97.5	176.5	90.75	78	104	100.25
2014	S2	3138	3138	Control	3	NA	0	36	0	0	NA	0	0	1	F	5	Negative	4/11/2012	NA	0	1	1	3577	53	80	106.75	263.5	59	67	54	163.75	52	111.75	47.75	54.5	233	372.5	182	127.5	181	187
2014	S2	3138	3138	Control	3	NA	0	36	0	0	NA	0	0	1	F	6	Negative	4/11/2012	NA	0	1	1	3636	37	52	62.25	180.5	36	49.75	45.25	100.75	41	45.5	40	44.75	135.75	186.25	110	229.5	122	119
2014	S2	3138	3138	Control	3	NA	0	37	0	0	NA	0	0	1	F	34	Negative	4/11/2012	NA	0	1	1	3242	758.25	733	93.75	7623.5	489.75	218	10292	191	687	10863.75	2185.25	708	971.75	279.5	172.5	383.75	213	188.5
2014	S2	3138	3138	Control	3	NA	1	36	0	0	NA	0	0	1	F	42	Negative	4/11/2012	NA	0	1	1	2934	204.75	247.5	2742.5	678	981.75	96.25	2555	375.5	2482	2963.75	541	134.5	474	332.5	162.25	628.5	173.5	170
2014	S2	3138	3138	Control	3	NA	0	36.2	0	0	NA	1	0	1	F	31	Negative	4/11/2012	NA	0	2	1	3356	237	78.25	533.25	297.25	1174.5	69	9817.25	188.75	2842	2837.5	736	93	323.25	257.5	143.75	143.25	153	146.75
2014	S2	3138	3138	Control	3	NA	0	36.1	0	0	NA	1	0	1	M	22	Negative	4/11/2012	NA	0	1	1	3061	77	87	140	475.75	107.5	69.5	924.75	173	338.5	1361.75	85	142.5	254.25	446.25	200.75	1117.75	234.5	196.25
2014	S2	3138	3138	Control	3	NA	0	36	0	0	NA	0	0	1	F	4	Negative	4/11/2012	NA	0	4	1	3389	29	39.25	41	48	37	60	41	46.5	29.75	37.5	32.5	67.5	81	92.75	58.25	63.5	49	52.5
2014	S2	3138	3138	Control	3	NA	0	36.5	0	0	NA	0	0	1	F	6	Negative	4/11/2012	NA	0	1	1	3420	57	86	111.75	356.5	4794.75	318.5	60	180	72.5	96	50.25	60.5	225.5	345.25	185.5	207.75	210	205
2014	S2	3138	3138	Control	3	NA	0	37	0	0	NA	1	1	1	M	22	Negative	4/11/2012	NA	0	1	1	2926	110.25	209	97.75	319	65.5	54.25	5888.5	134	2128	2387.25	363.75	65.5	365	432.25	146.25	233.5	166.5	175
2014	S2	3138	3138	Control	3	NA	0	37	0	0	NA	1	0	1	F	30	Negative	4/11/2012	NA	0	1	1	2922	1175.75	178.5	8364.25	1014.75	1112.5	148.75	7132.5	308	3254.25	5244.25	1076	749.5	881	1014	260	827	263.5	279
2014	S2	3138	3138	Control	3	NA	1	36	0	0	NA	1	0	1	M	23	Negative	4/11/2012	NA	0	1	1	3299	177.75	98.5	117.25	837.75	2609.25	307.5	54	179.75	714.5	1088	59.75	64	205.5	312.5	181.5	311	208.5	196.5
2014	S2	3138	3138	Control	3	NA	0	36	0	0	NA	0	0	1	F	70	Negative	4/11/2012	NA	0	2	1	3190	555.25	115	427	603.25	670	167.5	1420.5	235.75	730.5	1148.25	502.5	140.5	392.5	6177	236.5	280	302.5	265
2014	S2	3138	3138	Control	3	NA	0	36	0	0	NA	0	0	1	F	5	Negative	4/11/2012	NA	0	2	1	3117	87	110	131.75	375.5	63.75	78.5	84	197.5	89	80.75	66	76.5	214.5	364.5	201	222.5	274.5	223.5
2014	S2	3138	3138	Control	3	40.8	0	36	0	0	NA	1	0	1	M	27	Positive	4/11/2012	Pv	1	1	0	3312	1983	93	245.75	319.25	454	153.75	127	163	789.5	741.5	1339.25	3249.75	1491	273.75	151.75	250	157.5	158.75
2014	S2	3138	3138	Control	3	NA	0	37	0	0	NA	0	0	1	F	10	Negative	4/11/2012	NA	0	1	1	3074	51.5	72	86.75	231	79	65.75	114.5	132.25	88.25	131	45	67.25	150.75	218.5	134	115.5	158	151
2014	S2	3138	3138	Control	3	37.1	0	37	0	0	NA	1	0	1	F	16	Positive	4/11/2012	Pv	1	1	1	3046	128.25	73.5	97	354.25	6036.75	296.25	701	270.5	987.25	2388.5	65	64.75	252	419	190.5	156.75	197.25	189.5
2014	S2	3138	3138	Control	3	NA	0	36	0	0	NA	0	0	1	M	6	Positive	4/11/2012	Pv	1	1	1	3394	51.25	78.75	89	249	46.75	58.75	54.5	128	58	89	50	50	219.5	313.25	149.75	124.5	183.25	151.5
2014	S2	3138	3138	Control	3	NA	1	37	0	0	NA	1	0	1	F	45	Negative	4/11/2012	NA	0	1	1	3055	2832.25	150	345.75	620.5	4267.75	124	133	636	1629.5	4676.5	2450	310.75	1076.5	1576.25	315.25	622.75	396.5	389.25
2014	S2	3138	3138	Control	3	NA	0	35	0	0	NA	1	0	1	M	8	Negative	4/11/2012	NA	0	1	1	2811	84.5	160.5	214.25	661	1519.5	649	18381.75	373.5	6257.5	6368.5	70.75	79.5	320.5	1108.5	284.25	225.5	294	334.25
2014	S2	3138	3138	Control	3	NA	1	36	0	0	NA	1	0	1	F	16	Negative	4/11/2012	NA	0	1	1	3201	69	74.25	166	1071.75	525	60.5	635.5	122.75	1251	1981	201	65.25	277.5	348.5	128	265.75	163.25	148.25
2014	S2	3138	3138	Control	3	NA	0	37	0	0	NA	1	0	1	M	10	Negative	4/11/2012	NA	0	1	1	3267	69.5	67	80.5	242.75	46.5	55.5	53.25	136	55.25	85	42.75	49	125.25	380.5	129.5	123	150	140.5
2014	S2	3138	3138	Control	3	NA	0	35	0	0	NA	0	0	1	F	10	Negative	4/11/2012	NA	0	1	1	3285	50.75	77.25	151.25	329.25	2508.5	103	169.75	162.5	57.25	129	46	52.75	185.25	332	172	154	176	178
2014	S2	3138	3138	Control	3	NA	0	36	0	0	NA	0	0	1	F	60	Negative	4/11/2012	NA	0	1	1	3027	1973	130	1405.5	1067.25	305	98.5	5955.5	235.75	5829.5	8375.25	597.75	317.25	492.75	1166	335.5	400	186.5	289.5
2014	S2	3138	3138	Control	3	NA	1	37	0	0	NA	1	0	1	F	63	Negative	4/11/2012	NA	0	1	1	2445	1019	337.25	552.75	1279.75	1403.5	367.5	647.25	574	1771.5	1798	214	611	594.25	1744.25	501.25	558.75	673.5	664.75
2014	S2	3138	3138	Control	3	NA	1	36	0	0	NA	0	0	1	F	64	Negative	4/11/2012	NA	0	1	1	2375	1601	3074	648	804.5	3346.75	1067.5	9446.5	470	1772.75	5543.5	1758	358.5	1989.5	1452	432.25	963.75	564.5	525
2014	S2	3138	3138	Control	3	NA	1	37	0	0	NA	0	0	1	M	4	Negative	4/11/2012	NA	0	1	1	2683	87.5	94.75	107	275.75	66.75	74.25	73.5	146	81.5	63	68.25	68.5	157	274	150	152.25	263.25	182
2014	S2	3138	3138	Control	3	NA	0	36.4	0	0	NA	0	0	1	F	40	Negative	4/11/2012	NA	0	1	1	2386	422.75	150.5	1620.25	538.25	576.25	117	8206.5	234.5	1177.25	1786.25	232.5	121.5	425.5	441.75	232	353.25	279.5	272.5
2014	S2	3138	3138	Control	3	NA	0	37	0	0	NA	1	0	1	M	12	Negative	4/11/2012	NA	0	1	1	3005	157.5	169.5	216	480.75	483.5	329.5	217.75	285.5	174.5	225	119.5	144.75	397.75	510	291	273.75	338.5	360
2014	S2	3138	3138	Control	3	NA	0	36	0	0	NA	1	0	1	M	16	Negative	4/11/2012	NA	0	1	1	2669	165.25	186.75	498	569.25	803.75	233.75	628.5	325.25	291	324.5	111.5	126	329.5	549.75	313.5	877.25	369.75	381.5
2014	S2	3138	3138	Control	3	NA	0	36.5	0	0	NA	1	1	1	M	37	Negative	4/11/2012	NA	0	1	1	2438	954.5	778.25	260.5	528	2255.25	283	926.5	332.75	360	699.75	550	161	755.25	920.5	299.5	813.75	332	377.5
2014	S2	3138	3138	Control	3	NA	0	36	0	0	NA	0	0	1	F	36	Negative	4/11/2012	NA	0	1	1	2221	207.5	214.25	3123.25	636.25	395.75	289	161.5	324.5	3883.75	5471.25	143.5	152.75	428.75	988	328	420.5	692	484.5
2014	S2	3141	3141	Control	4	NA	1	37.3	0	NA	NA	1	0	1	F	10	Negative	30/10/2012	NA	0	1	1	2350	128.75	168	231.75	537	127.5	146.75	121	310.25	182.75	186.75	105.25	118.25	515.25	741.25	310.25	257.75	364.5	403.25
2014	S2	3141	3141	Control	4	NA	0	37.2	0	NA	NA	0	0	1	F	52	Negative	30/10/2012	NA	0	1	1	2313	991.75	261.5	2216.5	1066	2769	191.25	9976	415	3239.25	4619.5	170.75	194	340	1926.5	343.25	468.5	394.5	430.5
2014	S2	3141	3141	Control	4	NA	0	36.5	0	NA	NA	1	0	1	F	50	Negative	30/10/2012	NA	0	1	1	2669	469.5	253.75	416.5	901.75	675.5	184.25	1332.25	398.5	1734	1161.75	1378.5	601	847	1928.25	418.25	503.25	467.5	490.5
2014	S2	3141	3141	Control	4	NA	0	36.4	0	NA	NA	0	0	1	M	7	Negative	30/10/2012	NA	0	2	1	2594	138	183.5	217.5	465.5	132.5	146.25	142.25	283.25	187	149.25	117.5	123.25	265	456.75	277.25	281	394.25	345
2014	S2	3141	3141	Control	4	NA	0	36.7	0	NA	NA	0	0	1	M	11	Negative	30/10/2012	NA	0	1	1	2521	143.5	NA	NA	532.5	197.25	195.5	NA	301.5	187.5	127.5	120.25	126.75	341.25	560	311.5	NA	385	388.5
2014	S2	3141	3141	Control	4	NA	0	37.1	0	NA	NA	0	0	1	M	10	Negative	30/10/2012	NA	0	2	1	2115	188.75	259	299.75	691.5	172.75	200.25	177.25	410.75	368.5	238	162.75	166.75	580.25	825	424.25	378	488	484.25
2014	S2	3141	3141	Control	4	NA	0	36.5	0	NA	NA	0	0	1	F	10	Negative	30/10/2012	NA	0	1	1	2589	80	103	112	323.25	72.5	86.5	81.5	152.25	94	73.25	73.5	81.25	174.75	329.75	162.5	160	257.5	194.5
2014	S2	3141	3141	Control	4	NA	0	37.1	0	NA	NA	0	0	1	M	9	Negative	30/10/2012	NA	0	1	1	2487	164.75	160	190.75	487	122.5	129.25	117.25	246	146.5	126.25	117	116.75	313.5	524	279.25	248	394.75	336.5
2014	S2	3141	3141	Control	4	NA	0	36.7	0	NA	NA	0	0	1	F	80	Negative	30/10/2012	NA	0	1	1	2543	429.5	307.5	2593.25	952.25	365	165.75	5003	312.5	323.5	671.25	3264.75	269	1182.75	1115.25	306.75	401.5	390.25	472.5
2014	S2	3141	3141	Control	4	NA	0	37.2	0	NA	NA	1	1	1	M	45	Negative	30/10/2012	NA	0	1	1	2556	123.5	93	1896.25	245.75	2395.25	105.5	2959	95.5	616.5	1360.5	119.5	50.25	214.25	241.5	93.5	168	137.5	117.25
2014	S2	3141	3141	Control	4	NA	0	36.6	0	NA	NA	0	0	1	F	42	Negative	30/10/2012	NA	0	1	1	2515	132.25	161.75	1898.25	532	186.5	124.75	822.25	220	1031	1515.5	95	84.5	451.5	484.5	189.25	237	342	260.5
2014	S2	3141	3141	Control	4	NA	0	37.1	0	NA	NA	1	1	1	M	42	Negative	30/10/2012	NA	0	1	1	2191	746.25	354.5	4742.5	699.25	12969.75	670.5	224.5	325.5	275.75	17672	269	170.25	424.5	724.25	317.25	630.5	404.75	405.5
2014	S2	3141	3141	Control	4	NA	0	36.8	0	NA	NA	0	0	1	M	10	Negative	30/10/2012	NA	0	1	1	2556	101.5	143.5	195.75	489	205	117	187	251.5	117.5	233.25	91.75	98.5	245	429.5	252.5	204	319.25	307.5
2014	S2	3141	3141	Control	4	NA	1	36.2	0	NA	NA	0	0	1	F	8	Negative	30/10/2012	NA	0	1	1	2480	167.5	244.25	298.5	577.75	196.5	186.5	175	404.5	376.25	541	140.75	156	415.25	592	382	353.75	432	453
2014	S2	3141	3141	Control	1	NA	0	36.1	0	NA	NA	0	0	1	F	10	Negative	30/10/2012	NA	0	1	1	2500	181.75	228.5	283.5	684	208.25	213.5	166	383.5	228.5	206	145.25	151.5	591.5	730	389.25	360.5	540	484.5
2014	S2	3141	3141	Control	1	33.8	0	37.2	0	NA	NA	0	0	1	M	33	Positive	30/10/2012	Pv	1	1	1	2381	121.5	137.5	162.5	526.25	217.5	126	128.75	257	739	951.75	135.75	98	365	658.25	254.25	351	449.5	494
2014	S2	3141	3141	Control	1	NA	0	36.5	0	NA	NA	0	0	1	F	2	Negative	30/10/2012	NA	0	1	1	2547	91.5	122.5	142	325.25	94	99	92.5	192.25	114.75	83	92.75	93	183.75	331	191.5	182	261	235.75
2014	S2	3141	3141	Control	4	NA	0	37.1	0	NA	NA	0	0	1	F	65	Negative	30/10/2012	NA	0	1	1	2432	1509.25	119.25	1711	961	1106.75	87.5	3351.5	208.5	920	1489	363.75	835	403.5	1028.5	333.5	371.5	242	227.75
2014	S2	3141	3141	Control	4	NA	1	37.2	0	NA	NA	0	0	1	F	38	Negative	30/10/2012	NA	0	1	1	2263	342	454.5	1210.25	927.5	1644.5	205.5	4954.5	423.5	530.75	698.25	167.5	144.25	443.75	749	407	426.5	499	492.5
2014	S2	3141	3141	Control	4	NA	0	37.3	0	NA	NA	1	0	1	F	20	Negative	30/10/2012	NA	0	1	1	1752	615.25	1760.5	780	960.5	177.75	152.5	11955	268	4241.75	7446.5	1915.75	140	1473.25	1560	212	2204.5	516.5	669.75
2014	S2	3141	3141	Control	4	NA	0	36.2	0	NA	NA	1	0	1	F	37	Negative	30/10/2012	NA	0	1	1	2589	106.5	140	96.5	259	71.5	64	1199.5	122.75	177.25	291.75	70	64.5	135.5	192.5	122.5	208	181	153.5
2014	S2	3141	3141	Control	4	NA	0	36.7	0	NA	NA	0	0	1	M	7	Negative	30/10/2012	NA	0	1	1	2285	101	129	155.25	561	172	160.75	102.5	216	120	124	102.75	97	302.5	971	831.5	208.5	296	307.5
2014	S2	3141	3141	Control	4	NA	0	37.3	0	NA	NA	1	0	1	F	50	Negative	30/10/2012	NA	0	1	1	2537	294.5	266.25	1662.5	1094	276.5	190	713.5	561	703	1026.5	205.25	421	836.25	1053	440	1013.25	553.75	578.75
2014	S2	3141	3141	Control	4	NA	0	37.2	0	NA	NA	0	0	1	F	70	Negative	30/10/2012	NA	0	1	1	2226	341.75	2637.25	280.75	964.75	553.75	907.5	19388.25	394	5554	5939.75	166.5	142.75	355	635.5	347.75	2092.25	427.5	434.25
2014	S2	3141	3141	Control	4	NA	0	37.1	0	NA	NA	0	0	1	M	10	Negative	30/10/2012	NA	0	1	1	2417	119.5	154.25	182	463.75	105.25	132	167.5	229	146	131.5	96.25	113	317.5	484	239.5	262.25	426	307.5
2014	S2	3141	3141	Control	4	NA	0	37.5	0	NA	NA	1	0	1	F	75	Negative	30/10/2012	NA	0	1	1	2263	1225.5	449	885.25	1012	1858.75	1061	4436	430	959.75	1634.25	284.5	218.5	504	1145.25	331.5	466.5	456.75	399
2014	S2	3145	3145	Control	4	NA	0	36	0	0	NA	1	0	1	F	27	Negative	31/10/2012	NA	0	3	1	2562	1758.25	1500.5	3008.25	604.5	NA	255	10623.5	237.25	332.75	12726.25	745.25	476	969	921	433.75	458.5	111.75	98.5
2014	S2	3145	3145	Control	4	NA	1	36.4	0	0	NA	0	0	1	M	4	Negative	31/10/2012	NA	0	1	1	2391	119.75	150.5	177.75	459.75	166	146	134.75	257	128	121	100.5	105.5	316.75	493.75	251	232.75	322.5	313.25
2014	S2	3145	3145	Control	4	NA	0	36.1	0	0	NA	1	0	1	F	4	Negative	31/10/2012	NA	0	1	1	2389	149.5	199.5	264.5	548	1330	561.5	159.25	320	204	313	136.5	134.5	655.75	740	347.5	313.5	468	437.25
2014	S2	3145	3145	Control	4	NA	0	36	0	0	NA	1	1	1	M	60	Negative	31/10/2012	NA	0	1	1	2174	581.25	251	430.75	1007.5	762	201.25	17182.25	467.75	6481	8247	198.75	169	444.75	990.75	391.25	438.25	489.5	470.5
2014	S2	3145	3145	Control	4	NA	0	36	0	0	NA	0	0	1	F	9	Negative	31/10/2012	NA	0	1	1	2386	451.5	NA	1629.25	647.5	2594.5	160	5203	339.5	1146.5	3291.25	124.5	163	NA	712.5	352	NA	372	453
2014	S2	3145	3145	Control	4	24.11	1	37.1	0	0	NA	1	0	1	F	4	Positive	31/10/2012	Pv	1	1	1	2363	124	167.75	181.5	474.75	113.5	136.5	152.5	301	172.75	234.5	NA	121	390	530.75	387.25	269.75	354	309.5
2014	S2	3145	3145	Control	4	NA	0	36.4	0	0	NA	1	0	1	F	38	Negative	31/10/2012	NA	0	1	1	2036	1919.5	204.5	726.25	1189	1177	374.75	13221.75	330.75	779.5	23832.5	1466	161.5	1494.25	1057	758.25	372.5	357	404
2014	S2	3145	3145	Control	4	NA	1	36.1	0	0	NA	1	0	1	F	5	Negative	31/10/2012	NA	0	1	1	2449	158.5	207.75	273.75	668.25	247	214	131.5	369	174	304.5	121.75	157.5	349	665	362.5	338.25	453.25	462.75
2014	S2	3145	3145	Control	4	NA	0	36.3	0	0	NA	1	1	1	F	9	Negative	31/10/2012	NA	0	1	1	2450	136.25	170.5	230.25	481.25	698	523.25	158.25	284.75	233	231.5	113.75	122.5	320	506.25	277.5	496.5	365	325.75
2014	S2	3145	3145	Control	4	NA	0	36.5	0	0	NA	0	0	1	F	3	Negative	31/10/2012	NA	0	1	1	2333	139	163.5	236.25	506	132	141	161	273.5	293.5	523.5	110.25	123.75	369	542.75	363.5	259.5	336	332
2014	S2	3145	3145	Control	4	NA	0	36.3	0	0	NA	1	0	1	M	2	Negative	31/10/2012	NA	0	1	1	2484	32.75	39.5	38	76.5	37.5	36.5	41	54.5	35.5	43.25	38.5	47.25	80	118.5	57.5	56.5	72.25	67.5
2014	S2	3145	3145	Control	4	NA	0	37	0	0	NA	1	0	1	F	10	Negative	31/10/2012	NA	0	1	1	2371	114.5	146.75	179.5	467.25	284.25	1951	155.25	235.25	856.25	174.5	112	115.5	412.75	626	880.5	236	318.25	710.25
2014	S2	3145	3145	Control	4	NA	0	36	0	0	NA	1	0	1	M	10	Negative	31/10/2012	NA	0	1	1	2155	3975.25	3368	1449.5	2433	16813.5	589.5	29850.75	861	2251.5	32926.75	174	165.25	669.5	1880	743.75	591	598	684.5
2014	S2	3145	3145	Control	4	NA	0	36.1	0	0	NA	1	1	1	F	3	Negative	31/10/2012	NA	0	1	1	2563	120.25	146.5	184	417	844.25	476.5	217	266.5	157	297	96.5	104	232.25	553.25	246.25	248.5	324.25	290.75
2014	S2	3145	3145	Control	4	NA	0	36	0	0	NA	1	1	1	M	25	Negative	31/10/2012	NA	0	3	0	2497	490.5	51.5	123	124.75	777.25	50	794.5	78	1115.25	935.75	245.75	84.5	451.75	446.5	209.25	142.25	64.5	60.5
2014	S2	3145	3145	Control	4	NA	0	37	0	0	NA	0	0	1	F	23	Negative	31/10/2012	NA	0	2	1	2232	853.75	533.25	1193.5	1609	1417.75	1169	5620.5	300	1648.5	4975.75	958	172	766.75	570.5	307.5	1240.5	346.25	371.75
2014	S2	3145	3145	Control	4	NA	0	36.3	0	0	NA	1	1	1	M	63	Negative	31/10/2012	NA	0	1	1	2186	7575	2758	8309.25	2665	5011.5	194	19380.25	435.25	9710.75	13558.5	553.5	260.75	1431.5	1401	1548.75	1388.5	439.5	447.5
2014	S2	3145	3145	Control	4	NA	0	36.3	0	0	NA	1	1	1	M	28	Negative	31/10/2012	NA	0	1	1	2289	1323	470	1149.5	2191.5	1109	148.25	6939.75	371.25	10206	10665.75	433.75	333.25	485.25	932.5	346	942.5	341	473
2014	S2	3145	3145	Control	4	NA	0	37	0	0	NA	0	0	1	F	13	Negative	31/10/2012	NA	0	1	1	2172	129	409	2410	540.5	2285.25	136	847	294	2807	2563.5	108	126	272.5	672	272.25	258.5	303	324.5
2014	S2	3145	3145	Control	4	NA	0	37	0	0	NA	1	1	1	M	70	Negative	31/10/2012	NA	0	1	1	2316	437	463.5	834.75	1170	330.5	248.5	8689	939	2276.5	2793.75	235	266.75	1111.75	1378.25	836.5	617.5	732.25	898.75
2014	S2	3145	3145	Control	4	NA	0	35.5	0	0	NA	1	1	1	F	30	Negative	31/10/2012	NA	0	1	1	2076	1340.5	1477.5	617.25	1025.5	8430.25	563	9771.5	591.5	24694.5	25152.5	873	2910.5	1020.75	1075	518.75	919.75	553.5	640.25
2014	S2	3145	3145	Control	4	NA	1	36.1	0	0	NA	1	1	1	M	26	Negative	31/10/2012	NA	0	1	1	2361	1557.25	577	454.5	1196.25	216	139.5	7379.5	324	4875	5448	1039.75	501.5	500.75	1942	531	2137.25	339.5	318.5
2014	S2	3145	3145	Control	4	NA	0	36	0	0	NA	0	0	1	M	2	Negative	31/10/2012	NA	0	1	1	2389	59	78	90.5	247.5	59	63.25	80.25	128	74	94.5	53.5	57.5	128.25	249.25	130.5	114.75	168.5	161.5
2014	S2	3145	3145	Control	4	41.5	0	37	0	0	NA	1	1	1	M	13	Positive	31/10/2012	PfPv	2	1	1	1930	1873	10988.5	342.25	4276.75	12286.5	621.75	15000.5	464.5	7266	25442	203	238	539.25	1108.5	358.5	517.5	450.5	469
2014	S2	3145	3145	Control	NA	NA	0	36	0	0	NA	NA	NA	NA	M	75	Positive	31/10/2012	Pf	1	1	1	1928	8384.5	2661.75	309.5	3050	4125	169.5	11527.75	467.75	16901.25	19294.75	244.5	262.75	585.5	1076	1717.75	812.25	500.75	487.75
2014	S2	3145	3145	Control	4	36.9	1	36.3	0	0	NA	1	1	1	M	8	Positive	31/10/2012	PfPv	2	1	1	2296	459.5	686.5	2260	835	932.25	319	4039	364.75	1721.5	4759.25	101	202	491.5	692.5	253.5	405.25	342	363.75
2014	S2	3145	3145	Control	4	NA	1	36.1	0	0	NA	1	1	1	M	27	Negative	31/10/2012	NA	0	2	1	2212	196.5	903.5	174.25	868	819.25	495.75	4729.5	183.75	3398.5	5217.25	154.5	172	287.5	483.75	183	854	267.5	221.75
2014	S2	3145	3145	Control	4	NA	0	37	0	0	NA	1	0	1	F	24	Negative	31/10/2012	NA	0	2	1	2211	900.5	1191.5	1280.5	1078.5	287.25	266.5	4437	562	662.25	918	175.5	1056.25	725.5	959.25	2855	1519.5	649	660.75
2014	S2	3145	3145	Control	4	NA	0	36	0	0	NA	1	0	1	F	6	Negative	31/10/2012	NA	0	1	1	2252	147.5	187.5	279	655	512.75	238.75	825.25	362.25	267.75	294.5	115.5	128.5	366.75	751.5	331	350	521.5	411.75
2014	S2	3145	3145	Control	4	NA	1	36.4	0	0	NA	0	0	1	F	3	Negative	31/10/2012	NA	0	1	1	2277	81	101.75	109.5	309.5	112.5	84	267	158.25	114.25	286.75	71	71.5	152.5	287	195.5	174.5	233	184.5
2014	S2	3145	3145	Control	4	NA	0	36	0	0	NA	1	0	1	F	34	Negative	31/10/2012	NA	0	1	1	2509	121.5	176.75	288.5	588.75	127	153.25	789.5	337.5	156	191.75	279.25	178.5	451	638.5	343	350.5	384.25	367.25
2014	S2	3146	3146	Control	7	NA	1	35.4	0	0	NA	1	0	1	M	23	Negative	31/10/2012	NA	0	1	1	2632	248	205.5	1201	493	1091.5	286.25	2303.75	239.25	2833.75	3122	93.5	97.75	232.5	382	207	294.5	292.25	269.5
2014	S2	3146	3146	Control	7	NA	0	36.1	0	0	NA	1	0	1	F	3	Negative	31/10/2012	NA	0	2	1	2491	93.25	107.75	125	376.5	95	99	87.5	175.5	112.5	89	72.5	80.5	207.5	359.5	182.25	209	342.75	267.75
2014	S2	3146	3146	Control	7	NA	0	35.4	0	0	NA	0	0	1	F	36	Negative	31/10/2012	NA	0	1	1	2506	1356.75	1317.5	410.75	1610.25	1487.5	486.75	6871.5	596.25	3015.25	7353.5	566.5	519	916.75	1102	476.5	576	599	596
2014	S2	3146	3146	Control	7	NA	0	36.3	0	0	NA	0	0	1	F	22	Negative	31/10/2012	NA	0	1	1	2404	639	126.25	304.5	409	1260.5	89	1140	182.25	1504	2325	342.5	79	233.5	272.75	166	193	211.75	196
2014	S2	3146	3146	Control	7	NA	0	36.3	0	0	NA	1	1	1	M	33	Negative	31/10/2012	NA	0	3	1	2777	398.5	60	53	122	163.5	95	304	53.25	180.25	374	606.5	461.5	197.75	96	52	58	47.5	45
2014	S2	3146	3146	Control	7	NA	0	35.7	0	0	NA	0	0	1	M	16	Negative	31/10/2012	NA	0	1	1	2424	110.25	110.5	390.75	466.5	911	106	1508.25	200	653.75	1765	77.25	81	240.25	414.75	204	322	271.5	239.25
2014	S2	3146	3146	Control	7	NA	0	36.5	0	0	NA	0	0	1	M	26	Negative	31/10/2012	NA	0	3	0	2952	177.75	141	1342.25	191.5	255.25	51	4808	151.25	3995	5880.25	109	59	136	272	75.5	393.25	60.5	59
2014	S2	3146	3146	Control	7	NA	0	35.6	0	0	NA	1	0	1	M	32	Negative	31/10/2012	NA	0	1	1	2491	450.5	137.25	123.25	301	261	91.5	484.5	158.75	898.5	1134.5	1048.25	185	585	435.5	166.75	288.5	195	198
2014	S2	3146	3146	Control	7	NA	0	35.1	0	0	NA	0	0	1	M	58	Negative	31/10/2012	NA	0	3	0	3130	691	1106.5	61.25	2972.5	1222.5	48.75	23343.75	101	3151	NA	712.75	490	326.5	370.75	79.25	102.5	68.25	67.25
2014	S2	3146	3146	Control	7	NA	0	35.7	0	0	NA	1	0	1	F	16	Negative	31/10/2012	NA	0	1	1	2613	89.5	120.5	150	389.5	90	100	105.75	216.5	106.25	115	88	104	289.25	411.75	221.25	217	274.25	280.5
2014	S2	3146	3146	Control	7	NA	1	36	0	0	NA	0	0	1	M	60	Negative	31/10/2012	NA	0	1	1	2574	2122.5	666	284.75	1078.5	1656	135	2227	297.25	1469.5	2318.75	1905.25	1030	1044	882.25	289.5	669.75	369.25	317.75
2014	S2	3146	3146	Control	7	NA	0	35.6	0	0	NA	1	0	1	M	24	Negative	31/10/2012	NA	0	1	1	2804	139.25	175.5	209	688.5	182	176.75	438.75	282.5	805	193	105.5	419.5	479.25	1093.75	311	277.5	360.25	349.5
2014	S2	3146	3146	Control	7	NA	0	34.8	0	0	NA	1	0	1	F	22	Negative	31/10/2012	NA	0	1	1	2366	134.75	127	147	359	96.5	98.5	1109.75	210.25	179.75	350.25	82	88.25	247.5	382.5	210	220	278.25	250.5
2014	S2	3146	3146	Control	7	NA	0	36.1	0	0	NA	0	0	1	F	69	Negative	31/10/2012	NA	0	1	1	2439	230	172.5	NA	608.5	380	133.25	2098.75	283.5	596.5	1263.5	262	NA	377.25	469	271.5	400	377.5	334.75
2014	S2	3146	3146	Control	7	NA	0	35.8	0	0	NA	0	0	1	M	6	Negative	31/10/2012	NA	0	1	1	2555	96	101	109	307	86	84.75	121	168	84	64	63.5	71	218.25	311	166.75	178.5	206.5	202.5
2014	S2	3146	3146	Control	7	NA	1	34.7	0	0	NA	0	0	1	M	23	Negative	31/10/2012	NA	0	1	1	2668	304.75	188.5	216.5	520.75	2517	348	759.25	263.25	401.75	731	97.5	121.5	329.5	539.5	251	289.25	308	305.75
2014	S2	3146	3146	Control	7	NA	0	34.8	0	0	NA	0	0	1	M	2	Negative	31/10/2012	NA	0	1	1	2564	57	71.5	86	238.5	136.75	86.25	54.5	117.5	56.75	50.75	49.75	56.5	120	218.75	118.5	108.25	157	157.5
2014	S2	3146	3146	Control	7	NA	0	35.8	0	0	NA	1	0	1	M	8	Negative	31/10/2012	NA	0	1	1	2477	NA	NA	153.25	373.5	349.25	96.5	103.75	185	118	273.5	NA	92.75	352.5	511.5	190.25	186.75	245	254.25
2014	S2	3146	3146	Control	7	NA	1	37	0	0	NA	1	0	1	M	5	Negative	31/10/2012	NA	0	1	1	2701	71.25	98.5	115	310.25	96.25	84.25	72.5	157	79.5	73.75	64.5	77	191	314.25	161	146.75	212	207.25
2014	S2	3146	3146	Control	7	NA	0	35.2	0	0	NA	1	0	1	M	2	Negative	31/10/2012	NA	0	1	1	2441	119.5	157.75	NA	484.5	107.75	128.5	120.75	298.75	NA	NA	97.25	107.5	NA	621.5	NA	264.75	367.75	369.5
2014	S2	3146	3146	Control	7	NA	0	35.4	0	0	NA	0	0	1	F	7	Negative	31/10/2012	NA	0	2	1	3559	60.5	87	105.5	272.25	96.5	86.25	66	152.75	74.25	89.5	59	72.5	175.75	283.5	163	133.5	187	181.5
2014	S2	3146	3146	Control	7	NA	1	36.1	0	0	NA	0	0	1	F	6	Negative	31/10/2012	NA	0	1	1	3577	61	83	99.25	280.25	261.5	300	56	146.5	69	62	55.5	63.5	216.25	303.75	151	134.25	177.5	169.25
2014	S2	3146	3146	Control	7	NA	1	36.5	0	0	NA	0	0	1	M	44	Negative	31/10/2012	NA	0	1	1	3246	644	263.5	309	845.5	250.5	207.5	283.5	498.5	333.5	443	311.75	191.5	483.25	827.25	459	519.25	571.75	537.5
2014	S2	3146	3146	Control	7	NA	0	35.4	0	0	NA	0	0	1	M	22	Negative	31/10/2012	NA	0	1	1	3431	397	191	152.25	376	419	130.75	1031	214.5	3257.5	3214.5	536.75	196.5	340.5	390.5	203.5	624.25	204	222.5
2014	S2	3146	3146	Control	7	NA	0	36	0	0	NA	1	0	1	M	22	Negative	31/10/2012	NA	0	1	1	3510	514.25	86.5	101	270.25	1598.75	282.75	314.25	126	1345	1107.5	92.75	70.5	181.5	276.75	134.75	567.5	147.5	154.75
2014	S2	3146	3146	Control	7	NA	1	38	0	0	NA	0	0	1	M	5	Negative	31/10/2012	NA	0	1	1	3734	109.5	153.5	174.25	434	135.5	178.75	133.5	240	125	140	114.5	138.25	442.25	603	247	211.25	300.5	313.75
2014	S2	3146	3146	Control	7	NA	0	35.1	0	0	NA	1	0	1	M	11	Negative	31/10/2012	NA	0	1	1	3545	72.25	89.75	181.5	482.5	1131	109.5	244	211.25	733.5	1077.5	62.5	70.5	186.5	282.25	168.75	141	195.5	185.25
2014	S2	3146	3146	Control	7	NA	0	35.6	0	0	NA	0	0	1	F	15	Negative	31/10/2012	NA	0	1	1	3210	1146.5	224.5	775	887.75	127	164.5	546.75	414.75	576.5	879	NA	186.75	925.25	953.25	502.25	987.75	690	451.75
2014	S2	3146	3146	Control	7	NA	0	34.7	0	0	NA	0	0	1	F	20	Negative	31/10/2012	NA	0	1	1	3518	947.25	100.25	788	484.5	118.25	76	775.25	163.25	137.75	1854.5	113	88.25	180	310.25	179.75	216.5	230	190.5
2014	S2	3146	3146	Control	7	NA	0	35.1	0	0	NA	0	0	1	M	12	Negative	31/10/2012	NA	0	1	1	3731	59	74.75	88	219	88.5	76.5	54.5	117	74.75	77.25	58.5	62.5	177.5	238.25	125.25	107.5	154	141.75
2014	S2	3146	3146	Control	7	NA	1	35.5	0	0	NA	0	0	1	M	67	Negative	31/10/2012	NA	0	1	1	3671	1353	184.75	755	495.5	818.25	84.25	1335.25	198.25	941.5	1363	533.5	908.5	610.75	529.5	207.25	487.5	225.75	217
2014	S2	3146	3146	Control	7	NA	1	35.9	0	0	NA	1	1	1	M	42	Negative	31/10/2012	NA	0	1	1	3332	1121.5	218.5	369.5	418.75	4933.5	212.5	2088	181.5	5059.75	7668.75	914.25	396.75	487.75	323.25	157.25	314.5	188.5	196
2014	S2	3146	3146	Control	7	NA	1	37.2	0	0	NA	1	0	1	F	27	Negative	31/10/2012	NA	0	1	1	3320	644.5	183	509.75	389	965.75	110.5	1026.5	243.5	137	3040	105	105.5	230.5	601	205.5	273	241.75	240.25
2014	S2	3146	3146	Control	7	NA	0	35.7	0	0	NA	1	0	1	F	5	Negative	31/10/2012	NA	0	1	1	3417	90.5	119.5	141	384.75	87.5	116.75	94.75	233.5	115.25	123.5	193.5	146	189	306.75	211.5	282	297.25	258.5
2014	S2	3146	3146	Control	7	NA	1	37.1	0	0	NA	1	0	1	M	3	Negative	31/10/2012	NA	0	1	1	3367	50.25	70	79.5	204	49	61	60	109	52.25	55.5	54	58	204.5	247.5	120	97.5	137	132.75
2014	S2	3146	3146	Control	7	NA	1	36.7	0	0	NA	0	0	1	M	7	Negative	31/10/2012	NA	0	1	1	3396	74.75	100.5	106.5	268.5	245.5	100	102.5	178	84.5	160.25	69.75	75	209.5	277.75	150.75	138.25	190.75	181.75
2014	S2	3146	3146	Control	7	NA	0	35.2	0	0	NA	1	0	1	F	16	Negative	31/10/2012	NA	0	1	1	3409	78	111.5	140	323.75	93.5	87	125.25	178.25	149	309.5	76.5	108.5	382	527.5	191.5	207.75	220	233.25
2014	S2	3146	3146	Control	NA	NA	1	36.5	0	0	NA	NA	NA	NA	F	55	Negative	31/10/2012	NA	0	1	1	3865	598	99	118	278.25	139	72	711.5	199	210	271.75	199.25	123	313	363.5	257	179	178.5	163.25
2014	S2	3146	3146	Control	7	NA	0	36.3	0	0	NA	0	1	1	M	30	Negative	31/10/2012	NA	0	1	1	3060	181.5	145	156	379.5	158.5	170	408.25	214	548.25	1215	94.75	101	303.5	413.75	234	895.5	261.5	258.25
2014	S2	3146	3146	Control	7	NA	0	35.4	0	0	NA	0	0	1	F	30	Negative	31/10/2012	NA	0	1	1	3003	194.25	97.75	176.75	276	201.75	91	12930.75	226.5	446.75	1523.5	150.5	155.25	262.75	604.5	293	143.25	176	156
2014	S2	3146	3146	Control	7	NA	0	34.5	0	0	NA	0	0	1	F	5	Negative	31/10/2012	NA	0	1	1	3523	64.5	82	91	222	59.75	69	60.5	125.5	68.5	60.25	75.5	74.25	132	211.5	133.25	124	152	151
2014	S2	3147	3147	Intervention	4	NA	1	35.6	0	NA	NA	1	0	1	M	10	Negative	30/10/2012	NA	0	2	1	3480	335	188.5	1124.5	672.25	801.5	91	1852.5	169.5	1704	3716	321	274.5	480	330	181.5	163.5	190	191.5
2014	S2	3147	3147	Intervention	4	NA	0	36.5	1	NA	NA	1	0	1	M	7	Negative	30/10/2012	NA	0	2	1	3398	90.5	340.25	143	377.25	104.5	97	705	237.5	560	959	81	80.25	337.5	427.5	202	359.5	238	257.5
2014	S2	3147	3147	Intervention	NA	NA	0	35.1	0	NA	NA	NA	NA	NA	F	58	Negative	30/10/2012	NA	0	3	0	2728	1272	83	2983	933.5	7258.75	165	13226.5	251.5	9355	9988.5	237	389.5	622.5	431	146.5	11366.5	83.5	111.25
2014	S2	3147	3147	Intervention	4	NA	0	36.7	1	NA	NA	1	0	1	F	6	Negative	30/10/2012	NA	0	1	1	3336	129	172	219	549.5	128.75	144	136.25	321.75	166.25	134.75	119.5	164.75	864.5	896.25	330.5	294.75	388.75	387.75
2014	S2	3147	3147	Intervention	4	NA	0	36.1	1	NA	NA	1	0	1	M	4	Negative	30/10/2012	NA	0	1	1	3834	117.25	141.5	218.5	439.75	139.25	123	134.75	249	153	128.25	104.5	107.5	648.75	700.5	248.25	220.25	308.75	286
2014	S2	3147	3147	Intervention	4	NA	0	35.6	0	1	NA	1	0	1	F	38	Negative	30/10/2012	NA	0	2	1	3125	1175.25	148.75	215.75	1242.25	895.5	119.5	18923	347	5328	12327.5	2542.75	243.5	1342.5	782.5	474.75	416	293.25	334.75
2014	S2	3147	3147	Intervention	4	NA	0	36	1	NA	NA	1	0	1	F	20	Negative	30/10/2012	NA	0	1	1	3407	191	127.75	167	450.5	359	114	552.5	227	1047.5	1487	102	118	309.5	499.75	224.5	338.5	255.25	321.25
2014	S2	3147	3147	Intervention	4	NA	1	35.4	0	0	NA	1	0	1	F	45	Negative	30/10/2012	NA	0	3	0	2708	701.5	109	765	1531.5	11452.75	285.75	19446.75	221	4712.25	9005.75	1356	438.25	576.25	399.5	166.5	123	105.5	93
2014	S2	3147	3147	Intervention	4	NA	1	36.5	0	NA	NA	1	0	1	F	40	Negative	30/10/2012	NA	0	1	1	3153	99	145	624	333.75	518	169	255	193	662.25	945.5	92.25	90	250	389.5	192.25	208.5	209	207.75
2014	S2	3147	3147	Intervention	4	NA	0	35.7	0	1	NA	1	0	1	F	4	Negative	30/10/2012	NA	0	1	1	3717	65	88	100.5	254	56	76	64	137.5	73	81.5	58.25	65.5	157.75	241.25	158.5	126.5	165.75	173.25
2014	S2	3147	3147	Intervention	4	NA	0	35.7	1	NA	NA	1	0	1	M	35	Negative	30/10/2012	NA	0	1	1	2949	1257.5	1003	22142.25	973.5	597.5	177.75	10018.5	229	1679	4891	312	297.5	568.5	726.75	218	1009.5	292.75	260.75
2014	S2	3147	3147	Intervention	4	NA	0	35.6	1	NA	NA	1	0	1	F	6	Negative	30/10/2012	NA	0	2	1	3449	82.75	172.75	143	339	156.5	98.25	657	178.5	860.5	313.5	75.75	110	661.5	574.5	189.5	174.25	226.5	220.75
2014	S2	3147	3147	Intervention	4	NA	1	36.1	0	NA	NA	1	0	1	M	14	Negative	30/10/2012	NA	0	1	1	3317	304	340	733	723.5	1970.5	379.5	1688.25	581.5	1816	2346	2120.25	169.25	1048	754.5	467	535	470.75	491
2014	S2	3147	3147	Intervention	4	NA	1	35.6	0	NA	NA	1	1	1	M	30	Negative	30/10/2012	NA	0	3	1	2612	1846.25	78.25	7812.75	1982.25	19951.75	316	12932	484.75	11950.5	17082	94	533.5	252.5	2077.75	368	646.5	127	99
2014	S2	3147	3147	Intervention	4	NA	0	36.1	0	1	NA	1	1	1	M	39	Negative	30/10/2012	NA	0	1	1	3007	NA	372	1065.5	932.5	371.5	518.75	27810	417.25	NA	NA	331.75	NA	825.5	958.5	483.5	18399.5	374	391
2014	S2	3147	3147	Intervention	4	NA	0	36.3	0	1	NA	1	0	1	F	29	Negative	30/10/2012	NA	0	1	1	3445	296	553	2179.25	683	989.75	96	NA	228	342.5	1061.5	417.75	313.75	386.75	395.25	203.75	222.5	247	249.75
2014	S2	3147	3147	Intervention	4	NA	1	35.6	0	1	NA	1	0	1	M	11	Positive	30/10/2012	Pv	1	1	1	3377	141.5	109	127	374	1094.5	1043	995	193	160.5	352	86.75	78.25	390	514.75	188.75	157.75	218	222.75
2014	S2	3147	3147	Intervention	4	NA	0	35.7	1	NA	NA	1	0	1	F	3	Negative	30/10/2012	NA	0	1	1	4218	78	86.5	98.75	302	63.75	67.5	133.5	136	98.5	213	59.5	63.5	211.5	295	141.75	121.5	164.75	161.75
2014	S2	3147	3147	Intervention	4	NA	0	35.3	0	1	NA	0	0	1	M	12	Negative	30/10/2012	NA	0	1	1	3712	142	104.75	141.5	437.5	72.25	81.5	161.5	212.75	115.75	430.5	68	72.5	219	358.25	211.5	250	231	233.75
2014	S2	3147	3147	Intervention	4	NA	1	35.2	0	1	NA	1	0	1	F	6	Negative	30/10/2012	NA	0	1	1	3582	NA	95.5	137.25	258.5	102.5	77	NA	145.5	NA	80.75	NA	101.5	320	370.25	153.5	141	171.5	169.75
2014	S2	3147	3147	Intervention	4	NA	0	36.2	1	NA	NA	1	0	1	F	48	Negative	30/10/2012	NA	0	2	1	3428	491	391.25	677	435.5	455.5	116.5	1738.75	265.25	498	693	216.25	168.75	293	488.5	187	488.5	223	231
2014	S2	3147	3147	Intervention	4	NA	1	36.5	0	NA	NA	1	1	1	M	39	Negative	30/10/2012	NA	0	2	1	3464	NA	179.25	NA	566.5	NA	165.75	NA	313	NA	NA	108.25	119	332	518.5	294.25	311.5	480	364.5
2014	S2	3147	3147	Intervention	4	NA	1	37.1	1	NA	NA	1	0	1	F	30	Negative	30/10/2012	NA	0	1	1	3220	262	8028.25	1701	4642.5	265	188.25	26186.5	709.25	16504.5	24142.5	597	287.5	464.5	750.75	363	893	478.25	399.5
2014	S2	3147	3147	Intervention	4	NA	0	36.8	0	1	NA	1	0	1	F	19	Negative	30/10/2012	NA	0	1	1	3088	519	249.5	1322.75	1172.25	3329.5	664	19571.75	660	16912	20081	291	217.75	500.5	679	300	430.75	371.75	338.25
2014	S2	3147	3147	Intervention	4	NA	1	36.4	0	1	NA	1	0	1	M	14	Negative	30/10/2012	NA	0	1	1	2903	114.75	747	164.75	775.5	130.75	116.5	130.75	256	1168	2351	95	128.5	280.5	508.25	246.5	336.75	368	288
2014	S2	3147	3147	Intervention	4	NA	0	35.8	1	NA	NA	1	0	1	F	5	Negative	30/10/2012	NA	0	1	1	3409	68	84	100.75	294.5	67	70.5	497	154.75	131.75	208.5	63	69	275.5	327.75	162	188	274.5	187.75
2014	S2	3147	3147	Intervention	4	NA	1	35.6	0	NA	NA	1	0	1	F	40	Negative	30/10/2012	NA	0	2	1	3375	359.25	178	1735.5	424.5	442.75	130	431.25	212.5	505.75	740	NA	847.75	699	786	274	206.75	252.75	279.25
2014	S2	3147	3147	Intervention	4	NA	0	36.1	1	1	NA	0	1	1	M	47	Negative	30/10/2012	NA	0	1	1	3147	565	565.5	262.25	478.25	194.75	138.25	2987	256.5	1175.75	3323.75	322.5	170.75	439	485.5	272	465.5	336.75	303.75
2014	S2	3147	3147	Intervention	4	43.1	0	35.9	1	NA	NA	0	0	1	F	45	Positive	30/10/2012	Pv	1	2	1	3131	538	234.5	318.75	1450.75	355.25	158	5063.5	303.5	3052.5	6016.25	365	269	457.25	2119.25	1060	254.75	200	197.75
2014	S2	3147	3147	Intervention	4	NA	0	35.6	1	NA	NA	0	1	1	M	7	Negative	30/10/2012	NA	0	1	1	3480	99	141	165.5	540	112.75	108	98	277.5	257.25	182	189	112.5	1194.75	1221.5	278.5	223	291.5	301.75
2014	S2	3147	3147	Intervention	4	NA	1	36.9	1	NA	NA	1	0	1	M	4	Negative	30/10/2012	NA	0	3	1	2972	48	74	84.75	106	64.25	68.5	88.5	121.75	88	162.5	49	60.5	332.5	328	121	68.5	104	100.25
2014	S2	3147	3147	Intervention	4	NA	1	36.7	1	NA	NA	0	0	1	F	5	Negative	30/10/2012	NA	0	1	1	3691	103.5	136.5	145.5	384.25	86.75	107.25	92	225.75	115	98.25	86	95.5	202.75	329	212	227.75	270	238
2014	S2	3147	3147	Intervention	4	NA	1	36.5	0	NA	NA	1	0	1	F	50	Negative	30/10/2012	NA	0	1	1	3197	1015.25	150.5	2596.75	465.5	1754.75	106.5	1595	248	777.5	1228.5	532.5	124.5	376.5	1112.25	398.75	392.75	278.25	265
2014	S2	3147	3147	Intervention	4	NA	0	36.3	0	NA	NA	1	0	1	M	4	Negative	30/10/2012	NA	0	1	1	2929	941	212	368	578.5	2363.5	347.75	3010.5	488	4149.5	NA	969	284	1033	3141.5	349.5	751.75	407.5	395.75
2014	S2	3147	3147	Intervention	NA	NA	1	36.3	0	1	NA	NA	NA	NA	M	40	Negative	30/10/2012	NA	0	2	0	3068	562.5	72	46	162.5	107	30.5	1913.5	70	561.75	918.5	304	267.25	185.5	188	42.5	60.5	40.75	37.75
2014	S2	3147	3147	Intervention	4	NA	1	35.3	0	NA	NA	1	0	1	F	20	Negative	30/10/2012	NA	0	1	1	3533	266.5	327.75	4360	2253.5	115.25	113.5	23261	381.5	2387.75	7110.5	738	188.5	707.5	613	360.25	469.5	261.75	261.5
2014	S2	3147	3147	Intervention	NA	NA	1	36.2	0	1	NA	NA	NA	NA	M	7	Negative	30/10/2012	NA	0	1	1	3295	72.75	104.5	152	337	1392.5	179.75	434	191.5	408.25	239.75	76.25	81.5	246.5	345.25	210.25	158.5	216	224.5
2014	S2	3147	3147	Intervention	4	38.9	0	35.4	0	0	NA	0	1	1	M	38	Positive	30/10/2012	Pv	1	1	0	3507	634.5	742.25	817.25	979	601.5	289.25	1948.5	320.25	1277	1522.25	276	150.75	373.75	677.75	260.5	293.75	376	307.5
2014	S2	3149	3149	Intervention	4	NA	1	37	1	1	NA	0	0	1	M	4	Negative	30/10/2012	NA	0	1	1	3575	NA	96.25	118	412.25	79	89	75.75	170	96	NA	66.25	69	245.5	337.5	184.75	235.25	415.75	250.75
2014	S2	3149	3149	Intervention	4	NA	0	37	1	1	NA	0	0	1	M	70	Positive	30/10/2012	Pv	1	2	1	3397	708.75	112.25	138.5	702	211	185	1905	310	1147.5	1931.75	683	186	683.25	987.5	247	277	245.5	250.75
2014	S2	3149	3149	Intervention	4	NA	0	36.5	1	1	NA	0	0	1	M	9	Negative	30/10/2012	NA	0	1	1	3668	39.5	57	576.75	190.25	38.5	49.5	83	87.75	56.75	58	64.5	59	186.75	215	90.75	89	108.75	106.5
2014	S2	3149	3149	Intervention	4	NA	0	36.5	1	1	NA	0	0	1	M	20	Negative	30/10/2012	NA	0	1	1	2930	340.25	140.75	163.5	405	2904.5	104.75	6120.75	300.5	4351.5	9482	742	118	548.5	604	164.25	246.5	183	189
2014	S2	3149	3149	Intervention	4	NA	0	36.5	1	1	NA	1	0	1	M	45	Negative	30/10/2012	NA	0	1	1	3166	1555.5	830	577	730	951	203.5	381	246.5	2675	3414.25	6923.5	478	4214.25	638.5	217.25	925.25	455.75	309
2014	S2	3149	3149	Intervention	4	NA	0	37.5	1	1	NA	0	0	1	F	9	Negative	30/10/2012	NA	0	1	1	2869	270	201.75	232.5	860.5	6756	582.5	222	293.25	1027.5	3933.75	104.5	113	363.25	574.5	362.25	510	493.75	362.5
2014	S2	3149	3149	Intervention	4	NA	0	37	1	1	NA	0	0	1	F	35	Negative	30/10/2012	NA	0	2	1	3039	1456.5	160	170.5	411	408	159.5	11732.25	354.5	199.5	25913.5	956.5	342.75	695.75	579.75	210.5	213.5	243.5	237
2014	S2	3149	3149	Intervention	4	NA	0	37.2	1	1	NA	0	0	1	F	10	Negative	30/10/2012	NA	0	1	1	3022	NA	NA	193.25	456.5	336	228	NA	265.25	NA	128	NA	NA	289	429.5	285.25	291.5	338	320
2014	S2	3149	3149	Intervention	4	NA	0	36	1	1	NA	1	0	1	F	35	Negative	30/10/2012	NA	0	1	1	3468	NA	105	114.25	408.25	NA	90.5	NA	178.5	582.5	NA	NA	251.75	893.5	712.25	181.5	456.5	224.25	227
2014	S2	3149	3149	Intervention	4	NA	1	37.5	1	1	NA	0	0	1	M	7	Negative	30/10/2012	NA	0	1	1	3605	61.5	75.5	102.25	232.5	54.25	59	68.75	134	750.25	185.75	54	54.5	212.75	237	131.5	167.75	151	149.5
2014	S2	3149	3149	Intervention	4	NA	0	36.6	1	1	NA	0	0	1	F	6	Negative	30/10/2012	NA	0	1	1	3493	89	112.5	138.25	355.25	94.5	113	99.25	177.75	107	NA	80	89.5	295.25	398.75	203.5	181.25	245	224.5
2014	S2	3149	3149	Intervention	4	NA	0	36.5	1	1	NA	1	0	1	F	12	Negative	30/10/2012	NA	0	1	1	3280	259	297.75	80.75	437.5	544.5	149.75	NA	126.5	1140.5	1769	272	287	1250.75	1218.75	92	227.5	107.5	198.75
2014	S2	3149	3149	Intervention	4	NA	1	37.2	1	1	NA	0	0	1	M	5	Negative	30/10/2012	NA	0	2	1	3666	54	66.25	78	192	48.5	57	68.5	116.5	59.5	154.5	58.75	57.75	189.5	250	128.25	112	136.5	129.75
2014	S2	3149	3149	Intervention	4	NA	0	37	1	1	NA	0	0	1	F	67	Negative	30/10/2012	NA	0	1	1	3049	1256.75	625.75	431.25	1876	1587	347.75	32738.5	473.25	16442.75	30512.5	858.25	1051.75	1475.75	1062	280.25	5662.5	474.5	336.25
2014	S2	3149	3149	Intervention	4	NA	0	36.5	1	1	NA	1	0	1	M	30	Negative	30/10/2012	NA	0	1	1	3294	612.75	138.75	1362.5	2404.25	908.5	104.5	17063	407.25	4917	6218	815.5	440	794	528.5	278.5	355.75	297.25	291.25
2014	S2	3149	3149	Intervention	4	NA	1	37.5	1	1	NA	0	0	1	M	16	Negative	30/10/2012	NA	0	1	1	3311	145	117.5	1176.5	NA	5371.75	726	5235.75	218.25	607.75	6643	NA	93.75	274	438	224.25	444.5	232.25	217.5
2014	S2	3149	3149	Intervention	4	NA	0	36.5	1	1	NA	0	0	1	F	8	Negative	30/10/2012	NA	0	1	1	3241	84	108	146	379.5	107.5	91	1078.75	212	153.5	430.25	81	97.5	294.5	553	200.5	178.25	227.5	234.75
2014	S2	3149	3149	Intervention	4	NA	0	37	1	1	NA	0	0	1	M	5	Negative	30/10/2012	NA	0	1	1	3546	60.75	84.25	103.25	249.25	76	73	645	172	90	184	59.5	69	175.25	270.25	151	131	149.5	155.5
2014	S2	3149	3149	Intervention	4	NA	0	37	1	1	NA	0	0	1	F	15	Negative	30/10/2012	NA	0	1	1	3038	479.5	400.5	1411.5	783	128.5	142	1864.5	596.5	12894	13240	120	338.75	808	1163	307	547.5	595.75	422.25
2014	S2	3149	3149	Intervention	4	NA	0	37	1	1	NA	0	0	1	M	7	Negative	30/10/2012	NA	0	1	1	3224	73.25	99.25	2140.25	310	162.25	97.25	80.5	160.75	128.5	160.75	62	67.5	169.5	269.75	156.5	275	207.25	196
2014	S2	3149	3149	Intervention	4	NA	0	37.5	1	1	NA	1	0	1	M	60	Negative	30/10/2012	NA	0	1	1	3235	1582.5	113.5	449.5	413.25	15009.25	205.5	546	205	2508.5	3365.5	830.5	356.75	1113	2157	168.25	1670.75	200.75	199.75
2014	S2	3149	3149	Intervention	4	NA	0	37.5	1	1	NA	1	0	1	M	5	Negative	30/10/2012	NA	0	1	1	3638	72	95.75	120.75	357.25	188	147	65.5	180.25	106.25	760	69.5	77	326.25	410.5	180.75	233.75	225	224
2014	S2	3149	3149	Intervention	4	NA	1	36.5	1	1	NA	1	0	1	M	19	Negative	30/10/2012	NA	0	1	1	3208	4758	863.5	350	512	2794	268.25	2075.25	205.5	1468.75	8155.25	255	119.5	288.75	711.5	213.75	2557	255.25	284.75
2014	S2	3149	3149	Intervention	4	NA	0	36.5	1	1	NA	1	0	1	M	11	Negative	30/10/2012	NA	0	1	1	3230	135.75	144.25	142.75	379.75	11522.25	392.5	2078.75	202.75	185	812.25	86.75	92	265	357.25	183.5	195	202	191.25
2014	S2	3149	3149	Intervention	4	NA	0	36.5	1	1	NA	1	0	1	F	5	Negative	30/10/2012	NA	0	2	1	2873	98	122.75	125.5	374.75	6869.5	641	697.75	312.5	355.75	855.75	67.25	150.5	845.5	794	205	192.5	238	223
2014	S2	3149	3149	Intervention	4	NA	0	37	1	1	NA	1	0	1	F	12	Negative	30/10/2012	NA	0	1	1	2958	240.25	382.5	211.75	3210.5	5766.25	124	1253.75	310.25	389.75	1320	128	254.75	359.25	1269.75	228.5	561.5	263.25	270.5
2014	S2	3149	3149	Intervention	4	NA	0	37	1	1	NA	0	0	1	F	10	Negative	30/10/2012	NA	0	1	1	3057	114.5	142.25	197.75	419	395	187	249	224.5	3152.75	99	87.75	91.5	195	361	226.5	175	256.75	264.25
2014	S2	3149	3149	Intervention	4	NA	1	37	1	1	NA	1	0	1	M	21	Negative	30/10/2012	NA	0	1	1	2848	608.5	142	254.5	488.25	159.5	114.5	276.5	227.25	1494.5	3111	1001.75	91	435	765.25	220.5	580.25	283	302.5
2014	S2	3149	3149	Intervention	4	NA	0	37	1	1	NA	1	0	1	M	19	Negative	30/10/2012	NA	0	1	1	2913	231	109	110	586	2473	855.5	216.25	182.5	1275.5	1576.75	71.75	1075.25	322	6928.5	869	613.5	223	211.75
2014	S2	3149	3149	Intervention	4	NA	0	36.5	1	1	NA	1	0	1	F	11	Negative	30/10/2012	NA	0	1	1	3194	77.25	111.75	2021.25	354	162.5	118	143.25	186.5	95.5	175.25	71	92.5	905.5	922.5	189	177.5	231.5	225.5
2014	S2	3149	3149	Intervention	4	NA	0	36.5	1	1	NA	1	0	1	F	70	Negative	30/10/2012	NA	0	1	1	2438	1549.5	1250.75	2145.75	1062.5	955.75	268.25	21759.5	657.25	1381.25	3280	1071.5	527.25	1795.75	1620.75	619.75	779.25	822.75	687.75
2014	S2	3150	3150	Intervention	4	NA	0	36.8	1	NA	NA	1	0	1	F	2	Negative	31/10/2012	NA	0	2	1	2823	273.75	159.5	137.25	396	1294	82.5	3012.25	196.25	3091.5	3037	90	106	202.5	373	167.5	644.75	198	193.5
2014	S2	3150	3150	Intervention	4	NA	0	36.1	1	NA	NA	1	0	1	F	8	Negative	31/10/2012	NA	0	3	0	3309	91.25	202.5	39.5	51	42	32.5	492.75	40	34.75	37.25	33.5	44	107	112.5	54.5	42.5	48.5	54
2014	S2	3150	3150	Intervention	4	NA	1	36	1	NA	NA	1	1	1	M	30	Negative	31/10/2012	NA	0	1	1	2834	1818	146	223.25	575	320.5	128.5	NA	270.5	5302.25	6659.75	591.5	335	558.5	938.75	226.5	1126.25	318.5	257
2014	S2	3150	3150	Intervention	4	NA	0	36.5	1	NA	NA	1	0	1	F	50	Negative	31/10/2012	NA	0	3	1	3238	214.5	32.5	459	338.25	171	42.5	5615.75	47	240	560.5	398.5	80.5	219.75	117.25	54	211.25	42	57.5
2014	S2	3150	3150	Intervention	4	NA	0	36.1	1	NA	NA	1	1	1	M	18	Negative	31/10/2012	NA	0	1	1	2950	277.5	128.5	153.25	732.5	184.5	108.5	1012.75	365.75	208	1516.25	203.25	173.5	262.75	395.5	237.5	287.5	302.75	261.5
2014	S2	3150	3150	Intervention	4	NA	0	36.3	1	NA	NA	1	0	1	F	5	Negative	31/10/2012	NA	0	1	1	3037	142.75	612.5	216	600	190	161.5	325	319.75	179.75	589	122	135.5	485.5	707	353	344	593.5	426.25
2014	S2	3150	3150	Intervention	4	NA	0	36.4	1	NA	NA	0	0	1	F	2	Negative	31/10/2012	NA	0	1	1	3213	1433	1333	206.25	855.75	408	126	11935	230	162.5	4179.5	1333.25	570	937.75	708.5	655.75	876.5	280.75	316
2014	S2	3150	3150	Intervention	4	NA	0	36.3	1	NA	NA	1	1	1	M	34	Negative	31/10/2012	NA	0	1	1	3280	NA	76.5	70	315.75	NA	66.75	NA	125.75	NA	NA	NA	NA	NA	553.75	115.25	NA	210.75	140
2014	S2	3150	3150	Intervention	4	NA	0	36	1	NA	NA	1	0	1	F	15	Negative	31/10/2012	NA	0	1	1	3425	83.25	92	111	293.25	220	185.5	956	163.5	108.75	233.25	82.5	79.5	160.5	253.25	172.5	146.5	224.75	193
2014	S2	3150	3150	Intervention	4	NA	0	36.2	1	NA	NA	1	0	1	M	3	Negative	31/10/2012	NA	0	1	1	2983	79	97	108.75	270.75	161.5	131.5	71.75	195.5	87.25	110.75	69	74.75	226.5	267	175.75	140.25	197.5	190
2014	S2	3150	3150	Intervention	4	NA	1	37.5	0	1	NA	1	1	1	M	36	Negative	31/10/2012	NA	0	1	1	2875	1101.5	4314.75	241.5	1621	216	100.75	2721.5	199.5	15553.75	18060.5	262	390.25	303.5	271	157	2933.25	190	194.5
2014	S2	3150	3150	Intervention	4	NA	0	36.3	1	NA	NA	1	0	1	M	7	Negative	31/10/2012	NA	0	2	1	3286	107	172	158.5	398.5	242.75	167.5	113	253.5	350	554.25	95.5	104	771.5	771.5	241.5	228	297.5	257.25
2014	S2	3150	3150	Intervention	4	NA	0	36	0	1	NA	1	0	1	F	20	Negative	31/10/2012	NA	0	1	1	2874	NA	105.5	190.5	555.5	NA	90.25	292.25	249	1365.5	1700.5	383	155.25	674	533	196	245	346	240.25
2014	S2	3150	3150	Intervention	4	NA	0	36.3	1	NA	NA	0	0	1	F	2	Negative	31/10/2012	NA	0	1	1	3198	69.5	94	104	266.5	72.5	94.75	68.25	142.5	79.25	69.5	67.75	93	173.25	242.5	148.75	135.75	229.75	181.5
2014	S2	3150	3150	Intervention	4	NA	1	37	0	1	NA	1	0	1	F	13	Negative	31/10/2012	NA	0	1	1	3077	67.5	84.5	182.5	257	194.75	172.25	524.5	171.5	76.5	162	68.5	571	295.5	400	138	111.5	154	161.75
2014	S2	3150	3150	Intervention	4	NA	0	36.3	1	NA	NA	0	0	1	F	14	Negative	31/10/2012	NA	0	1	1	2852	208	1052.25	1327.5	680.75	2480.25	1042	16344	322	9538.75	11735.5	88.75	134.75	346.75	442	222	241.75	276.25	338.75
2014	S2	3150	3150	Intervention	4	NA	1	37.3	1	NA	NA	0	0	1	F	30	Negative	31/10/2012	NA	0	1	1	2977	466	232.5	280.5	425.25	5214.5	136	1823	269.5	701.25	1371.5	1792.75	241.75	658	423	228	303.5	305	245.5
2014	S2	3150	3150	Intervention	4	43.6	0	36.5	1	NA	NA	1	0	1	F	52	Positive	31/10/2012	Pv	1	4	1	3033	690.75	53.5	180	83.25	4563.75	420.75	546.5	145.5	1602.75	2808.75	516	251.5	494.25	223	72.25	427.75	64	59.5
2014	S2	3150	3150	Intervention	4	NA	0	37.1	1	NA	NA	1	1	1	M	33	Negative	31/10/2012	NA	0	3	0	2537	552.5	1597	875	665.25	7927.5	97	25732.25	200.25	15553.5	19623.25	3044	539	1263.25	611	125.5	2058.25	84	84.75
2014	S2	3150	3150	Intervention	4	NA	0	36.4	1	NA	NA	1	0	1	F	29	Negative	31/10/2012	NA	0	1	1	3196	852.75	166	105.75	443.25	8762.25	2186.75	10518.25	207	2636.5	4442.5	1054.75	800	644	316.5	154.75	473	201.5	174.5
2014	S2	3150	3150	Intervention	4	NA	0	36	1	NA	NA	1	0	1	M	5	Negative	31/10/2012	NA	0	1	1	3249	53.5	76.5	98.25	261.75	219	87.5	78.75	182	66.5	91.5	56.25	60.25	587.25	548.5	133.5	114.25	164.5	149.5
2014	S2	3150	3150	Intervention	4	NA	0	36.3	1	NA	NA	1	0	1	M	14	Negative	31/10/2012	NA	0	1	1	3389	89	402	128.25	360.5	371.25	310.75	222.25	152.5	1372	1113.75	70.25	90.75	155	414	179	168.5	201	179.25
2014	S2	3150	3150	Intervention	4	NA	0	36.4	1	NA	NA	1	0	1	F	8	Negative	31/10/2012	NA	0	1	1	2772	175.25	5346.75	134.75	409	1213	141	27316.25	428.5	1859.5	6977.75	98.5	66	254.75	377.25	149.75	141.75	187.25	165.25
2014	S2	3150	3150	Intervention	4	NA	0	36.2	1	NA	NA	1	0	1	F	5	Negative	31/10/2012	NA	0	1	1	3142	280.75	229.5	83.5	1739.75	474.5	78.75	1888	149.5	1918.25	5102.5	53	74.25	558	594.25	181	248.5	202.5	180.75
2014	S2	3150	3150	Intervention	NA	NA	0	36	1	NA	NA	NA	NA	NA	M	3	Negative	31/10/2012	NA	0	3	1	3389	23.5	32.5	29.5	38	57.5	38	27.25	32.75	24.5	35.5	30.5	30.5	50.5	65	44.5	30.5	38	39.5
2014	S2	3150	3150	Intervention	4	NA	0	36.3	1	NA	NA	0	0	1	F	8	Negative	31/10/2012	NA	0	2	1	3410	67	153.5	97.5	264.25	64.75	75.5	154.25	149.5	68.5	267	71	86.75	456.75	504.75	145.75	120.5	165	164.5
2014	S2	3150	3150	Intervention	4	NA	0	36.1	1	NA	NA	0	0	1	M	13	Negative	31/10/2012	NA	0	1	1	2794	85	92.5	115.5	319	529.75	351.5	143.25	171.5	80.75	75.5	63	72.25	324.5	461	196.75	138	199.25	191.5
2014	S2	3150	3150	Intervention	4	NA	0	36.2	0	1	NA	0	0	1	F	12	Negative	31/10/2012	NA	0	1	1	3075	97.75	128.5	208.75	421.5	9208.25	1240.5	742	196	819.25	1646.75	72.5	81	233.5	451	392.75	243.25	222.75	177.5
2014	S2	3150	3150	Intervention	4	NA	0	36	1	NA	NA	0	0	1	M	7	Negative	31/10/2012	NA	0	1	1	3447	55	77.5	83.5	213.75	77.5	63	55	127.25	64.5	95	53	61	172	248	152.25	121	149.25	148.5
2014	S2	3150	3150	Intervention	4	NA	0	36.3	1	NA	NA	1	0	1	F	28	Negative	31/10/2012	NA	0	3	1	2693	416	687.75	169.25	216.5	111.5	35	12399.25	83.75	320	814.75	234	80.5	100	436.5	71.75	64.5	51	58
2014	S2	3150	3150	Intervention	4	NA	1	37.1	1	NA	NA	1	0	1	M	6	Negative	31/10/2012	NA	0	1	1	2881	76.25	95.75	100.75	349	300	137.5	227.5	179.5	136.75	372.5	77	80.5	404.25	420.5	175	419.75	199.5	188.75
2014	S2	3150	3150	Intervention	4	NA	0	36.3	1	0	NA	0	0	1	F	2	Negative	31/10/2012	NA	0	1	1	3272	52.5	67	71.25	204.75	62.5	59.5	46.25	108	58	48	49	50	105.75	158.5	108.5	98	146	117.5
2014	S2	3150	3150	Intervention	4	NA	0	37	0	1	NA	1	0	1	M	13	Negative	31/10/2012	NA	0	1	1	3089	352.5	125.5	146.5	573.5	324	108.5	476.5	208	724.5	876.75	114.5	92.5	280	443.75	197.5	246.25	409.5	323.75
2014	S2	3150	3150	Intervention	4	NA	0	36.5	1	1	NA	0	0	1	F	16	Negative	31/10/2012	NA	0	1	1	2452	262.25	4875.75	6613	1353.75	NA	523.5	21206.75	496.5	6026.5	10867.75	138.5	237	533.25	1837.5	424.5	2741.25	480.75	473.25
2014	S2	3150	3150	Intervention	4	NA	0	36.1	1	NA	NA	0	0	1	M	13	Negative	31/10/2012	NA	0	2	1	3266	89.5	121	159.5	363	1388.25	110.75	483	220	141.75	219	86.5	94	195.25	367.75	212.75	165.5	247.5	248.5
2014	S2	3151	3130	Control	9	NA	0	37	0	0	NA	0	0	1	F	14	Negative	1/11/2012	NA	0	1	1	3102	73	88.5	100.25	425.75	65.75	73	66.25	151.5	72.5	136.75	73	76	260.25	324.25	184.25	161.25	172.25	180.25
2014	S2	3151	3130	Control	9	NA	0	37	0	0	NA	0	0	1	F	23	Negative	1/11/2012	NA	0	1	1	2896	290.75	181	229	773	8982.5	1425	598	400.75	5163	4916.5	276.25	215	477.75	647	340.25	543	517	390.5
2014	S2	3151	3130	Control	9	NA	1	37	0	0	NA	0	0	1	F	14	Negative	1/11/2012	NA	0	1	1	3337	163.5	197	230.25	595.5	143.75	148.75	128.75	362.5	199.25	NA	130	118.5	317.75	476.25	337	327	394.25	425
2014	S2	3151	3130	Control	9	NA	0	36	0	0	NA	1	0	1	F	40	Negative	1/11/2012	NA	0	1	1	2949	453.5	424.25	1737	423	452.5	162.75	6798	274	1496.75	2397.75	718.75	179	635.25	326	180.5	932.5	166	182
2014	S2	3151	3130	Control	9	NA	0	37	0	0	NA	0	0	1	F	12	Negative	1/11/2012	NA	0	2	1	3172	58.5	85.75	101.5	353	150.5	69.25	207.5	147	70.5	236.25	57.25	63.25	277.5	231	136	119.75	163.5	147.75
2014	S2	3151	3130	Control	9	NA	0	36	0	0	NA	0	0	1	F	35	Negative	1/11/2012	NA	0	1	1	3195	231	173	367.5	659	340	143.5	1510	277	1025	957	1060	289.5	707.25	599.25	294.75	932.5	335	305.5
2014	S2	3151	3130	Control	9	NA	0	36.2	0	0	NA	0	0	1	F	4	Negative	1/11/2012	NA	0	1	1	2889	66.5	82.5	102	259.75	67.75	72.5	72	132.25	84.5	66.25	79.5	72.5	141	219.25	140.25	129.25	172.5	151.75
2014	S2	3151	3130	Control	9	NA	0	36	0	0	NA	0	0	1	M	29	Negative	1/11/2012	NA	0	1	1	2893	653.5	189.25	565	580.75	2229.5	239.5	2836.25	473	4658.5	5323.5	112.75	185	695.5	660.25	240.5	449	357.5	384
2014	S2	3151	3130	Control	9	NA	0	37	0	0	NA	1	1	1	M	22	Negative	1/11/2012	NA	0	1	1	3061	103	126.25	379.75	446	123	174	458	231.5	540.5	661	112.25	101	299.75	413.5	241.25	305	424.75	286.5
2014	S2	3151	3130	Control	9	NA	0	36	0	0	NA	0	0	1	F	31	Negative	1/11/2012	NA	0	1	1	3218	305.5	2446.5	381.75	396	1099	640.25	13862.75	381.5	3900.75	7525	135	155	902.25	1297	192.75	323	262.25	292.5
2014	S2	3151	3130	Control	9	NA	0	37	0	0	NA	1	0	1	F	13	Negative	1/11/2012	NA	0	1	1	3111	95	211	157.5	443	181.25	175.25	429	248	220.5	572	87.75	105.75	335.5	739	248.5	196.5	302.25	276
2014	S2	3151	3130	Control	9	NA	1	36	0	0	NA	0	0	1	M	19	Negative	1/11/2012	NA	0	1	1	3355	78	106.75	113.75	358.25	509	326.5	97	166.5	202.5	212.25	94.5	78.5	241	329.75	171.25	169	239	192.5
2014	S2	3151	3130	Control	9	NA	0	36	0	0	NA	0	0	1	M	8	Negative	1/11/2012	NA	0	1	1	3528	128.5	154	183.75	587.25	157.5	122.25	NA	309	319	NA	113	104.5	964.5	668.25	283.5	218.25	324.5	348.75
2014	S2	3151	3130	Control	9	NA	1	36	0	0	NA	0	0	1	M	2	Negative	1/11/2012	NA	0	1	1	3581	36	54.25	50.5	139.5	39.75	44.25	38	69	41.5	46	38.25	41	118	127.25	82	59.5	98.5	90.5
2014	S2	3151	3130	Control	9	NA	0	36	0	0	NA	0	0	1	F	3	Negative	1/11/2012	NA	0	2	1	3298	70	97	104.5	286.25	66.5	98.5	66.5	142.5	83	68	62.25	105	245.5	308.25	159.25	160.5	214	202.5
2014	S2	3151	3130	Control	9	NA	0	36	0	0	NA	1	0	1	M	13	Negative	1/11/2012	NA	0	1	1	3362	79.25	92	104	339.25	76	97.5	166	145.25	78.75	125.5	70.5	72.5	208	369	169.25	141	185.25	182.25
2014	S2	3151	3130	Control	9	NA	0	36	0	0	NA	0	0	1	F	19	Negative	1/11/2012	NA	0	1	1	3175	262.5	945.25	180	486.5	9326	461	617.75	195.25	2572.75	2950.75	109.5	87	371	451.75	194.75	294	179.5	186
2014	S2	3151	3130	Control	9	NA	1	35	0	0	NA	0	0	1	F	13	Negative	1/11/2012	NA	0	1	1	2990	94.25	129.25	336.75	425	186.5	112	1475.5	228.5	149.25	322.5	97.5	106	407	427.75	224	399.5	292	265
2014	S2	3151	3130	Control	9	NA	1	37	0	0	NA	0	0	1	F	18	Negative	1/11/2012	NA	0	1	1	3229	62.5	68.5	203.5	194	71	60.5	393.5	99.25	55	49	53.5	83	161	199.25	108.25	94.25	136.5	124
2014	S2	3151	3130	Control	9	NA	0	35	0	0	NA	0	0	1	F	2	Negative	1/11/2012	NA	0	1	1	2980	44.5	59	63	181	56.25	53	40.5	78	47.5	50	46	45	89.5	163.75	88	74	111.5	103.5
2014	S2	3152	3152	Control	4	NA	1	36.5	0	0	NA	0	0	1	M	3	Negative	30/10/2012	NA	0	1	1	3517	57.5	80.5	94	233.5	69.5	70	52	141.5	58	57.5	53.75	56	150.25	212	130.5	96.25	149.5	159
2014	S2	3152	3152	Control	4	NA	1	36.5	0	0	NA	0	0	1	F	25	Negative	30/10/2012	NA	0	2	1	3327	667.5	160.25	992.25	724.25	4283	722	14092	478	1746.25	2561	239	103.75	730.25	624	291.25	588.75	328.5	314
2014	S2	3152	3152	Control	4	NA	1	36.8	0	0	NA	1	1	1	M	50	Negative	30/10/2012	NA	0	1	1	2441	1254	145.5	255.75	1213.5	651	308.75	2412.5	249.25	1451	2188.25	1615.5	735.75	474	467.5	210	978.5	250.5	252.75
2014	S2	3152	3152	Control	4	NA	0	36.7	0	0	NA	1	1	1	M	54	Negative	30/10/2012	NA	0	1	1	3054	601	301.75	576	1797.75	683.75	655	1377.25	417.75	7396.5	8848	204.25	161	1313.75	1129.5	315	684.5	349	384.75
2014	S2	3152	3152	Control	4	NA	1	36.9	0	0	NA	1	0	1	F	32	Negative	30/10/2012	NA	0	1	1	3399	103.5	87.25	107	340	386.75	89	331.5	140.75	2186.25	1903	217	76	1108	709.5	162.5	226.75	206.5	194.75
2014	S2	3152	3152	Control	4	NA	1	36.7	0	0	NA	1	0	1	F	6	Negative	30/10/2012	NA	0	2	1	3343	100	94	240.75	684	81.25	84.75	NA	188	110	NA	270.5	146	546	423.25	273.75	169.5	200	195
2014	S2	3152	3152	Control	4	NA	1	36.7	0	0	NA	1	0	1	F	5	Negative	30/10/2012	NA	0	1	1	3760	57	63.75	69.5	181.5	63	67	52.75	89.25	374	119.25	55.5	57	105.5	169.5	99	91.75	123	119.25
2014	S2	3152	3152	Control	4	NA	1	37.1	0	0	NA	0	0	1	F	19	Negative	30/10/2012	NA	0	1	1	3190	149	490.25	441.25	390.5	5278	141.75	1831.5	349	1504.5	1819.5	97.75	103.25	262	4021.5	208	702.75	250.25	246
2014	S2	3152	3152	Control	4	NA	0	36.8	0	0	NA	1	0	1	M	5	Negative	30/10/2012	NA	0	1	1	2919	113.5	142	173.75	435	99.5	109.25	125.5	260	122.75	118	88	108	243	393.75	279.5	219.5	287.25	327.5
2014	S2	3152	3152	Control	4	NA	1	36.8	0	0	NA	1	1	1	M	23	Negative	30/10/2012	NA	0	1	1	2935	942	375.5	445.75	640.25	11347.75	406	22051.75	631.5	7074	18159.5	421.25	194.75	384.75	511	273.25	882.25	322.5	318
2014	S2	3152	3152	Control	4	NA	0	37.1	0	0	NA	0	1	1	M	30	Negative	30/10/2012	NA	0	1	1	2856	251.25	140.25	395.5	2285.5	1552	940.25	11810.75	312	3441.75	6781.25	130.75	203.75	1486.75	1365.25	272.25	436.5	268.5	274.5
2014	S2	3152	3152	Control	4	NA	1	36.9	0	0	NA	1	1	1	M	30	Negative	30/10/2012	NA	0	1	1	2907	1185.75	623	374.25	516.25	1112.5	542.25	3871.5	196.75	1289	1709.25	521.5	110.5	437.75	507.25	212.5	315.5	268	294.25
2014	S2	3152	3152	Control	4	NA	1	36.7	0	0	NA	1	1	1	F	16	Negative	30/10/2012	NA	0	1	1	3122	903.25	125	736.5	360.5	352.5	104.75	1979.75	219.25	296	2108.75	74.25	76	563.25	569.75	151.25	3014.5	190	191.25
2014	S2	3152	3152	Control	4	NA	1	36.8	0	0	NA	0	0	1	M	67	Negative	30/10/2012	NA	0	1	1	2727	970.5	217.75	277.5	679.25	482	202.25	9095.5	NA	263.75	598	694	152	631.75	963.25	291.5	452.75	349	337.75
2014	S2	3152	3152	Control	4	NA	1	37.2	0	0	NA	0	0	1	M	5	Negative	30/10/2012	NA	0	1	1	3248	91.5	113.5	182.25	392.75	93.75	120.25	100.5	189.5	109.75	NA	78.5	78.75	425	694.25	213	236.75	262.75	253.25
2014	S2	3152	3152	Control	4	NA	0	36.7	0	0	NA	0	0	1	F	60	Negative	30/10/2012	NA	0	1	1	2774	349	180	1378.5	1711	2774.5	329	3206	464.5	1066.5	3905.25	853	194.5	634.5	865.75	473.5	1563	388.5	385.25
2014	S2	3152	3152	Control	4	NA	1	36.5	0	0	NA	0	0	1	F	20	Negative	30/10/2012	NA	0	1	1	2420	787.25	1518	272.5	893	5857.25	1562.25	12726.75	415.75	3300.5	4897.25	142.75	135	298.25	447.75	272.5	2711.5	306.25	295.5
2014	S2	3152	3152	Control	4	NA	1	36.3	0	0	NA	1	0	1	F	6	Negative	30/10/2012	NA	0	1	1	3338	77.75	91.25	101	320.25	77	79.5	111.5	143.25	87	436	80.25	72.5	236.25	301.5	173.5	206.5	268	201
2014	S2	3152	3152	Control	4	NA	1	36.5	0	0	NA	1	1	1	M	32	Negative	30/10/2012	NA	0	1	1	3039	732.25	298.75	366	694.5	2831	202.5	19228.5	487.25	6007.25	6022	1077.25	304.5	880.5	1861.5	364	436.5	430.75	479.75
2014	S2	3152	3152	Control	4	NA	0	36.9	0	0	NA	1	0	1	F	8	Negative	30/10/2012	NA	0	1	1	3086	128	153	201.5	521.25	104	124.5	390.5	317	126.75	134.5	117.75	118	279.5	449.25	270.5	258	333.5	337
2014	S2	3152	3152	Control	4	NA	1	36.7	0	0	NA	1	0	1	M	52	Negative	30/10/2012	NA	0	1	1	3309	743.5	155.5	116.25	1611	1283.5	559.5	2999	207.25	1093	2505.25	302	133	253.75	256	161.75	363.25	192	299.75
2014	S2	3152	3152	Control	4	NA	1	36.8	0	0	NA	0	0	1	F	28	Negative	30/10/2012	NA	0	1	1	2868	431.75	265.5	4103.5	524.25	13990.5	792.5	8844.75	290.5	2526.75	3870.75	504.5	170.5	801	648.25	209.5	1344.5	278	260.5
2014	S2	3152	3152	Control	4	NA	1	37.1	0	0	NA	1	0	1	M	45	Negative	30/10/2012	NA	0	2	1	3946	507.75	3733	166	1119.5	783	315.75	11660.75	261.25	10980.25	13290	109	298.5	315.25	1491.5	197.25	2518.25	254.25	215
2014	S2	3152	3152	Control	4	NA	1	36.7	0	0	NA	1	0	1	M	3	Negative	30/10/2012	NA	0	1	1	3475	63	79.25	86	263.75	84.25	70.25	149	148.5	106.75	320.75	64.75	65	291.25	379.5	151.75	161.5	162.25	152
2014	S2	3152	3152	Control	4	NA	1	36.8	0	0	NA	1	1	1	M	15	Negative	30/10/2012	NA	0	1	1	2237	128.5	108.25	174	332	603.5	174.25	964	192	544.5	881.25	77	105.25	197	323.5	160	218.75	191.5	216.25
2014	S2	3152	3152	Control	4	NA	0	37.4	0	0	NA	1	1	2	M	8	Negative	30/10/2012	NA	0	1	1	3363	98.25	154	460	450	6949.25	672.5	532.25	209	386.75	467	79	164.5	248.5	402.75	234	364.5	276	248
2014	S2	3152	3152	Control	4	NA	0	37.2	0	0	NA	1	1	1	M	6	Negative	30/10/2012	NA	0	1	1	2717	357.5	3053.5	284.5	744	6624.75	4717	7288.25	254.5	10946.75	12937.5	98.75	150.5	363	957.75	193.5	345.5	239.25	249.25
2014	S2	3152	3152	Control	4	38.8	0	36.7	0	0	NA	1	1	1	M	16	Positive	30/10/2012	PfPv	2	1	1	2530	155	344.5	2245.5	476.5	185.75	165.5	2748	416.25	11224	11179	113.25	216	618.5	811.5	544.25	316.5	301.5	283.5
2014	S2	3152	3152	Control	4	NA	1	36.5	0	0	NA	1	1	1	M	43	Negative	30/10/2012	NA	0	1	1	2702	416.5	277.5	504	601.75	701.5	172.25	9476.25	298.25	561.5	1513	134	265	328.5	506	285.5	812.5	348	333.75
2014	S2	3152	3152	Control	4	NA	1	36.7	0	0	NA	1	0	1	M	10	Negative	30/10/2012	NA	0	3	1	2522	86	127	114.25	213.5	464.5	190	366.25	175	594.5	1223.5	51.75	76.25	353.25	443	132.5	176	276.75	141
2014	S2	3152	3152	Control	11	NA	0	37.1	0	0	NA	0	0	2	F	28	Negative	30/10/2012	NA	0	1	1	3081	72.75	100	129	241.75	66.5	102.5	93.25	168	84.75	132	91.25	94.5	264.75	331.25	159	142.5	180.75	197
2014	S2	3152	3152	Control	11	NA	1	36.1	0	0	NA	0	0	2	M	3	Negative	30/10/2012	NA	0	1	1	2988	95.75	123.25	145.5	501	131.5	123.5	237	193	125.25	373.5	192.75	NA	216	455.25	194	250	204.5	240.25
2014	S2	3152	3152	Control	4	NA	0	37.5	0	0	NA	1	0	1	F	15	Negative	30/10/2012	NA	0	2	1	3090	200	481	159.75	335	2278.25	138.25	443	212.75	867.5	1302.5	121.5	958.5	270.5	302	207.5	276.25	229.75	235.75
2014	S2	3152	3152	Control	4	NA	1	37.3	0	0	NA	1	0	1	F	8	Negative	30/10/2012	NA	0	1	1	3149	88.75	112.5	130	290.5	316.75	201.5	1231.5	199.25	126.5	119.5	73.25	118.5	184	305	185.75	155.5	196.75	215
2014	S2	3152	3152	Control	4	NA	1	36.8	0	0	NA	1	0	1	F	4	Negative	30/10/2012	NA	0	2	1	2816	92	129.5	124.5	450.25	793.5	101.5	288.5	168.5	98.5	242.25	73	82	182.75	255	174	156	197.5	193.5
2014	S2	3154	3154	Control	4	NA	0	37	0	0	NA	1	0	1	F	13	Negative	30/10/2012	NA	0	1	1	2879	195	109.5	125.5	351.75	748.25	572.75	243.75	190	111	232.5	76.5	88.25	323.25	341	190.5	209.25	302.75	219.5
2014	S2	3154	3154	Control	4	NA	0	36.1	0	0	NA	1	1	1	M	20	Negative	30/10/2012	NA	0	1	1	2830	387.25	144.5	168.75	725	276	104.25	375	275.25	1340	2256.5	295.5	139	412.25	1384.75	463	599.5	236.5	234
2014	S2	3154	3154	Control	4	NA	0	36.1	0	0	NA	1	1	1	F	42	Negative	30/10/2012	NA	0	1	1	3143	554	124.75	203	918.5	1355	198.75	1195.25	236.75	359	1449	714.25	676.5	630.5	884	244.25	886	361	258.75
2014	S2	3154	3154	Control	4	NA	0	36.2	0	0	NA	1	1	1	M	25	Negative	30/10/2012	NA	0	1	1	3339	234.25	169.75	191	932.5	138.5	131.25	2016.5	324.75	807.5	1328.5	391.25	461.75	377	480.5	280	321.5	302.75	309.75
2014	S2	3154	3154	Control	4	NA	0	36	0	0	NA	1	1	1	F	7	Negative	30/10/2012	NA	0	1	1	3337	119.5	123	279	335.5	NA	92	143.5	173	125	219.5	90	113.75	190.75	385.5	183.75	218.25	245	237.5
2014	S2	3154	3154	Control	4	NA	0	36.1	0	0	NA	1	1	1	M	5	Negative	30/10/2012	NA	0	1	1	3010	88.25	103	107.25	321.5	79.25	92.25	NA	152	100.75	84.5	70.5	80.25	170	283	162	176.5	198	196
2014	S2	3154	3154	Control	4	NA	0	36.3	0	0	NA	1	1	1	F	50	Negative	30/10/2012	NA	0	1	1	2821	1172.5	123.5	1642.5	702.5	553.25	292.5	4475.25	264	1228.25	1800.5	673.25	431	445.25	345	161.25	612.5	174.75	178.5
2014	S2	3154	3154	Control	4	NA	0	37	0	0	NA	1	1	1	M	18	Negative	30/10/2012	NA	0	2	1	2901	121	311	109	286.25	2254.5	97.5	3080	167.75	1360	1356	76	113.25	168.75	250	163.75	236.25	181.5	182
2014	S2	3154	3154	Control	4	NA	0	36.1	0	0	NA	1	0	1	F	12	Negative	30/10/2012	NA	0	1	1	2379	72.75	95.25	107.5	246.5	772	365.75	74.5	150.75	88	252.5	72	75.75	262.25	382.5	159.5	218.75	181.5	183
2014	S2	3154	3154	Control	4	NA	0	36.3	0	0	NA	1	0	1	F	10	Negative	30/10/2012	NA	0	1	1	2744	80.5	103	101	215.25	837	116.25	1156	175	805.5	218.25	93.5	105	170.25	309.25	140.25	160.5	175	171.75
2014	S2	3154	3154	Control	4	NA	0	36.3	0	0	NA	1	1	1	F	8	Negative	30/10/2012	NA	0	3	0	3074	36	46.25	55	62	43	61.5	40.5	55	2241.5	139.5	87	55.5	80.5	102.25	67.5	66	79	61.25
2014	S2	3154	3154	Control	4	NA	1	36.8	0	0	NA	1	0	1	M	3	Negative	30/10/2012	NA	0	1	1	3010	67.75	93.25	94.5	227.25	76	74.25	78	141.5	96.5	235.75	69	78	161	232	147.5	130.25	170.5	160
2014	S2	3154	3154	Control	4	NA	0	36.1	0	0	NA	1	1	1	M	25	Negative	30/10/2012	NA	0	1	1	2839	188	237.5	1449	1112.75	548	123.5	1107.5	299.5	1384.25	5206	118.5	113.75	919.25	676.5	256	643	357	279.75
2014	S2	3154	3154	Control	4	NA	0	36.2	0	0	NA	1	1	1	F	26	Negative	30/10/2012	NA	0	2	1	2878	109	104	4683	407.25	1067	291.25	1174.25	153	204	1765	76.25	89.5	163.5	391	146	1378.5	169	168.25
2014	S2	3154	3154	Control	4	NA	0	36.8	0	0	NA	1	1	1	M	30	Negative	30/10/2012	NA	0	3	1	2347	76.5	530.75	1218.25	68.5	3191.5	45.5	343.5	77.75	3240	7900.25	351.5	87.25	96.5	158.25	62	104.5	57	54
2014	S2	3154	3154	Control	4	NA	0	36.8	0	0	NA	1	1	1	F	32	Negative	30/10/2012	NA	0	1	1	2995	896.75	1195.75	135.5	426	182	90.25	2421.75	218.75	426	1241.75	270.5	108	270.5	353.75	191	329.75	227.5	225.25
2014	S2	3154	3154	Control	4	NA	0	36.3	0	0	NA	1	1	1	F	46	Negative	30/10/2012	NA	0	1	1	2946	1109.5	134	255	330.25	1796.5	439.25	4581.5	223.25	NA	6198.5	NA	2359	1683.5	938.5	203.75	1193.25	221	226.5
2014	S2	3154	3154	Control	4	NA	0	36.2	0	0	NA	1	1	1	M	10	Negative	30/10/2012	NA	0	2	1	2961	93.5	111.5	199	307.75	NA	133.75	NA	222.75	NA	NA	74.5	92.25	297	399.25	159.5	212.5	215	191
2014	S2	3154	3154	Control	4	NA	0	36.1	0	0	NA	1	1	1	F	10	Negative	30/10/2012	NA	0	1	1	2973	121.5	144	175.75	415.25	230	175.75	138	217.5	159.5	183.25	205	142.75	260.25	368.5	216.25	694.5	265.5	269.25
2014	S2	3154	3154	Control	4	NA	0	36.1	0	0	NA	1	1	1	M	23	Negative	30/10/2012	NA	0	3	1	2760	338	49.5	72.5	175.5	5165.75	37.5	37.5	47.25	437.75	790.5	55.5	43.5	148.75	138	79	176.5	67.75	49
2014	S2	3154	3154	Control	4	NA	0	37	0	0	NA	1	0	1	F	11	Negative	30/10/2012	NA	0	1	1	2832	93.5	106.5	616	301.5	2655	231.5	4337	197.5	289	1083	71.5	300.5	162.5	317.25	172.25	221.5	187.25	188
2014	S2	3154	3154	Control	4	NA	0	36.1	0	0	NA	1	1	1	F	40	Negative	30/10/2012	NA	0	1	1	3119	554	276.75	1023	817.5	3234.75	138.75	3345.25	412	978.5	4192	358.25	243	337	734.75	294.25	421	332	410.5
2014	S2	3154	3154	Control	4	NA	0	36.1	0	0	NA	1	1	1	F	12	Negative	30/10/2012	NA	0	3	0	2648	37	34.5	42.5	43	67.5	32.75	173.75	44.5	48.5	96	37	32.25	77.5	155.25	51.5	39.5	45.5	47.5
2014	S2	3154	3154	Control	4	NA	0	36.1	0	0	NA	1	1	1	F	8	Negative	30/10/2012	NA	0	1	1	3230	80.75	110.5	135	336.5	77.5	98.5	76.5	172.75	94.75	157.25	89.75	100.75	176.25	283.25	190.5	172.5	207	209.25
2014	S2	3154	3154	Control	4	NA	0	36	0	0	NA	1	1	1	M	40	Negative	30/10/2012	NA	0	1	1	2951	983.5	138.75	1071.5	752.5	2210	1585.75	1361.75	282.5	1571.75	1317.5	588.75	301.75	515	657	235.25	264.5	259.25	249
2014	S2	3154	3154	Control	4	NA	0	37	0	0	NA	1	0	1	F	14	Negative	30/10/2012	NA	0	1	1	3182	161.75	137	620.75	430.5	10568	2304	665.25	204.5	334	908.5	90.75	104.25	236	420	245.75	228	246.25	249.5
2014	S2	3154	3154	Control	4	NA	0	35.6	0	0	NA	1	1	1	M	12	Negative	30/10/2012	NA	0	1	1	3047	86.25	119.5	138	353	80.5	95.5	194.5	205.5	99.5	107	75.5	99.5	323	413.5	218.75	167.5	215	239.5
2014	S2	3154	3154	Control	4	NA	0	36.2	0	0	NA	1	1	1	M	6	Negative	30/10/2012	NA	0	2	1	3066	1631	134	163.5	256.25	76.5	99.75	92.5	150.75	113.25	571.75	68.5	129.25	268	526.5	157.5	1045.25	168.75	185
2014	S2	3154	3154	Control	4	NA	0	36.3	0	0	NA	1	1	1	M	12	Negative	30/10/2012	NA	0	1	1	2990	107	122.5	133.5	305.75	128.5	103.25	96	186.25	106.75	92	82.25	87.5	190.5	335	177	181.5	231	229.25
2014	S2	3154	3154	Control	4	NA	0	36	0	0	NA	1	1	1	M	25	Negative	30/10/2012	NA	0	1	1	2846	316.75	208	406.75	623.75	881	110	9112	258	2127	5382.25	88	149.25	334.5	2306.25	218.5	504.5	264	258.5
2014	S2	3154	3154	Control	4	NA	0	36.1	0	0	NA	1	1	1	M	35	Negative	30/10/2012	NA	0	3	1	2847	114.5	145	1399.5	70.25	718.5	99.5	6379.5	52.5	531.5	1243.5	91.5	50.75	196.25	141.25	51.5	382	41	45
2014	S2	3154	3154	Control	4	NA	0	36.9	0	0	NA	1	1	1	M	8	Negative	30/10/2012	NA	0	1	1	3345	90	122.5	129	306.75	106.5	163.25	143	221.25	104	113.75	80	87.5	198.5	358.25	184.25	178	238.25	218
2014	S2	3154	3154	Control	4	NA	0	36	0	0	NA	1	1	1	M	29	Negative	30/10/2012	NA	0	2	1	3096	349.5	151.5	174	1074	1585	156	2999	247	3566	7472.75	97.75	175.25	304.5	418.5	212	980	309	233.25
2014	S2	3154	3154	Control	4	NA	0	36.1	0	0	NA	0	1	1	M	20	Negative	30/10/2012	NA	0	1	1	3500	109	108	122.5	291	96.75	98.25	85.75	164.25	2132.5	92	115.75	100	321.75	733.75	204.5	156.25	193	198
2014	S2	3154	3154	Control	4	NA	0	36.3	0	0	NA	1	1	1	F	30	Negative	30/10/2012	NA	0	1	1	2668	773.5	3746	412	1840.5	870	97.5	11494	305.25	4812.25	9768.75	186.5	175	754.75	2949.75	254	683	228.75	223.5
2014	S2	3154	3154	Control	4	NA	0	36.5	0	0	NA	1	1	1	M	30	Negative	30/10/2012	NA	0	3	1	2338	119	165.75	295.25	199	573.25	68.5	7201.5	94.25	184.5	2894	213	63.25	228	312	81.75	221.25	89.75	75.5
2014	S2	3154	3154	Control	4	NA	0	36.1	0	0	NA	1	1	1	F	9	Negative	30/10/2012	NA	0	1	1	3231	77.25	93.25	146	272.75	429.5	72	66.5	157.25	127.5	245	67	88	191	282.5	147.5	164.25	185.75	183
2014	S2	3154	3154	Control	4	NA	0	36.3	0	0	NA	1	1	1	F	21	Negative	30/10/2012	NA	0	3	0	2201	37	48.25	51	293	2160.75	49.5	562	89.75	796.5	997	48.5	49.75	141.75	169.25	66.5	57	61	60.25
2014	S2	3154	3154	Control	4	NA	0	36	0	0	NA	1	1	1	M	58	Negative	30/10/2012	NA	0	1	1	3170	619	262.5	130	460.25	2182	419	1697.5	267.5	1509	781.75	429	198	621.75	362.5	198.25	534.5	215.25	203
2014	S2	3154	3154	Control	4	NA	0	36.4	0	0	NA	1	0	1	F	13	Negative	30/10/2012	NA	0	2	1	2636	467	147	4990	561.25	15817.75	2527.5	1526.5	270	1179.5	2241	187.5	123	300	457	213.5	198	264.5	256.75
2014	S2	3154	3154	Control	4	NA	0	36.3	0	0	NA	1	1	1	F	6	Negative	30/10/2012	NA	0	1	1	2847	72.5	87.5	108.5	271.75	84.75	82.75	92	187.25	96.5	112.25	67.75	71.75	172	304.5	154.25	150.25	189.5	179.5
2014	S2	3154	3154	Control	4	NA	0	36.3	0	0	NA	1	1	1	M	19	Negative	30/10/2012	NA	0	1	1	2526	1883	1665	2988.25	1255.25	8308.75	770	18331.5	387.75	9710	16718.5	587.5	1032	625	2975.25	538.5	593	276	615
2014	S2	3172	3172	Control	3	NA	0	37	0	0	NA	0	0	1	M	33	Negative	5/11/2012	NA	0	1	1	3522	353.5	114	2812.5	159.5	1612	44	799	77	726.5	972.5	2454.25	548	954.75	179.5	78.5	135.5	87.5	81.75
2014	S2	3172	3172	Control	3	NA	0	37	0	0	NA	0	0	1	F	22	Negative	5/11/2012	NA	0	2	1	3413	262.25	92	111	297.75	275.75	93.75	3527	139	546.5	798.5	499.5	109.5	318.25	268.5	127.5	251	149.5	158
2014	S2	3172	3172	Control	3	NA	0	37	0	0	NA	1	0	1	M	48	Negative	5/11/2012	NA	0	2	1	3087	852.25	113.75	301.25	637.75	1175	552.75	9087.5	188	933.25	1933.5	1336	820.75	1076.5	299.5	171	270.25	204.25	246
2014	S2	3172	3172	Control	3	NA	0	36.5	0	0	NA	0	0	1	F	45	Negative	5/11/2012	NA	0	1	1	3211	371	314	108	305.5	710.5	276.5	1697.25	232	1181	1117.75	497	708.75	250	270	153.25	426.75	170.5	190.5
2014	S2	3172	3172	Control	3	NA	0	37	0	0	NA	0	0	1	F	16	Negative	5/11/2012	NA	0	1	1	2963	67.75	100	97.5	294.25	2350.5	94.75	1303	215	102.25	208	64.75	82	181.75	260.5	139.5	156.75	157.75	182
2014	S2	3172	3172	Control	3	NA	0	37	0	0	NA	0	0	1	F	7	Negative	5/11/2012	NA	0	1	1	2842	70.75	90	114	295	273	119.5	75.75	208	99	200	66	80.75	236	327.5	160.5	198.5	324	212.5
2014	S2	3172	3172	Control	3	NA	0	37	0	0	NA	0	0	1	M	22	Negative	5/11/2012	NA	0	1	1	3078	122	232.5	458.5	461.5	5174.25	1182.5	3097.5	131.5	7327.25	8488.75	249.5	57	336.25	368	100.25	358.5	107	108.5
2014	S2	3172	3172	Control	3	NA	0	37	0	0	NA	1	0	1	M	18	Negative	5/11/2012	NA	0	1	1	3055	69.5	69.5	84.5	300.5	107.25	55	195.5	96.25	102.5	296	80.5	52	164	2624.5	964.75	362.5	108.75	113.5
2014	S2	3172	3172	Control	3	NA	0	37	0	0	NA	0	0	1	F	15	Negative	5/11/2012	NA	0	1	1	3244	59	67.5	147	332.75	81.5	59	148.25	97.25	127.5	168.5	66.5	68	105.5	175	97	123	107.75	108
2014	S2	3172	3172	Control	3	NA	0	36.5	0	0	NA	0	0	1	M	2	Negative	5/11/2012	NA	0	1	1	2000	47	60.5	68.75	186.5	49	57.5	45.25	88.75	50.25	58	47.25	132	106	173.25	105.5	94.25	111.75	111
2014	S2	3172	3172	Control	3	NA	0	36.5	0	0	NA	0	0	1	M	21	Negative	5/11/2012	NA	0	1	1	2955	338.25	118.5	243.25	292.75	260.5	92.75	2405	245.5	966.25	1135	600.5	190.5	338	606.5	168	431	191.75	200.5
2014	S2	3172	3172	Control	3	NA	0	37	0	0	NA	0	0	1	F	22	Negative	5/11/2012	NA	0	1	1	2979	72.25	139.5	85.25	200.25	419.5	61.5	603.25	127	192	305	110.25	75	257.5	301	144.5	158.5	138.5	132.5
2014	S2	3172	3172	Control	3	NA	0	36.5	0	0	NA	1	0	1	F	2	Negative	5/11/2012	NA	0	1	1	3459	58.5	73.75	80	223	53.5	60.5	60.75	118.5	61	79.75	54	60	132.75	219	119.75	113.5	150.75	144.5
2014	S2	3172	3172	Control	3	NA	0	36.5	0	0	NA	0	0	1	M	4	Negative	5/11/2012	NA	0	1	1	3174	63.75	87	94.25	281.75	104.75	95.75	70	139	83.75	70.75	63	82.5	154.5	300.5	149.75	216	291.5	205.25
2014	S2	3172	3172	Control	3	NA	0	36.5	0	0	NA	0	0	1	M	62	Negative	5/11/2012	NA	0	1	1	3127	203	144.5	1032.25	631.75	1128.5	99.5	5629	196.25	258.5	1988.5	426	94.5	254.75	572	276.5	3680	231.5	207
2014	S2	3172	3172	Control	3	NA	0	36.5	0	0	NA	0	0	1	F	58	Negative	5/11/2012	NA	0	1	1	2924	570.25	84.75	143.5	217	190.75	120.75	388.25	182	73	202.75	1287	513.5	796.5	289.5	162.5	142.5	154.75	141.25
2014	S2	3172	3172	Control	3	NA	0	37	0	0	NA	0	0	1	M	12	Negative	5/11/2012	NA	0	1	1	3150	88	117.75	102.25	320.5	137.25	84.25	210.75	148	114	251.5	317.75	87.5	397.75	328	150.25	193.75	215	185
2014	S2	3172	3172	Control	3	NA	0	37	0	0	NA	1	0	1	M	62	Negative	5/11/2012	NA	0	1	1	3277	800.5	891.5	602.5	479	471.75	107.5	1298.25	368.75	172.5	772.5	1107	142.25	588.5	510.5	3143.5	311.5	301.75	298.75
2014	S2	3172	3172	Control	3	NA	0	37	0	0	NA	1	0	1	F	20	Negative	5/11/2012	NA	0	2	1	3068	846	119.5	871.25	618.5	3880.5	912.5	732	315.5	744.75	1198	112.5	104.75	258.5	357	187.5	479.25	228	221
2014	S2	3172	3172	Control	3	NA	0	36.5	0	0	NA	0	0	1	F	3	Negative	5/11/2012	NA	0	1	1	2310	66.5	78.75	99.25	317.5	123.75	80	93	134.75	74.5	253.5	64.75	90	529.5	576	140.75	173	292	218.75
2014	S2	3172	3172	Control	3	NA	0	36.5	0	0	NA	1	0	1	M	9	Negative	5/11/2012	NA	0	1	1	2818	95.5	115.5	118.25	323	87	118	101	170.5	115.25	211.75	87	90	475.5	597.75	189.25	212	279.5	259
2014	S2	3172	3172	Control	1	NA	0	37	0	0	NA	1	0	1	M	22	Negative	5/11/2012	NA	0	1	1	3065	39.5	50.5	52.25	141.5	180.75	62.5	2503.75	118.75	50	78.5	40.5	40.25	323.5	435.5	81	62.25	89.5	87.75
2014	S2	3172	3172	Control	1	NA	0	36.5	0	0	NA	0	0	1	F	12	Negative	5/11/2012	NA	0	1	1	3108	61.5	82.5	83.5	278.25	57.5	74	64	122	69	66.5	79	62.25	346.5	429	127.5	137.25	158	152.5
2014	S2	3172	3172	Control	3	NA	0	37	0	0	NA	0	0	1	F	18	Negative	5/11/2012	NA	0	1	1	3158	277.5	217.5	445	500.5	160.25	114.75	3060.25	285.25	1321.75	1928.25	154.75	120.75	659	723.75	212	1957.25	424	287
2014	S2	3172	3172	Control	3	NA	0	37	0	0	NA	1	0	1	M	24	Negative	5/11/2012	NA	0	1	1	2721	220	92.5	447.5	470.5	286	81.25	191	117.5	438	643	85.75	62.5	231	247.5	114	415.5	140.5	130.5
2014	S2	3172	3172	Control	1	NA	0	36.5	0	0	NA	0	0	1	F	6	Negative	5/11/2012	NA	0	1	1	3069	49.75	61	74.5	198.25	765.5	483.75	62.5	100.25	56.75	67.25	47.25	50.25	128.5	197.75	108.5	114	135	121
2014	S2	3172	3172	Control	1	NA	0	37	0	0	NA	0	0	1	M	28	Negative	5/11/2012	NA	0	1	1	3040	50.5	77.5	79.5	202.5	123.5	61.75	77	106.25	73	82.75	69.5	64	248.25	251	110	132	132.5	134.5
2014	S2	3172	3172	Control	1	NA	0	37	0	0	NA	0	0	1	F	20	Negative	5/11/2012	NA	0	1	1	3195	47.5	47	50.5	110.25	37	43.75	58.5	65.25	193.5	49	44.5	39	140	155.5	81.75	75	84.5	82.25
2014	S2	3172	3172	Control	3	NA	0	36.5	0	0	NA	0	0	1	M	6	Negative	5/11/2012	NA	0	1	1	3241	40	58	57.5	148.25	55.25	47.25	48	82.5	45.5	88.5	46.5	57.5	131	669.25	99	82	104	106.25
2014	S2	3172	3172	Control	1	NA	0	37	0	0	NA	0	0	3	F	45	Negative	5/11/2012	NA	0	1	1	3197	80.75	110.5	104.5	297.5	144	102.75	76.25	145.5	92	79.5	131.5	86.25	287.5	316.25	159.5	184	260	208.25
2014	S2	3172	3172	Control	1	NA	0	37	0	0	NA	0	0	1	F	22	Negative	5/11/2012	NA	0	1	1	3485	74.5	103.5	121.75	294.75	74	93	452.5	145	98.5	92.5	76.5	80.5	462	415.5	157.5	166.75	195	197.75
2014	S2	3172	3172	Control	3	NA	0	37	0	0	NA	0	0	1	M	45	Negative	5/11/2012	NA	0	1	1	3180	376	212.5	120.5	398.5	1400	92	2848.75	137.5	2394.5	3501	502.75	136.5	438.25	290.75	136	292.5	188.5	177.25
2014	S2	3172	3172	Control	3	NA	0	37	0	0	NA	0	0	1	F	16	Negative	5/11/2012	NA	0	3	1	2517	54	42	165.5	53.25	112	44	204.25	46.5	33.5	223.75	48.75	50	163	102.5	54	278.5	53.5	57
2014	S2	3172	3172	Control	3	NA	0	37	0	0	NA	0	1	1	F	70	Negative	5/11/2012	NA	0	1	1	2942	2329	530.25	297.25	662.75	699.25	153.75	26228.5	642	1875.25	2111.25	974	504.25	828.75	3106.75	673.5	1468	489.75	393
2014	S2	3172	3172	Control	3	NA	0	36.5	0	0	NA	0	0	1	F	7	Negative	5/11/2012	NA	0	1	1	3198	94.5	75.5	74	200	71	58.5	1370.25	130.75	93	312	63	81	171.75	285.25	121.75	204.75	135	141.75
2014	S2	3172	3172	Control	3	NA	0	36.5	0	0	NA	0	0	1	M	10	Negative	5/11/2012	NA	0	1	1	3527	54	69.5	74.5	217.5	398	265.5	65.75	123.75	47	130	49	65	202.5	211	118.75	124.5	141	143.25
2014	S2	3172	3172	Control	3	NA	0	37	0	0	NA	1	0	1	F	35	Negative	5/11/2012	NA	0	2	1	3170	450.5	235.75	333	404.75	1875	363	8828	322	2512	4982.75	96.5	269	287.25	311	232	771	166.5	177.5
2014	S2	3172	3172	Control	3	NA	0	37	0	0	NA	0	0	1	M	18	Negative	5/11/2012	NA	0	2	1	2920	139.5	224.25	2321	480	1571.5	849	5155	239.25	1134.25	1709	NA	88	243.75	491	236	227	268.25	278
2014	S2	3172	3172	Control	3	NA	0	37	0	0	NA	1	0	1	M	12	Negative	5/11/2012	NA	0	1	1	3088	29.5	42.25	46.5	78.75	85.75	97	275	69.5	34	113	37.5	57.5	386	358	63	51.5	68	64
2014	S2	3172	3172	Control	3	NA	0	36.5	0	0	NA	0	0	1	M	2	Negative	5/11/2012	NA	0	1	1	2967	45.5	58.5	63	143.25	45.25	50	50.5	82	48.5	41.25	44	50.5	95.25	143.5	92	79.75	110.5	100.75
2014	S2	3172	3172	Control	3	NA	0	37	0	0	NA	0	0	1	F	12	Negative	5/11/2012	NA	0	1	1	2944	54.5	75.5	81	198.5	64.75	79	70	130.5	65.25	102	50	59	113	212.75	129	97.5	143.5	132.5
2014	S2	3172	3172	Control	3	NA	0	37	0	0	NA	0	0	1	M	22	Negative	5/11/2012	NA	0	1	1	2723	105	91.5	298.25	1367.5	86.5	86.5	1099	125.75	913	1372	341	73	170	307.5	131.25	168.5	152.5	143
2014	S2	3172	3172	Control	3	NA	0	37	0	0	NA	0	0	1	M	74	Negative	5/11/2012	NA	0	1	1	2589	544.5	132.25	176	326.75	NA	100.5	NA	223.75	NA	NA	175	110	464.5	430.25	187.25	780	253	203.75
2014	S2	3172	3172	Control	3	NA	0	37	0	0	NA	0	0	1	F	22	Negative	5/11/2012	NA	0	1	1	2670	405	163	1596	417.5	559	136.75	22816.5	252.25	434.5	668.25	133	121	287	384.25	248.5	365.25	337.75	310.5
2014	S2	3172	3172	Control	3	NA	0	37	0	0	NA	0	0	1	M	24	Negative	5/11/2012	NA	0	1	1	2619	186.5	205.5	234.25	451.5	594.5	124	2174.5	287.25	116.25	151	166.25	98.75	318.75	704	265.75	1162	267.5	311
2014	S2	3174	3174	Control	3	NA	0	36	0	0	NA	0	0	1	M	16	Negative	5/11/2012	NA	0	1	1	2730	400.5	250.75	4290	578.75	199	144.5	2911.5	344.25	247	1005	140.75	146	405	563.75	312.75	1337	345.5	352.25
2014	S2	3174	3174	Control	3	NA	0	35.9	0	0	NA	0	0	1	F	8	Negative	5/11/2012	NA	0	1	1	2642	65.75	81.5	101.75	240	59.25	73	72.5	129.75	6252	69	61.75	65.25	199.25	273.5	139.25	134.5	198.25	157
2014	S2	3174	3174	Control	3	NA	0	37	0	0	NA	1	1	1	M	65	Negative	5/11/2012	NA	0	1	1	2966	1181.5	100	120.5	532.5	874.75	123.75	1995	162.5	2005	5437.5	330.5	167	335.25	473.75	181.25	474	202.25	152.25
2014	S2	3174	3174	Control	3	NA	1	36.3	0	0	NA	1	0	1	F	55	Negative	5/11/2012	NA	0	1	1	2814	1151	91.5	1626.75	621	328.75	230.5	5512	140	2444.5	2433.5	668.5	497.75	417	325.75	155	2865.5	171	159.5
2014	S2	3174	3174	Control	3	NA	1	37	0	0	NA	0	0	1	M	18	Negative	5/11/2012	NA	0	3	1	2779	1521	50	131	75.5	326	49.5	799	69.75	308.25	757.75	47	53.75	326	333.5	71	165.25	150	76.25
2014	S2	3174	3174	Control	3	NA	0	37	0	0	NA	1	0	1	F	28	Negative	5/11/2012	NA	0	1	1	2695	213	177.5	170.25	260.5	1339.5	76.5	216.75	140.25	388.25	827	360.25	240	402.75	358.75	140.25	336.75	158.75	145.75
2014	S2	3174	3174	Control	3	NA	0	36	0	0	NA	1	0	1	F	19	Negative	5/11/2012	NA	0	1	1	2560	454	130.5	138.25	908.5	373.5	157.5	662	263.75	1100	2561.25	94.75	95.5	247.75	379.25	198.25	294.5	235.75	226
2014	S2	3174	3174	Control	3	NA	0	36	0	0	NA	0	0	1	M	17	Negative	5/11/2012	NA	0	1	1	2620	125.5	88	1603	572.75	1482.75	81.25	551	160.25	287.5	462.75	74.5	72.5	194	332	159	242.25	203.5	197
2014	S2	3174	3174	Control	3	NA	0	36	0	0	NA	0	0	1	M	12	Negative	5/11/2012	NA	0	1	1	2703	51	68	77.25	182.75	50	65	NA	114	60.25	59	85.5	56.5	237.5	231.75	118	90.5	128.25	122
2014	S2	3174	3174	Control	3	NA	0	37	0	0	NA	1	0	1	F	33	Negative	5/11/2012	NA	0	1	1	2608	433.25	85	106	257.25	NA	NA	1536.5	156	1028.25	NA	100.5	98.5	579.5	479.5	146.75	163.75	184.5	158.5
2014	S2	3174	3174	Control	3	NA	0	37	0	0	NA	0	0	1	F	10	Negative	5/11/2012	NA	0	4	0	3448	29.5	39.25	39.5	77.75	36.5	43	33.5	46.5	2454	80.25	39.75	44.5	699	609	57	48	70.25	110.5
2014	S2	3174	3174	Control	3	NA	0	36.4	0	0	NA	0	0	1	F	7	Negative	5/11/2012	NA	0	1	1	3134	71.5	99.5	107.25	315.25	61.5	73.75	66.5	170	87.75	75.75	64	67	207	320.75	171	181.75	277.75	234.5
2014	S2	3174	3174	Control	3	NA	0	36	0	0	NA	0	0	1	M	5	Negative	5/11/2012	NA	0	1	1	2616	69.75	96	102.5	336.5	77.25	76.25	75	167	83	77.5	69.75	71.5	232.75	326.5	168.75	206.25	297	192
2014	S2	3174	3174	Control	3	NA	0	37	0	0	NA	0	0	1	F	6	Negative	5/11/2012	NA	0	1	1	2818	68	74	89	249	51.25	63.5	60	129	741.75	89.75	59	56.75	409.25	429.75	131	143	178.75	148
2014	S2	3174	3174	Control	3	NA	1	36.5	0	0	NA	1	0	1	M	32	Negative	5/11/2012	NA	0	1	1	2451	561.25	93.75	209.25	464	418	103	5733	204.5	599.5	2131	248	99.5	385.5	1597	209	163.75	170	181.75
2014	S2	3174	3174	Control	3	NA	1	37	0	0	NA	1	0	1	M	12	Negative	5/11/2012	NA	0	1	1	2549	71	92.25	107.25	301.5	96.5	91	1364.5	145.5	90.75	165.75	121	83.25	265.5	300	189.5	156.5	195.75	170.75
2014	S2	3174	3174	Control	3	NA	0	36	0	0	NA	1	1	1	M	34	Negative	5/11/2012	NA	0	2	1	2497	915	100	139	396.5	293	113.5	4503.75	219.5	4053.5	4091	198.75	201.75	570.5	379	182	235.75	219.75	205.75
2014	S2	3174	3174	Control	3	NA	0	37	0	0	NA	0	0	1	M	11	Negative	5/11/2012	NA	0	1	1	2811	60	68	77	203.5	65.5	55	89	108.75	160.5	81.25	51.5	58.5	218	219.75	127	96.75	148.5	133.25
2014	S2	3174	3174	Control	3	NA	0	36.2	0	0	NA	0	0	1	M	4	Negative	5/11/2012	NA	0	3	1	2514	29	34	31.5	42	27.25	33	27.25	39	29.75	31.5	30.5	30.5	49.5	77.5	45.5	39.75	49	43.75
2014	S2	3174	3174	Control	3	NA	0	36.5	0	0	NA	0	0	1	M	20	Negative	5/11/2012	NA	0	1	1	2541	122.5	143.25	192.5	600.5	1125	125.25	244.5	264	660.5	1419.5	94.25	137.75	371.75	476	253.5	428.5	400.5	327.75
2014	S2	3174	3174	Control	3	NA	0	36.3	0	0	NA	1	0	1	M	7	Negative	5/11/2012	NA	0	1	1	2611	59	80	90.75	287	58.5	65.25	130.25	132.25	82.75	107.75	57.5	60.75	593.25	614.25	139	136.75	171	140.75
2014	S2	3174	3174	Control	3	NA	1	37	0	0	NA	0	0	1	M	42	Negative	5/11/2012	NA	0	1	1	2711	308	111.25	841.75	486	228.5	95	15976.75	200	8289.25	8159.75	728.5	177	553	730.5	469.25	227	318.5	246.75
2014	S2	3174	3174	Control	3	NA	0	36	0	0	NA	0	0	1	M	18	Negative	5/11/2012	NA	0	1	1	2569	69	77.75	109	549	1817	86.5	460.5	147	343	595.75	58	59.5	192	326.5	157.25	188.25	207.75	169.5
2014	S2	3174	3174	Control	3	NA	0	36.1	0	0	NA	0	0	1	F	15	Negative	5/11/2012	NA	0	1	1	2593	418	119.25	172.75	503	5412.75	2824.5	1666.75	330	845.75	1233.5	284.5	87.5	258	386.25	222	249	266.75	240.5
2014	S2	3174	3174	Control	3	NA	0	36	0	0	NA	1	0	1	F	34	Negative	5/11/2012	NA	0	1	1	2696	586	82.5	107.75	247.25	647.75	72.5	2357	167	2143	2332	512	314.75	2481	1881	323	181.25	156.25	165.5
2014	S2	3174	3174	Control	3	NA	1	37	0	0	NA	1	0	1	M	18	Negative	5/11/2012	NA	0	1	1	2110	321.5	192.75	355.5	2200.25	1831.75	247.75	19042	711.25	NA	19583	153	142	361	720	253.5	349.75	279.5	287.25
2014	S2	3174	3174	Control	3	NA	0	35.9	0	0	NA	1	0	1	F	35	Negative	5/11/2012	NA	0	1	1	2814	2206.25	670.75	146.5	447.5	803.5	88.75	6079.5	216.75	2178.75	2380	2469	438.5	2160	703.5	197.25	834.75	234.25	183.75
2014	S2	3174	3174	Control	3	NA	0	36.2	0	0	NA	1	1	1	M	31	Negative	5/11/2012	NA	0	1	1	2889	644.5	87.5	151.5	1914.5	1028.25	72.75	5858.25	249.5	1961	4915	304.5	292.75	337.5	576	189	5061	160	179
2014	S2	3174	3174	Control	3	NA	0	35.6	0	0	NA	1	0	1	F	19	Negative	5/11/2012	NA	0	3	1	2341	551	47	160.25	88.75	2402.25	56	2258	115.5	333.25	720	148.5	129	159	168.5	68	534.5	78.25	61.75
2014	S2	3174	3174	Control	3	NA	1	37	0	0	NA	0	0	1	F	12	Negative	5/11/2012	NA	0	1	1	2666	145.75	83.5	104.5	239	558	84	245.75	218	202.75	525.75	78	76.5	276.5	407	153	187.5	186	175
2014	S2	3174	3174	Control	3	NA	0	36	0	0	NA	0	0	1	M	5	Negative	5/11/2012	NA	0	2	1	2730	41	57.5	58.5	167.25	49	45.25	54	83	45.75	126.75	44.5	43.5	90.25	137.25	88	90.5	105.5	106.75
2014	S2	3174	3174	Control	3	NA	0	36	0	0	NA	0	0	1	M	4	Negative	5/11/2012	NA	0	3	1	2825	30	39	41	50.5	32	78	33	52.25	30.5	45	36.25	35.75	486	384.5	66.5	46	56.25	74.25
2014	S2	3174	3174	Control	3	NA	1	36	0	0	NA	0	0	1	F	7	Negative	5/11/2012	NA	0	1	1	2633	48	63.5	75	183.5	49.5	74.25	47	111	56.5	118	57.25	65.5	315.5	329.5	124.5	127.25	124	120.5
2014	S2	3174	3174	Control	3	NA	1	36	0	0	NA	1	0	1	M	38	Negative	5/11/2012	NA	0	3	1	3097	674.5	78.75	61.5	401	2798	148.5	2384.5	295.25	5436.5	5502.25	594.25	156	262	171.25	83.25	173	71.75	71.5
2014	S2	3174	3174	Control	3	NA	0	35.9	0	0	NA	0	0	1	M	10	Negative	5/11/2012	NA	0	1	1	2402	114.5	115.75	110.5	304.25	15350	302.75	6299.75	201.75	3416.5	5905.75	58.5	76.25	624.75	595.5	142.5	138.5	197	168.5
2014	S2	3174	3174	Control	1	NA	1	37	0	0	NA	0	0	1	M	13	Negative	5/11/2012	NA	0	1	1	2683	58	74.25	93	261.25	158.5	61	84	134	71	112	59	61	221.5	252	143	136	165.25	144
2014	S2	3174	3174	Control	3	NA	0	36	0	0	NA	0	0	1	F	10	Negative	5/11/2012	NA	0	2	1	2801	43	61.75	61.75	166.25	299.75	90.25	5503.75	89.5	129.5	178	49	52.5	230.75	278	88.75	81.75	107.25	104
2014	S2	3174	3174	Control	1	NA	0	37	0	0	NA	0	0	1	M	23	Negative	5/11/2012	NA	0	1	1	2653	66.75	86	94.75	335.75	1219.25	80.5	1210.5	170	259.5	525	58	65	202.5	253	162	188.25	179	152.5
2014	S2	3174	3174	Control	3	NA	0	36	0	0	NA	0	0	1	F	18	Negative	5/11/2012	NA	0	1	1	2812	193	95.5	159	251.5	741.5	89.5	462	148	129.75	590.75	67	80.75	171.5	462.5	150.5	229.5	189.5	189.25
2014	S2	3175	3175	Control	4	NA	0	35.7	0	0	NA	0	0	1	F	35	Negative	4/11/2012	NA	0	1	1	2873	628	120	835.5	360	73.25	91.5	878	204.5	582.75	1181.25	145.5	84	302.5	335.25	194	450	273.75	231
2014	S2	3175	3175	Control	4	NA	0	36.8	0	0	NA	0	0	1	M	30	Negative	4/11/2012	NA	0	1	1	2474	1327.75	219.75	704.25	476.25	7866.25	114.25	1063	293	1336.5	2423	400.75	509.25	486.75	534.75	229.5	927.25	258	257
2014	S2	3175	3175	Control	4	NA	1	36.3	0	0	NA	0	0	1	F	25	Negative	4/11/2012	NA	0	1	1	2625	696.75	121.5	130	861.75	NA	92	NA	232.25	NA	NA	NA	352	767.25	284.25	184	186.75	222.75	200
2014	S2	3175	3175	Control	4	NA	0	36.9	0	0	NA	0	0	1	M	13	Negative	4/11/2012	NA	0	1	1	2691	61	77.5	86.75	226.25	90.75	77	71	137	63	930	61.25	66.25	300.5	355	168.75	106.5	154.5	150.75
2014	S2	3175	3175	Control	4	NA	0	36.8	0	0	NA	0	0	1	F	16	Negative	4/11/2012	NA	0	1	1	2641	100	70.25	114	217	2030.5	107.25	312.25	109	86.5	327.75	50.5	56.5	157.5	183.25	114.5	108.25	130.5	138.5
2014	S2	3175	3175	Control	4	NA	0	36	0	0	NA	1	0	1	M	8	Negative	4/11/2012	NA	0	1	1	2836	53.5	80	88.75	250.25	72.5	71	58.5	126.25	62.5	104	61.5	76.5	173.25	262.75	140	143.75	179.5	163.75
2014	S2	3175	3175	Control	4	NA	1	36.8	0	0	NA	1	0	1	M	30	Negative	4/11/2012	NA	0	1	1	2571	565	206.25	165.5	609.5	881.5	137	8996.75	296.25	891.75	1353.25	793.75	223.25	522.5	467	245	317	328	292.5
2014	S2	3175	3175	Control	4	NA	1	36.6	0	0	NA	1	1	1	M	39	Negative	4/11/2012	NA	0	1	1	2733	469.25	63	470.75	178	295.25	55.5	249.75	116.25	397.25	898.5	134.5	80.5	260.75	303	98.25	383.5	117.5	119
2014	S2	3175	3175	Control	4	NA	1	35.9	0	0	NA	0	0	1	F	40	Negative	4/11/2012	NA	0	1	1	2763	494.25	79.5	723.5	766.25	491.5	82	2440.75	198.5	2071.5	2236.25	140.5	124.25	223.5	285.25	133.75	304.75	170.5	159.25
2014	S2	3175	3175	Control	4	NA	1	36.8	0	0	NA	0	0	1	M	6	Negative	4/11/2012	NA	0	1	1	2890	50.5	67.5	75.25	195.5	615	516.5	50.5	104.25	49.5	85.75	47	49	159	207.5	115	106	136.25	121
2014	S2	3175	3175	Control	4	NA	1	36.8	0	0	NA	1	0	1	F	26	Negative	4/11/2012	NA	0	1	1	2733	106.75	79	146.5	539	233.25	75.25	163	118.25	842.75	2444.75	244.75	63.5	208	213	117	338	145.75	141.25
2014	S2	3175	3175	Control	4	NA	0	35.6	0	0	NA	1	0	1	M	8	Negative	4/11/2012	NA	0	2	1	2725	44.75	67	69	183.5	71.5	62	136.5	98.5	46	92.5	44.5	50.5	104	190.5	112	86.75	128.5	111.75
2014	S2	3175	3175	Control	4	NA	0	35.9	0	0	NA	1	0	1	M	25	Negative	4/11/2012	NA	0	1	1	2744	452.25	71.25	86	404	135.25	64.5	271.25	148.5	2562.75	1942.5	54	52.5	161	203.5	123.25	325	155	146.75
2014	S2	3175	3175	Control	4	NA	1	36	0	0	NA	1	0	1	M	2	Negative	4/11/2012	NA	0	1	1	3130	49	70	89.75	170.25	55.5	57.75	51	115	50	55.5	50.5	55	98	161.5	119.5	102	137.75	132
2014	S2	3175	3175	Control	4	NA	1	35.9	0	0	NA	1	0	1	F	28	Negative	4/11/2012	NA	0	1	1	2693	285.5	67	73	225.5	310.25	63.5	1296.75	215.25	79	816	399.5	96	244.5	1236.25	112.75	293.5	139	116.25
2014	S2	3175	3175	Control	4	NA	0	35.9	0	0	NA	0	0	1	M	59	Negative	4/11/2012	NA	0	1	1	3134	1397.25	129	612.5	468.5	242.25	92.5	6098.5	202.5	1584.75	1138.25	1356	1128.75	801.5	795	237.5	565.25	286.5	237
2014	S2	3175	3175	Control	4	NA	0	36.4	0	0	NA	0	0	1	M	42	Negative	4/11/2012	NA	0	1	1	2648	333.25	113.5	185	371	1204.5	171.75	11283.5	197	767.75	2322.5	147.25	126.75	369.75	326.25	212	217.5	244.75	217.75
2014	S2	3175	3175	Control	4	NA	1	36.3	0	0	NA	1	0	1	M	11	Negative	4/11/2012	NA	0	1	1	2730	71.5	102.5	117.75	350	71.25	79.75	83	169.5	81.5	91.25	65.75	85.75	331	341.5	187.5	195.5	377.25	216.5
2014	S2	3175	3175	Control	4	NA	0	36.6	0	0	NA	0	0	1	F	32	Negative	4/11/2012	NA	0	1	1	2669	824.75	358.5	1811	439.5	689.25	88.75	5250.5	178.5	2051.5	2051.75	492	176.5	264	277.75	161	163.75	200	184.5
2014	S2	3175	3175	Control	4	NA	1	36.3	0	0	NA	1	0	1	M	35	Negative	4/11/2012	NA	0	1	1	2523	464	531	734	301.25	5560	109.5	3280	150	679.5	831	473.75	106.5	257.75	462.5	146	294.25	179	160
2014	S2	3175	3175	Control	4	NA	1	36.6	0	0	NA	0	0	1	F	38	Negative	4/11/2012	NA	0	1	1	2741	586.5	170	157.5	464.75	1994.5	126.25	137.25	222.75	164.5	222.5	850	125.25	412.75	451.25	237.5	345.75	350	288.25
2014	S2	3175	3175	Control	4	NA	0	36.2	0	0	NA	0	0	1	F	30	Negative	4/11/2012	NA	0	1	1	2621	722.5	394	394	1475	1167.25	114.5	3908	325.5	1095	1983	2360.5	475.25	1003.25	1718	426.5	325.5	326.25	324
2014	S2	3175	3175	Control	4	43.87	0	36.1	0	0	NA	0	0	1	M	13	Negative	4/11/2012	NA	0	1	1	2799	77.75	110.75	142.5	372.25	85.25	87	105.5	217	225.25	480.25	70	76	237.25	NA	240.25	174	258.5	251.5
2014	S2	3175	3175	Control	4	NA	0	35.9	0	0	NA	0	0	1	F	14	Negative	4/11/2012	NA	0	1	1	2658	105.25	110.5	172.75	302	71.5	86	NA	268.75	659.75	NA	61.75	68.5	224.25	305.5	181.5	133.5	213.5	207.75
2014	S2	3175	3175	Control	4	NA	1	36.2	0	0	NA	0	0	1	F	13	Negative	4/11/2012	NA	0	1	1	2886	42.5	56.5	59.5	145.5	43.5	44.75	38.5	87	41	42.75	41.25	41.5	127	148.25	100.5	76	106.5	99.5
2014	S2	3175	3175	Control	4	NA	0	35.8	0	0	NA	0	0	1	F	11	Negative	4/11/2012	NA	0	1	1	2715	38.5	56.5	60.25	142	39.5	46	48.75	84.25	40.25	92.5	42	44	101.25	137	95.25	80	108.5	104.5
2014	S2	3175	3175	Control	4	NA	1	35.6	0	0	NA	1	0	1	F	18	Negative	4/11/2012	NA	0	1	1	2719	148	276.5	96.25	270.5	1831	66	442.75	134.75	3013	3564.75	64.5	76.75	153	257	157	198	168.25	166.5
2014	S2	3175	3175	Control	4	NA	1	36	0	0	NA	0	0	1	F	40	Negative	4/11/2012	NA	0	1	1	2350	2735.75	178.5	431.5	420.25	422.75	80.5	6090.5	299.25	1564.75	3604.5	1793	193.75	1015.5	1194.5	223.25	422.75	216.5	181.25
2014	S2	3175	3175	Control	4	NA	1	36.4	0	0	NA	0	0	1	M	12	Negative	4/11/2012	NA	0	1	1	2623	57.5	67	77.25	232.75	187.5	114.5	80	107.5	63.5	87.75	128	50	184	253.5	117.5	119	207.75	167
2014	S2	3175	3175	Control	4	NA	0	36.1	0	0	NA	0	0	1	F	15	Negative	4/11/2012	NA	0	2	1	3081	58.75	62.5	78	172.25	49.25	50	55	98.5	44.5	133	76	56.75	150	186	113	89.5	124.5	125
2014	S2	3175	3175	Control	4	NA	0	36.2	0	0	NA	0	0	1	M	42	Negative	4/11/2012	NA	0	2	1	2715	559.25	621	940	486.5	586.5	181.25	802.5	196	462.5	1363	106.25	499.5	259	475	180	1851.75	257.5	211.25
2014	S2	3175	3175	Control	4	NA	1	36.9	0	0	NA	0	0	1	M	48	Negative	4/11/2012	NA	0	1	1	3075	685	122.75	696	331.25	546.5	629.75	2607.75	243.75	1067	1258.5	138.75	100.25	233	384.25	215.75	440.5	280.5	229.75
2014	S2	3175	3175	Control	4	NA	1	36.8	0	0	NA	0	0	1	F	7	Negative	4/11/2012	NA	0	1	1	2841	72	96.25	120	309.5	63	75.5	79	171.5	68.5	207.5	58.25	70.75	258.25	461	170.75	127	186	198.5
2014	S2	3176	3176	Intervention	3	NA	0	36.3	1	NA	NA	0	0	1	F	18	Negative	2/11/2012	NA	0	1	1	2867	176	93.25	110.5	292.25	536.75	174.5	371.5	155	432.5	708.5	75.5	78	199	318.25	171.5	181	189.5	203
2014	S2	3176	3176	Intervention	3	NA	0	36	1	NA	NA	0	0	1	M	3	Negative	2/11/2012	NA	0	1	1	2886	54.5	78	97.5	591.25	58	67	68	135.75	56	135.25	56.5	58.75	141.5	224.75	137	118.5	177.25	171
2014	S2	3176	3176	Intervention	3	NA	0	37	1	NA	NA	1	1	1	F	25	Negative	2/11/2012	NA	0	1	1	2676	306	1270.25	1064.75	593.5	2343.75	137	3793	186	827.75	1100	160	92.5	388	466.5	192.75	1044.75	291.5	227
2014	S2	3176	3176	Intervention	3	NA	1	36.5	1	NA	NA	1	1	1	F	40	Negative	2/11/2012	NA	0	1	1	2772	1013.5	135.75	147.5	954.5	164	262.5	1466	200	134.5	368.75	510.25	267	437.25	308	174	171	246.5	213
2014	S2	3176	3176	Intervention	3	NA	0	36.1	0	0	NA	0	0	1	F	5	Negative	2/11/2012	NA	0	3	0	2738	31.5	43	41	57.5	36	39.5	46	50	34	51.75	42.5	50	180.75	185.5	62.5	58.5	66	77.5
2014	S2	3176	3176	Intervention	3	NA	0	36	1	NA	NA	0	0	1	F	6	Negative	2/11/2012	NA	0	1	1	2930	62.5	84.5	92	225.5	66.75	58.25	94.5	121.5	57	64	56	54.75	139.75	201	129.5	111.25	155.75	142.5
2014	S2	3176	3176	Intervention	3	NA	0	36.3	1	NA	NA	0	0	1	F	10	Negative	2/11/2012	NA	0	1	1	3140	61	87.75	106	284.75	58.5	69.5	66.5	150	64	88.5	63.5	68.25	175	270.75	161.5	141.75	178.5	181
2014	S2	3176	3176	Intervention	3	33.58	0	36.4	1	NA	NA	1	0	1	F	28	Positive	2/11/2012	Pv	1	1	0	2335	655	180.75	1625.5	434	863.5	98.5	2797.25	505.5	2636	2204	171.25	119.5	289.5	596	595.25	427.5	309.25	281.75
2014	S2	3176	3176	Intervention	3	28.02	0	36.3	1	NA	NA	0	0	1	M	11	Positive	2/11/2012	Pf	1	1	1	2861	912	249	482.5	394	1753	152.5	1498.25	299.5	433.5	1245	106.5	157.5	614.5	1326	239	392.75	281.75	328.75
2014	S2	3176	3176	Intervention	3	NA	0	36.2	1	NA	NA	1	1	1	F	21	Negative	2/11/2012	NA	0	1	1	2709	397.75	337.5	206.5	1756	2806.25	240.75	8941.25	336.75	1851.75	4229	127.5	123.25	424	721	260.75	239.5	330	286.75
2014	S2	3176	3176	Intervention	3	NA	0	36.3	1	NA	NA	1	0	1	M	12	Negative	2/11/2012	NA	0	3	1	2198	33	35	35	46.75	36.25	43	69.5	41	31.5	59.5	32.5	52.25	187	185.25	59	39.25	54	46
2014	S2	3176	3176	Intervention	3	NA	0	36.8	1	NA	NA	0	0	1	M	13	Negative	2/11/2012	NA	0	1	1	2575	60.25	76	80.5	199.5	109.25	60.25	54	107.5	53.5	60.75	50.75	54	118.5	202	118.5	107	127	128.5
2014	S2	3176	3176	Intervention	3	NA	0	36.4	1	NA	NA	0	0	1	F	10	Negative	2/11/2012	NA	0	1	1	3096	58.5	77.5	85	246.5	170.5	130	107.75	140.5	112	382.75	54	59.75	336.5	424.25	123	108.75	143.5	144.75
2014	S2	3176	3176	Intervention	3	NA	0	36	1	NA	NA	0	0	1	M	3	Negative	2/11/2012	NA	0	3	1	2378	27.5	32.5	31.5	41.5	29.5	35.75	28	39.25	26	51	33.5	32.5	53	56.5	46.5	34.5	46	44
2014	S2	3176	3176	Intervention	3	NA	0	36.4	1	NA	NA	1	0	1	F	33	Negative	2/11/2012	NA	0	1	1	2855	561	92	113	455	817.5	79.5	537.5	274.25	218.5	457.5	2382.25	1142.75	NA	352.75	170.5	168	207.5	194.75
2014	S2	3176	3176	Intervention	3	NA	0	36.5	0	0	NA	0	0	1	M	3	Negative	2/11/2012	NA	0	1	1	2931	92	118.5	140.25	545	109	115	87.5	202	2650.5	109.5	79	99.5	244.5	383.75	220	180.25	228	248
2014	S2	3176	3176	Intervention	3	NA	0	36.3	1	NA	NA	1	0	1	F	26	Negative	2/11/2012	NA	0	1	1	2626	758.5	3140.75	921.5	535.5	20960	2761	3873.75	402.5	1736	2847.5	1232.75	208.5	590.25	424.5	263	562.5	296.5	254
2014	S2	3176	3176	Intervention	3	39.85	0	36.4	1	NA	NA	1	1	1	M	36	Positive	2/11/2012	Pv	1	1	1	2887	2484.5	168.75	182	968.25	3933	257.5	4010.5	484	667.25	5383	768	490.75	663.75	1520	303.75	459	271	297.25
2014	S2	3176	3176	Intervention	3	NA	0	36.3	1	NA	NA	0	0	1	M	14	Negative	2/11/2012	NA	0	1	1	2705	301	247	123.25	320.75	394	109.25	403.75	168	279.75	615.5	107.25	112.5	227.75	384.5	171.75	404.5	215.5	197
2014	S2	3176	3176	Intervention	3	NA	1	36.7	1	NA	NA	1	0	1	F	38	Negative	2/11/2012	NA	0	1	1	2690	775.5	242.75	4557.5	379	NA	146	4763.75	255.5	560	2050.5	288	381.5	606.75	422	220.5	619.5	221.5	267.75
2014	S2	3176	3176	Intervention	3	NA	0	36.3	1	NA	NA	0	0	1	F	15	Negative	2/11/2012	NA	0	1	1	3290	67.5	84.25	105	242	317.75	262.75	73	142.75	85.25	94	63.25	115.5	353.75	390.25	147.75	196.75	181	171.25
2014	S2	3176	3176	Intervention	3	NA	0	36.3	1	NA	NA	1	0	1	F	44	Negative	2/11/2012	NA	0	1	1	2738	613.5	6686.75	321.25	610	3782.5	98.75	5473	283.5	4090	6303.75	272	374	484.25	842	198.75	669	223	201.5
2014	S2	3176	3176	Intervention	3	NA	0	36.4	1	NA	NA	1	0	1	F	16	Negative	2/11/2012	NA	0	1	1	2996	147	145	6170	348.5	173.25	88.5	331	187.5	456	1036.5	91.5	99	256	320.25	193.25	260.5	217.5	216.5
2014	S2	3177	3176	Intervention	3	40.82	1	37.1	1	NA	NA	1	1	1	M	75	Positive	2/11/2012	Pf	1	1	0	3046	2492	125.25	268.25	401.5	2181.5	131.75	5597.25	254	1054.75	1453.75	2629.25	964.5	1170.5	614	373.5	502	259.25	271
2014	S2	3177	3176	Intervention	3	NA	0	37.3	1	NA	NA	0	0	1	F	2	Negative	2/11/2012	NA	0	3	1	2778	23	29.5	27	40	27	29	25.5	34.75	26	56.5	29	28	41	61	42.75	28.5	37.5	36.25
2014	S2	3177	3176	Intervention	3	NA	1	37.2	1	NA	NA	0	0	1	M	3	Negative	2/11/2012	NA	0	1	1	3248	43.75	57	59.5	141.5	62.5	53.75	45.5	82	47.5	45.5	47.5	50	129.75	182.5	90.5	75.5	105	97
2014	S2	3177	3176	Intervention	3	38.66	0	36.8	1	NA	NA	1	1	1	M	40	Positive	2/11/2012	PfPv	2	1	0	2618	981.5	826.5	8814	495.75	382.75	165.5	8487	263.75	6052.25	12189.75	254.5	107.25	309	779.75	172.5	969.75	203	226
2014	S2	3177	3176	Intervention	3	NA	0	36.9	1	NA	NA	0	0	1	F	8	Negative	2/11/2012	NA	0	3	0	2661	1320.75	51	69.5	675	16020.5	213.25	485.25	79.25	101.75	216.25	66.75	147	235.5	252.5	116	81.25	94	78
2014	S2	3177	3176	Intervention	3	NA	1	36.8	1	NA	NA	0	0	1	F	3	Negative	2/11/2012	NA	0	1	1	3173	51.25	65	202.75	175.75	211.25	52.5	92.75	104.75	85.75	146.5	55.75	54	105	184	116.5	99.25	121.5	122.25
2014	S2	3177	3176	Intervention	3	NA	1	37.3	1	NA	NA	1	1	1	M	17	Negative	2/11/2012	NA	0	1	1	2670	101.5	342	255.5	327.25	8292.75	107.25	758	180.25	3293.5	6089.5	77.25	121.25	638.25	792	187	445.5	217.5	207.75
2014	S2	3177	3176	Intervention	3	NA	0	37.1	1	NA	NA	1	1	1	F	3	Negative	2/11/2012	NA	0	1	1	3257	61.25	64.5	70	159.5	112	59	61.5	95.25	77.5	132.25	49.75	50.75	158.75	191.75	108.75	87.5	127.5	112.5
2014	S2	3177	3176	Intervention	3	NA	0	37.1	1	NA	NA	0	0	1	F	8	Negative	2/11/2012	NA	0	1	1	2795	102	134.75	147	363.25	101.5	104.75	121.75	212	125	353	85	99.5	605.5	692.5	196.25	185.5	275.75	243.5
2014	S2	3177	3176	Intervention	3	NA	0	37.3	1	NA	NA	1	0	1	M	18	Negative	2/11/2012	NA	0	1	1	2702	382	117.5	153.5	433.5	11687	1237.5	167.75	295.5	283	2462.75	92.25	143.5	1058.5	1504.75	384.75	201	238.75	321.5
2014	S2	3177	3176	Intervention	3	NA	1	36.7	1	NA	NA	1	1	1	M	30	Negative	2/11/2012	NA	0	1	1	2850	369.75	123.75	1114.75	316	367.75	202.5	9817.75	343.5	515.5	2226.25	193.25	94	378	633	175.5	337	194.5	194.5
2014	S2	3177	3176	Intervention	3	NA	1	37.3	1	NA	NA	0	0	1	M	2	Negative	2/11/2012	NA	0	1	1	2770	64.5	84.5	106.5	225.75	58.5	70.25	58.25	146.25	83.25	154	89.5	95	184.25	8227	1073.75	157	171.5	163.25
2014	S2	3177	3176	Intervention	3	NA	0	36.6	1	NA	NA	1	1	1	M	55	Negative	2/11/2012	NA	0	1	1	2635	2039.75	4934.75	2525.5	2126.25	247	234.5	10126.5	348.25	2805	3346.5	547.25	810.5	1166.5	1792.5	650	766	268	334.5
2014	S2	3177	3176	Intervention	3	NA	0	36.5	1	NA	NA	1	0	1	F	7	Negative	2/11/2012	NA	0	1	1	2675	59	83.5	150	192	217	180.75	94.25	101	90.5	87.5	50.75	57.25	140	216	110	100.75	129.75	120.25
2014	S2	3177	3176	Intervention	3	NA	0	36.3	1	NA	NA	1	0	1	F	52	Negative	2/11/2012	NA	0	1	1	2729	871.5	234.5	631.5	652.75	942.25	454.5	626	307	656.5	1036	575.5	307	494.75	1696.5	297	516.5	292	358.25
2014	S2	3177	3176	Intervention	3	NA	1	37.2	1	NA	NA	1	1	1	M	30	Negative	2/11/2012	NA	0	1	1	2815	571.25	208.5	122.25	267	96.5	71	817	135.75	102.25	324.5	256.5	474	405.25	327.5	152.25	202.75	183	171.75
2014	S2	3177	3176	Intervention	3	NA	1	37.3	1	NA	NA	1	0	1	M	11	Negative	2/11/2012	NA	0	1	1	2767	65.5	89.5	90	221	58.5	64.75	66.75	128.75	273	117	57.5	71.5	1070	1146.5	138	111.5	174	161
2014	S2	3177	3176	Intervention	3	NA	0	36.8	1	NA	NA	1	0	1	F	28	Negative	2/11/2012	NA	0	1	1	2573	155.75	114	555.5	269.75	109	76.75	779	139.5	72.5	2979.5	71.5	98	302	342	140	150.75	176.25	165.5
2014	S2	3177	3176	Intervention	NA	NA	0	36.7	1	NA	NA	NA	NA	NA	F	5	Negative	2/11/2012	NA	0	1	1	2533	58.5	70.25	114.25	191.5	51.5	56.25	62	102.5	58.5	110	56.5	60.25	118.5	199.5	117.5	96.5	136	122.5
2014	S2	3177	3176	Intervention	3	NA	0	36.4	1	NA	NA	1	0	1	M	13	Negative	2/11/2012	NA	0	1	1	2818	98.5	475.25	655.5	320	7858.5	186.75	789.25	178.5	3724.75	4130	83.75	90	478	550.5	182.5	154	211.25	245.25
2014	S2	3177	3176	Intervention	3	40.8	1	37.4	1	NA	NA	1	1	1	M	67	Positive	2/11/2012	Pf	1	1	1	2241	1217.75	1876.25	939.25	2517.5	445	314.25	29951.25	393.25	10050	13786.75	303.5	204.5	621	2717.5	277.75	413.25	322.75	331.75
2014	S2	3177	3176	Intervention	3	NA	0	36.1	1	NA	NA	1	0	1	F	11	Negative	2/11/2012	NA	0	1	1	2612	4539	107.25	122.5	396	2380.75	126	24393.75	168.75	1349.75	1930.25	71.25	74	220.5	460	186.5	156.5	206.25	194.5
2014	S2	3177	3176	Intervention	3	NA	0	36.8	1	NA	NA	1	1	1	M	27	Negative	2/11/2012	NA	0	1	1	2427	274	90	723.5	493	378.75	119.25	309.5	126.25	1187.25	2206	82.5	88.5	202.5	249.5	127.25	1184.75	132.25	143.5
2014	S2	3177	3176	Intervention	3	NA	0	36.6	1	NA	NA	0	0	1	M	5	Negative	2/11/2012	NA	0	1	1	3119	52	66	89	181	49.5	53	55	100	62.5	102	52	56.75	2308.25	1924	113	110.5	124	134.5
2014	S2	3177	3176	Intervention	3	NA	0	36.7	1	NA	NA	0	0	1	F	15	Negative	2/11/2012	NA	0	1	1	2805	104.25	233.75	163.25	399.75	225.5	211.5	2071	237	545	1171	79	213.75	298.5	502	210.5	1074.25	270.75	254
2014	S2	3179	3179	Intervention	3	NA	0	35.1	1	NA	NA	0	0	1	F	5	Negative	2/11/2012	NA	0	1	1	2988	62.5	79.75	91.5	250.5	80.5	88.75	90	129	72.25	85.75	66.5	67	151.5	234.25	139	143	179.5	161.5
2014	S2	3179	3179	Intervention	3	NA	1	35.4	1	NA	NA	0	0	1	F	16	Negative	2/11/2012	NA	0	1	1	2448	342.25	737	114.5	275.25	4414	116.25	5048	158	1388	3492.75	60	72.5	401	522	241.5	610.25	197.75	179
2014	S2	3179	3179	Intervention	3	NA	0	35.6	1	NA	NA	0	0	1	F	16	Negative	2/11/2012	NA	0	1	1	2950	74.5	286.5	3220	422.5	715	83	497.25	161.5	1326	996.25	59.5	73	278.25	318.75	178	342.25	216	184.25
2014	S2	3179	3179	Intervention	3	NA	1	35.1	1	NA	NA	0	0	1	M	25	Negative	2/11/2012	NA	0	1	1	2534	1029	206	261.75	1204.25	772.5	105	2800.75	522.5	674.5	2149.75	332.5	94	535.75	513	255.75	415	415	300
2014	S2	3179	3179	Intervention	3	NA	1	36.4	0	0	NA	0	0	1	M	22	Negative	2/11/2012	NA	0	2	1	2711	258.25	1840.5	2969.5	655.5	4075	162	20014.5	361	8941.75	10614.75	77	79.75	379.75	605	218	394.75	262.25	235
2014	S2	3179	3179	Intervention	3	NA	1	35.8	1	NA	NA	1	0	1	F	50	Negative	2/11/2012	NA	0	1	1	2856	1272.5	129	243	368	270	93.5	602.25	216	182.25	199.5	612	427.75	984.75	459.75	204.25	533.25	258.25	228.75
2014	S2	3179	3179	Intervention	3	NA	0	35.6	1	NA	NA	1	0	1	F	18	Negative	2/11/2012	NA	0	1	1	2967	85.75	1595.75	1068.75	364.75	225.75	77.5	290.5	149.5	5379.5	3527	77.5	75.5	355.25	669.5	153	387	202	187.25
2014	S2	3179	3179	Intervention	3	NA	0	36.2	1	NA	NA	0	0	1	M	9	Negative	2/11/2012	NA	0	1	1	2937	74.5	142.5	105	299.75	472.5	122	8530.75	185.75	509	931	97.75	106.5	417.75	485.25	145	173	192.5	178.5
2014	S2	3179	3179	Intervention	3	NA	1	36.1	1	NA	NA	0	0	1	F	15	Negative	2/11/2012	NA	0	1	1	3128	69.25	95.75	158.5	303	2903.5	203.5	354	173	168	277.5	70	82.75	276	363.25	162.25	172.75	220	182.25
2014	S2	3179	3179	Intervention	3	NA	0	36.5	1	NA	NA	0	0	1	M	12	Negative	2/11/2012	NA	0	1	1	2991	54	71	75.5	202	66	55.75	120.75	103.5	68.5	57	71.5	58.5	149	197.25	116.5	163.25	144.25	134
2014	S2	3179	3179	Intervention	3	NA	0	36.1	1	NA	NA	0	0	1	M	8	Negative	2/11/2012	NA	0	2	1	3193	72	86	89	263	893.25	74	70.25	138	77.25	199.75	59	62.5	316.25	349	140.75	130.75	173	161.75
2014	S2	3179	3179	Intervention	3	NA	0	36	1	NA	NA	0	0	1	M	13	Negative	2/11/2012	NA	0	1	1	2304	54	64.25	70.5	189.75	43.5	68	803.5	90	78.25	69.75	50.5	53	126.5	203.5	103.5	87.5	124	114.5
2014	S2	3179	3179	Intervention	3	NA	0	35.2	1	NA	NA	1	0	1	M	53	Negative	2/11/2012	NA	0	1	1	3188	593.5	91	156.5	290	323	66	2297.5	160.5	616	759	309	152	366.5	318.25	184	216.25	191.25	197.75
2014	S2	3179	3179	Intervention	3	NA	0	35.3	1	NA	NA	0	0	1	M	16	Negative	2/11/2012	NA	0	1	1	2831	132.25	80.25	1113	238	1029	93.25	126.5	119.75	890	1465.25	72.5	54.5	134.5	222	129.5	187	150.75	148
2014	S2	3179	3179	Intervention	3	39.15	1	37	1	0	NA	1	0	1	M	8	Positive	2/11/2012	Pv	1	3	0	2886	43	61.5	57	1386.5	6694	1138.5	461	121.25	3385.25	4789.75	46	111.5	184	249	69.5	127	100	71.5
2014	S2	3179	3179	Intervention	3	NA	1	36.2	1	NA	NA	1	0	1	F	30	Negative	2/11/2012	NA	0	2	1	2791	1165.5	92.75	1094	433.5	1841.25	79.25	3138	221	913	1464.25	128.25	103	257	1464.5	156.5	430	186.5	182.75
2014	S2	3179	3179	Intervention	3	NA	1	36.5	1	NA	NA	1	0	1	M	13	Negative	2/11/2012	NA	0	1	1	3253	120.25	101.25	739	278	1147.75	385.5	425.75	153.5	105.5	828.75	114.5	65.75	216	303.5	146.5	128.5	179.5	175
2014	S2	3179	3179	Intervention	3	NA	0	35.2	1	NA	NA	1	0	1	M	70	Negative	2/11/2012	NA	0	1	1	2648	2734.25	90.75	245.25	286	2675.75	92.25	5954.5	148.5	2043.5	2493	1093.25	267	1008.75	886.75	171.5	467	182	157.5
2014	S2	3179	3179	Intervention	3	NA	1	35.6	1	NA	NA	1	0	1	F	59	Negative	2/11/2012	NA	0	1	1	2896	1992.5	156.5	547.5	951.75	827	92	4939.25	153.5	2031.75	3435.75	951.5	461	541.25	553.5	190.5	945.75	188.5	169
2014	S2	3179	3179	Intervention	3	NA	0	35.8	0	1	NA	1	0	1	M	9	Negative	2/11/2012	NA	0	1	1	2853	484	239.5	171	583	8724	791.75	4518.75	232.5	1510.25	3738.5	92.25	90	242	552	203.5	222	330	274.5
2014	S2	3179	3179	Intervention	3	NA	1	36.4	0	1	NA	0	0	1	M	13	Negative	2/11/2012	NA	0	1	1	2557	60.5	85	2112	229.75	136.5	79	91.25	127.75	957	264	62	70.5	957.75	785.5	147	116	158.75	178.25
2014	S2	3179	3179	Intervention	3	NA	1	35.7	0	NA	NA	1	1	1	M	28	Negative	2/11/2012	NA	0	1	1	2689	1003.5	103.25	142.5	246.5	326.75	99	438	146.75	735	1455.5	756	278	993	333	177	205.75	190	166.25
2014	S2	3179	3179	Intervention	3	NA	0	34.9	1	NA	NA	0	0	1	F	5	Negative	2/11/2012	NA	0	1	1	3066	47	56.25	63.5	151.25	40.5	47.25	46.25	84.5	50.5	53.5	54.5	52.5	127.75	160.25	94.25	92.75	114	109
2014	S2	3179	3179	Intervention	3	NA	0	36.1	0	0	NA	0	0	1	F	22	Negative	2/11/2012	NA	0	1	1	2923	204.5	84.5	103	245	436.75	67	192.75	123.5	121	863.5	590.75	107.25	261.5	288.5	142.25	860	193.5	170.25
2014	S2	3179	3179	Intervention	3	NA	0	36.1	0	NA	NA	0	0	1	F	3	Negative	2/11/2012	NA	0	1	1	2683	55.5	75	80.5	181.75	53	62	60.25	120	58	70.5	53	55	124	213.5	122.75	110	142.25	151.75
2014	S2	3179	3179	Intervention	3	NA	1	36	0	NA	NA	0	0	1	F	16	Negative	2/11/2012	NA	0	1	1	2596	100.75	163.75	1649	421.5	5977.5	111	1430.25	304.5	1195.5	1154	77	111.5	275.25	400.5	194.5	204.5	249	221.5
2014	S2	3179	3179	Intervention	3	NA	1	37.4	1	NA	NA	1	0	1	F	18	Negative	2/11/2012	NA	0	2	1	2885	66.25	222.75	467.75	264.5	269.5	66.5	152.25	301.25	224	516	87.5	66.5	184	353	143	208.75	180	186
2014	S2	3179	3179	Intervention	3	NA	1	36.3	1	NA	NA	0	0	1	M	16	Negative	2/11/2012	NA	0	1	1	2721	451.75	2201.25	145.75	421.5	344	78.5	3258	121.75	480	1734.25	728	108.25	363.75	300	136.25	126.75	151	154.5
2014	S2	3179	3179	Intervention	3	NA	1	37.1	1	NA	NA	0	0	1	F	50	Negative	2/11/2012	NA	0	1	1	2770	2053.25	546	618.25	481.5	752.5	211.75	4646	289	6492.5	7085	1265.25	410.5	858	490.5	242.5	824.5	317	281.5
2014	S2	3179	3179	Intervention	3	NA	0	36.5	1	NA	NA	0	0	1	F	25	Negative	2/11/2012	NA	0	1	1	2618	1273.75	199.5	264.75	596.75	3282.5	163.5	217.25	375.5	1876.75	3220	172.5	159	521.75	862	NA	614.25	461.75	376.5
2014	S2	3179	3179	Intervention	3	NA	0	36.4	0	0	NA	1	0	1	F	23	Negative	2/11/2012	NA	0	1	1	2713	348	229.5	3494.25	592.25	463	166	6417.75	583.25	1228.25	1648.5	238.25	195.25	501	3417	2070.5	1042.25	300.75	317.75
2014	S2	3179	3179	Intervention	3	NA	0	35.8	0	1	NA	0	0	1	M	13	Negative	2/11/2012	NA	0	1	1	2965	74.5	96.5	3055.75	302	118	78	184.25	152	171.5	312.5	76	89.5	276.75	457	165	155	214.75	185
2014	S2	3179	3179	Intervention	3	NA	0	35.8	1	NA	NA	0	0	1	M	8	Negative	2/11/2012	NA	0	1	1	2905	73.5	123.25	2803	1195	129.5	94.5	1578.75	155.5	984	1992.25	57	67	222.75	308.25	168	612.5	181.5	192.5
2014	S2	3179	3179	Intervention	3	NA	0	36.2	1	NA	NA	0	0	1	M	20	Negative	2/11/2012	NA	0	1	1	2982	246.5	262.5	548	581.25	327.25	103.75	1939.5	244.5	1356.75	870	294	185.75	420	492.75	229	287.75	294	259.75
2014	S2	3179	3179	Intervention	3	NA	0	35.8	1	NA	NA	1	0	1	M	7	Negative	2/11/2012	NA	0	3	1	2817	31	39.5	35.75	67.5	257.5	43.5	36	46.75	59	91	34	37	93	131.5	54.5	43	61.5	48.75
2014	S2	3179	3179	Intervention	3	NA	0	36.9	1	NA	NA	0	0	1	M	3	Negative	2/11/2012	NA	0	1	1	2987	67.5	95.25	121.5	268	74.5	77	83.5	159.75	89.5	86.75	66.5	75.25	158.75	368.25	175	161.5	191.5	219.5
2014	S2	3179	3179	Intervention	3	NA	0	36.9	0	0	NA	1	0	1	F	5	Negative	2/11/2012	NA	0	1	1	2461	1114.75	172	13806.25	2481	851	643.5	27274.5	375.5	11986.5	17679.75	226	332	540.5	791	295.75	398.5	394.75	393.75
2014	S2	3179	3179	Intervention	3	NA	0	35.6	0	1	NA	0	0	1	M	10	Negative	2/11/2012	NA	0	1	1	2478	76.25	108.5	2163.5	339	75.5	78.25	607	171	623.5	705	66.75	74.5	188	351	187.5	171.5	204.5	219.5
2014	S2	3179	3179	Intervention	3	NA	0	35.1	0	1	NA	0	0	1	F	16	Negative	2/11/2012	NA	0	2	1	3124	84.5	111.25	298.75	302.5	387.5	350.5	5509.5	187.5	546.5	1019.75	77	79.5	223.5	355.5	178	471.75	214.25	197.25
2014	S2	3181	3181	Intervention	7	NA	0	36.5	0	0	NA	1	0	2	F	25	Negative	1/11/2012	NA	0	1	1	2561	1303.75	233.5	242.5	619	373.75	137.75	348.5	298	308.5	3188.75	1015	553.25	585	716	303	545	526.75	413.25
2014	S2	3181	3181	Intervention	7	NA	0	37	1	1	NA	1	0	1	F	45	Negative	1/11/2012	NA	0	1	1	3044	1314.75	1839.5	268.5	1145.25	1032	84.5	2088.25	295.75	2362.25	3275.75	1662.5	1207.25	1585.5	446.5	306	308.75	214.75	211.75
2014	S2	3181	3181	Intervention	7	NA	0	37	1	1	NA	1	0	1	F	35	Negative	1/11/2012	NA	0	1	1	2748	2972	3443	1099	556.75	1450.5	572	6079	443.5	6233.5	16545.5	1350	1126.25	1251	1540	456	2886.75	329.25	321.5
2014	S2	3181	3181	Intervention	7	NA	0	37	0	1	NA	1	0	1	F	50	Negative	1/11/2012	NA	0	1	1	2515	561.75	746.25	1503.5	538.25	1065.5	782	5891	443.5	1370.75	1610.75	317.25	541.5	581.25	1918.5	609.5	385.5	312.5	292.25
2014	S2	3181	3181	Intervention	7	NA	0	37	1	1	NA	1	0	1	M	3	Negative	1/11/2012	NA	0	1	1	2784	52.5	71.5	81.75	210.75	67.5	64	66.5	112	53	65	52.5	56.75	183.5	276.75	251.5	126	136	149
2014	S2	3181	3181	Intervention	7	NA	0	37	1	1	NA	1	0	1	F	29	Negative	1/11/2012	NA	0	2	1	2769	3579.5	3225.5	1036.25	849.5	1499.25	145.25	24953.25	627.25	6112.5	12232.75	370.5	135.5	494.75	1709.75	363.75	1366	411	533.5
2014	S2	3181	3181	Intervention	7	NA	0	36.5	1	0	NA	0	0	1	F	4	Negative	1/11/2012	NA	0	1	1	2898	94	141.5	138.5	319.5	156.5	93.5	345	201.75	97.25	165	82	91.75	394	506.75	425	204.25	244	222
2014	S2	3181	3181	Intervention	7	NA	0	36.5	0	0	NA	1	0	1	F	25	Negative	1/11/2012	NA	0	1	1	2790	546.25	167	117.25	229.25	3087	132	6904.5	139.75	13540.25	14671.5	833.5	578.5	572	850	155.5	1050.5	258	158
2014	S2	3181	3181	Intervention	7	NA	0	37	1	1	NA	1	0	1	F	22	Positive	1/11/2012	Pf	1	1	1	2423	1564.75	3181.5	18630	2149.75	4653.5	524	28395.25	254	4613	18429	298.5	1173.5	516	683	126.5	2061.5	97.25	118.75
2014	S2	3181	3181	Intervention	7	NA	0	37	0	1	NA	0	0	1	F	10	Negative	1/11/2012	NA	0	2	1	3054	231.5	65.5	597.5	110	15733	1210	1516.5	104	1177.75	1764.75	52	97	156.75	158.5	81.75	145.25	93	86.75
2014	S2	3181	3181	Intervention	7	NA	0	37	1	1	NA	1	0	1	F	21	Negative	1/11/2012	NA	0	1	1	2718	950.75	1208.25	393.75	1954.25	5807.5	148.5	17050	309.5	25215.75	26104.25	1291.25	95.5	222.5	287.25	140.75	527.25	132	133.75
2014	S2	3181	3181	Intervention	7	NA	1	37	1	1	NA	1	0	1	F	6	Negative	1/11/2012	NA	0	3	1	2871	269.5	61	38.5	51	1081.75	68.25	132.5	51	152	397.5	52	50.75	75.5	383	65	45.5	49.25	56.5
2014	S2	3181	3181	Intervention	7	NA	1	37	1	NA	NA	1	0	1	F	20	Negative	1/11/2012	NA	0	1	1	2766	531.75	126	1815	827	267	60	6585.25	114	4960.25	5366	346	556.5	480	3662.75	350	240.75	129	97
2014	S2	3181	3181	Intervention	7	NA	0	37	1	1	NA	1	0	1	M	55	Negative	1/11/2012	NA	0	1	1	2816	2340	379.75	1677.5	949.5	2231.75	63.5	3991	155.5	8523.5	2771.75	1035.5	590.5	662.75	494.25	109.75	237.25	287.75	124.25
2014	S2	3181	3181	Intervention	7	NA	0	37	1	1	NA	1	1	1	M	45	Negative	1/11/2012	NA	0	2	1	2602	564.75	54.75	74	343	173	77.75	16632.5	82.5	1330.75	2751.75	1319	127.25	542.75	165	81.5	341	84	98.25
2014	S2	3181	3181	Intervention	7	NA	1	37.5	1	1	NA	1	0	1	F	35	Negative	1/11/2012	NA	0	3	1	2636	4721.25	226	5951.5	1035.25	417.5	167.75	10406.5	126	5970.75	8912.5	3972.5	855.75	1860	761.5	152.25	11283.75	76.5	74.5
2014	S2	3181	3181	Intervention	NA	NA	0	36.5	1	1	NA	NA	NA	NA	F	2	Negative	1/11/2012	NA	0	1	1	3419	29	36	32	41.5	331.5	179.5	91	36	131	115	35.5	32.5	52	56.25	44.5	32	40	39.5
2014	S2	3181	3181	Intervention	7	NA	0	37	0	1	NA	1	0	1	F	35	Negative	1/11/2012	NA	0	1	1	2344	192.5	124.5	2093	703.5	2552.5	81	12495.5	258	4303.25	7542	91.5	148.25	142.5	536.5	198.25	2587	155	146.5
2014	S2	3181	3181	Intervention	7	NA	0	37.5	1	1	NA	1	0	1	M	5	Negative	1/11/2012	NA	0	1	1	2901	28.75	43.5	36	133.5	37.5	39.5	48.75	43.5	42.5	44	35.5	36.5	141.75	120.5	51.25	46	49.25	47.5
2014	S2	3181	3181	Intervention	7	NA	0	37	1	1	NA	1	1	1	M	50	Negative	1/11/2012	NA	0	1	1	2668	1134	4054.5	321.75	7013.5	4660.25	165.75	27341.25	788	18916	22589	195.25	1172.25	2800	3688	1896.75	9663	267.25	321.25
2014	S2	3181	3181	Intervention	7	NA	0	36.5	0	0	NA	0	0	1	M	14	Negative	1/11/2012	NA	0	1	1	2567	352	430.5	15589.25	2535	16132.25	3598.5	27764.5	442.5	20261	29637.75	58.25	197	645.25	893	156.75	427.5	148	121.5
2014	S2	3181	3181	Intervention	7	NA	0	37	1	1	NA	1	1	1	M	19	Positive	1/11/2012	Pf	1	1	1	2515	1568.75	1116.5	1905	773.25	2022.25	83.5	13705.5	174.75	10891.25	13473	200.25	530.5	530.25	542	162.25	927.5	152.25	146.5
2014	S2	3181	3181	Intervention	7	NA	0	37	1	1	NA	1	0	1	F	29	Negative	1/11/2012	NA	0	1	1	2748	933	140	158	2693	7146.5	56.5	8145.5	282.5	6244	7141.75	271.75	150.75	196	157.75	124.5	1582.75	117	85.5
2014	S2	3181	3181	Intervention	7	NA	0	37	1	1	NA	1	0	1	M	50	Positive	1/11/2012	Pv	1	1	1	2275	4935.5	15649	2976.5	2548	7473	78	23779.25	204.25	9549.75	23219.5	2010	495.5	944	2108	94	1077.75	79	87.5
2014	S2	3181	3181	Intervention	7	NA	0	37	1	1	NA	1	0	1	F	13	Negative	1/11/2012	NA	0	1	1	3069	106	226.75	73.5	133.25	578.75	353.25	325	152.75	175.5	329	71.25	91.5	159.5	200.5	114.5	101.25	273.5	120.25
2014	S2	3181	3181	Intervention	7	NA	1	37.1	1	1	NA	1	0	1	F	43	Negative	1/11/2012	NA	0	1	1	2891	980.5	165	104.5	1151.5	660.25	76.5	3879	182.25	4326	6277.25	1929	396	671.75	854	108	400.5	120.25	93.5
2014	S2	3181	3181	Intervention	7	40.5	0	37	1	1	NA	1	0	1	F	40	Positive	1/11/2012	Pv	1	1	0	2283	1678	2800.5	129.25	233.75	4651	1584.25	5841.5	323.25	3142	4341.75	1735.75	307	619	613.5	147	442	140.5	249.75
2014	S2	3181	3181	Intervention	7	NA	0	36.5	1	1	NA	1	0	1	F	28	Negative	1/11/2012	NA	0	1	1	2400	1579.25	93	1255	210	5356	302	4360.5	270.5	5401.75	6945.75	878.25	76	691.25	1584	341.25	159.25	122	106.5
2014	S2	3181	3181	Intervention	7	NA	0	36.5	1	1	NA	1	0	1	M	45	Negative	1/11/2012	NA	0	3	0	2447	1098.5	61.5	7007.75	180.75	802.75	72.25	415.25	134.25	7351	8351.75	2352.5	202.5	405.25	210	78.5	126	166.25	76.25
2014	S2	3181	3181	Intervention	7	NA	0	37	1	1	NA	1	0	1	F	6	Negative	1/11/2012	NA	0	2	1	3017	47.25	48.25	51.5	61	126.5	46.5	88	192.25	92.5	450.25	48.25	44	620	631.25	68.75	66.5	62	58.5
2014	S2	3181	3181	Intervention	7	NA	0	37.5	1	1	NA	1	0	1	M	32	Negative	1/11/2012	NA	0	1	1	2643	986	449.5	2409.75	1105	2647.5	1617	24652.75	408.25	10215.25	16887.5	201.25	482	360.5	1059.75	184.75	11362.25	640.5	414.75
2014	S2	3181	3181	Intervention	7	NA	0	36.5	1	1	NA	1	0	1	M	12	Negative	1/11/2012	NA	0	2	1	2771	92.75	86	69.5	177.75	94	54.75	2041.5	116	2927.25	3227.5	44.5	83	175.25	195.5	86.25	134	156.75	91
2014	S2	3181	3181	Intervention	7	NA	0	37	1	1	NA	1	0	1	F	6	Negative	1/11/2012	NA	0	1	1	2917	1041.5	39.5	41.5	120.25	51.75	43	128.5	47.5	115	261.5	43.75	40.5	376	268	71.5	83	60.5	49.5
2014	S2	3181	3181	Intervention	7	NA	0	36.5	1	1	NA	1	0	1	F	11	Negative	1/11/2012	NA	0	1	1	3124	43	57	44.25	62.75	3884.75	69	413.5	71	266.5	551.75	46.5	69.75	95.5	120	69.5	99.75	72.5	56
2014	S2	3181	3181	Intervention	7	NA	0	37	1	1	NA	1	1	1	M	20	Negative	1/11/2012	NA	0	1	1	2627	798	70.25	149.25	1084.5	3183.5	63.5	22480.5	222.5	6621.5	9711.25	1632.25	115	302.25	2848.5	814.5	595.75	268.75	106.5
2014	S2	3181	3181	Intervention	7	NA	0	37	1	1	NA	0	0	1	M	24	Negative	1/11/2012	NA	0	1	1	2796	168.75	900	608.75	564	984.5	117.5	7527.5	131.5	3547.25	5872.75	104.5	80.5	155.75	301	113.5	457.75	315	122
2014	S2	3181	3181	Intervention	7	NA	0	36.5	1	1	NA	1	0	1	F	9	Negative	1/11/2012	NA	0	1	1	3233	133.5	43.5	39	90.5	3919	80.5	255	57.5	148.25	116.5	38	104.25	72	104.75	58	53.5	70	55
2014	S2	3181	3181	Intervention	7	NA	0	37	1	1	NA	1	0	1	M	38	Negative	1/11/2012	NA	0	1	1	2828	1156.75	128.25	84.5	494.5	265.5	82.5	2109.5	74.25	2204.25	1970.25	756.5	212	488	497.25	752	614	97	77.5
2014	S2	3181	3181	Intervention	7	NA	0	36.5	1	1	NA	1	0	1	M	2	Negative	1/11/2012	NA	0	1	1	3141	34	48	46	55.75	36.5	43.25	38.5	56.5	33	36.5	39	39.75	82.5	106.25	62.75	53.5	68	59
2014	S2	3181	3181	Intervention	7	NA	0	37.5	1	1	NA	1	0	1	M	3	Negative	1/11/2012	NA	0	1	1	3093	39.5	39.5	36.5	46.25	89.5	38	78.5	53.25	46.25	103.5	33	37.75	78	143.5	169.5	37	41.5	43.25
2014	S2	3185	3185	Control	3	NA	0	37.1	0	0	NA	0	0	1	M	55	Negative	5/11/2012	NA	0	1	1	2869	1089	48	589.5	380.5	763	61.5	4618.75	77.5	809.5	788.5	77.75	151.75	226	175	81.75	251.5	92.75	69.75
2014	S2	3185	3185	Control	3	NA	0	37	0	0	NA	0	0	1	F	22	Negative	5/11/2012	NA	0	1	1	2587	516.5	1718.25	612	296.25	2649	81.5	10871.5	104.5	5229.5	6756.5	120.75	61	130.5	132.5	70.5	444.5	86	74.25
2014	S2	3185	3185	Control	3	NA	0	37.1	0	0	NA	0	0	1	F	54	Negative	5/11/2012	NA	0	3	0	2694	754	46	51	192.5	974.5	337.5	1358.5	52.5	283.25	701.75	676.5	39.5	494.25	234.25	55	99	54	65.75
2014	S2	3185	3185	Control	3	NA	0	36.3	0	0	NA	0	0	1	F	6	Negative	5/11/2012	NA	0	1	1	3223	40	56	51.25	72.75	53	50	82	60.75	62	74.5	149	46.5	438.5	337.25	68.5	58.5	67	68.5
2014	S2	3185	3185	Control	3	NA	0	36.4	0	0	NA	0	0	1	F	23	Negative	5/11/2012	NA	0	1	1	2997	999.75	159.75	604.5	134	80.5	66.5	1457	137.25	834.25	1624	84.75	140	158.5	355	58.75	964.5	54	50.25
2014	S2	3185	3185	Control	3	NA	0	37.1	0	0	NA	3	0	1	F	54	Negative	5/11/2012	NA	0	1	1	3346	228.25	50.5	53.5	172.5	196	91	882.25	83.5	41	289.5	117	67.5	81	85	67	92.5	71.5	60
2014	S2	3185	3185	Control	3	NA	0	36.7	0	0	NA	0	0	1	M	3	Negative	5/11/2012	NA	0	1	1	3199	29.5	35.5	34.75	48	29	33	35	41	29	38	35	34.5	56	61	50.75	40.25	54.25	43
2014	S2	3185	3185	Control	3	NA	0	37.1	0	0	NA	0	0	1	F	3	Negative	5/11/2012	NA	0	1	1	3096	32.5	39.75	40	49.5	33.5	37.5	41.5	50.5	34	51.5	38.25	39	106	94.5	55	46.5	48	49
2014	S2	3185	3185	Control	3	NA	0	36.4	0	0	NA	0	0	1	F	7	Negative	5/11/2012	NA	0	1	1	3186	31.5	41.5	41	52.5	31	40.25	34	48.75	34	84.5	35	35.75	71	80.5	61	45.5	76.75	62.5
2014	S2	3185	3185	Control	3	NA	0	36.7	0	0	NA	0	0	1	F	13	Negative	5/11/2012	NA	0	1	1	3067	43.25	37	38	46.5	41	50	52.75	54.25	2694.5	49	34.25	39	56	73.75	51.25	41	50	49.75
2014	S2	3185	3185	Control	3	NA	0	37.2	0	0	NA	0	0	1	F	10	Negative	5/11/2012	NA	0	1	1	3245	47	38	38.5	49.5	32.25	47.5	49.5	53.5	53	134.5	34	36.25	170	189.5	56	64.5	70.75	53.25
2014	S2	3185	3185	Control	3	NA	0	37.2	0	0	NA	1	1	1	M	22	Negative	5/11/2012	NA	0	1	1	3378	34	43.5	32.5	103.25	66.5	36	1965	48.75	419.25	357.5	45	35.75	270.75	122.5	49.75	37	48.5	43.5
2014	S2	3185	3185	Control	3	NA	0	37	0	0	NA	1	0	1	F	20	Negative	5/11/2012	NA	0	2	1	2663	448	389.75	118	826.25	NA	3673.25	13433	280	NA	9818.75	107.5	163	427	3350.5	122	504.5	99.75	136.5
2014	S2	3185	3185	Control	3	NA	0	36.4	0	0	NA	0	0	1	F	13	Negative	5/11/2012	NA	0	2	1	3364	64.5	78.5	88	122	1549.75	83.25	112	97.25	209	350	49.5	66.75	146.5	217.5	122	171.75	134.5	135.5
2014	S2	3185	3185	Control	3	NA	0	36.6	0	0	NA	0	0	1	F	21	Negative	5/11/2012	NA	0	1	1	3301	449.5	42	58.5	203.5	956.25	161.5	738	58.5	241	449	197.25	60.75	261.5	297	58	106.5	55.5	60
2014	S2	3185	3185	Control	3	NA	0	36.4	0	0	NA	0	0	1	M	2	Negative	5/11/2012	NA	0	1	1	3333	29.5	39.5	39	48	31.75	37	34	48.75	30	41.75	33	33.5	81	126.25	54.25	42.5	51	49.5
2014	S2	3185	3185	Control	3	NA	0	36.4	0	0	NA	0	0	1	M	8	Negative	5/11/2012	NA	0	1	1	3071	32	45.5	53.5	59	45.25	61.25	51.5	59.25	36	82	39	41.5	85	102.5	65.5	55.25	58.5	61.75
2014	S2	3185	3185	Control	3	NA	0	37.3	0	0	NA	0	0	1	F	14	Negative	5/11/2012	NA	0	3	0	2791	31.25	37.5	54.5	53.5	554	50.5	175.75	62	55.5	150.25	37.75	37	92.75	119.75	52	50	48	49
2014	S2	3185	3185	Control	3	NA	0	36.8	0	0	NA	0	0	1	F	24	Negative	5/11/2012	NA	0	1	1	2892	87	49.5	164	418.75	2720	263	1359.25	65.75	759.25	1135	53.5	90	154.75	167.75	57.25	643.25	56.75	58
2014	S2	3185	3185	Control	3	NA	1	36.9	0	0	NA	0	0	1	F	22	Negative	5/11/2012	NA	0	1	1	3303	1654	52.25	38	149.5	544.75	198	344.25	52	483.5	794.5	40	36.25	238.75	210	56.5	55.5	72	55.5
2014	S2	3185	3185	Control	3	NA	1	37.1	0	0	NA	0	0	1	F	7	Negative	5/11/2012	NA	0	1	1	3602	27.5	38.25	37.5	47	54	66.5	55	42.75	35.5	62	35	40	94.25	217.75	53.5	53.5	46.5	47
2014	S2	3185	3185	Control	3	NA	1	36.7	0	0	NA	0	0	1	M	4	Negative	5/11/2012	NA	0	1	1	3430	NA	NA	NA	NA	NA	NA	NA	33.5	30.5	NA	34.5	33.5	NA	NA	NA	38	NA	NA
2014	S2	3185	3185	Control	3	NA	0	36.5	0	0	NA	0	0	1	F	70	Negative	5/11/2012	NA	0	1	1	3259	911	53.25	75.5	384.75	9220.75	131.5	1124.25	72.25	1913.75	2500.25	756	646	355.5	219	79	104	71	126
2014	S2	3185	3185	Control	3	NA	0	36.2	0	0	NA	0	0	1	F	28	Negative	5/11/2012	NA	0	1	1	3248	178	115.25	1379	104.5	299	54.5	605	75	847.25	1894.75	119.5	69	111.5	153.75	67.5	623.75	78	65.75
2014	S2	3185	3185	Control	3	NA	0	36.3	0	0	NA	0	0	1	M	6	Negative	5/11/2012	NA	0	1	1	3510	39.5	45.5	53.5	71.5	462.5	211.5	44.5	55	50.5	73	42.75	42.5	64.5	94.5	64.75	57.5	112.5	65
2014	S2	3185	3185	Control	3	NA	0	37	0	0	NA	0	0	1	M	15	Negative	5/11/2012	NA	0	1	1	3025	166	81.5	517.25	243	3709	116.5	833.5	210.5	336.25	1202	51	55	NA	218.75	115.5	189.75	291	127.5
2014	S2	3185	3185	Control	1	NA	0	36.4	0	0	NA	0	0	1	M	17	Negative	5/11/2012	NA	0	1	1	3390	26	32.5	32	38.5	37	33.5	37.5	36.5	37	48	36.5	45.5	159	143.5	45.5	39.5	51.5	41.25
2014	S2	3185	3185	Control	3	NA	0	36.7	0	0	NA	0	0	1	F	26	Negative	5/11/2012	NA	0	2	1	3322	172.5	181.75	195	68	680.25	53	1284.5	48.25	773.5	827.25	53	38.25	187.75	169.5	50.25	93.5	49	49
2014	S2	3185	3185	Control	3	NA	1	37.3	0	0	NA	0	0	1	F	6	Negative	5/11/2012	NA	0	3	0	2683	32.5	38	38	47	32	33.5	30.25	47.5	27.5	35.75	36.5	39	183	137.25	57	37	54.25	48.5
2014	S2	3185	3185	Control	1	NA	0	37	0	0	NA	0	0	1	F	55	Negative	5/11/2012	NA	0	1	1	3354	37.5	53.5	53.5	70	805.5	448.25	41	64.5	34.5	41.5	39	43.25	91.75	102.5	73	62.75	115.5	67.5
2014	S2	3185	3185	Control	1	NA	0	36.3	0	0	NA	0	0	1	F	3	Negative	5/11/2012	NA	0	1	1	3387	32.5	44.5	42.5	135	35.5	47	37.75	51	33	61.5	35.5	42.75	63.5	91.75	65.25	52	85.75	58.5
2014	S2	3185	3185	Control	3	NA	0	37.1	0	0	NA	0	0	1	F	7	Negative	5/11/2012	NA	0	1	1	3366	28	37	34	43	31.5	39	35.75	40.75	39.75	48.5	38.5	40.5	144.25	139	50.5	40.5	46.5	46.5
2014	S2	3185	3185	Control	1	NA	0	36.4	0	0	NA	0	0	1	F	43	Negative	5/11/2012	NA	0	2	1	3102	30.5	42	42.25	51.75	44	46	36	52.5	38.5	143.25	40.5	41	131.5	151.75	65.5	46.75	65.75	53.5
2014	S2	3185	3185	Control	1	NA	0	36.3	0	0	NA	0	0	1	M	4	Negative	5/11/2012	NA	0	1	1	3171	23	31	29	37.5	26	30.5	26	33	25.5	26	35.5	33.75	49	56	42.75	83.75	45.5	41.75
2014	S2	3190	3190	Control	4	NA	0	37	0	0	NA	1	0	1	F	55	Negative	2/11/2012	NA	0	1	1	2968	1730.75	50	47.5	282	187	55	3303.75	68.75	871.5	956.5	656.5	289.5	749.75	486.5	268	319.75	67.5	68.25
2014	S2	3190	3190	Control	4	NA	0	37	0	0	NA	1	0	1	F	36	Negative	2/11/2012	NA	0	1	1	2752	864.25	717.5	1561	464	2328.5	60.75	11613.5	86.25	2961.25	3780.5	1333.5	901.25	508	211.5	168	348.5	80.5	62
2014	S2	3190	3190	Control	4	NA	0	36.5	0	0	NA	1	0	1	F	5	Negative	2/11/2012	NA	0	1	1	3269	46	40.5	36	40.5	28.5	34	418	40.5	34	44	32.75	33	151.25	159.75	46.5	34	44	44.75
2014	S2	3190	3190	Control	4	NA	0	37	0	0	NA	1	1	1	M	57	Negative	2/11/2012	NA	0	1	1	3026	1897.75	52.25	66	389	2862	1200.25	4981.5	107.75	1234.5	2199.5	423	361	337.25	610.5	80.25	407.25	113	75.5
2014	S2	3190	3190	Control	4	NA	0	37	0	0	NA	1	0	1	F	45	Negative	2/11/2012	NA	0	3	1	2557	360.75	66	138	185	1167.25	901.75	1481	118	2590	3257.5	397	266.75	371.5	175	188.25	87	102	80.25
2014	S2	3190	3190	Control	4	NA	0	37	0	0	NA	1	0	1	F	20	Negative	2/11/2012	NA	0	1	1	3074	43.5	57	59.5	97.5	100	75	47.5	73	41.5	54.5	57.75	58.5	116.25	148	84	90	253.5	92.75
2014	S2	3190	3190	Control	4	NA	0	37	0	0	NA	1	0	1	M	18	Negative	2/11/2012	NA	0	1	1	3188	108.5	201.25	64	96.5	133.75	57.5	156	77.5	394.5	687	50	56	321	700	87	137.75	195.25	85
2014	S2	3190	3190	Control	4	NA	0	37	0	0	NA	1	0	1	F	50	Negative	2/11/2012	NA	0	1	1	3035	4167.5	591.75	5146.75	369.5	1037	608.5	8609	167.25	1947.5	1717.25	1283	843.5	480	272.25	109.5	535.5	321.25	118
2014	S2	3190	3190	Control	4	NA	0	37	0	0	NA	1	0	1	M	18	Negative	2/11/2012	NA	0	1	1	2998	332.5	58.25	121.5	215.25	151	48	377.5	67	1233.25	1636.25	51	134.25	231.25	256	101.5	1437.5	88.5	86.5
2014	S2	3190	3190	Control	1	NA	0	37	0	0	NA	1	1	1	M	57	Negative	2/11/2012	NA	0	3	0	2655	28	35	32	78	49.5	35.5	420	43.75	40	118	33	38	79.25	103.5	51	34.5	44	41
2014	S2	3190	3190	Control	4	NA	0	36.5	0	0	NA	1	0	1	F	7	Negative	2/11/2012	NA	0	1	1	3187	39	40	38.5	55.25	108	61	43.5	53	110	134.5	35.5	37.5	117.75	147	58.5	49.25	84.75	56.5
2014	S2	3190	3190	Control	4	NA	0	37	0	0	NA	0	0	1	F	80	Negative	2/11/2012	NA	0	3	1	2676	969	90.5	147	659.75	221	44	4960.25	74.5	299.75	869.5	375	259.5	135.5	412.75	79.5	123	84.25	74.5
2014	S2	3190	3190	Control	4	NA	0	37	0	0	NA	1	0	1	M	22	Negative	2/11/2012	NA	0	1	1	2899	224.5	74.75	52	149.75	2984.5	59.5	405.75	61.5	555.5	995.5	1381.25	129	250.5	129.5	99.5	166.75	64.75	61.5
2014	S2	3190	3190	Control	4	NA	0	37	0	0	NA	1	0	1	M	21	Negative	2/11/2012	NA	0	1	1	3191	96.5	444.5	123	842.25	247.25	34	1512.25	68.5	665.25	1363.75	79.5	47.5	70.5	80.5	48.25	91.25	47	44.5
2014	S2	3190	3190	Control	4	NA	0	36.5	0	0	NA	0	0	1	M	7	Negative	2/11/2012	NA	0	1	1	3667	47.5	64	69	116.75	135	94.5	53.25	83.5	47.5	60.5	68.5	70.25	133.5	181.5	92	107.5	306	113.75
2014	S2	3190	3190	Control	4	NA	0	37.5	0	0	NA	1	0	1	F	70	Negative	2/11/2012	NA	0	1	1	3385	44.5	59.5	60.5	102.5	113.5	80	49.5	75.25	43	55	59	62.75	119	157	82.75	93	267	98.5
2014	S2	3190	3190	Control	4	NA	0	37	0	0	NA	1	0	1	M	20	Negative	2/11/2012	NA	0	1	1	3449	155.75	85.5	35	344.5	103	40	201.5	70.25	1647.75	1983.5	117.25	40	209	94.5	56.5	44	47	44.5
2014	S2	3190	3190	Control	4	NA	0	37.1	0	0	NA	1	0	1	F	26	Negative	2/11/2012	NA	0	1	1	3239	239	50	772	158	1658.75	423.75	302.5	111.5	4267.25	3452.5	108.25	60.5	258	200.25	61.75	98	61	53.5
2014	S2	3190	3190	Control	4	NA	0	36.5	0	0	NA	0	0	1	F	5	Negative	2/11/2012	NA	0	1	1	3388	34.5	145	41.75	62.5	39.5	44	50.5	51.5	74.5	206	39	45.5	181	170	68.25	60	81.25	61.5
2014	S2	3190	3190	Control	4	NA	0	37	0	0	NA	1	0	1	F	40	Negative	2/11/2012	NA	0	1	1	3079	402.75	48	423.5	519	237.25	116	2583.5	102	1017	2184	534.5	122.25	223.5	93	97	608.25	200.5	307.5
2014	S2	3190	3190	Control	4	NA	0	37	0	0	NA	1	0	1	M	15	Negative	2/11/2012	NA	0	1	1	3138	570	79.25	123	463.25	1737	152.5	3639	61.25	702.25	1387.5	50.5	44.25	151	130.75	70	50.5	93.25	58.5
2014	S2	3190	3190	Control	4	NA	0	37	0	0	NA	1	0	1	M	47	Negative	2/11/2012	NA	0	1	1	3061	696.5	1324.5	129.25	396.5	90	55.25	2047.75	59.25	1714.5	2109.25	175	55.75	73.5	104.5	51.5	717.75	47	42.5
2014	S2	3190	3190	Control	4	NA	0	36.5	0	0	NA	1	0	1	M	7	Negative	2/11/2012	NA	0	3	0	2468	30.5	33	28.75	37	40.75	44	39.5	39.75	30.5	46.75	31	37	170.5	154.25	42.5	35.75	39.5	41
2014	S2	3190	3190	Control	4	NA	0	37	0	0	NA	1	0	1	M	20	Negative	2/11/2012	NA	0	2	1	2221	36.25	765.5	418.25	102	39	41.5	2075.75	68.5	1731	1672	40	45	131.75	187	65.75	65.25	72	57.5
2014	S2	3190	3190	Control	4	NA	0	36.5	0	0	NA	0	0	1	M	5	Negative	2/11/2012	NA	0	1	1	2591	29	38.5	37	45.5	31.5	36.5	34.5	46.25	30.75	56	32.25	36	51.5	65	56.5	39	49.5	51.25
2014	S2	3190	3190	Control	4	NA	0	37	0	0	NA	1	0	1	M	18	Negative	2/11/2012	NA	0	1	1	2448	38	49.25	49.25	613.5	58.5	56	121.25	72	41	356	57	58.25	225.75	236	69.25	80.5	66.5	66.5
2014	S2	3190	3190	Control	4	NA	1	37.5	0	0	NA	1	0	1	M	47	Negative	2/11/2012	NA	0	1	1	2591	550.25	37	36	54.25	64.5	34	297.75	45	34.5	127.5	58.75	85.5	85.5	163.25	50.5	126.75	40.5	43
2014	S2	3190	3190	Control	4	NA	1	36.5	0	0	NA	1	0	1	F	17	Negative	2/11/2012	NA	0	1	1	2650	52.5	56	55.5	74	51.25	51.25	78.25	81	58	92.25	45.5	63	114.5	202	84	78	91	102.5
2014	S2	3190	3190	Control	4	NA	0	36.5	0	0	NA	0	0	1	F	5	Negative	2/11/2012	NA	0	1	1	2601	29	39	38.75	49.5	32.5	38.75	31.5	44.75	43.5	35.5	34	34.5	81.25	80.5	52.25	39	52.5	50
2014	S2	3190	3190	Control	4	NA	0	37	0	0	NA	1	0	1	M	18	Negative	2/11/2012	NA	0	1	1	2514	254	116.25	448	116.25	661	57.25	394.5	122.75	2994.5	3053	70	70.5	141.75	225.5	96.5	322.5	88.25	106
2014	S2	3190	3190	Control	4	NA	0	36.5	0	0	NA	0	0	1	M	5	Negative	2/11/2012	NA	0	1	1	2882	32	41.5	41.5	74.5	35	45.25	36.5	51.25	52	56.5	35	61	61	73.5	58.5	43.5	73	54.5
2014	S2	3190	3190	Control	4	NA	0	37	0	0	NA	1	0	1	F	29	Negative	2/11/2012	NA	0	3	1	2548	NA	47	151.5	192	NA	58.25	NA	110.5	1252.25	NA	NA	NA	283.25	149.75	56.5	69.5	55.5	48.5
2014	S2	3190	3190	Control	4	NA	0	37	0	0	NA	1	0	1	M	11	Negative	2/11/2012	NA	0	1	1	2476	45	59.75	58	79.25	73.5	53.75	1650	72.75	112	162.5	43	45.75	183.5	220.75	80.5	67	74.5	71.5
2014	S2	3190	3190	Control	4	NA	0	36.5	0	0	NA	1	0	1	M	3	Negative	2/11/2012	NA	0	2	1	2311	27	35.75	37.25	42	196	108.25	31.25	39.75	30.5	40.5	32	30	80.25	104	53.5	34.5	42.5	42.5
2014	S2	3190	3190	Control	4	NA	0	37	0	0	NA	1	0	1	F	60	Negative	2/11/2012	NA	0	3	1	2286	1036.25	69.5	245.5	1711	4630	51.25	14577.5	145.5	19892.75	22834	2281	988.5	683	1474.5	1005	1659.25	79.75	71.5
2014	S2	3190	3190	Control	4	NA	0	37	0	0	NA	1	0	1	M	11	Negative	2/11/2012	NA	0	1	1	2612	33.5	44	43.5	71.25	65.5	42	158.5	58.25	43	63.5	35	39	85.5	321	63.25	53.75	62.25	65
2014	S2	3190	3190	Control	4	NA	0	37	0	0	NA	0	0	1	F	19	Negative	2/11/2012	NA	0	1	1	2307	102	61.5	61.5	84.25	1191.5	55.25	762	78.25	224.75	582.25	590.25	70.5	145.5	138.25	88	877.5	86	89.75
2014	S2	3190	3190	Control	1	NA	0	37	0	0	NA	0	0	1	F	55	Negative	2/11/2012	NA	0	2	1	2248	154	39	50.5	47.5	37	46.5	35.5	46.25	197.75	43.5	35.5	40	75	92.5	81	41.5	51.5	48.75
2014	S2	3190	3190	Control	1	NA	0	37	0	0	NA	1	0	1	M	25	Negative	2/11/2012	NA	0	1	1	2468	39.25	41	37.5	50.5	50.5	44.5	35.5	45	45.25	39.5	39.5	38.75	86.5	113	58.75	47.5	67	54.5
2014	S2	3192	3192	Intervention	3	NA	0	36.3	1	NA	NA	1	0	1	F	26	Negative	4/11/2012	NA	0	1	1	2067	695.75	59.25	70.5	1317.25	148.75	77.5	897.25	129	1281.5	6971	349.5	275	351.75	400.75	89.75	540	77	84.5
2014	S2	3192	3192	Intervention	3	NA	0	36.7	1	NA	NA	1	0	1	M	56	Negative	4/11/2012	NA	0	1	1	2028	652.75	424	45	319.75	159	41	7029.75	125.75	1424	1735.5	689	142.25	538.5	386.75	98.25	201.5	83.25	52.5
2014	S2	3192	3192	Intervention	3	NA	0	36.9	1	NA	NA	0	0	1	F	16	Negative	4/11/2012	NA	0	1	1	2483	54.5	55.75	54	122.5	83.75	53	67.75	72	203	314.75	55.5	56.75	163.5	177.5	83.5	83	139	85.25
2014	S2	3192	3192	Intervention	3	NA	0	36.8	1	NA	NA	1	0	1	F	15	Negative	4/11/2012	NA	0	1	1	2544	41	69	151.5	84	55.5	53	85	93.25	50	183.25	44.5	48	105.25	136.75	89	66	105.75	81.25
2014	S2	3192	3192	Intervention	3	NA	0	36.3	1	NA	NA	1	0	1	F	8	Negative	4/11/2012	NA	0	1	1	2495	30	40	40	46	33	39	32	48.75	34	36	38.25	35.5	143.75	124.25	57	43	44.75	53.75
2014	S2	3192	3192	Intervention	3	NA	0	36.1	1	NA	NA	1	0	1	F	36	Negative	4/11/2012	NA	0	2	1	2505	2978	65.75	281	720.5	445	81.5	2973	125.75	6806.5	9892	1384.75	1100.5	516.25	245	84.75	504.25	93.5	73.5
2014	S2	3192	3192	Intervention	3	NA	1	37.1	1	NA	NA	1	0	1	F	64	Negative	4/11/2012	NA	0	1	1	2161	794.75	141.25	164.5	144.5	302	74	5852	103	1328	2105	377.75	226	587.25	453	101.75	172.75	97.5	82
2014	S2	3192	3192	Intervention	3	NA	1	37.4	1	NA	NA	1	0	1	F	63	Negative	4/11/2012	NA	0	1	1	2655	436	464.25	72.5	131	2004.25	106.25	161	115.25	403	1638.75	360.5	187	478.5	184.25	107.25	486	138	112.5
2014	S2	3192	3192	Intervention	1	NA	0	36.9	1	NA	NA	1	0	1	F	36	Negative	4/11/2012	NA	0	1	1	2923	38.5	58.25	60.25	77	39	50.25	70.75	76.25	39.5	74.5	46	47	119.75	237.25	82	71	118.5	74.75
2014	S2	3192	3192	Intervention	3	NA	0	36.4	1	NA	NA	0	0	1	M	13	Negative	4/11/2012	NA	0	1	1	2423	149	50.75	598	99.25	49	66	641	63.5	244.5	1392.5	44.25	67	317.75	395.5	67.5	905.5	85	68.75
2014	S2	3192	3192	Intervention	3	NA	0	36	1	NA	NA	0	0	1	F	8	Negative	4/11/2012	NA	0	1	1	2486	31.5	34.75	61.75	54	767.25	39.5	64.5	58	67.5	149.5	34.25	34.75	739	618.25	51	40	42.5	49
2014	S2	3192	3192	Intervention	3	NA	0	36.4	0	1	NA	0	0	1	F	63	Negative	4/11/2012	NA	0	1	1	2294	544.5	63.5	824	422.5	9881	2385	8111.75	169.25	715.5	2097.5	569.5	333	550	524	127	349.75	172.25	84
2014	S2	3192	3192	Intervention	3	NA	0	36.1	1	NA	NA	0	0	1	M	34	Negative	4/11/2012	NA	0	1	1	2454	1977	52.75	1020.5	77.75	1260	416	1100.75	59	630	1030.5	356.5	130.5	308.25	207.75	73.25	339.25	46.25	43.5
2014	S2	3192	3192	Intervention	3	NA	0	36.3	1	NA	NA	0	0	1	F	30	Negative	4/11/2012	NA	0	1	1	2279	307.75	211.75	178.5	1731	1157.25	85	3897.75	102.25	2569	3951.5	191.5	79.75	1857.5	1556	410.25	74.5	79.5	86
2014	S2	3192	3192	Intervention	3	NA	0	36.4	1	NA	NA	1	1	1	M	24	Positive	4/11/2012	Pm	1	1	1	2650	1082.25	60	101	190.5	2505.25	53.75	1280.5	191.5	1072.75	3564.5	121	251.25	123.5	171	89.5	967.5	71.5	83.5
2014	S2	3192	3192	Intervention	3	NA	0	36.5	1	NA	NA	0	1	1	M	18	Negative	4/11/2012	NA	0	1	1	2429	220.75	48	14548.5	135.5	3046.75	172	136.5	93	449	1119.25	40	69	116	335	337.5	828.75	56	59.5
2014	S2	3192	3192	Intervention	3	NA	0	36.3	1	NA	NA	0	0	1	F	28	Negative	4/11/2012	NA	0	1	1	2530	721.25	98.75	259.5	100	172.25	171.75	946	169	610.25	904	126.5	165.75	220.75	212.5	107	241.5	112	99.5
2014	S2	3192	3192	Intervention	3	NA	0	36.3	0	1	NA	0	1	1	M	26	Negative	4/11/2012	NA	0	1	1	2495	208.25	49	91.5	753	173.25	151	402	60.75	300	804	44.5	43	174	115	66	87	65.75	64
2014	S2	3192	3192	Intervention	3	NA	0	37	1	NA	NA	1	0	1	F	34	Negative	4/11/2012	NA	0	1	1	2374	666.5	351.5	217	1135	5506.5	259.5	1909.25	310	945.5	3442.5	228	168	228	1778.25	83.5	594.75	72	61.75
2014	S2	3192	3192	Intervention	3	NA	0	36.3	1	NA	NA	1	0	1	M	2	Negative	4/11/2012	NA	0	1	1	3063	26	34.5	33.5	319.25	44.5	78.5	32	41.5	24.5	38.5	29.5	30	52	71.5	47.75	38.5	48	41.5
2014	S2	3192	3192	Intervention	3	NA	0	36.7	0	1	NA	1	1	1	M	36	Negative	4/11/2012	NA	0	3	1	3288	191.5	29	247.25	43.5	83.25	44.75	5070.25	30.5	158	327.5	187	88	79	71	38.5	898.75	29.5	35
2014	S2	3192	3192	Intervention	3	NA	0	36.3	1	NA	NA	0	0	1	F	24	Negative	4/11/2012	NA	0	3	1	3380	59	70.75	227	119	505	50	498.5	74.5	485.5	650.5	65.25	59.25	100	149.5	81.5	110.25	94.75	72
2014	S2	3192	3192	Intervention	3	NA	0	37	1	NA	NA	0	0	1	M	25	Negative	4/11/2012	NA	0	1	1	2519	862.25	74.5	129	89	4181.75	502.5	2723.25	127.5	2074.75	3273.5	652.5	112.5	149.5	209.25	89	626	95	79
2014	S2	3192	3192	Intervention	3	NA	0	36.1	1	NA	NA	0	0	1	M	6	Negative	4/11/2012	NA	0	1	1	2696	31.25	40	40	52.5	46	42	41.75	51.75	46.5	69	39	40	404.25	361.75	63.75	45	52	58.5
2014	S2	3192	3192	Intervention	3	NA	0	36.3	0	1	NA	0	1	1	M	23	Negative	4/11/2012	NA	0	1	1	2350	238	4985	564.25	271.75	1190.75	393	20791.5	177.75	5135	13170.75	51	48.75	150.25	237.75	77.25	70	75	72.75
2014	S2	3192	3192	Intervention	3	NA	0	36.4	1	0	NA	1	0	1	F	27	Negative	4/11/2012	NA	0	1	1	2537	1730	50.5	2213.75	129	7863	106	6211.75	168	921.5	1255.25	1288.5	525	585.5	181.25	72.5	3002.5	85.25	65.5
2014	S2	3192	3192	Intervention	3	NA	0	36.5	1	NA	NA	0	0	1	F	36	Negative	4/11/2012	NA	0	1	1	2324	1142.75	111.75	154.25	268.5	1569.5	80	2867.5	71.25	632.5	850.75	1064.75	386.75	668.75	795.75	70.5	103	63.5	65
2014	S2	3192	3192	Intervention	3	NA	0	36.8	0	1	NA	1	0	1	M	29	Negative	4/11/2012	NA	0	1	1	2275	2668.25	63.5	93	2100.25	72.5	43.5	5037.75	76.5	672.5	826.25	71	132.25	219.5	287	557.25	1075.5	78.75	71.5
2014	S2	3192	3192	Intervention	3	NA	0	36.9	1	NA	NA	1	1	1	M	34	Negative	4/11/2012	NA	0	1	1	2620	1168.25	53.5	109.5	362	1049.75	43	1657.5	60.5	143.5	1409	320	127	238.5	418.5	71.75	238.25	60.5	59.5
2014	S2	3192	3192	Intervention	3	NA	0	36.3	1	NA	NA	1	1	1	M	16	Negative	4/11/2012	NA	0	1	1	2458	448.75	74.25	951.5	226.25	7728	2665.5	2324.5	147.5	1445	2423	63.25	64	125.5	178.75	98.5	184.5	92.5	91
2014	S2	3192	3192	Intervention	3	NA	0	36.3	1	NA	NA	0	0	1	F	8	Negative	4/11/2012	NA	0	1	1	2654	39.5	40.5	57.5	57.5	125.5	58.75	57	50.25	44.75	74	40	38.25	83	244.75	59.5	47	52	56
2014	S2	3192	3192	Intervention	1	NA	0	36.5	1	NA	NA	0	0	1	M	20	Negative	4/11/2012	NA	0	1	1	2609	26	44.5	35.5	55	147.75	123	394.25	44	33.5	56.5	32	34.5	66.5	115.75	51.25	32.75	42.75	41
2014	S2	3192	3192	Intervention	1	NA	0	36.4	0	0	NA	0	0	1	F	20	Negative	4/11/2012	NA	0	1	1	2629	28.5	42.5	41.25	64.5	43.5	53	192.5	66.75	50.25	45.5	33.75	38.75	64.25	98.75	65.5	44.5	88	60.5
2014	S2	3192	3192	Intervention	1	NA	0	36.7	0	0	NA	0	0	1	F	52	Negative	4/11/2012	NA	0	1	1	2745	36	48.75	55.5	69.5	64.5	60	37.5	68	41	38.25	44.25	48	236.75	677.25	93.25	56	72.5	63.5
2014	S2	3194	3194	Intervention	3	NA	0	36.9	0	1	NA	0	0	1	M	12	Negative	2/11/2012	NA	0	1	1	2610	145.5	51.5	94.5	66	1090.5	843	63	62.5	439	1303.25	39	250	136.25	216.5	68.5	3403.5	66.75	58.5
2014	S2	3194	3194	Intervention	3	NA	1	36.1	1	NA	NA	0	0	1	F	19	Negative	2/11/2012	NA	0	1	1	2659	39.5	68	737.75	274.25	56.5	39.5	230	73.75	69	281	74.5	56.75	299.5	204.5	62.75	79	56	57.75
2014	S2	3194	3194	Intervention	3	NA	0	36.6	0	0	NA	0	0	1	M	5	Negative	2/11/2012	NA	0	3	1	3111	31	40.5	39.5	49	32.5	40	39	48.5	32.5	39.5	36.25	36	107	115.5	56.5	44	69	51.5
2014	S2	3194	3194	Intervention	3	NA	1	36.4	1	NA	NA	0	0	1	F	37	Negative	2/11/2012	NA	0	1	1	2297	1152	75.5	80.25	113.5	1046.25	156	5273.5	252.75	3420.5	5110	758	565.75	1048.5	1171.5	92	1012	89.5	82.5
2014	S2	3194	3194	Intervention	3	NA	0	36.5	0	1	NA	1	0	1	M	2	Negative	2/11/2012	NA	0	1	1	2658	37.5	37.75	41	49	34.5	35	58.5	57.75	62.25	101.75	36	35	59.75	81	58.75	48	62	50.75
2014	S2	3194	3194	Intervention	3	NA	0	36.8	0	0	NA	0	0	1	M	4	Negative	2/11/2012	NA	0	1	1	2535	30	38.5	39.25	66.5	58.75	35	146.5	48.75	74.5	78.75	34.5	37.25	110	155.5	65.5	42	46.75	48
2014	S2	3194	3194	Intervention	3	NA	0	36.7	0	0	NA	1	0	1	M	6	Negative	2/11/2012	NA	0	1	1	2697	31.5	45	41	54.5	33	40.5	36.5	62.75	651	39.5	34.5	39.5	95.75	92.25	61.5	43.5	58.5	56.25
2014	S2	3194	3194	Intervention	3	NA	1	36.4	0	0	NA	1	0	1	M	7	Negative	2/11/2012	NA	0	2	1	2729	29.5	44	46.5	53.5	32.75	42.5	34.5	59	36.5	46	39.5	43	144.25	165.5	92.5	53	65	59.5
2014	S2	3194	3194	Intervention	3	NA	1	36.9	0	0	NA	1	1	1	M	47	Negative	2/11/2012	NA	0	1	1	2617	881.5	106.75	52.75	74.5	5205.25	77.25	2006.5	74.25	675.5	1129.75	195.25	117.75	133.75	133	75.25	125.5	84.25	65.5
2014	S2	3194	3194	Intervention	3	41.26	0	36.4	0	1	NA	0	0	1	F	7	Positive	2/11/2012	Pv	1	1	1	1969	40	47.5	54	80.75	134	49.5	144	67	53.5	752	46.5	46.5	175.75	341.75	155.25	87.75	119	75.5
2014	S2	3194	3194	Intervention	3	NA	1	36.1	0	0	NA	0	0	1	M	58	Negative	2/11/2012	NA	0	1	1	2340	976.5	72.5	54.5	109.5	320.5	48	530.25	69	554.5	718.5	412	266.75	319.75	402.75	68.75	318	74.75	61.5
2014	S2	3194	3194	Intervention	3	NA	1	36.4	1	NA	NA	1	0	1	M	11	Negative	2/11/2012	NA	0	1	1	2818	33	49	47.25	59.25	102.5	60.5	156.5	63	1293.5	265	35.75	46	90	119.75	78	50	86	61
2014	S2	3194	3194	Intervention	3	NA	0	36.7	0	1	NA	0	0	3	F	16	Negative	2/11/2012	NA	0	1	1	1980	73.5	156.5	802	106	368.5	206	387	69	2632	4403	43	56	194.5	189.75	72.5	109.5	79.5	68.75
2014	S2	3194	3194	Intervention	3	NA	1	36	1	NA	NA	0	0	1	F	6	Negative	2/11/2012	NA	0	3	1	2264	28	37	43	48.5	31	34.5	141	54	34.5	53	32.5	48	191.5	104	53.5	46	64.75	72.5
2014	S2	3194	3194	Intervention	3	NA	1	36.3	1	NA	NA	0	0	1	M	2	Negative	2/11/2012	NA	0	1	1	2774	30.5	41.75	44.5	57.75	53	43.75	35.5	56.5	36	46.25	37.25	37	81.25	84.25	65.25	45.5	69.5	60.5
2014	S2	3194	3194	Intervention	3	NA	1	36.5	1	NA	NA	0	0	1	F	20	Negative	2/11/2012	NA	0	1	1	2368	1197.25	1338.75	527.25	201.75	3090.5	71.75	16370.5	113	10109.5	10169.5	246	126.5	204.75	322.75	90.25	744	98	136.5
2014	S2	3194	3194	Intervention	3	NA	0	37.2	0	0	NA	1	0	1	M	70	Negative	2/11/2012	NA	0	1	1	2151	1926.25	389	175.5	343	508	80	16685.5	89.75	527.25	1979.25	865.25	413.5	339.25	247.25	564.5	361.5	109.5	70
2014	S2	3194	3194	Intervention	3	NA	0	36.7	0	0	NA	1	0	1	F	6	Negative	2/11/2012	NA	0	1	1	2460	29.5	74.25	39.75	74.5	588.75	41.75	165.25	49	137.25	104.25	33.5	39	120	103.25	52.5	42	54.75	48.25
2014	S2	3194	3194	Intervention	3	NA	1	36	1	NA	NA	1	1	1	M	27	Negative	2/11/2012	NA	0	1	1	2247	169.25	64.75	374.75	691.75	307.25	79.5	3453	89.5	567	1596.75	68	54	331	497.75	112.5	914.5	71	83
2014	S2	3194	3194	Intervention	3	NA	1	36.1	1	NA	NA	1	1	1	F	30	Negative	2/11/2012	NA	0	1	1	2236	409	58.5	1657.25	636.5	3020.5	670.75	1886.5	69.75	539	545.75	896	389.5	241.75	345	78.75	179.75	69.75	71.75
2014	S2	3194	3194	Intervention	3	NA	1	36.2	1	NA	NA	0	0	1	F	6	Negative	2/11/2012	NA	0	1	1	2898	27.5	33.5	46	48	57	40.5	60	38.5	38.5	60	35	39	929.75	431	47	38.5	42.5	43
2014	S2	3194	3194	Intervention	3	NA	1	37.1	1	NA	NA	0	0	1	M	19	Negative	2/11/2012	NA	0	1	1	2665	56	95	40.25	80.5	1196.5	565.25	793.5	55.5	128.5	268.5	61	88	195	177	59.25	296.25	55.25	56.75
2014	S2	3194	3194	Intervention	3	NA	1	36.3	1	NA	NA	0	0	1	F	32	Negative	2/11/2012	NA	0	1	1	2570	2399.5	59.25	886	252.25	188.5	55.25	6580	200.5	5654.75	5470	1493	1574.75	728.75	190.5	95.25	258.75	110	83.75
2014	S2	3194	3194	Intervention	3	NA	0	36.5	0	0	NA	0	0	1	F	15	Negative	2/11/2012	NA	0	1	1	2756	49	256.5	244.25	111.5	45.5	47.25	184.75	82.5	1001.75	1096	43	52	88	113.5	70	73	64.25	68
2014	S2	3194	3194	Intervention	3	NA	1	37.2	1	NA	NA	1	0	1	F	5	Negative	2/11/2012	NA	0	1	1	2661	46	50	54.5	61.75	47	48.5	63	66	85	132.25	47	44.5	94.25	129.25	60.75	52	78.25	56
2014	S2	3194	3194	Intervention	3	41.52	1	36.8	1	NA	NA	1	0	1	M	26	Positive	2/11/2012	Pf	1	1	1	2522	539	132.75	213.5	191	698	68.75	20007.75	202	10153	12631	1085.5	143.75	509.25	445	143.75	104.75	91.75	135
2014	S2	3194	3194	Intervention	3	NA	1	36.3	1	NA	NA	1	0	1	F	3	Negative	2/11/2012	NA	0	2	1	2373	29.5	39.75	40.5	49	70	57	113.75	50.5	68.5	85.25	36.25	34	108.25	110.75	58.25	42.75	54.75	49.5
2014	S2	3194	3194	Intervention	3	NA	0	37.5	0	1	NA	1	1	1	M	25	Negative	2/11/2012	NA	0	1	1	2522	6456.75	115	681.75	76.5	157	40.75	5391.25	63.25	1327.5	1165	35.5	38.5	121.5	93	61.5	223	56	54
2014	S2	3194	3194	Intervention	3	NA	0	36.4	0	0	NA	1	0	1	M	8	Negative	2/11/2012	NA	0	1	1	2327	42	50.5	57	71	42	48.75	230.5	84.5	129	226.75	46.75	49.5	253.25	238.75	108.5	103	74	67
2014	S2	3194	3194	Intervention	3	NA	0	36.2	0	0	NA	1	0	1	M	6	Negative	2/11/2012	NA	0	1	1	2638	36.5	50.25	47	106.5	52.5	273.5	1365.75	64	154.5	105.25	45.5	47.5	148.5	162.5	77.5	73	84.5	77.75
2014	S2	3194	3194	Intervention	3	NA	1	37.5	0	0	NA	1	0	1	F	25	Negative	2/11/2012	NA	0	1	1	2492	710.25	203.25	202	125.75	231	221.75	108.5	117.75	654.75	784.5	306.5	296	158.5	180.25	76.5	144.75	69.25	68.5
2014	S2	3194	3194	Intervention	3	NA	0	36.5	0	1	NA	1	0	1	F	45	Negative	2/11/2012	NA	0	1	1	2605	546	75.5	177	110.75	392	646.5	1378.75	180	378.5	462.25	139.25	489	186.75	153.75	92.25	90	102.25	80.5
2014	S2	3194	3194	Intervention	3	NA	0	36.8	0	0	NA	1	0	1	M	8	Negative	2/11/2012	NA	0	2	1	2577	39.5	86.25	52.5	420	3114.75	90.5	13595.25	78	797.5	302.5	37.75	46	169.5	1627.75	63.75	46.5	61.25	63.75
2014	S2	3194	3194	Intervention	3	NA	0	37.2	0	1	NA	1	0	1	M	73	Negative	2/11/2012	NA	0	1	1	2826	1247	51.5	813.25	247	404.5	57.5	4029	100	1516	4869.75	317	490.25	318.5	206	73.75	70.75	62	58.25
2014	S2	3194	3194	Intervention	3	NA	0	37.1	0	1	NA	1	0	1	F	68	Negative	2/11/2012	NA	0	1	1	2825	1349	182.5	1632.75	523.5	621.25	45	3442.25	150.5	1174.5	3548.5	472.25	1120.5	1087.5	5884.75	122.5	381.75	70	61.5
2014	S2	3194	3194	Intervention	3	NA	0	36.5	0	0	NA	0	0	1	M	10	Negative	2/11/2012	NA	0	1	1	2889	63.5	440	82	300.5	188	45	6486.5	89.5	512.5	1130.5	50.25	74	211.75	345.75	82.25	62.5	68.25	87
2014	S2	3194	3194	Intervention	3	NA	0	36.9	0	0	NA	0	0	1	M	7	Negative	2/11/2012	NA	0	2	1	3493	81.75	108.5	137.5	421.75	66	89.5	66.5	199.5	82.5	76	68	74.5	316	472.75	212	188.5	251	255
2014	S2	3194	3194	Intervention	3	NA	0	36.7	0	0	NA	1	0	1	M	26	Negative	2/11/2012	NA	0	1	1	3446	343.5	235.25	288	426.75	1965.5	292	1725.25	188.5	1036	2919	232	102.75	443	451	284	510	229.5	234.5
2014	S2	3197	3197	Control	3	NA	1	36.8	0	0	NA	1	1	1	M	56	Negative	5/11/2012	NA	0	3	1	2492	780.5	42	92	192	284.25	67.25	1278	67.5	1650	1720.75	262.25	206.25	283	198	63	194.5	56.75	49.75
2014	S2	3197	3197	Control	3	NA	0	35.6	0	0	NA	1	0	1	M	4	Negative	5/11/2012	NA	0	1	1	3589	56.25	66.75	72	242.75	98.5	82.5	68	142.25	64.25	155	55.75	67	353.5	364.25	152.5	130.5	179.75	137.5
2014	S2	3197	3197	Control	3	NA	1	37.4	0	0	NA	1	0	1	M	15	Negative	5/11/2012	NA	0	1	1	3655	39	58.25	1022.5	218.25	2468.75	42	54	81.5	65.75	102.25	40.5	47	113.75	161	91.75	79.5	126	106.5
2014	S2	3197	3197	Control	3	NA	0	36.9	0	0	NA	1	0	1	M	9	Negative	5/11/2012	NA	0	1	1	3456	146.5	286	603.5	1055.5	280	177.5	278.5	867	182	468.5	113	131.5	757	838	827	561.5	866	866
2014	S2	3197	3197	Control	3	NA	0	36.1	0	0	NA	1	0	1	F	14	Negative	5/11/2012	NA	0	1	1	3161	90	177.5	141	462.5	133	77.25	373.75	265.25	114	198	61.5	85	209.5	353.75	187.25	384	252.5	210
2014	S2	3197	3197	Control	3	NA	1	36.7	0	0	NA	1	0	1	M	25	Negative	5/11/2012	NA	0	1	1	3428	245.5	280.75	226.25	769	317	125.5	146.75	546.5	1798.5	2367.5	291.5	107.5	453.75	2602	1520.5	928.5	376.5	374.25
2014	S2	3197	3197	Control	3	NA	0	35.9	0	0	NA	1	0	1	M	7	Negative	5/11/2012	NA	0	1	1	3750	51.5	68.5	85.5	239	46.5	57.75	862.5	146	85	109.25	51.5	54.25	162.25	221.5	136	111	171.5	139.25
2014	S2	3197	3197	Control	3	NA	0	36.2	0	0	NA	0	0	1	F	12	Negative	5/11/2012	NA	0	1	1	3087	57.5	87.25	93.5	302	239.25	114	181.25	218	93	88	77.25	75.5	285	346.25	151	153.5	187.5	164
2014	S2	3197	3197	Control	3	NA	0	35.4	0	0	NA	1	0	1	F	13	Negative	5/11/2012	NA	0	1	1	2850	150.5	1014.75	4372.5	429.5	384.5	70	2737.75	182	5061.75	7184.5	62	64.75	232	347	144	260	185.5	164.5
2014	S2	3197	3197	Control	3	NA	0	36.6	0	0	NA	1	0	1	F	30	Negative	5/11/2012	NA	0	1	1	3032	48	69.25	113.25	240.75	47	57	55	114	94	343	44.5	52.5	160.75	239.25	126.75	114	174	146.25
2014	S2	3197	3197	Control	3	NA	0	36.1	0	0	NA	1	0	1	M	13	Negative	5/11/2012	NA	0	1	1	3415	43.25	57.5	58.25	186.5	36.5	51	41	83	46.5	47	44.5	290.5	212	216.75	98	97	124	102.5
2014	S2	3197	3197	Control	3	NA	0	36.5	0	0	NA	1	0	1	M	18	Negative	5/11/2012	NA	0	3	1	2668	305.25	50.5	56	401.75	38.5	35.5	605	84.25	1138	1263.25	79	41.5	76.5	2343.25	80	184	56.5	48.5
2014	S2	3197	3197	Control	3	NA	1	36.6	0	0	NA	0	0	1	M	11	Negative	5/11/2012	NA	0	1	1	3311	67.5	96.5	110.5	315	62.25	74.5	77.25	159.75	103	86	63	74	304.5	325.75	169.5	178	245.75	192.5
2014	S2	3197	3197	Control	3	NA	1	36.5	0	0	NA	0	0	1	M	7	Negative	5/11/2012	NA	0	1	1	2923	47	67.5	71	204.25	297.5	55	50	107.5	62.5	58	44.5	52.25	202.5	252	115	111	183.5	153.5
2014	S2	3197	3197	Control	3	NA	0	35.9	0	0	NA	0	0	1	M	13	Negative	5/11/2012	NA	0	3	1	3028	140	40.5	1076	144	5332	1353	784.5	216.5	715.25	1458	70.5	37.5	271	328	69.75	1801.5	53.5	49.5
2014	S2	3197	3197	Control	3	NA	1	36.3	0	0	NA	1	0	1	F	50	Negative	5/11/2012	NA	0	1	1	2896	2773	247.5	1255.5	940.75	1262.5	177.75	1787.5	374.5	9470.25	9302.5	2261.5	1057	1190.25	1055	1146.5	1531.5	479.75	479.5
2014	S2	3197	3197	Control	3	NA	1	36.4	0	0	NA	1	0	1	M	18	Negative	5/11/2012	NA	0	1	1	3247	97.5	102.75	726.5	367.75	710	86	393.25	242	920	1041	64.75	76.5	417.75	1180.5	198	1052.25	251	223
2014	S2	3197	3197	Control	3	NA	0	36.2	0	0	NA	0	0	1	M	11	Negative	5/11/2012	NA	0	1	1	3051	67.75	94.5	111	383.25	75.5	85.75	474.5	178	80.5	73.75	66.75	76	214	353	184	221	246.75	204.75
2014	S2	3197	3197	Control	3	NA	1	36.8	0	0	NA	1	1	1	M	25	Negative	5/11/2012	NA	0	1	1	2893	242	221.5	2689.5	495.75	146.25	85.5	14505	229	1896.25	2635.75	69.5	335	323.5	3232.5	2302	335	250	224.5
2014	S2	3197	3197	Control	3	NA	1	36.2	0	0	NA	1	0	1	M	7	Negative	5/11/2012	NA	0	1	1	3178	64.75	91	103.5	368.5	73	76	76.75	189.25	85.25	109	61.5	68.5	212.25	317.75	166.75	164.5	225	210
2014	S2	3197	3197	Control	3	NA	0	35.9	0	0	NA	1	0	1	F	3	Negative	5/11/2012	NA	0	2	1	3234	46	67.5	71.25	210	46.75	64	42.5	97	47	46.5	43.5	51.5	143	231	114	93	139	135
2014	S2	3197	3197	Control	3	NA	1	34.8	0	0	NA	1	0	1	F	30	Negative	5/11/2012	NA	0	1	1	2905	230.5	233.5	12051	947	336.25	176.25	15707.25	500.5	619.25	19406.25	116	199.25	520.5	933.25	440	873	498.5	506.75
2014	S2	3197	3197	Control	3	NA	1	36.4	0	0	NA	1	0	1	F	4	Negative	5/11/2012	NA	0	1	1	3280	54.5	89	136.75	250.25	274.5	106	114.5	137.5	60	113	51.25	61.25	264.5	418.25	137.5	135	172.25	160
2014	S2	3197	3197	Control	3	NA	1	36.4	0	0	NA	1	0	1	M	16	Negative	5/11/2012	NA	0	3	0	3132	47.5	55.25	66.25	1420.25	376.75	45.5	13757.75	78.5	673.25	1362	41	39	186.75	396.25	72.5	191	70	65.5
2014	S2	3197	3197	Control	3	NA	0	35.1	0	0	NA	1	0	1	F	18	Negative	5/11/2012	NA	0	1	1	2986	1622.25	144.25	2307.75	634.75	2482.5	119	2822.75	338	1268.5	1325.5	818.5	115	504	1040.25	282	715.5	412.5	343.5
2014	S2	3197	3197	Control	3	44.1	1	37.1	0	0	NA	1	0	1	F	15	Positive	5/11/2012	Pf	1	1	0	3262	296.5	187	255	1080	148.25	139	1903.25	361.75	199.75	229	137	353.25	614.25	736	364.25	803.75	465.5	447
2014	S2	3197	3197	Control	3	NA	0	36.2	0	0	NA	1	0	1	F	40	Negative	5/11/2012	NA	0	2	1	3108	344	137	163.5	760.75	1071.5	110.5	116	234.25	726.5	1678.5	1002.25	280.75	629.25	620.5	318	1114	307.5	279
2014	S2	3197	3197	Control	3	NA	1	35.9	0	0	NA	1	0	1	M	6	Negative	5/11/2012	NA	0	1	1	3398	763	69.5	86	288.5	53	87.5	86	122.5	60.75	58.25	52.75	61	176.75	290.5	145.75	135.5	179.75	158.5
2014	S2	3197	3197	Control	3	NA	0	36.5	0	0	NA	1	0	1	M	18	Negative	5/11/2012	NA	0	1	1	3098	735.5	302.5	899.25	720.5	311.75	294.5	2333.25	255.5	102.75	576.75	83.75	143.25	324.25	955.75	258.25	1382.75	320.25	325.5
2014	S2	3197	3197	Control	3	NA	1	36.7	0	0	NA	1	0	1	M	6	Negative	5/11/2012	NA	0	1	1	3343	72	105.5	149.75	624.5	216.25	87	1051.5	259.5	759	1204.25	67.5	90	223.75	531.75	259.75	194	257	236
2014	S2	3197	3197	Control	3	NA	1	37.3	0	0	NA	1	0	1	F	45	Negative	5/11/2012	NA	0	1	1	3310	2598	140	1115	634.75	71.75	74	1880.75	208	2390.25	3282	169.5	116.25	301.75	652	172.75	1463.25	223.5	224.75
2014	S2	3197	3197	Control	3	NA	0	35.8	0	0	NA	0	0	1	F	18	Negative	5/11/2012	NA	0	1	1	2914	86.5	235.75	160.75	1043	221	92.75	NA	243	1131	NA	77.75	109.5	534.25	649.5	237	395	329.25	290.25
2014	S2	3197	3197	Control	3	NA	0	35.9	0	0	NA	1	0	1	F	28	Negative	5/11/2012	NA	0	1	1	3192	846.5	80	59	392.5	1480.25	46.75	394	102.25	170.75	1087.5	212.25	90.25	154.25	3228.25	100.5	98	127.5	99
2014	S2	3197	3197	Control	3	NA	1	36.3	0	0	NA	1	0	1	M	24	Negative	5/11/2012	NA	0	1	1	3156	367	372.5	2373.25	667.5	379.5	218.5	3555.5	376	1313.25	1528	263.25	154.25	459	594.75	250.25	475.25	337.25	290.5
2014	S2	3197	3197	Control	3	NA	1	36.2	0	0	NA	1	0	1	M	20	Negative	5/11/2012	NA	0	1	1	3002	414.5	252.5	148.25	543.25	915.5	91	362.25	276.25	147.5	190.75	262	98.5	379	453.5	218.75	671	306	273.75
2014	S2	3197	3197	Control	3	39.8	1	36.2	0	0	NA	0	0	1	F	11	Positive	5/11/2012	Pv	1	2	1	3219	70.25	94.25	114.75	364.75	355.5	878.75	425	191.75	80.5	77.25	57.5	68.5	363.25	458	195.5	246.5	245.75	237.25
2014	S2	3197	3197	Control	3	NA	0	35.4	0	0	NA	1	0	1	M	8	Negative	5/11/2012	NA	0	1	1	3605	71	92	145	454.5	300	88.5	105.5	189.5	270.25	174	61.25	74	230.25	431	202.5	164.75	242.25	191
2014	S2	3197	3197	Control	3	NA	1	36.8	0	0	NA	1	0	1	F	60	Negative	5/11/2012	NA	0	2	1	2788	1974.25	287.25	1410.75	2095.75	5878	157	NA	438	4335	6902.5	1475.5	1285	1337	2469.75	602.25	1100	315.5	341.75
2014	S2	3197	3197	Control	3	NA	0	36.2	0	0	NA	0	0	1	M	47	Negative	5/11/2012	NA	0	1	1	3155	1839.25	506.5	215.25	1578.5	1018	114	7993.75	292.25	NA	NA	315	233.25	459.75	1034.75	211	248.5	277.75	279.25
2014	S2	3197	3197	Control	3	NA	1	36.8	0	0	NA	0	0	1	F	30	Negative	5/11/2012	NA	0	3	1	2930	840	47.5	79.5	75.5	504.25	37.75	252	47.25	372	677.5	227.75	140.75	146.5	177.25	77.25	9114.75	60.25	49
2014	S2	3197	3197	Control	1	NA	0	36.1	0	0	NA	0	0	1	M	12	Negative	5/11/2012	NA	0	1	1	3648	63	88.5	98.25	334	56.5	66.5	63	155.75	72.25	139.5	53.5	65	202.75	325.25	160.25	162	217	188
2014	S2	3197	3197	Control	1	NA	1	36.3	0	0	NA	0	0	1	F	24	Negative	5/11/2012	NA	0	1	1	3672	94.5	101.75	161.75	409.75	131.5	114	114	175	87	161.25	70	71.75	358.75	2890	194.25	187.25	257.5	236
2014	S2	3197	3197	Control	1	NA	1	36.2	0	0	NA	0	0	1	F	19	Negative	5/11/2012	NA	0	3	0	3249	52.25	43	50.5	60	121.5	93.5	42	56.75	55.25	79.5	92	58.5	182.25	152	66	70.25	67.5	68.75
2014	S2	3197	3197	Control	3	NA	0	35.9	0	0	NA	1	0	1	M	49	Negative	5/11/2012	NA	0	1	1	3101	362.5	133.5	5038.75	703	743.75	97.5	1140.75	199.75	977	1330.5	188.75	88	458.25	443.25	214	1190	308.25	312.75
2014	S2	3197	3197	Control	3	NA	0	36.1	0	0	NA	1	0	1	M	3	Negative	5/11/2012	NA	0	1	1	3148	69	96	150.75	363.5	353.25	86	78	228.75	168	368.25	59.5	73.75	351.5	495	195.5	198	235	256
2014	S2	3203	3203	Intervention	3	NA	1	36.9	1	NA	NA	0	0	1	M	38	Negative	1/11/2012	NA	0	1	1	3269	1160.25	146.25	581.5	1335.5	1801.75	907	13207.5	366	2276.25	2457.5	685	99.25	422	2229	266.5	1773	344.5	343
2014	S2	3203	3203	Intervention	3	NA	0	35.8	1	NA	NA	0	0	1	F	50	Negative	1/11/2012	NA	0	3	1	2401	1122	223.5	86.5	84.25	2550.5	44.5	3056.5	55.5	37.5	3860.5	1911.5	509.75	410	123	67.5	3904	51	51.25
2014	S2	3203	3203	Intervention	3	NA	0	35.9	1	NA	NA	0	0	1	F	4	Negative	1/11/2012	NA	0	3	1	2749	34	43	40.5	52	31	37	34.25	52.75	29	36.5	38	36.25	73	82	63	41.25	60.25	53
2014	S2	3203	3203	Intervention	3	NA	0	35.6	1	NA	NA	0	0	1	F	66	Negative	1/11/2012	NA	0	5	1	3098	407.75	2870	289	1738.5	127.5	126.5	7318	406.5	6413.25	6883.5	286.75	518.75	475	586	410.75	1664.75	352.25	402.5
2014	S2	3203	3203	Intervention	3	NA	0	35.7	1	NA	NA	0	0	1	F	4	Negative	1/11/2012	NA	0	3	0	2560	34.25	45	49.5	73.5	36.25	46.5	35	58	34.5	46	35.5	37.25	202.5	251.5	68.5	61	190.75	71.5
2014	S2	3203	3203	Intervention	3	NA	0	36.9	1	NA	NA	0	0	1	M	8	Negative	1/11/2012	NA	0	3	1	3167	46.5	43.75	44	114	52.5	54.25	96	60.5	229.5	66.75	41.5	53.75	110	139	417	70.5	63	66.25
2014	S2	3203	3203	Intervention	3	NA	1	36.5	1	NA	NA	0	0	1	M	39	Negative	1/11/2012	NA	0	5	0	3333	1363	263.5	870	930.5	1139.5	202	4814.75	812	2371.5	3307	772	596.5	910.25	1036	573.75	1510.25	547.25	644
2014	S2	3203	3203	Intervention	3	NA	1	36.2	1	NA	NA	0	0	1	F	28	Negative	1/11/2012	NA	0	1	1	2894	783	219.5	164.5	446.5	3155.5	121.5	1525.5	209.25	641	5160	6372	931.5	2930	414.75	159.75	197	206	186.25
2014	S2	3203	3203	Intervention	3	NA	0	36.3	1	NA	NA	0	0	1	F	7	Negative	1/11/2012	NA	0	3	1	2449	33.5	48.25	53.5	59	11135.25	1818.25	529.75	124.25	96.5	2255.75	34	47	410.75	381.75	63.25	43.5	56	54
2014	S2	3203	3203	Intervention	3	NA	1	36.6	0	1	NA	0	0	1	M	2	Negative	1/11/2012	NA	0	4	1	3275	27.5	35.5	33	42	31.5	32.5	34.75	40.5	27.5	31.5	34	32.5	71.75	75.5	49.75	35.5	45	49
2014	S2	3203	3203	Intervention	3	NA	0	36.3	1	NA	NA	0	0	3	M	13	Negative	1/11/2012	NA	0	1	1	3568	102.5	116.5	152.5	411.5	143.5	92.5	217.5	181.25	115.75	180.25	80.75	80.75	234.25	340.25	189.75	216	282.75	228
2014	S2	3203	3203	Intervention	3	NA	1	36.7	1	NA	NA	0	0	1	M	9	Negative	1/11/2012	NA	0	3	0	2619	37	60	49	62	61	50	43	61	61	67.75	36.25	41.75	102.5	112.5	72.25	56.5	98	66.25
2014	S2	3203	3203	Intervention	3	NA	1	36.3	1	NA	NA	0	0	1	F	6	Negative	1/11/2012	NA	0	1	1	3489	105.25	141.25	158.25	470	96	120	104.25	232	131	NA	87	99.5	254.5	404	233.5	251.75	335	294.75
2014	S2	3203	3203	Intervention	3	NA	0	36.1	1	NA	NA	0	1	1	M	20	Negative	1/11/2012	NA	0	3	1	2589	395.25	79	683.5	231.75	3991	38.5	206	48.5	549	912.5	397.25	92	123.5	102.5	55	166.5	54	47.5
2014	S2	3203	3203	Intervention	3	NA	0	36.6	1	NA	NA	0	0	1	F	12	Negative	1/11/2012	NA	0	3	1	3058	28	37.5	88.5	53.5	32	39	106.5	56.5	103	71.5	34	34.25	108.5	84.25	52.25	37.75	49.5	47.5
2014	S2	3203	3203	Intervention	3	NA	0	35.8	1	NA	NA	0	0	1	M	5	Negative	1/11/2012	NA	0	1	1	3153	61.5	75.5	78	248	48	55.5	49	121.25	58	61.25	60.75	76.25	150.75	233.25	130	136.5	160.25	150
2014	S2	3203	3203	Intervention	3	NA	0	36.2	1	NA	NA	0	0	1	F	4	Negative	1/11/2012	NA	0	3	0	3210	32	39.25	45.5	54.5	32.5	37.5	32.5	55.5	4220	48	34.5	36.5	64.25	79.5	66.5	42.5	73	57.25
2014	S2	3203	3203	Intervention	3	NA	0	36.1	1	NA	NA	0	1	1	M	22	Negative	1/11/2012	NA	0	3	0	2901	2770.75	365.75	773.5	120.5	9633.25	241.75	1605.5	77.75	3302.5	5742.25	248.75	209.5	276	407.5	127.5	137.25	62.75	59
2014	S2	3203	3203	Intervention	3	NA	0	35.9	1	NA	NA	0	0	1	M	4	Negative	1/11/2012	NA	0	3	1	3357	51	40	37	87.75	38	44.5	34	43.5	71.25	38.75	37.5	48	64	81	51.75	50	69.5	51
2014	S2	3203	3203	Intervention	3	NA	0	36.4	1	NA	NA	0	0	1	F	46	Negative	1/11/2012	NA	0	1	1	2957	NA	371	1470.25	9171.5	NA	NA	25055.5	1068.25	12561	30770.5	NA	653	2091.75	4972.25	786	1702.75	989.5	1100.75
2014	S2	3203	3203	Intervention	3	NA	0	36.3	1	NA	NA	0	0	1	M	9	Negative	1/11/2012	NA	0	3	1	3056	36	43.5	109.75	108.5	35.5	42.75	400	59	615	804	81.75	58.75	238.25	227.25	59	257	74.5	58.5
2014	S2	3203	3203	Intervention	3	NA	0	36.6	1	NA	NA	0	1	1	M	41	Negative	1/11/2012	NA	0	1	1	2593	844.75	149.75	622	1010	2228.75	120	1568.75	300	1748	1903.5	361	162	511.5	1756.5	1669.5	280.75	331.75	302.5
2014	S2	3203	3203	Intervention	3	NA	1	35.7	1	NA	NA	0	0	1	M	17	Negative	1/11/2012	NA	0	3	0	3393	87.5	108.5	2862.75	135.5	123	72	484	55.5	381.75	635.5	45	170.5	88	103	63.25	79.25	95.5	59.5
2014	S2	3203	3203	Intervention	3	NA	0	36.1	1	NA	NA	0	0	1	F	12	Negative	1/11/2012	NA	0	1	1	3062	185.25	117.25	1555.5	479.75	2413	139.25	709.75	363	186.25	570	98.25	152.75	419.5	451	237	275.5	334.5	278.5
2014	S2	3203	3203	Intervention	3	NA	0	36.1	1	NA	NA	0	0	1	F	7	Negative	1/11/2012	NA	0	1	1	3361	49.5	68	74	210	274.75	197.25	56	105.5	67	110	48.5	52.25	165	211.75	115.5	94.25	148	125
2014	S2	3203	3203	Intervention	3	NA	0	35.8	1	NA	NA	0	0	1	M	5	Negative	1/11/2012	NA	0	1	1	3438	NA	NA	NA	NA	NA	NA	NA	NA	NA	NA	NA	NA	NA	NA	NA	NA	NA	NA
2014	S2	3203	3203	Intervention	3	NA	0	36.3	1	NA	NA	0	0	1	M	2	Negative	1/11/2012	NA	0	3	1	3238	28.5	39.75	35.5	43.75	27.5	36.5	29.5	45	2735.5	42.5	34	32	70.75	66	52.75	37	52.5	45.5
2014	S2	3203	3203	Intervention	3	NA	0	36	0	0	NA	0	0	1	F	25	Negative	1/11/2012	NA	0	3	1	2264	266.75	43	131.5	145	208	33.5	3330.75	56.5	707.5	697.75	79	93	84	83	55.25	256.25	46	41.5
2014	S2	3203	3203	Intervention	3	NA	0	36.6	1	NA	NA	0	0	1	F	46	Negative	1/11/2012	NA	0	1	1	3132	1411.75	693.25	154	1604.5	1274.5	145.5	1663.75	198.75	351.25	1297	1816.5	479	512.75	344	180.5	871	239.25	238.5
2014	S2	3203	3203	Intervention	3	NA	1	37	1	NA	NA	0	1	1	M	25	Negative	1/11/2012	NA	0	1	1	3173	NA	149	142.25	460.25	NA	96	NA	267	NA	NA	NA	NA	380	403	221	389	263.75	261.75
2014	S2	3203	3203	Intervention	3	NA	0	35.4	1	NA	NA	0	0	3	M	15	Negative	1/11/2012	NA	0	1	1	2915	612	118	153.25	1580.5	6740.75	203.75	4689	334.25	6616.5	8781.25	898	90.25	583.5	406.5	211.75	224.25	269.5	255.5
2014	S2	3203	3203	Intervention	3	NA	0	36.3	1	NA	NA	0	0	1	M	10	Negative	1/11/2012	NA	0	1	1	3277	70	97.5	109	304	94.5	76.5	153.75	146.5	386.25	170.5	59.5	94.5	211.25	308	167.75	171.75	206	197
2014	S2	3203	3203	Intervention	3	NA	1	36.3	1	NA	NA	0	0	1	F	63	Negative	1/11/2012	NA	0	1	1	3328	2461.75	108.5	139	655.5	2395.75	3130.25	5876.25	274.75	1718.5	2954	2458	512.75	882.5	377	220.5	635.5	273.5	258.5
2014	S2	3203	3203	Intervention	3	NA	1	36.9	1	NA	NA	0	0	1	F	7	Negative	1/11/2012	NA	0	1	1	3202	44	60	59	190.75	43	49.5	755	82.75	458.75	90.5	48	44.75	216.5	235.25	101	88.5	128.25	110.5
2014	S2	3203	3203	Intervention	3	NA	0	35.6	1	NA	NA	0	0	1	M	2	Negative	1/11/2012	NA	0	1	1	3589	66.5	90.5	106	354.5	59.25	73.5	60.5	149.25	79	75.75	60.5	62	178.25	276.75	171.75	151.5	223.25	201.5
2014	S2	3203	3203	Intervention	3	NA	0	36.2	1	NA	NA	1	0	1	M	26	Negative	1/11/2012	NA	0	1	1	2920	464.75	489.25	296	796.5	255.75	172.25	19080	562.75	2350.75	NA	459.5	165	576.5	731.25	409.5	416.5	512.75	494.25
2014	S2	3203	3203	Intervention	3	NA	0	35.5	1	NA	NA	0	0	1	F	20	Negative	1/11/2012	NA	0	3	1	3115	348.5	172.5	1891	1512.5	3428	123.5	5136.75	109.25	1278.75	2724	340.75	117	270.25	325	126.5	161.25	91	86.75
2014	S2	3203	3203	Intervention	3	NA	1	36.1	1	NA	NA	1	0	1	F	30	Negative	1/11/2012	NA	0	1	1	3079	513.5	113.25	1733	375.5	707.5	121	94	282.5	800	1068.25	1013	347.25	532	394.25	372	483.25	304.5	237.25
2014	S2	3203	3203	Intervention	3	NA	0	35.6	1	NA	NA	0	0	1	F	52	Negative	1/11/2012	NA	0	3	0	2596	700	54	249.5	766.75	1104.75	469.5	10356.5	120.25	1392.5	1859.25	989	659	369.5	1198.75	79.5	305.75	65	59.5
2014	S2	3203	3203	Intervention	3	NA	0	36.1	1	NA	NA	1	0	1	M	15	Negative	1/11/2012	NA	0	3	0	2790	NA	NA	NA	NA	NA	NA	NA	148.5	2072.75	NA	NA	50.5	NA	NA	NA	NA	NA	NA
2014	S2	3203	3203	Intervention	3	NA	0	35.8	1	NA	NA	0	0	1	M	12	Negative	1/11/2012	NA	0	3	1	2553	34.5	36.25	34	69	6791	968.75	223.5	43	1107.5	1312.25	38.25	36	84.5	147.75	47	97	46.25	42.5
2014	S2	3203	3203	Intervention	3	NA	0	35.9	1	NA	NA	0	0	1	M	3	Negative	1/11/2012	NA	0	3	0	2669	28.5	36.25	34.5	39.75	30.5	36.5	30.5	42.5	5893	33	34	32.25	58.75	59.5	49	37	49	46.5
2014	S2	3203	3203	Intervention	3	NA	0	35.8	1	NA	NA	1	0	1	F	20	Negative	1/11/2012	NA	0	5	1	3226	NA	NA	NA	511.75	689.25	NA	751	NA	828	1332.75	NA	NA	NA	418.5	NA	NA	NA	336.5
2014	S2	3203	3203	Intervention	3	NA	0	36.2	1	NA	NA	0	0	1	F	12	Negative	1/11/2012	NA	0	3	1	2718	23.5	34.5	134.5	39.5	309.5	32	97.25	34	3572	307	31	33	59.5	65.5	42.5	41	36	34.75
2014	S2	3203	3203	Intervention	3	NA	0	36.3	1	NA	NA	0	0	1	M	5	Negative	1/11/2012	NA	0	4	1	3303	25.5	33.5	33.5	40.5	36.5	49.5	29	36	28	63.5	34	34.75	71.75	155.25	119.5	33.75	41.5	42
2014	S2	3203	3203	Intervention	3	NA	0	36.7	1	NA	NA	0	0	1	F	25	Negative	1/11/2012	NA	0	2	1	3158	141	123.25	262.75	665.75	1086	218.5	1243.5	278	2311	2621.5	344	190.75	592.5	703.25	389.75	215	377.75	260.5
2014	S2	3204	3204	Intervention	3	NA	0	37	1	1	NA	0	0	1	F	35	Negative	4/11/2012	NA	0	1	1	2874	1374.5	172	363.25	1359	740.5	147.5	1780	360.75	1576.75	2399.25	387.5	132.25	450.5	881.75	327	314.5	382.5	372.25
2014	S2	3204	3204	Intervention	3	NA	0	37	1	1	NA	0	0	1	M	17	Negative	4/11/2012	NA	0	1	1	3254	413.75	103.5	117.75	661	386.5	155.75	203	176.5	230.5	292.5	65	97.5	223.25	300	182	245.75	267.75	199
2014	S2	3204	3204	Intervention	3	NA	0	37	1	1	NA	1	0	1	M	23	Negative	4/11/2012	NA	0	1	1	3124	477	69	92.5	258	3744.25	71.5	3442	136	2260.5	3411.25	451	88.5	459.5	401.25	123.75	153.25	162.5	145
2014	S2	3204	3204	Intervention	3	NA	0	37	1	1	NA	1	0	1	M	19	Negative	4/11/2012	NA	0	1	1	3376	88	108.75	135.5	386.75	426	84.75	145.5	196	310.25	431.75	66	76.5	235.25	312.75	210.25	210	288	235.25
2014	S2	3204	3204	Intervention	3	NA	0	36.5	1	1	NA	1	0	1	M	35	Negative	4/11/2012	NA	0	1	1	3044	2120.75	129	137.5	362.75	11951.25	2085	1803	200.75	959.25	3125.5	560	272.75	402	351.25	206.75	1422.75	222	205
2014	S2	3204	3204	Intervention	3	NA	0	37	1	1	NA	0	0	1	F	17	Negative	4/11/2012	NA	0	2	1	3230	623	160	242.5	604.5	718	101	2070.75	258.5	3902	4868	3000.5	839.5	1171.5	462.5	236.5	405	345	280.5
2014	S2	3204	3204	Intervention	3	NA	0	37	1	1	NA	0	0	1	F	22	Negative	4/11/2012	NA	0	2	1	3063	1481.25	188.5	2587.5	1122.5	12085.75	1556	6627.5	393.5	1114.75	1481.75	1708	322	858.25	908	299	314	452.25	359.75
2014	S2	3204	3204	Intervention	3	NA	0	36.5	0	0	NA	0	0	1	F	28	Negative	4/11/2012	NA	0	1	1	3245	1290	111	858.5	1770.5	201.75	93	175.5	221	408.25	836.75	926	198	404	405	223.25	289.75	284	304
2014	S2	3204	3204	Intervention	3	NA	0	37	0	0	NA	1	0	1	M	20	Negative	4/11/2012	NA	0	1	1	2878	830	197	462.5	2503.5	3197.5	115.5	11131.5	348.5	2959.75	4517.5	4437	746.25	753.25	994.75	515.25	288	326.75	292
2014	S2	3204	3204	Intervention	3	NA	0	37	1	1	NA	1	0	1	M	8	Negative	4/11/2012	NA	0	1	1	3321	137.5	190.25	222.25	707.25	208	160.5	307	438.25	210.5	181.5	142.5	123.25	375.5	580.5	358.75	356.5	458.5	438.5
2014	S2	3204	3204	Intervention	3	NA	0	36.7	0	0	NA	0	0	1	F	3	Negative	4/11/2012	NA	0	2	1	2992	105	132.25	141.75	627.5	100	119	98.5	216.25	140	99	93	106	409.75	905.25	240	330.25	489.25	386.75
2014	S2	3204	3204	Intervention	3	NA	0	37	0	1	NA	1	0	1	M	55	Negative	4/11/2012	NA	0	1	1	3023	NA	NA	NA	NA	NA	NA	NA	NA	NA	NA	NA	NA	1186	NA	567	415.5	317.75	349
2014	S2	3204	3204	Intervention	3	NA	0	37	1	1	NA	0	0	1	M	16	Negative	4/11/2012	NA	0	1	1	3388	90.5	107.5	269.25	484.5	NA	NA	NA	240	NA	NA	94.5	NA	306	402.5	268.75	288.25	284.5	281.5
2014	S2	3204	3204	Intervention	3	NA	0	37	1	1	NA	0	0	1	M	20	Negative	4/11/2012	NA	0	1	1	2902	201.5	171.75	739	822.5	1627	131	1702.5	423.5	913	1102.5	145.5	109	407	730	321	325.25	411.75	428
2014	S2	3204	3204	Intervention	3	NA	0	37	1	1	NA	0	0	1	F	35	Negative	4/11/2012	NA	0	1	1	2682	1147.75	209.5	253.5	815.5	1361.5	193.25	685	459	1534	2507.5	289.5	141	747.75	805.25	369.5	596.25	739	605.5
2014	S2	3204	3204	Intervention	3	NA	0	37	1	1	NA	1	0	1	F	7	Negative	4/11/2012	NA	0	1	1	3298	NA	NA	NA	723.5	NA	NA	NA	NA	NA	NA	108	NA	520	NA	NA	NA	643	539
2014	S2	3204	3204	Intervention	3	NA	0	36.5	1	1	NA	1	0	1	F	15	Negative	4/11/2012	NA	0	1	1	3122	85.5	101.75	159	505.5	NA	101	91.75	212.5	103.5	NA	64.5	76	284.25	426.75	198.75	257.75	300.25	269
2014	S2	3204	3204	Intervention	3	NA	0	37	0	1	NA	0	0	1	M	10	Negative	4/11/2012	NA	0	1	1	2961	73.5	161.25	119.25	317.5	163	114.25	1042.75	196.5	135	238	69.75	72.5	195.25	521.25	331	166	228.25	215.5
2014	S2	3204	3204	Intervention	3	NA	0	36.5	1	1	NA	0	0	1	M	6	Negative	4/11/2012	NA	0	1	1	2606	130	205	346.25	1129.25	145	152.5	2598	564.75	3957.5	NA	128	171.5	638.25	866	362	325	464.5	412.5
2014	S2	3204	3204	Intervention	3	NA	0	37	1	1	NA	0	0	1	F	16	Negative	4/11/2012	NA	0	1	1	3611	97	125.5	145	432.5	146.75	118	121	206.75	312.5	195.5	82.5	81	292	457.25	220	197.5	309	274.25
2014	S2	3204	3204	Intervention	3	NA	0	36.5	1	1	NA	0	0	1	M	8	Negative	4/11/2012	NA	0	1	1	3246	50	63.25	77.5	215.5	57	59.5	97.5	119.5	52	69.5	47.75	50.5	165.5	272	123.5	105.75	149.25	136.5
2014	S2	3204	3204	Intervention	3	NA	0	36.5	1	1	NA	0	0	1	M	5	Negative	4/11/2012	NA	0	1	1	3211	76.25	97	123	368.5	64.25	74.25	71.75	183.5	105.75	78	69.5	67	309.5	431.25	205.25	308.5	364.25	243.75
2014	S2	3204	3204	Intervention	3	NA	0	37	1	1	NA	1	0	1	M	18	Negative	4/11/2012	NA	0	1	1	2921	349.75	163.25	275.25	815.75	786.5	160	160	271	1324	3591.75	252.25	336.5	536	544	275.5	431.75	365.5	336.75
2014	S2	3204	3204	Intervention	3	NA	0	36.5	1	1	NA	0	0	1	M	12	Negative	4/11/2012	NA	0	1	1	3489	99.25	110	134.5	386	130.25	90.25	1057	245.5	313.25	680.25	78	169.25	339.25	412.75	459.5	224.5	245.25	224
2014	S2	3204	3204	Intervention	3	NA	0	37	1	1	NA	1	0	1	M	29	Negative	4/11/2012	NA	0	1	1	2785	686	566	1455.75	1960.5	2943.75	106.75	24482.5	298.25	8171	10234.5	700	179	753.75	7215.75	299	361.25	281.75	252.5
2014	S2	3204	3204	Intervention	3	NA	0	37	1	1	NA	0	0	1	F	4	Negative	4/11/2012	NA	0	1	1	3452	51	60.5	76.25	201	64.5	58	639.75	102.5	113	142	50	50.75	381.25	428.5	121.5	96	125.25	117.5
2014	S2	3204	3204	Intervention	3	NA	0	37	1	1	NA	1	1	1	M	30	Negative	4/11/2012	NA	0	1	1	3530	589.5	569.5	270	428	521	94.5	1819.5	159.75	2194	2760	507	194.5	509	750	163	240.5	188	192
2014	S2	3204	3204	Intervention	3	NA	0	37	0	1	NA	1	0	1	F	22	Negative	4/11/2012	NA	0	1	1	3237	205	272.75	254.5	488.25	241	114.25	NA	332	377.25	1212.25	105.5	123.5	539	566.25	248.75	313.5	334.5	306
2014	S2	3204	3204	Intervention	3	NA	0	37	1	1	NA	0	0	1	F	23	Negative	4/11/2012	NA	0	1	1	3304	127.5	64	884	218.75	310.25	54.5	1118.25	128	945.75	1592.5	156.5	93	345.75	386.5	107.5	776	133	126
2014	S2	3204	3204	Intervention	3	NA	0	37	1	1	NA	0	0	1	F	30	Negative	4/11/2012	NA	0	1	1	3268	832.25	87	125.5	350	569.25	83.5	250.5	207.25	1461	2090.5	137.5	73.5	258	363	138.75	240.75	232.5	185.25
2014	S2	3204	3204	Intervention	3	NA	0	37	1	1	NA	0	0	1	F	11	Negative	4/11/2012	NA	0	1	1	3691	59	84	105	291	459.75	499	115	136.5	81	129.5	64	91.5	182	350.25	149.75	164.5	189.5	176
2014	S2	3204	3204	Intervention	3	NA	0	37	1	1	NA	0	0	1	F	20	Negative	4/11/2012	NA	0	1	1	3636	266	102.5	155.5	322.75	283.25	94.75	844.5	157.25	425.5	399	63.5	106.5	366	371.75	172.5	1180.75	211.25	209.5
2014	S2	3204	3204	Intervention	3	NA	0	37	1	1	NA	1	0	1	F	50	Negative	4/11/2012	NA	0	1	1	2974	1517.25	1172.5	1357	943.75	6209	159.5	23741.5	284	1247.75	2028.5	413	1130.5	993.5	2036.5	482	438	280.25	293
2014	S2	3204	3204	Intervention	3	NA	0	37	1	1	NA	1	0	1	M	26	Negative	4/11/2012	NA	0	1	1	3180	1060.75	124	114	331.5	131.25	76.5	460.5	188	214.75	155.5	677.5	207	328.75	363.5	171	270.75	210	195.25
2014	S2	3204	3204	Intervention	3	NA	0	37	0	1	NA	0	0	1	F	70	Negative	4/11/2012	NA	0	3	1	2651	934.25	160	591	142	185	53	1954.75	76.25	733.75	1646.75	254.75	1091.75	428.5	535	721.5	680	73	64
2014	S2	3206	3206	Control	4	NA	0	36	0	0	NA	1	0	1	F	25	Negative	2/11/2012	NA	0	1	1	3221	570	102.25	121.5	313	5482.75	174.25	357.5	223.5	96	1250.75	1531.75	392.5	406	306	219	156.5	197	297.5
2014	S2	3206	3206	Control	4	NA	0	36.4	0	0	NA	1	0	1	M	4	Negative	2/11/2012	NA	0	2	1	3080	55.5	70	86	222.75	199	128.5	91.5	120	58.5	53.75	52.5	57	142.75	237.75	121	104	144	143
2014	S2	3206	3206	Control	4	NA	0	36.1	0	0	NA	1	1	1	F	30	Negative	2/11/2012	NA	0	1	1	2620	605.5	342.5	15386.5	1381.75	9903	111.25	22922.5	340	6606.5	6209.25	123.25	119	460.75	863.5	243.5	276.75	320	296.5
2014	S2	3206	3206	Control	4	NA	0	36.1	0	0	NA	1	1	1	M	13	Negative	2/11/2012	NA	0	1	1	3250	94.75	117	303	599	1352.75	943.5	472	412.25	1168.75	1705	75	91.5	642.5	669	250.5	196.5	242.75	251.5
2014	S2	3206	3206	Control	4	NA	0	36.1	0	0	NA	1	1	1	M	16	Negative	2/11/2012	NA	0	1	1	2762	223.25	536.75	269	573.5	1917.5	141	10228	312.25	1284	1905.5	206	119	584	836.75	526.5	349	392	371
2014	S2	3206	3206	Control	4	NA	0	36.1	0	0	NA	1	1	1	M	45	Negative	2/11/2012	NA	0	1	1	3064	1768.25	191.75	316.5	767.75	249.5	132.75	1744.75	311.75	2398.5	2467	3869	320	737.75	673	297.5	824	345.25	435
2014	S2	3206	3206	Control	4	NA	0	36.1	0	0	NA	1	1	1	F	18	Negative	2/11/2012	NA	0	3	1	2626	176	49.25	1132.5	169.25	148	115.25	1647	78	1206	871.25	51.75	107.5	174.25	154	63.25	832	87.25	64.5
2014	S2	3206	3206	Control	4	NA	0	36.1	0	0	NA	1	1	1	F	40	Negative	2/11/2012	NA	0	1	1	3183	545.5	188.5	754	4590	5764.5	210.75	5651.5	231.25	7943.75	11933.25	960.5	288	648.5	539.25	220.5	243	241.25	248.5
2014	S2	3206	3206	Control	1	NA	0	36.2	0	0	NA	1	1	1	M	28	Negative	2/11/2012	NA	0	1	1	3323	106	126	154	412.25	121	109	301.5	227.5	609.75	222	155	155	921.75	873	210	254.25	261	270.25
2014	S2	3206	3206	Control	4	NA	0	36.1	0	0	NA	1	1	1	M	5	Negative	2/11/2012	NA	0	1	1	2685	71.75	95	117.5	317	72.5	81.25	69.25	160	902	113	60.75	68.5	188.25	273.5	168	136.75	194.5	198.25
2014	S2	3206	3206	Control	4	NA	0	36.1	0	0	NA	1	1	1	M	14	Negative	2/11/2012	NA	0	1	1	3099	263	437.25	147.25	389.5	803.75	137	100.5	231	141.5	168	79	88	269.5	402.75	206.25	219	305.5	279.5
2014	S2	3206	3206	Control	4	NA	0	36.1	0	0	NA	1	1	1	M	6	Negative	2/11/2012	NA	0	1	1	3382	73.5	103	1857.5	368.75	839.5	87.5	206.5	197.5	128	397	65.5	77	402.5	505.5	189	157	221.25	214.5
2014	S2	3206	3206	Control	4	NA	0	36.2	0	0	NA	1	1	1	F	40	Negative	2/11/2012	NA	0	1	1	2920	2634.75	1878.5	531	471.75	217	189.5	621.75	324	530.5	2924.25	1210.75	1597.5	756	573.75	412.75	562	282.5	300
2014	S2	3206	3206	Control	4	NA	0	37	0	0	NA	1	0	1	F	8	Negative	2/11/2012	NA	0	2	1	3126	99.5	127.5	161.25	406	154.25	147.75	150.75	251	133	126.5	80.25	88	239	376	225	227.5	279.5	284.5
2014	S2	3206	3206	Control	4	NA	0	36.5	0	0	NA	1	1	1	M	35	Negative	2/11/2012	NA	0	1	1	2953	818	83	149.5	657.25	212	78.5	3817.75	135.5	18001.25	19088.25	160.5	310	344	737.5	145	205.75	208.5	156
2014	S2	3206	3206	Control	4	NA	0	37	0	0	NA	1	1	1	M	18	Negative	2/11/2012	NA	0	1	1	3460	118.5	197	300	529	105	121	457.75	317.5	357.75	494.5	90.5	175.25	309	529	282.5	330	392.5	337.75
2014	S2	3206	3206	Control	4	NA	0	37	0	0	NA	1	1	1	M	5	Negative	2/11/2012	NA	0	1	1	3498	62	79	93.75	246.25	57	65.75	58	130	63	56.25	58	63.5	197	276.5	139.25	119.25	163	153.5
2014	S2	3206	3206	Control	4	NA	0	36.1	0	0	NA	1	1	1	F	11	Negative	2/11/2012	NA	0	1	1	3419	127.5	183.5	118.5	358.5	1302.5	78	338	175.5	152.5	302	63.75	71.5	260.75	417.75	181	173.75	204	210.25
2014	S2	3206	3206	Control	4	NA	0	36.1	0	0	NA	1	1	1	F	28	Negative	2/11/2012	NA	0	1	1	2922	624.5	319	4710.75	600.25	136.5	111.5	11156.25	181.5	2310	2844	116	96.75	272.25	761.75	154.5	200.25	207.5	198.75
2014	S2	3206	3206	Control	4	NA	0	36.1	0	0	NA	1	1	1	F	35	Negative	2/11/2012	NA	0	1	1	2934	881	486.5	5192.75	1980.5	2415	691.25	738	590.75	792.25	9248	2187.5	931.5	1068.75	694.5	715.5	421	406.5	424.75
2014	S2	3206	3206	Control	4	NA	0	36.7	0	0	NA	1	1	1	M	6	Negative	2/11/2012	NA	0	1	1	3208	80.25	104.75	133.25	322.25	701.5	111.5	95.75	189.25	1764.25	117.5	75.5	83.75	183.5	389	197	160	223.5	230
2014	S2	3206	3206	Control	4	NA	0	36.1	0	0	NA	1	1	1	M	2	Negative	2/11/2012	NA	0	1	1	3594	59.5	87.25	103	293.75	73	69.5	64.25	147	121.75	70.5	58	63	187.25	270.5	151	167.25	203	177
2014	S2	3206	3206	Control	4	NA	0	36.2	0	0	NA	1	1	1	F	26	Negative	2/11/2012	NA	0	1	1	3512	507.75	270.25	525.5	542	650.25	222.75	603	229	365.5	935	83	95.25	366	454.5	217.25	503	278	287.25
2014	S2	3206	3206	Control	4	NA	0	36	0	0	NA	1	1	1	M	15	Negative	2/11/2012	NA	0	1	1	3208	71.5	322.25	400.25	802.25	130.75	97	5186.25	256.5	6707.5	7590.75	86.25	71.5	305.75	411.5	175.25	170.75	194.75	201.5
2014	S2	3206	3206	Control	4	NA	0	36.5	0	0	NA	1	1	1	M	9	Negative	2/11/2012	NA	0	1	1	2699	333	628.75	9069.25	1483.75	5360.5	395.75	7260	392.5	14435.75	16326.75	141.5	111	351.75	782.5	225.25	633	276	389
2014	S2	3206	3206	Control	4	NA	0	36.1	0	0	NA	1	1	1	M	5	Negative	2/11/2012	NA	0	1	1	2946	77.5	97.25	188.75	379.75	110.25	73.5	211.5	181.75	258	437.5	62.5	64.25	160	260	156	128	180.25	184.75
2014	S2	3206	3206	Control	4	NA	0	36.1	0	0	NA	1	1	1	M	12	Negative	2/11/2012	NA	0	1	1	2827	344	239.75	3115.75	545.5	19558.25	1812.25	956	391	1127.75	2364.5	124.75	105.75	372.5	763.5	286.25	275.25	310	325
2014	S2	3206	3206	Control	4	NA	0	36.1	0	0	NA	1	0	1	M	14	Negative	2/11/2012	NA	0	1	1	3025	108.75	119.75	1199.75	535	273	138	3661.5	225.5	510	3086.5	66.75	88.25	337.5	510.75	209.75	201.5	223	231.5
2014	S2	3206	3206	Control	4	NA	0	36.1	0	0	NA	1	0	1	M	12	Negative	2/11/2012	NA	0	1	1	2993	113	150.75	197.25	443.25	914	562.5	2255	298.25	131.75	208.5	120.25	94	687	675.5	279.75	233	308.5	297.75
2014	S2	3206	3206	Control	4	NA	0	36.1	0	0	NA	1	0	1	F	7	Negative	2/11/2012	NA	0	1	1	3056	135	94.5	118.75	402	13292	2235.75	90.75	195.5	111.5	135	61	77.5	335.75	415.75	197.75	161	229	223
2014	S2	3206	3206	Control	4	NA	0	36.1	0	0	NA	1	1	1	F	60	Negative	2/11/2012	NA	0	1	1	3133	907	168.25	4024.5	1222	2925.75	142.75	7371.5	484	2334	24623.25	409.5	220.75	483.25	1102	243	525.5	270	311
2014	S2	3206	3206	Control	4	NA	0	36.2	0	0	NA	1	0	1	F	14	Negative	2/11/2012	NA	0	1	1	3208	98.75	118.25	148.25	330.75	589.25	224.5	470.75	202	5491	182.5	77.75	85	212	333.25	189.5	207	251	243
2014	S2	3206	3206	Control	4	NA	0	36.1	0	0	NA	1	0	1	F	6	Negative	2/11/2012	NA	0	1	1	2912	91	129.75	154	552	835	299.25	98	224.5	1874.5	117	83	99.5	672.5	709	224	199	265.25	274.5
2014	S2	3206	3206	Control	4	NA	0	36.1	0	0	NA	1	0	1	F	15	Negative	2/11/2012	NA	0	3	1	2499	46.5	65.5	1360.5	150	1296.75	62	656.5	58.75	1133.25	3300.5	45.5	44.5	195	270	55.25	46.5	59.75	78
2014	S2	3206	3206	Control	4	NA	0	36.1	0	0	NA	1	0	1	F	50	Negative	2/11/2012	NA	0	1	1	3119	1721.25	327.25	118.75	419.5	1312	65.5	1535.75	161.75	601.25	738.5	1084.75	512	489	429.25	151.75	1150.75	178.25	179.25
2014	S2	3206	3206	Control	4	NA	0	36.1	0	0	NA	1	0	1	F	35	Negative	2/11/2012	NA	0	3	1	2490	315.25	354.25	272.5	607	8412.5	47	5454.5	179	704.25	6131.75	307	672	443.75	2144	83	780.75	198.5	73
2014	S2	3206	3206	Control	4	NA	0	36.1	0	0	NA	1	0	1	F	5	Negative	2/11/2012	NA	0	1	1	3306	92	114.5	130	414.5	82	93.25	86	198.5	123.75	117	79	84.75	268	619	201.75	287.75	391.75	249
2014	S2	3207	3207	Intervention	1	28.1	1	39	0	0	NA	1	1	2	M	41	Positive	5/11/2012	Pf	1	1	1	2686	19803.5	398.25	666.75	4167.25	4724.5	2401.5	12427.5	253.25	14468.75	23002	157.5	80	442.25	830.5	263.5	204.5	222.5	226.75
2014	S2	3207	3207	Intervention	3	NA	1	36.7	1	NA	NA	0	0	1	M	25	Negative	5/11/2012	NA	0	1	1	3034	621	327	1334	1564.25	1343.5	158.5	8065.5	396.25	18218.75	24316.75	274	149.75	537.5	3033	293.25	1134.25	387.5	363.5
2014	S2	3207	3207	Intervention	3	NA	0	36.8	0	1	NA	1	0	1	M	55	Negative	5/11/2012	NA	0	1	1	3037	227	834	2827.5	737.5	331.5	153.5	1903.5	440.5	1228.75	5906.5	106	138.25	556.5	1010	363.25	326	406	452.5
2014	S2	3207	3207	Intervention	3	NA	0	37.1	0	0	NA	0	0	1	F	10	Negative	5/11/2012	NA	0	2	1	3158	196.25	588	270	601	214.75	150.75	3002	327.25	6338	10166.25	348	145.25	421.25	1441.5	351.25	2253.25	275.5	296
2014	S2	3207	3207	Intervention	3	NA	1	36.9	0	0	NA	1	0	1	F	5	Negative	5/11/2012	NA	0	3	1	3357	32.5	44	45.5	58.5	67.5	43.5	48.25	55.5	31	40.5	39	38.5	71.5	113.5	64.5	52.5	80.25	76.5
2014	S2	3207	3207	Intervention	3	NA	1	36.3	1	NA	NA	0	0	1	M	48	Negative	5/11/2012	NA	0	1	1	2696	2231.5	9396.5	910.25	3418	630	160	26318	341	8548.25	14514.75	761.5	4101.5	2215	734.25	407.75	377.5	181.5	203.5
2014	S2	3207	3207	Intervention	3	NA	0	36.1	0	0	NA	1	0	1	M	20	Negative	5/11/2012	NA	0	1	1	3057	158	197.75	790.25	341.75	3865.5	405	514	168.75	275.5	2232.75	71.5	95.75	213.5	354.25	178.5	1594.5	221.5	195
2014	S2	3207	3207	Intervention	3	NA	1	36.4	0	0	NA	1	1	1	M	32	Negative	5/11/2012	NA	0	2	1	2634	1319	734.25	1943	6162	7375.75	387.25	14161.25	287	8790	11697	1358	190.5	989.75	1237	247.25	436.5	295.5	315
2014	S2	3207	3207	Intervention	3	NA	1	36.5	1	NA	NA	1	0	1	F	25	Negative	5/11/2012	NA	0	1	1	3475	145.5	236	880	252	843	53.75	480	117.5	636	783.5	641.25	152.5	326.5	401	137	142.5	131.5	126.75
2014	S2	3207	3207	Intervention	3	NA	0	36.7	0	0	NA	0	0	1	F	40	Negative	5/11/2012	NA	0	1	1	2958	570.25	164.75	124.75	389.75	159	80.75	1770	177	737	600.75	769.25	236	489.75	388.25	196.5	248.75	245	220.75
2014	S2	3207	3207	Intervention	3	NA	1	36.1	1	NA	NA	0	0	1	M	37	Negative	5/11/2012	NA	0	1	1	2903	1962.75	855.25	5938.5	531.5	6847.25	147.5	5067	296	1360.5	3536	3899	4003.5	1854.5	512.5	324.25	323	334.5	633.5
2014	S2	3207	3207	Intervention	3	NA	1	36.7	1	NA	NA	0	0	1	F	27	Negative	5/11/2012	NA	0	2	1	2670	1031.5	130	5528.75	862	2425.25	108.5	19680	414	7834.75	9983.5	132	461	480	646.5	226.25	269	300	333.5
2014	S2	3207	3207	Intervention	3	NA	0	36.7	1	NA	NA	1	0	1	M	15	Negative	5/11/2012	NA	0	1	1	3403	93.5	132	147.5	512.5	1667.5	90.25	309	201.75	163.75	217.5	104	87.5	255.25	376.5	1273	258.5	379.5	277.5
2014	S2	3207	3207	Intervention	3	NA	1	36.2	0	0	NA	0	0	2	F	57	Negative	5/11/2012	NA	0	1	1	2960	1687	126.5	482.5	412.5	236.25	112.75	1432.25	316.5	1674.5	5579.5	856	288.5	649.75	495	323.25	287.25	257.5	252.25
2014	S2	3207	3207	Intervention	3	NA	0	36.5	1	NA	NA	0	0	1	M	38	Negative	5/11/2012	NA	0	1	1	3342	540.5	207.75	1394.5	323.75	2415.5	222	6360.25	185.5	130	1657	4307.75	524	593	320.25	214.25	378.5	201.5	189.25
2014	S2	3207	3207	Intervention	3	NA	0	36.5	0	1	NA	0	0	1	F	26	Negative	5/11/2012	NA	0	1	1	3343	169.5	116.5	1721.5	277	4390.5	68.5	5881.5	142	1935.5	2909	200	92.5	203.75	479.25	143.5	531.25	157.75	168.75
2014	S2	3207	3207	Intervention	3	NA	0	36.4	1	NA	NA	0	0	1	F	2	Negative	5/11/2012	NA	0	1	1	4081	42	57	66	152.5	47.5	46.5	49.5	90.5	43	62.25	43.75	45.75	96.25	164.5	98.25	94.75	106.5	105.75
2014	S2	3207	3207	Intervention	3	NA	1	36.5	1	NA	NA	0	0	1	M	7	Negative	5/11/2012	NA	0	1	1	3987	79	138.25	146.75	377.5	101	86	155.75	177.5	86.75	366	71.25	82	671	622.5	183	163	216.75	229.75
2014	S2	3207	3207	Intervention	3	NA	1	36.7	1	NA	NA	0	0	1	M	5	Negative	5/11/2012	NA	0	1	1	3617	53.75	64.5	78.75	232.5	63.5	62.75	51	111.75	52	92	54.5	62	653.5	611	116.5	117.5	137.75	150
2014	S2	3207	3207	Intervention	3	NA	1	36.1	1	NA	NA	0	0	1	F	20	Negative	5/11/2012	NA	0	1	1	2841	1649.75	199.75	705.5	4876.25	2951.5	1447	21754.75	739.5	7816.25	13450.5	156.25	207	632	1300	446	603.75	558	454
2014	S2	3207	3207	Intervention	3	NA	1	36.8	0	0	NA	1	0	1	F	24	Negative	5/11/2012	NA	0	2	1	3509	1374.25	138.5	388.5	1206.5	352	167.5	2818.5	369.5	1240.5	3262.75	631.75	452.25	539.5	9441	1528.75	1371.75	320.25	287.5
2014	S2	3207	3207	Intervention	3	NA	0	36.7	0	0	NA	0	0	1	M	13	Negative	5/11/2012	NA	0	1	1	3211	217.25	111.5	141	268	428	96.5	152.25	133	1456	2737.25	52.5	62.5	167	374.75	142.5	148.25	162.5	176
2014	S2	3207	3207	Intervention	3	NA	0	36.5	0	0	NA	1	0	1	M	40	Negative	5/11/2012	NA	0	1	1	3137	206.5	118.25	166.25	818	679.75	95.25	4133.5	221	829	1200	243.25	265	329	363.5	355.25	222.5	326.75	242.5
2014	S2	3207	3207	Intervention	3	29.8	0	36.3	0	0	NA	1	0	1	F	15	Positive	5/11/2012	Pf	1	1	1	2945	116.5	930.25	155.5	849	23350	453.5	7425	417.5	11220.5	17821.75	84	151	276	746.5	208	376.75	215	252.5
2014	S2	3207	3207	Intervention	3	NA	0	36.7	1	NA	NA	1	0	1	F	42	Negative	5/11/2012	NA	0	2	1	2844	1483.5	125	217.5	1302	5951.75	534	7562.75	254	2863.5	4688.75	1272.25	534.25	1084.5	7930.25	504.75	1165.5	300.75	276.25
2014	S2	3207	3207	Intervention	3	NA	0	36.2	1	NA	NA	1	0	1	M	9	Negative	5/11/2012	NA	0	1	1	3380	74.5	87.75	110.25	359.75	464	72.5	524.5	141.5	137.75	180	75.25	71.5	345	357.75	150.5	202.5	187.5	183
2014	S2	3207	3207	Intervention	3	NA	1	36.5	1	NA	NA	1	0	1	F	7	Negative	5/11/2012	NA	0	3	0	3365	27.5	39.5	59	51	267	49	37	43.5	40	117	32.5	36.75	55	83.5	53	47	54.5	48
2014	S2	3207	3207	Intervention	3	NA	1	36.1	1	NA	NA	0	0	1	F	51	Negative	5/11/2012	NA	0	1	1	3073	1599	726	399.75	1359	4910.75	95.5	15375.25	245.5	1737	4160	497.75	192.75	951	1692.75	239.25	2888.5	261.75	260.75
2014	S2	3207	3207	Intervention	3	NA	0	36.3	1	NA	NA	0	1	1	M	25	Negative	5/11/2012	NA	0	1	1	3256	1136.5	150	594.5	509.5	NA	NA	NA	256.25	NA	NA	NA	NA	1152	702	226.25	767.5	269.75	275.75
2014	S2	3207	3207	Intervention	3	NA	0	36.1	0	0	NA	0	0	1	F	10	Negative	5/11/2012	NA	0	1	1	3784	64	69.5	81.5	188.75	324.75	76	115.5	100.75	53	100.75	56.5	109	178.5	213.25	118.5	114.5	134.75	147
2014	S2	3207	3207	Intervention	3	NA	0	37.1	0	0	NA	1	0	1	M	35	Negative	5/11/2012	NA	0	1	1	2915	1562.5	1724	164.75	867	3197.5	108.75	2153.25	187	348.25	1806.75	204.5	113.5	707	2082.25	280.5	248.25	203	196
2014	S2	3207	3207	Intervention	1	NA	1	36.8	0	1	NA	0	0	1	F	31	Negative	5/11/2012	NA	0	1	1	3090	96	132.5	219.5	439.5	1832.5	124	374.75	235.25	116	224	89.25	113.5	280	488.25	216	239.25	418.25	308
2014	S2	3207	3207	Intervention	3	NA	0	36.5	0	0	NA	0	0	1	M	9	Negative	5/11/2012	NA	0	3	0	3479	30.25	45.5	41	54	48.25	48	90.25	54.5	39	55.5	61	47.5	88.5	131.25	86	52.75	68.5	52
2014	S2	3207	3207	Intervention	3	NA	0	36.3	1	NA	NA	1	0	1	F	26	Negative	5/11/2012	NA	0	3	1	2544	312	82.75	5820.75	248.25	7986.5	235.5	2310	125	832.75	881	131.5	53	627	4175	1815.25	400.75	327.75	108.75
2014	S2	3207	3207	Intervention	3	NA	1	37.2	1	NA	NA	1	0	1	F	25	Negative	5/11/2012	NA	0	1	1	2997	920	NA	NA	NA	3777	58.5	6130	234.25	2548.75	2860.5	334	475.5	269.25	NA	NA	488.75	NA	NA
2014	S2	3207	3207	Intervention	3	NA	0	36.5	0	1	NA	1	1	1	M	32	Negative	5/11/2012	NA	0	1	1	2554	1999.75	157	268	2195	2376.5	72.5	7220.75	NA	2262	4896.5	2043.75	712.5	706.25	2139.75	NA	2072	NA	NA
2014	S2	3215	3215	Control	4	NA	0	36.8	0	0	NA	0	0	1	M	33	Negative	4/11/2012	NA	0	1	1	2813	2134.5	136.25	1829	1191.5	291	NA	10490	240	1783	2707.75	237	123.5	287	1108.5	398.5	666.25	NA	NA
2014	S2	3215	3215	Control	4	34.8	1	37.3	0	0	NA	0	0	1	M	16	Positive	4/11/2012	Pv	1	1	0	2574	NA	NA	NA	NA	NA	NA	203.25	NA	NA	NA	NA	NA	454.75	NA	NA	NA	NA	NA
2014	S2	3215	3215	Control	4	NA	0	36.8	0	0	NA	0	0	1	F	5	Negative	4/11/2012	NA	0	1	1	2804	59.75	79.25	122.5	174.75	NA	52	NA	NA	NA	NA	48	48.75	212.75	300.5	NA	NA	NA	NA
2014	S2	3215	3215	Control	4	NA	1	37.2	0	0	NA	1	0	1	M	20	Negative	4/11/2012	NA	0	1	1	2638	559	152.5	162.5	NA	746.75	62.5	3232	NA	10335.5	11785.25	88	90	243	439.25	NA	345.5	NA	NA
2014	S2	3215	3215	Control	4	NA	1	36.1	0	0	NA	1	0	1	F	35	Negative	4/11/2012	NA	0	1	1	2481	668.5	591.75	4071.75	2241	1735	NA	1676.25	NA	5352	5967	133.5	92.5	493.75	4674.25	613.75	4497	NA	NA
2014	S2	3215	3215	Control	4	NA	0	36.9	0	0	NA	0	0	2	F	40	Negative	4/11/2012	NA	0	1	1	2711	962	280	238.25	NA	2156.75	390.5	869	NA	3076	5228.5	595.5	343.5	353.75	NA	NA	923.25	NA	NA
2014	S2	3215	3215	Control	4	NA	1	36.8	0	0	NA	0	0	2	M	4	Negative	4/11/2012	NA	0	3	0	2711	27.5	34.25	34.5	49.5	30.5	35	33.5	39	32.75	37	31.5	33.25	51.5	78	46	36.75	46	42.5
2014	S2	3215	3215	Control	4	22.3	1	37.3	0	0	NA	0	0	1	F	8	Positive	4/11/2012	Pf	1	1	0	2484	514.5	1369	185	NA	NA	4722.25	11902.75	831.5	20969	NA	101.75	118	246	2472	NA	NA	NA	NA
2014	S2	3215	3215	Control	4	NA	1	36.8	0	0	NA	0	0	1	F	24	Negative	4/11/2012	NA	0	2	1	2476	124.5	94.75	94.5	NA	2219.75	57	363.75	NA	206.75	2638.5	85	56	296	NA	NA	561.75	NA	NA
2014	S2	3215	3215	Control	4	NA	0	36.6	0	0	NA	0	0	1	M	4	Negative	4/11/2012	NA	0	2	1	2439	37	54.25	47	463.75	54	59.75	NA	63	59	261.25	40.5	44.75	148	166.25	NA	68.5	NA	NA
2014	S2	3215	3215	Control	4	42.9	0	36.5	0	0	NA	0	0	2	F	18	Positive	4/11/2012	Pv	1	1	1	2778	NA	286	NA	NA	197	74.5	1588.25	NA	306.5	708.25	54.75	82.5	558.5	583	NA	NA	NA	NA
2014	S2	3215	3215	Control	4	NA	1	36.4	0	0	NA	1	1	1	M	18	Negative	4/11/2012	NA	0	1	1	2769	72	NA	NA	545.25	1029	58.75	516.25	NA	545.75	813.25	60.5	123.25	555	494.75	NA	371	NA	NA
2014	S2	3215	3215	Control	4	NA	0	36.2	0	0	NA	0	0	1	F	10	Negative	4/11/2012	NA	0	1	1	3008	96.5	NA	138	NA	NA	88.75	NA	NA	NA	NA	67.5	NA	200.5	254.75	NA	159.25	NA	NA
2014	S2	3215	3215	Control	4	NA	0	36.3	0	0	NA	0	0	1	F	2	Negative	4/11/2012	NA	0	1	1	2997	NA	NA	NA	NA	56	58.25	97	NA	NA	NA	50.5	51.25	NA	NA	NA	NA	NA	NA
2014	S2	3215	3215	Control	4	NA	0	36.5	0	0	NA	0	0	1	F	50	Negative	4/11/2012	NA	0	1	1	2967	884.5	164.5	NA	NA	NA	126.75	2125.25	223.25	NA	NA	NA	209.75	NA	340	NA	310.75	NA	NA
2014	S2	3215	3215	Control	4	NA	0	36.3	0	0	NA	0	0	1	M	12	Negative	4/11/2012	NA	0	1	1	2979	110	NA	NA	NA	933.5	152.25	1017.5	NA	NA	NA	80.5	72.5	NA	NA	NA	NA	NA	NA
2014	S2	3215	3215	Control	4	NA	0	36.6	0	0	NA	0	0	1	F	3	Negative	4/11/2012	NA	0	1	1	3000	NA	NA	NA	NA	71.5	NA	169.5	NA	NA	NA	256.5	132.75	NA	NA	NA	NA	NA	NA
2014	S2	3215	3215	Control	4	NA	0	36.5	0	0	NA	0	0	1	F	7	Negative	4/11/2012	NA	0	1	1	3159	NA	NA	NA	NA	66	73	113	NA	87.5	NA	NA	110.75	NA	NA	NA	NA	NA	NA
2014	S2	3215	3215	Control	4	NA	0	36.3	0	0	NA	0	0	1	F	6	Negative	4/11/2012	NA	0	1	1	3151	NA	NA	NA	NA	57.25	69	NA	NA	NA	NA	84	73.25	211	NA	NA	NA	NA	NA
2014	S2	3215	3215	Control	4	NA	0	37.1	0	0	NA	1	0	1	F	37	Negative	4/11/2012	NA	0	1	1	3185	349.5	92	2359.5	402.5	135.5	59.75	658	NA	648	1416	297	251.25	282.5	275.75	NA	223.25	NA	NA
2014	S2	3215	3215	Control	4	NA	0	36.6	0	0	NA	1	0	1	M	6	Negative	4/11/2012	NA	0	1	1	3167	62	61	79.75	NA	89	66	151.5	NA	NA	NA	45	56.25	160.5	193	NA	160.25	NA	NA
2014	S2	3215	3215	Control	4	NA	0	36.9	0	0	NA	0	0	2	F	16	Negative	4/11/2012	NA	0	1	1	2802	NA	NA	469.5	NA	435	319.25	1745.25	NA	540.25	1276.25	181	NA	NA	NA	NA	NA	NA	NA
2014	S2	3215	3215	Control	4	NA	0	36.3	0	0	NA	1	0	1	M	8	Negative	4/11/2012	NA	0	1	1	3247	42.75	NA	76.5	NA	62	82.5	NA	NA	166.5	177.75	53.5	57	122.5	NA	NA	NA	NA	NA
2014	S2	3215	3215	Control	4	NA	0	36.5	0	0	NA	0	0	1	M	8	Negative	4/11/2012	NA	0	1	1	2862	66	NA	113	NA	NA	124.25	NA	NA	NA	NA	59.25	62	362.5	424.5	NA	NA	NA	NA
2014	S2	3215	3215	Control	4	NA	1	36.2	0	0	NA	0	0	1	M	7	Negative	4/11/2012	NA	0	1	1	2771	NA	NA	NA	NA	68.5	70.5	NA	NA	NA	NA	49	54.5	264.5	NA	NA	NA	NA	NA
2014	S2	3215	3215	Control	4	NA	0	36.8	0	0	NA	0	0	1	F	4	Negative	4/11/2012	NA	0	1	1	3125	NA	NA	NA	NA	70.5	85	NA	NA	NA	61	52	60.25	186.75	NA	NA	NA	NA	NA
2014	S2	3215	3215	Control	4	NA	1	36.7	0	0	NA	0	0	1	F	3	Negative	4/11/2012	NA	0	1	1	2785	48.5	60.5	NA	NA	46.25	60	61.75	NA	65.5	67.75	55	78.5	1690	1486.5	NA	101.75	NA	NA
2014	S2	3215	3215	Control	4	NA	1	37.1	0	0	NA	1	0	1	F	15	Negative	4/11/2012	NA	0	2	1	3036	141.75	101.25	183	652	272.5	71.5	137.25	NA	1044	1689.25	52.25	63.5	710.5	704.75	NA	242.5	NA	NA
2014	S2	3215	3215	Control	4	NA	0	36.7	0	0	NA	0	0	1	M	9	Negative	4/11/2012	NA	0	1	1	2846	55.5	624.75	1232	NA	63.5	69	193.5	133	231	670	53.75	62.25	347.25	293.5	NA	NA	NA	NA
2014	S2	3215	3215	Control	4	NA	0	36.7	0	0	NA	0	0	1	F	8	Negative	4/11/2012	NA	0	1	1	3132	56	94	105	NA	1102.5	80.5	NA	NA	584	2151.25	61.5	64.75	171.25	221.5	NA	NA	NA	NA
2014	S2	3218	3218	Intervention	2	NA	0	36	1	1	NA	0	0	1	F	3	Negative	8/11/2012	NA	0	1	1	3024	38	NA	NA	NA	85	76.25	43	NA	44.5	49.5	46.75	42.75	111	NA	NA	NA	NA	NA
2014	S2	3218	3218	Intervention	2	NA	0	36.4	0	0	NA	1	0	1	F	23	Negative	8/11/2012	NA	0	1	1	2750	3495	514.75	NA	677	2866.25	57.5	NA	NA	3248.5	4587	134.75	109.5	431.5	394.25	NA	NA	NA	NA
2014	S2	3218	3218	Intervention	2	40.4	1	36	1	NA	NA	0	0	1	F	14	Positive	8/11/2012	PfPv	2	1	1	2463	NA	NA	NA	NA	NA	NA	NA	NA	NA	NA	NA	NA	NA	NA	NA	NA	NA	NA
2014	S2	3218	3218	Intervention	2	NA	1	37	0	0	NA	0	0	1	F	11	Negative	8/11/2012	NA	0	2	1	3227	NA	NA	NA	NA	55.25	NA	128.75	NA	56.75	NA	NA	57.5	267.25	NA	NA	NA	NA	NA
2014	S2	3218	3218	Intervention	2	NA	0	36	1	1	NA	0	0	1	M	4	Negative	8/11/2012	NA	0	1	1	2793	38.5	NA	NA	NA	41.5	43.5	68	NA	63	60.5	38.75	40.25	NA	NA	NA	NA	NA	NA
2014	S2	3218	3218	Intervention	2	NA	1	37	1	1	NA	1	0	1	M	23	Negative	8/11/2012	NA	0	1	1	2608	107	211.5	166.5	NA	1577.5	114	15475.5	NA	2807.5	3428.5	79	68.75	391.5	646.5	703.25	144	NA	NA
2014	S2	3218	3218	Intervention	2	NA	0	36.4	0	0	NA	1	0	1	F	70	Negative	8/11/2012	NA	0	1	1	2442	NA	141.5	269.5	NA	13846.75	150.5	25239	211.5	7191.5	9008.5	328.5	260	921	4239.25	NA	NA	NA	NA
2014	S2	3218	3218	Intervention	2	NA	1	37	1	NA	NA	0	0	1	F	11	Negative	8/11/2012	NA	0	1	1	2985	55.5	NA	NA	NA	115.25	NA	125.25	NA	95.75	148.5	40.25	45.75	170	NA	NA	NA	NA	NA
2014	S2	3218	3218	Intervention	2	NA	0	36	1	1	NA	1	0	1	M	5	Negative	8/11/2012	NA	0	3	1	2719	24.5	30	28	35	46	38	28.5	30	27	74	32	32	42	55.25	41	30	36.5	41
2014	S2	3218	3218	Intervention	2	NA	1	37	0	0	NA	1	0	2	M	33	Negative	8/11/2012	NA	0	1	1	2571	NA	NA	2055.25	NA	NA	314.75	NA	NA	NA	NA	614.25	233.75	519.5	425.75	NA	1555	NA	NA
2014	S2	3218	3218	Intervention	2	NA	0	36	1	1	NA	1	0	1	F	42	Negative	8/11/2012	NA	0	1	1	3088	NA	NA	NA	NA	NA	NA	NA	NA	NA	NA	NA	NA	NA	NA	NA	NA	NA	NA
2014	S2	3218	3218	Intervention	2	NA	0	36.1	0	0	NA	1	0	1	F	60	Negative	8/11/2012	NA	0	1	1	2486	1250.75	NA	1269.25	NA	2759	131.75	22319	NA	9320.75	10217	633.75	177.5	1630.5	4670.25	NA	NA	NA	NA
2014	S2	3218	3218	Intervention	2	NA	0	36	0	0	NA	0	0	1	F	5	Negative	8/11/2012	NA	0	1	1	2950	NA	115.75	NA	NA	45	50.25	237.75	116.5	122.25	209.5	49	NA	131.75	NA	NA	NA	NA	NA
2014	S2	3218	3218	Intervention	2	NA	0	36	0	0	NA	1	0	1	M	6	Negative	8/11/2012	NA	0	1	1	2806	NA	88.5	NA	NA	77	53.25	700.5	109.5	147.5	329.75	46.5	48	306.5	430	NA	NA	NA	NA
2014	S2	3218	3218	Intervention	2	32.9	1	36	0	0	NA	1	1	1	M	17	Positive	8/11/2012	PfPv	2	1	0	2536	399.5	2193.5	852	1642.75	5413.5	353	NA	NA	947.25	5460	415.75	NA	785.5	6751.75	NA	341.5	NA	NA
2014	S2	3218	3218	Intervention	2	NA	1	37	0	0	NA	1	0	1	M	7	Negative	8/11/2012	NA	0	1	1	3048	NA	NA	NA	537.25	251	NA	169	NA	818	115.5	67.5	NA	288.75	1005.25	312	NA	NA	NA
2014	S2	3218	3218	Intervention	2	NA	1	36.5	0	0	NA	1	0	1	F	2	Negative	8/11/2012	NA	0	2	1	2803	37.25	57	53	NA	80.25	54.5	62	77	47.75	77	42.25	56	82.5	207	284.75	75	NA	NA
2014	S2	3218	3218	Intervention	2	NA	0	36	1	NA	NA	0	0	1	F	30	Negative	8/11/2012	NA	0	1	1	2787	969	NA	1911.5	NA	1220.25	NA	14467.5	NA	6088.75	9022.25	726.25	128.5	568	NA	1188	NA	NA	NA
2014	S2	3218	3218	Intervention	2	NA	1	36	1	NA	NA	1	1	1	M	34	Positive	8/11/2012	Pv	1	1	0	2627	NA	744.5	NA	NA	169.5	NA	11924	NA	4524.75	NA	144	136.5	NA	NA	NA	NA	NA	NA
2014	S2	3218	3218	Intervention	2	NA	1	37	1	NA	NA	1	0	1	F	4	Negative	8/11/2012	NA	0	1	1	3469	NA	NA	NA	NA	42.5	47.5	353.75	NA	308	350	52.5	52	NA	NA	NA	NA	NA	NA
2014	S2	3218	3218	Intervention	2	NA	1	36	1	NA	NA	1	1	1	F	35	Positive	8/11/2012	PfPv	2	1	0	2611	503	558	2246	NA	169	NA	6291.75	NA	2193.5	4355.25	144.5	102.75	356.75	NA	NA	420.25	NA	NA
2014	S2	3218	3218	Intervention	2	NA	0	37	0	0	NA	0	0	1	F	12	Negative	8/11/2012	NA	0	1	1	2998	NA	NA	NA	NA	NA	NA	NA	NA	NA	NA	NA	NA	265.25	NA	NA	NA	NA	NA
2014	S2	3218	3218	Intervention	2	NA	0	35	1	NA	NA	0	0	1	M	10	Negative	8/11/2012	NA	0	3	1	3197	30	50.5	43	52	245	54.5	58.75	67.75	44	134.25	34.5	35	89	168.5	98.25	44	73.5	53.5
2014	S2	3218	3218	Intervention	2	NA	1	37	0	0	NA	1	1	1	F	11	Negative	8/11/2012	NA	0	1	1	2867	NA	270.5	5479.75	NA	1773	1287.25	2312.25	NA	595	504	42.25	NA	385	NA	NA	NA	NA	NA
2014	S2	3218	3218	Intervention	2	NA	1	37	0	0	NA	1	1	1	M	6	Negative	8/11/2012	NA	0	2	1	2926	NA	139.5	1180	435.75	587.75	57	381	NA	1463.5	4156.25	61	63	326.25	420.25	NA	NA	NA	NA
2014	S2	3218	3218	Intervention	2	38	1	37	0	0	NA	1	1	1	F	5	Positive	8/11/2012	Pv	1	1	1	2929	NA	NA	NA	NA	NA	NA	106	NA	117.5	NA	NA	94.5	354.25	658.25	296.75	NA	NA	NA
2014	S2	3218	3218	Intervention	2	39.8	1	36.4	0	0	NA	0	0	3	M	15	Positive	8/11/2012	Pv	1	1	1	2696	NA	497	NA	NA	1066	248.75	NA	NA	2047.5	NA	119.75	NA	NA	810	NA	NA	NA	NA
2014	S2	3218	3218	Intervention	2	34.4	0	36	0	0	NA	1	0	1	M	21	Positive	8/11/2012	Pv	1	1	1	2918	247.75	298.25	NA	NA	1831.75	NA	1095	NA	729.5	2017.5	NA	167.25	407	1698.25	1110.5	756	NA	NA
2014	S2	3218	3218	Intervention	1	NA	0	36	0	1	NA	1	0	1	F	20	Negative	8/11/2012	NA	0	1	1	3270	160.5	NA	NA	NA	44	45.25	59.5	NA	46	65.5	111	59	162	230.5	NA	NA	NA	NA
2014	S2	3218	3218	Intervention	1	NA	0	36	0	0	NA	0	0	1	F	45	Negative	8/11/2012	NA	0	1	1	2883	NA	80.5	NA	NA	55	61	127	NA	66	86.25	81.5	67.75	NA	NA	NA	NA	NA	NA
2014	S2	3221	3221	Intervention	2	NA	0	37	1	1	NA	1	0	1	F	29	Negative	8/11/2012	NA	0	2	1	3036	103	NA	407.25	NA	792.75	NA	4722.5	196.25	1234	3032.75	89.5	177	NA	NA	NA	698.5	NA	NA
2014	S2	3221	3221	Intervention	2	NA	0	36.5	0	1	NA	1	0	1	F	2	Negative	8/11/2012	NA	0	1	1	2849	34.5	NA	NA	NA	35.5	47	49.5	NA	40.25	47.5	41.5	42	110.5	NA	NA	NA	NA	NA
2014	S2	3221	3221	Intervention	2	NA	0	37	0	1	NA	0	0	1	M	3	Negative	8/11/2012	NA	0	1	1	3146	33	46.5	NA	NA	34.75	41	45.5	NA	38.5	NA	36.5	40.75	101.5	NA	NA	NA	NA	NA
2014	S2	3221	3221	Intervention	2	NA	0	36.5	1	1	NA	0	0	1	F	7	Negative	8/11/2012	NA	0	1	1	3154	NA	NA	NA	NA	NA	NA	NA	NA	NA	NA	NA	NA	769.75	654.25	NA	NA	NA	NA
2014	S2	3221	3221	Intervention	2	NA	0	37	1	1	NA	1	0	1	F	48	Negative	8/11/2012	NA	0	1	1	2891	1169.75	NA	1099.25	NA	153	65.25	1498.25	NA	1495.75	4256.75	908	1095.75	NA	1030	NA	332.25	NA	NA
2014	S2	3221	3221	Intervention	2	NA	0	36.5	1	1	NA	0	0	1	M	60	Negative	8/11/2012	NA	0	1	1	2564	1685.75	NA	NA	NA	1883	NA	1718	NA	528	1665	1638	NA	638.5	1319.25	NA	NA	NA	NA
2014	S2	3221	3221	Intervention	2	NA	0	36.5	1	1	NA	1	0	1	F	38	Negative	8/11/2012	NA	0	1	1	2844	655.25	NA	NA	NA	924	109	5872	NA	437.5	1021	527	429.75	349.5	NA	NA	NA	NA	NA
2014	S2	3221	3221	Intervention	2	NA	0	37	1	1	NA	1	0	1	F	50	Negative	8/11/2012	NA	0	1	1	2498	1532	NA	NA	NA	229.25	NA	1286.5	NA	NA	692.5	433.75	419.5	355.5	NA	NA	NA	NA	NA
2014	S2	3221	3221	Intervention	3	NA	0	37	1	1	NA	1	0	1	M	30	Negative	8/11/2012	NA	0	1	1	2473	65.5	78	668.5	745.5	5578	475.75	5546.25	NA	2471	2827.25	169.5	48	322.5	442	NA	NA	NA	NA
2014	S2	3221	3221	Intervention	3	NA	0	37	1	1	NA	1	0	1	F	23	Negative	8/11/2012	NA	0	1	1	2743	127.25	NA	NA	NA	85.5	83.5	291.25	NA	114	1170	86.5	493.5	307	NA	NA	1617	NA	NA
2014	S2	3221	3221	Intervention	2	NA	0	36.5	1	1	NA	0	0	1	F	10	Negative	8/11/2012	NA	0	1	1	3133	30	38	35.5	NA	31.5	39.5	37	45.75	35.5	37.75	35	34.5	87	NA	58	45.5	NA	NA
2014	S2	3221	3221	Intervention	2	NA	0	37	1	1	NA	0	0	1	M	30	Negative	8/11/2012	NA	0	2	1	3242	130.75	355.5	NA	NA	140	44	528.25	69	65	1899	405.5	110.5	195.5	155	NA	234.5	NA	NA
2014	S2	3221	3221	Intervention	2	NA	0	36.5	1	1	NA	0	0	1	F	45	Negative	8/11/2012	NA	0	1	1	2893	882.75	50	149.5	169.25	108	55	NA	82.25	987.75	1776.5	221	455.75	365	293	71.5	193.25	NA	NA
2014	S2	3221	3221	Intervention	2	NA	0	36.5	1	1	NA	1	0	1	F	5	Negative	8/11/2012	NA	0	1	1	3229	48	NA	NA	NA	41	51.25	NA	NA	55	NA	47.25	52	389.75	374	NA	NA	NA	NA
2014	S2	3221	3221	Intervention	2	NA	0	37.2	1	1	NA	0	0	1	M	14	Negative	8/11/2012	NA	0	1	1	2945	NA	NA	NA	NA	149.5	56	116.5	NA	124.5	NA	80.5	59.5	NA	NA	NA	NA	NA	NA
2014	S2	3221	3221	Intervention	2	NA	0	37	1	1	NA	0	0	1	M	20	Negative	8/11/2012	NA	0	1	1	2365	NA	NA	NA	NA	68	NA	NA	NA	254.25	273	NA	189.75	NA	NA	NA	630.75	NA	NA
2014	S2	3221	3221	Intervention	2	NA	0	36.5	1	1	NA	1	0	1	F	10	Negative	8/11/2012	NA	0	1	1	2925	NA	NA	NA	NA	NA	NA	NA	NA	NA	NA	NA	NA	NA	NA	NA	NA	NA	NA
2014	S2	3221	3221	Intervention	2	NA	0	37	1	1	NA	1	0	1	F	6	Negative	8/11/2012	NA	0	1	1	2767	NA	NA	NA	445.75	NA	NA	NA	NA	NA	NA	NA	60.5	NA	NA	NA	NA	NA	NA
2014	S2	3221	3221	Intervention	3	NA	0	37	1	1	NA	1	0	1	M	55	Negative	8/11/2012	NA	0	1	1	2857	1350	NA	531	388.75	265.25	76	9248.75	203.25	1692.5	1752.5	246	NA	207.75	NA	NA	NA	NA	NA
2014	S2	3221	3221	Intervention	2	NA	0	36.5	1	1	NA	1	0	1	M	5	Negative	8/11/2012	NA	0	1	1	3263	44	42.75	46.5	NA	230.5	107.75	238.75	62.25	57	79.5	37.5	38.5	112	122.75	95	73.25	NA	NA
2014	S2	3221	3221	Intervention	3	NA	0	37	1	1	NA	1	0	1	M	25	Negative	8/11/2012	NA	0	1	1	2969	1607.5	265	NA	952.75	657.75	72.5	9662.5	200.75	929.5	3934.25	251	312.5	305.25	4487.25	784	NA	NA	NA
2014	S2	3221	3221	Intervention	3	NA	0	37	1	1	NA	1	0	1	F	30	Negative	8/11/2012	NA	0	1	1	2883	1566.25	219	335.75	474	877.5	129.25	14949.5	273	3207.25	3490.75	87.25	1987.25	806.5	674	238.75	500.75	279.25	268.25
2014	S2	3221	3221	Intervention	1	NA	0	36.5	1	1	NA	1	0	1	F	7	Negative	8/11/2012	NA	0	1	1	3149	301	NA	NA	439.5	801.5	162.5	180.5	265	144	126.5	92	107.5	421.75	658.75	254	NA	331	328
2014	S2	3221	3221	Intervention	1	NA	0	37	1	1	NA	0	0	1	F	50	Negative	8/11/2012	NA	0	1	1	3027	NA	NA	NA	572.25	NA	NA	NA	300	NA	445.5	NA	NA	1479	775.5	291.5	NA	367.75	355.5
2014	S2	3221	3221	Intervention	3	NA	0	37	1	1	NA	1	0	1	F	70	Negative	8/11/2012	NA	0	1	1	3129	873.25	151	193.5	489.75	237.75	120.75	2483.25	268.25	220.25	281.75	370.75	162	355.75	624.25	278.5	292.5	334.5	330.5
2014	S2	3221	3221	Intervention	3	NA	0	36.5	1	1	NA	1	0	1	F	8	Positive	8/11/2012	Pv	1	1	1	2832	87.25	110	128.25	372.5	119.5	104	140.25	189.75	108.5	101.25	73.5	76.75	233.5	549.25	211.5	176.5	229	236
2014	S2	3221	3221	Intervention	1	NA	0	37	1	1	NA	1	0	1	M	38	Negative	8/11/2012	NA	0	1	1	2691	238.25	124.25	779.75	600.5	3464	141	5889.75	349.75	4640	5658	140.25	84.5	434.5	858.5	262	372.5	494	317.5
2014	S2	3221	3221	Intervention	3	NA	0	37	1	1	NA	0	0	1	F	78	Negative	8/11/2012	NA	0	1	1	2576	2159.25	747.5	174.25	623.25	5081	115.75	15081.75	290	1223	2342.25	1075.75	668.5	951	935.25	498	958.75	272.5	247.5
2014	S2	3221	3221	Intervention	3	NA	0	37	1	1	NA	1	0	1	F	12	Negative	8/11/2012	NA	0	1	1	2835	88.75	112	137.5	355.5	93.5	96.5	101.75	187.5	124	102	95	111.5	487.75	693.5	236.5	209.75	271	252.25
2014	S2	3221	3221	Intervention	3	NA	0	37	1	1	NA	1	0	1	M	70	Negative	8/11/2012	NA	0	1	1	2771	NA	NA	1169.75	NA	580.5	122.25	1734	NA	1189.5	NA	1205.75	318.75	1313.75	780	NA	600.25	304.75	287.5
2014	S2	3221	3221	Intervention	3	NA	0	37	1	1	NA	1	0	1	M	71	Negative	8/11/2012	NA	0	5	1	3435	357.5	226	446.75	563.25	409.75	115.25	192	413.5	505.5	2462.5	212	146.5	392	577.75	311.25	204.75	294.5	345.5
2014	S2	3221	3221	Intervention	3	NA	0	36.5	1	1	NA	1	0	2	F	2	Negative	8/11/2012	NA	0	1	1	2801	82.5	96.25	108	342.5	64.75	78.5	156.25	167	130.5	218.25	64.5	65	373.5	427	156.75	145.75	191	182.5
2014	S2	3221	3221	Intervention	NA	NA	NA	NA	NA	NA	NA	NA	NA	NA	NA	NA	Negative	8/11/2012	NA	0	2	1	2746	185	174	741	512	4412.25	211	1121.75	292.5	2659.5	5772.5	109	135.5	324	657	317.5	332.5	381	380.5
2014	S2	3221	3221	Intervention	3	NA	0	37	1	1	NA	1	0	1	F	33	Negative	8/11/2012	NA	0	1	1	2809	845.25	158	192.25	1497.5	191.75	135.5	2211.5	226	388	1279.25	2025.75	388.75	903.5	502.5	223.75	327	325.5	302.75
2014	S2	3221	3221	Intervention	3	NA	0	36.5	1	1	NA	1	0	1	M	3	Negative	8/11/2012	NA	0	3	1	2808	24.5	30.5	29.5	37.5	32.25	30.75	32	35	30	34.5	28.25	33	46	139	42.5	38	48.5	37.5
2014	S2	3221	3221	Intervention	3	NA	0	37	0	1	NA	1	0	1	F	20	Negative	8/11/2012	NA	0	1	1	3050	122	107.5	133	408.5	175.5	109	1503.75	217	177.5	1945.25	143	85	274.25	386.5	191.25	218.75	228.75	198.5
2014	S2	3221	3221	Intervention	3	NA	0	37	1	1	NA	1	0	1	M	48	Negative	8/11/2012	NA	0	1	1	3116	239.5	125.5	138	407.25	170.5	94.25	168.5	215	127	126.5	180	139.25	348.75	491	219	272.75	319	326.5
2014	S2	3221	3221	Intervention	3	38.4	0	36.5	1	1	NA	1	0	1	M	10	Positive	8/11/2012	Pf	1	1	1	2814	91	126	121.5	409.5	530.75	133.5	240.5	195.25	1860	5395.5	72.5	77.75	234.5	530.5	214.25	181.25	264	218.5
2014	S2	3221	3221	Intervention	3	NA	0	36.5	1	1	NA	1	0	1	M	9	Negative	8/11/2012	NA	0	2	1	2926	64.5	89.75	93.5	285.5	72	70.25	71.25	148.25	85.5	289.75	60	61.25	735	811.25	162.75	133.5	197.75	186
2014	S2	3221	3221	Intervention	3	NA	0	36.5	1	1	NA	1	0	1	M	7	Negative	8/11/2012	NA	0	1	1	3015	54.5	67	76.25	207.75	46.5	56.75	81.75	120	64	62	44.75	56.5	206.75	281.5	111.25	99	143.75	131
2014	S2	3223	3223	Control	3	NA	0	36.5	0	0	NA	0	0	1	M	7	Negative	11/11/2012	NA	0	3	1	3216	45	118.5	74	126.5	52.5	55.5	51	106.5	42	75.5	53.5	57.5	158.5	224	114.75	95.5	314	109.5
2014	S2	3223	3223	Control	3	NA	0	37	0	0	NA	0	0	1	F	18	Negative	11/11/2012	NA	0	3	1	3167	65.5	65	63.5	161.75	799.5	55.5	316	88.5	131	251.5	48	51	193.5	264.25	90.25	118	271	106.75
2014	S2	3223	3223	Control	3	NA	0	37	0	0	NA	1	0	1	F	20	Negative	11/11/2012	NA	0	1	1	2931	74	73.75	107.75	466	812	82.5	58	119	81	374.5	57	57	165	293	138.25	192.5	168	158.75
2014	S2	3223	3223	Control	3	NA	0	37	0	0	NA	0	0	1	M	15	Negative	11/11/2012	NA	0	1	1	2633	152.5	134.5	369.5	556.75	3419.25	586.75	1766	336.25	4507.25	5729.5	78	87.5	298.5	504	225.75	297.75	398.5	256.5
2014	S2	3223	3223	Control	3	NA	0	37	0	0	NA	0	0	1	M	34	Negative	11/11/2012	NA	0	1	1	2801	709.5	201.75	183.75	691	659	195.5	810	310	1617.75	2270.5	154.25	165	405.25	605	277.25	13660.75	540.75	333.5
2014	S2	3223	3223	Control	3	NA	0	37	0	0	NA	1	0	1	F	8	Negative	11/11/2012	NA	0	1	1	2670	97	99.75	99	459.75	589.5	224	299.75	172.75	107	144	63.25	104.75	493.75	942	171.25	223.5	371	259
2014	S2	3223	3223	Control	3	NA	0	36.5	0	0	NA	1	0	1	M	9	Negative	11/11/2012	NA	0	1	1	2844	878.75	160.5	164.75	536.75	160.75	141.75	194.75	319.5	636.5	988.5	109	124	703.25	935.75	265.75	334.5	497.5	380.5
2014	S2	3223	3223	Control	3	NA	0	37	0	0	NA	1	1	1	M	29	Negative	11/11/2012	NA	0	1	1	2380	998.25	94.75	6637	659.25	1066.75	89.75	14897.5	252.5	2541	5209	309.25	248.75	444.25	512	149.5	502.25	199	169.25
2014	S2	3223	3223	Control	3	NA	0	37	0	0	NA	1	0	1	F	23	Negative	11/11/2012	NA	0	1	1	2824	759.5	1066.25	151.75	476.5	2012.5	163.5	10002.5	158.5	1115.5	1594.5	241.75	329	321.5	325	316.25	216.25	365.25	212.5
2014	S2	3223	3223	Control	3	NA	0	36.5	0	0	NA	0	0	1	M	6	Negative	11/11/2012	NA	0	1	1	3122	54.5	64.5	61.5	549.5	1976.5	65	245.5	84	62	102.75	47	47	131.75	202	98	82	113.5	108
2014	S2	3223	3223	Control	3	NA	0	37	0	0	NA	1	0	1	F	18	Negative	11/11/2012	NA	0	2	1	2648	223.75	176	222.5	410.75	147.75	66	6202.5	324	6860.25	18640.25	64	73.5	204.5	290.5	142.5	207.5	167.75	157.75
2014	S2	3223	3223	Control	1	NA	0	37	0	0	NA	0	0	1	M	9	Negative	11/11/2012	NA	0	2	1	2342	54	238.5	73.25	203.5	50.5	59	103.5	158.75	86	217	49.5	108.5	139.5	211.5	115.25	108	139.25	132.5
2014	S2	3223	3223	Control	1	NA	0	37	0	0	NA	1	0	1	M	20	Negative	11/11/2012	NA	0	1	1	2352	189.5	5429.5	11038	4711.75	15497.5	5327.5	21801.5	500	10004.5	16784.5	85.75	124.5	1292	1492.5	445.5	417.75	398.5	305.5
2014	S2	3223	3223	Control	3	NA	0	37	0	0	NA	0	0	1	M	20	Negative	11/11/2012	NA	0	1	1	2454	522.5	432.75	1559.25	661	587.25	435	2568.25	224	3310.5	3526.75	402	202	389	768.5	162	889.5	193.25	231.5
2014	S2	3223	3223	Control	3	NA	0	37	0	0	NA	1	0	1	M	15	Negative	11/11/2012	NA	0	1	1	3008	430	187.25	610.75	453	7589.5	197.25	194	218.75	298.75	2109	591.5	158.75	559.25	652	205.25	311.25	253	287.5
2014	S2	3223	3223	Control	3	NA	1	37	0	0	NA	1	0	1	M	7	Negative	11/11/2012	NA	0	1	1	2879	45	56	71	143.75	100.75	49.5	66	79.75	52.5	92	43.25	44.75	100.25	160.5	92.75	79.5	114.25	98
2014	S2	3223	3223	Control	1	NA	0	37	0	0	NA	1	0	1	M	12	Negative	11/11/2012	NA	0	1	1	2881	403.25	129	163.75	466	213	149.5	193.5	219.25	157.25	377.5	112.25	93.75	1000.75	2072.75	256.75	269.75	312.75	273.25
2014	S2	3223	3223	Control	3	NA	1	36.5	0	0	NA	1	0	1	M	10	Negative	11/11/2012	NA	0	1	1	2994	66.5	90.75	98.75	275.75	282.5	180.25	105	136.75	79.5	134	61	96	313.75	457	159	144.75	201.75	177.25
2014	S2	3223	3223	Control	1	NA	0	37	0	0	NA	0	0	2	F	31	Negative	11/11/2012	NA	0	1	1	2909	62.5	75	84.75	250.5	133.75	75.75	864	141.75	610.5	1598	62.5	86.5	247.75	367.25	135.5	148.5	151.5	151.25
2014	S2	3223	3223	Control	3	NA	0	37	0	0	NA	0	0	1	M	12	Negative	11/11/2012	NA	0	1	1	3184	70.5	97	90	298.75	62.25	74.5	231.25	158	161.5	209.25	69.75	74.75	255.5	362.25	160.5	125.5	156.75	177.5
2014	S2	3223	3223	Control	3	NA	0	37	0	0	NA	1	0	1	F	20	Negative	11/11/2012	NA	0	1	1	2826	103.75	162.5	1536.5	318.75	61.75	54.25	1486	133.5	559.75	1022	47	120.5	418.5	416.5	114	640.75	125.75	133
2014	S2	3223	3223	Control	2	NA	0	37	0	0	NA	0	0	1	M	11	Negative	11/11/2012	NA	0	1	1	2746	62.5	96.5	110.5	290.75	75	78.5	363	147.5	149.75	277	60	1224.5	163.5	317	156	222.25	235.5	183
2014	S2	3223	3223	Control	3	NA	0	36.5	0	0	NA	0	0	1	M	4	Negative	11/11/2012	NA	0	1	1	2342	71.75	106.5	115.75	310.5	107.75	95.5	79	171	94.5	159.25	64.75	92	269.5	392.25	172.5	177.5	240	211.5
2014	S2	3223	3223	Control	1	NA	0	37	0	0	NA	0	0	1	M	19	Negative	11/11/2012	NA	0	1	1	2825	65.5	98.5	110.25	295.75	63.5	78	67.5	160.25	72.75	133	63.5	69.5	598	1633.5	178.5	143	206.25	185.5
2014	S2	3223	3223	Control	3	NA	0	37	0	0	NA	0	0	1	F	36	Negative	11/11/2012	NA	0	1	1	2666	822.75	159.75	881	615.75	3698.75	128.75	897.5	184	2761.5	4669.75	302.5	104	277.25	734.75	159.5	450	198.5	158.75
2014	S2	3223	3223	Control	1	NA	0	37	0	0	NA	0	0	1	M	14	Negative	11/11/2012	NA	0	1	1	2062	80.75	85.5	100.5	426	139	70.5	80.5	137	88.25	371.25	62	64.75	237.5	328.5	159	134.75	215	180.5
2014	S2	3223	3223	Control	3	NA	0	36.5	0	0	NA	1	0	1	F	15	Negative	11/11/2012	NA	0	3	0	2817	155	41	318.75	71.75	NA	154.25	2724	76	404	1962.5	38.25	38.75	143	163	63.5	48.5	52.5	65
2014	S2	3223	3223	Control	1	NA	0	37	0	0	NA	0	0	1	M	14	Negative	11/11/2012	NA	0	1	1	2263	137.75	136.75	158	459.25	714.5	289	NA	223.75	NA	143.25	83.5	86	486.75	621	333.25	286.25	467.5	322
2014	S2	3223	3223	Control	3	NA	0	37	0	0	NA	1	0	1	M	15	Negative	11/11/2012	NA	0	1	1	2946	516.75	281.25	2279.5	330.25	609.5	501.5	1441.5	176.75	1673	2647.5	67	196	205.5	337.5	156	247.5	213.5	192
2014	S2	3223	3223	Control	3	NA	0	37	0	0	NA	1	0	1	M	12	Negative	11/11/2012	NA	0	1	1	2553	177.5	1434.75	815.5	2097.75	889	321.5	27994.5	455.75	16442.5	26200.75	129	126	652.75	1558.5	435	443.5	708	529.75
2014	S2	3223	3223	Control	3	NA	0	37	0	0	NA	1	0	1	M	3	Negative	11/11/2012	NA	0	1	1	2689	357	82	287.5	262	197.75	64.5	399.5	149.25	5701	239.5	51.5	78	347.75	538.25	132.75	143.25	182.25	150.75
2014	S2	3223	3223	Control	1	NA	0	37	0	0	NA	0	0	1	F	12	Negative	11/11/2012	NA	0	1	1	2694	67.5	76	271.5	219.75	66	63.75	181	114.5	128.5	320	51.5	55	473	510	133.5	215.75	154.5	145.5
2014	S2	3223	3223	Control	1	NA	0	37	0	0	NA	0	0	1	M	9	Negative	11/11/2012	NA	0	1	1	2610	63.5	82	89	249.5	333.5	240	126	132	773.75	216	62.75	62.25	600.25	572.75	143	144.75	206.5	167.75
2014	S2	3223	3223	Control	1	NA	0	37	0	0	NA	0	0	1	M	6	Negative	11/11/2012	NA	0	1	1	3058	91.75	130.5	146.5	382	107.25	122	102.25	203.5	125.75	165	79.25	109.5	280.25	422	212.75	197	335.5	256.75
2014	S2	3223	3223	Control	1	NA	0	36.5	0	0	NA	0	0	1	F	7	Negative	11/11/2012	NA	0	3	0	3338	34	36.25	39	48	32.5	34.5	38.5	46	31.75	240.5	35	37	90.5	92	56.25	41	47	46.5
2014	S2	3224	3224	Control	3	NA	0	35.9	0	0	NA	1	0	1	M	50	Negative	11/11/2012	NA	0	2	1	2709	706.5	162.5	2426.5	499	179	71.5	9751.5	197.75	3263	6394.5	623.75	433	395	562.5	103	147.25	156	119.25
2014	S2	3224	3224	Control	3	NA	1	36.8	0	0	NA	1	0	1	M	6	Negative	11/11/2012	NA	0	2	1	3127	56	68.5	81.25	219.25	770.25	454	61.75	110.5	69.75	60.5	49	55	133.25	294	124.5	118.5	162.25	146.5
2014	S2	3224	3224	Control	3	NA	1	36.5	0	0	NA	1	0	1	F	3	Negative	11/11/2012	NA	0	3	1	3490	27	40	36.5	51	33	35	NA	62.5	29	33	30.5	34	102.25	151.25	52.75	40.5	60	48.5
2014	S2	3224	3224	Control	3	NA	0	36.7	0	0	NA	0	0	1	M	52	Negative	11/11/2012	NA	0	1	1	2762	1524	64	79.75	1957.5	5507	79.5	5665.5	137.25	1875.75	2991	432	79.5	390	319	791.25	231.25	124.75	135.5
2014	S2	3224	3224	Control	3	NA	1	36.1	0	0	NA	0	0	1	F	2	Negative	11/11/2012	NA	0	3	1	3341	24.5	32	45.5	35.5	27	48.5	25.5	34.5	25.25	29	29	29.5	42	52.5	43.25	34	42.75	39.5
2014	S2	3224	3224	Control	3	NA	0	37	0	0	NA	1	0	2	M	20	Negative	11/11/2012	NA	0	1	1	1805	84	99.25	92.25	326	261.25	98.25	1739	179.25	285.25	416	56	66.75	217.75	418.75	156.5	350.5	244.5	189.5
2014	S2	3224	3224	Control	3	NA	0	36.8	0	0	NA	0	0	1	F	30	Negative	11/11/2012	NA	0	1	1	2825	219	168	1563	307	202	189.25	2900	159.5	1125.5	1445.25	54	62.5	165.5	326.5	127.75	471.75	152.25	149.5
2014	S2	3224	3224	Control	3	NA	0	36.5	0	0	NA	1	0	1	F	6	Negative	11/11/2012	NA	0	1	1	2831	48	69	72	199.25	65.5	65.25	54.5	100.5	59.75	57.5	46	49.5	109.5	205.5	110.25	103.25	141.5	126.5
2014	S2	3224	3224	Control	3	NA	0	36.4	0	0	NA	1	0	1	F	2	Negative	11/11/2012	NA	0	1	1	2690	140	109	116.75	330.25	73	88.25	79.5	171.5	109.25	91.25	67	69.5	177.5	344.5	189.25	178	279.25	224
2014	S2	3224	3224	Control	3	NA	0	36.7	0	0	NA	1	0	1	M	18	Negative	11/11/2012	NA	0	1	1	2718	122.25	261	1347	537	8368.25	138	686.75	274	1424.5	2127	87	101.5	462.75	637.75	398.5	402	371.25	328
2014	S2	3224	3224	Control	3	NA	1	37.3	0	0	NA	0	0	1	M	11	Negative	11/11/2012	NA	0	1	1	3024	27	37	42	152.5	384	212.5	194.75	176.5	51.25	137.5	33.5	35	93	131.25	63.5	60.75	78	77.75
2014	S2	3224	3224	Control	3	NA	0	37.1	0	0	NA	1	0	1	F	41	Negative	11/11/2012	NA	0	1	1	2665	1433.5	118.75	3234	851.25	2318	102.75	7345.5	213.5	1416.5	1667.75	359.25	523.5	578.5	488.25	176.5	720.5	254.25	221.75
2014	S2	3224	3224	Control	3	NA	0	36.4	0	0	NA	1	0	1	F	10	Negative	11/11/2012	NA	0	1	1	2970	64	81.5	91.5	276.25	375.25	284.25	108.5	142	173.5	362	55.5	74	359.25	378	136.75	134.5	170.25	164
2014	S2	3224	3224	Control	3	NA	1	36.1	0	0	NA	1	0	1	M	8	Negative	11/11/2012	NA	0	2	1	2823	39	53.5	67.5	158.75	142.75	45.75	51.75	85.25	2747	672.25	38.25	49.25	175	228	92.75	81	110	98.75
2014	S2	3224	3224	Control	6	NA	0	37.1	0	0	NA	0	0	1	F	9	Negative	11/11/2012	NA	0	1	1	2652	84	113	132.5	391	77	95.5	84.5	209.5	92	84	77.25	81.75	208.5	367.25	206.75	195.75	288.5	225
2014	S2	3224	3224	Control	3	NA	0	36.8	0	0	NA	0	0	1	M	15	Negative	11/11/2012	NA	0	1	1	1472	2325.5	110.25	142.75	233.5	433	115.5	424	114	396.75	447.25	54.25	55.25	253	311.75	120	205.5	188.5	157.5
2014	S2	3224	3224	Control	3	NA	0	37	0	0	NA	1	0	1	M	50	Negative	11/11/2012	NA	0	1	1	2780	2024.75	3362.5	214.5	2548.5	515.75	121	24743.25	561.5	2707	11633	665.25	1420.5	722.75	814.25	260.5	604.5	415.25	356
2014	S2	3224	3224	Control	3	NA	0	35.8	0	0	NA	1	1	1	M	40	Negative	11/11/2012	NA	0	3	0	2318	3159	109.75	8981.5	1884.25	NA	311.5	10772.75	155.75	1400.5	3768.5	169	90.75	248.5	3534.5	184.75	79.75	95.5	79.75
2014	S2	3224	3224	Control	3	NA	1	36.2	0	0	NA	1	0	1	F	7	Negative	11/11/2012	NA	0	1	1	2887	83	104	1847.5	395.5	231	90	305.75	182	194	723.75	77.25	79.75	212.75	384	200.25	224.5	273	236.5
2014	S2	3224	3224	Control	3	NA	0	37.5	0	0	NA	1	0	1	M	17	Negative	11/11/2012	NA	0	1	1	2518	1204.75	100.25	2828.5	652.25	590.25	149.75	12879.25	285	5158.25	5903.75	297.5	275.25	475.25	1114.5	1163.5	402.75	163.5	149.75
2014	S2	3224	3224	Control	3	NA	0	36.4	0	0	NA	0	0	1	M	17	Negative	11/11/2012	NA	0	1	1	2783	70.75	96.5	618.75	359.25	76.25	84.25	232.75	154.75	102.5	78	60.25	70	284	332.25	182	210.5	344.75	238.5
2014	S2	3224	3224	Control	3	NA	0	36.5	0	0	NA	0	0	1	M	13	Negative	11/11/2012	NA	0	1	1	2701	164.75	339	185	674	191.25	154.25	2293.5	319.75	801.75	1090	111.25	113	893	982	280.5	369	581	381.5
2014	S2	3224	3224	Control	3	NA	1	35.7	0	0	NA	1	1	1	M	70	Negative	11/11/2012	NA	0	1	1	2641	840.5	570.75	374	1296	2664.5	71.75	1451.75	150	1084.75	1725.5	1841.25	197	644.25	322.75	122.25	221.25	150	150
2014	S2	3224	3224	Control	3	41.4	1	36.2	0	0	NA	1	0	1	F	27	Positive	11/11/2012	Pm	1	1	1	2614	539.75	154.5	576	299.75	776.75	72.5	1537.5	162.75	616.25	3839	224	102.5	230	263.25	134.75	784	200.25	169.25
2014	S2	3224	3224	Control	3	NA	0	37.2	0	0	NA	1	0	1	F	51	Negative	11/11/2012	NA	0	1	1	2137	1948.75	162.25	3610.75	5578.25	719.25	135.25	20963	792.75	4843.75	5301	754	1246	1135.5	12405.75	488.5	950	467.75	394.75
2014	S2	3224	3224	Control	3	NA	0	36.7	0	0	NA	1	0	1	M	19	Negative	11/11/2012	NA	0	2	1	3026	198	84.75	187.25	471.75	1644.5	133	4136.25	238	1986.75	2340.75	58.5	71.5	222.5	975	168	169.5	283.5	185
2014	S2	3224	3224	Control	3	38.6	1	36.1	0	1	NA	1	0	3	M	17	Positive	11/11/2012	Pv	1	2	0	2958	87.25	152	461	336.25	532.25	74	308.75	172.25	646	982	62.25	69	194.75	359.5	177.5	166	232.5	185.75
2014	S2	3224	3224	Control	3	NA	0	36.6	0	0	NA	1	0	1	F	6	Negative	11/11/2012	NA	0	1	1	2839	57.5	82	93	273	66.5	64.5	80.75	142.75	104	226.5	57	60	161.5	392.25	157.5	141	207.5	175
2014	S2	3224	3224	Control	3	NA	0	37.2	0	0	NA	0	0	1	M	22	Negative	11/11/2012	NA	0	1	1	2953	152.5	243	290	293	439.5	204.25	291.25	148.25	934.5	970.75	125.5	126.5	281.25	356.75	165.5	343.75	257.75	203.25
2014	S2	3224	3224	Control	1	NA	0	36.9	0	0	NA	0	0	1	M	4	Negative	11/11/2012	NA	0	1	1	2867	42.5	153	61.5	167.5	40.5	47	50	88	52.75	93.5	43	42.5	106.5	239	100.75	85.75	121.5	105.25
2014	S2	3224	3224	Control	1	NA	0	37.1	0	0	NA	0	0	1	M	33	Negative	11/11/2012	NA	0	1	1	2689	123	174.5	198.5	601.75	104	128	163.75	300	154.75	150	102.25	108.5	669	885.75	334.5	343	640	379.5
2014	S2	3224	3224	Control	1	NA	0	37.1	0	0	NA	1	0	2	F	27	Negative	11/11/2012	NA	0	1	1	2829	51.5	72	79	245	62.5	84.5	59	101.5	121.25	100.5	56	52.75	162	302.5	117.25	123	161	153.5
2014	S2	3224	3224	Control	1	NA	0	36.5	0	0	NA	1	0	2	F	6	Negative	11/11/2012	NA	0	4	1	3374	35.5	36.75	36	94.25	35.5	43	42	43.75	1839.25	47.5	47	48	159	142.5	56.75	52.5	52	56.5
2014	S2	3224	3224	Control	1	NA	0	36.3	0	0	NA	1	0	1	F	10	Negative	11/11/2012	NA	0	1	1	2724	64	95	89.5	278.5	66	69.5	81.5	190	106	265.75	59.5	66	253.25	362.25	161.25	224.75	243	184
2014	S2	3224	3224	Control	1	NA	0	36.5	0	0	NA	0	0	1	F	25	Negative	11/11/2012	NA	0	1	1	2719	85	117	150.5	467	72.5	118.75	134.5	207.5	183.75	131	75	79	277.75	494.5	221.75	250.25	446.25	295.75
2014	S2	3224	3224	Control	3	NA	0	36.7	0	0	NA	1	0	1	F	40	Negative	11/11/2012	NA	0	1	1	2715	1053.25	344	415.5	1783.5	2800.75	331.5	21401.5	NA	3107.5	4274.75	994.25	823	1918	1729.5	710.5	899.25	1028	783.5
2014	S2	3224	3224	Control	1	NA	0	37.3	0	0	NA	1	0	2	M	18	Negative	11/11/2012	NA	0	1	1	3207	49.75	79.75	91	293.5	67	63.75	62	149	NA	NA	77.5	52.75	176.5	379.5	235.5	178.5	175.5	159
2014	S2	3224	3224	Control	1	NA	0	36.2	0	0	NA	0	0	1	F	3	Negative	11/11/2012	NA	0	1	1	3143	28.25	44.5	36	85.5	491	431.75	33	49.75	36.25	41	35	40.5	95.25	117.25	57.5	45.25	69	71.5
2014	S2	3224	3224	Control	1	NA	0	36.3	0	0	NA	0	0	1	M	40	Negative	11/11/2012	NA	0	1	1	3301	226.5	210	243.5	601.25	166.25	164.75	163.5	365.5	352.25	207.75	122	141	647.5	581.5	350.25	389.25	415	391.75
2014	S2	3225	3225	Control	2	NA	1	36.2	0	0	NA	0	0	1	F	4	Negative	11/11/2012	NA	0	1	1	3070	128.25	164.5	200	520.5	144.5	157.5	119	296.75	182.5	278	110.5	129	329.5	598.25	293.25	336.75	504.5	393.5
2014	S2	3225	3225	Control	2	NA	1	35.8	0	0	NA	1	0	1	F	45	Negative	11/11/2012	NA	0	1	1	2980	6117.75	184.75	2763.25	614.25	3047	294	1723.25	383.25	1475	1858.5	1260.75	318.75	1225.25	946.25	333.75	1180.5	396	390.75
2014	S2	3225	3225	Control	2	NA	1	36.5	0	0	NA	0	1	1	M	19	Negative	11/11/2012	NA	0	1	1	3257	198.5	214.5	642.5	590.5	181	163.5	251	359	376.25	378.25	126.5	131.25	381.5	612	359.75	365	423.5	410
2014	S2	3225	3225	Control	2	NA	1	36	0	0	NA	0	0	1	F	12	Negative	11/11/2012	NA	0	1	1	3188	140	171	249.5	536.25	120.25	137.5	NA	290.5	583.25	674.5	116.75	111.5	459.5	631	289.75	357.5	330.75	342
2014	S2	3225	3225	Control	2	NA	1	36.5	0	0	NA	1	0	1	F	12	Negative	11/11/2012	NA	0	1	1	3454	102	143.75	169	386.25	NA	114	108.5	221.5	275	526	93	102	395.5	520.5	275	215.5	304.25	278.75
2014	S2	3225	3225	Control	2	NA	1	36.4	0	0	NA	0	0	1	M	10	Negative	11/11/2012	NA	0	1	1	3339	72	99	147	305.5	74	89	69.5	167	91.75	98	69.5	77.5	205.25	296	181	145.75	201.75	197.5
2014	S2	3225	3225	Control	2	NA	1	36.8	0	0	NA	1	0	2	F	18	Negative	11/11/2012	NA	0	1	1	3467	NA	NA	NA	634.75	NA	NA	NA	NA	NA	NA	NA	NA	822.5	NA	NA	NA	464.5	443.5
2014	S2	3225	3225	Control	2	NA	1	36.8	0	0	NA	1	0	1	F	5	Negative	11/11/2012	NA	0	1	1	3452	106.5	95	106.5	256	448	239.25	68.75	140.75	80.5	96	63.5	129	232.5	303.5	157.75	400.5	179.25	172.5
2014	S2	3225	3225	Control	2	NA	0	36.6	0	0	NA	1	0	1	F	12	Negative	11/11/2012	NA	0	1	1	3383	180	239.5	569.75	795	19737	1583.5	1663.75	370	2208	3459.25	126.25	191	517.5	727.25	372.5	322.75	480.75	439.75
2014	S2	3225	3225	Control	2	NA	0	36.4	0	0	NA	1	0	1	F	7	Negative	11/11/2012	NA	0	1	1	3217	91	115	143.5	399.75	362	108	101	189.25	112	126	87.25	83	376.5	415.25	205.75	192	268	244.75
2014	S2	3225	3225	Control	2	NA	0	36.8	0	0	NA	1	0	1	F	14	Negative	11/11/2012	NA	0	1	1	3052	102	189	802.5	421.25	NA	106.5	3044	207	887	1108.75	97.5	96.75	323.75	470.5	220	209	255	261.75
2014	S2	3225	3225	Control	2	NA	0	35.9	0	0	NA	1	1	1	M	29	Negative	11/11/2012	NA	0	3	0	2590	427.5	1465.75	1114.5	270.5	12527.75	4539.5	1690.5	135	2875.25	5199.75	67.5	69.75	167.25	249.5	117.5	200.25	305.25	124
2014	S2	3225	3225	Control	2	NA	1	36.1	0	0	NA	1	0	1	F	35	Negative	11/11/2012	NA	0	1	1	3097	NA	415.5	NA	958.5	NA	200.5	NA	532	NA	NA	NA	NA	1879.5	2676.75	616.5	995	502	491
2014	S2	3225	3225	Control	2	NA	1	36.7	0	0	NA	0	0	1	F	32	Negative	11/11/2012	NA	0	2	0	2793	80	158.75	479.25	51	309	85	466.25	53	205	390.75	44	152.5	63.75	227.75	80.75	137.5	40.5	45.25
2014	S2	3225	3225	Control	2	NA	1	36.8	0	0	NA	0	0	1	M	8	Negative	11/11/2012	NA	0	1	1	3558	NA	130	169.75	373.5	NA	104.5	NA	212.75	126	118.5	103.5	95.5	420.5	510.75	218.25	182.75	282.5	254
2014	S2	3225	3225	Control	2	NA	1	36.4	0	0	NA	1	0	1	F	18	Negative	11/11/2012	NA	0	1	1	3237	114.5	135	148.5	410.5	NA	122.5	NA	219	NA	NA	84	NA	397.25	530	229.5	228.5	296.75	270
2014	S2	3225	3225	Control	2	NA	1	35.4	0	0	NA	0	0	1	M	5	Negative	11/11/2012	NA	0	3	1	2917	32.5	43.25	44.5	58.5	34.5	39.5	65.5	51.5	38.5	48	41.75	42.75	1013.5	881.5	62	52	61	58.5
2014	S2	3225	3225	Control	2	NA	1	36.9	0	0	NA	0	0	1	F	28	Negative	11/11/2012	NA	0	1	1	2912	440.5	785	6837	553.5	825.25	185.5	4415	339.75	1728.75	NA	NA	162	473.75	623	292.5	1129.5	463.25	361.75
2014	S2	3225	3225	Control	2	NA	0	36.5	0	0	NA	0	1	1	M	16	Negative	11/11/2012	NA	0	1	1	3261	NA	122.25	155.25	384.75	NA	113.25	NA	204.75	NA	NA	76	85.5	296	438.75	193	177.5	243.25	219.25
2014	S2	3225	3225	Control	2	NA	1	36.6	0	0	NA	1	0	1	F	9	Negative	11/11/2012	NA	0	1	1	3359	88.75	115.75	134.5	351	NA	111.25	96.5	213	127	NA	84.5	90.25	219	352	197.5	188.5	240.25	912.25
2014	S2	3225	3225	Control	2	NA	1	36.1	0	0	NA	1	0	1	M	3	Negative	11/11/2012	NA	0	1	1	3349	112	137.25	169.5	424.25	NA	NA	104	229.5	149	109	91.25	96.5	248.75	403.5	233.25	228.25	300.25	272
2014	S2	3225	3225	Control	2	NA	0	36.7	0	0	NA	0	0	2	M	7	Negative	11/11/2012	NA	0	1	1	3303	76.75	103.75	119.75	746.25	190.5	87	72	158.25	82.5	110.5	75.5	74.5	355.5	474.75	171.25	145.75	200.5	194.25
2014	S2	3225	3225	Control	2	NA	1	36.8	0	0	NA	1	0	1	F	12	Negative	11/11/2012	NA	0	1	1	2910	101	132	151.5	496	109	125	NA	261	NA	NA	101.5	99.5	554.75	604.75	239.75	258.5	463.5	514
2014	S2	3225	3225	Control	2	NA	1	36.7	0	0	NA	1	0	1	F	5	Negative	11/11/2012	NA	0	1	1	3325	72.5	86.5	99.75	284	62.5	73.5	62.5	134	104.5	77.5	65.25	68.25	202	310	153	149	244.5	185
2014	S2	3225	3225	Control	2	NA	1	36.1	0	0	NA	1	0	1	M	53	Negative	11/11/2012	NA	0	3	0	2818	1273.75	126	248	163.25	3503	157.75	8084.75	107	1161.5	7248.25	686.75	213	230.75	219	111.75	407.25	98.75	119
2014	S2	3225	3225	Control	2	NA	1	36.2	0	0	NA	0	0	1	M	15	Negative	11/11/2012	NA	0	2	1	2930	NA	363.5	NA	665.5	NA	172	NA	336	NA	NA	119	128	549	707.25	324.75	365.75	384	350
2014	S2	3225	3225	Control	2	NA	0	37.1	0	0	NA	1	0	1	M	7	Negative	11/11/2012	NA	0	3	1	2980	58	56.25	43.75	67.25	35	42	43	56.25	149.5	81	39	56	575	483.5	68.5	49.5	63.5	69
2014	S2	3225	3225	Control	2	NA	1	36.1	0	0	NA	0	0	1	F	67	Negative	11/11/2012	NA	0	1	1	3328	228.5	173.5	336.5	553.5	185.5	134.5	159.5	370	223.75	NA	296.25	168	382	749.5	302.75	560.75	383.5	350.25
2014	S2	3225	3225	Control	2	NA	1	37	0	0	NA	0	0	2	F	24	Negative	11/11/2012	NA	0	1	1	2724	NA	NA	173	1783.5	NA	NA	NA	202.75	NA	NA	236.75	147	323	1456.25	218	198.25	203.5	199.25
2014	S2	3225	3225	Control	2	NA	1	37.1	0	0	NA	1	1	1	M	17	Negative	11/11/2012	NA	0	1	1	3101	NA	NA	98.75	214.25	NA	64.5	NA	117.75	NA	NA	60.5	NA	185.25	247.5	100	91.5	124.75	118.75
2014	S2	3225	3225	Control	2	NA	1	36.9	0	0	NA	0	0	1	F	6	Negative	11/11/2012	NA	0	1	1	3119	76.5	108.25	113	296.75	NA	111.25	NA	165	NA	NA	72.75	76.5	259.5	328.25	176.5	128.25	180.5	187.75
2014	S2	3225	3225	Control	2	NA	1	36.7	0	0	NA	1	1	1	M	33	Negative	11/11/2012	NA	0	1	1	2967	NA	114.5	142.25	384.75	165	96.5	213.5	222	NA	328	221.5	107.5	349	401	193.25	254.75	300.25	223.75
2014	S2	3225	3225	Control	2	NA	1	35.7	0	0	NA	1	1	1	M	31	Negative	11/11/2012	NA	0	1	1	3059	NA	155.5	NA	521	NA	151	NA	301.25	NA	NA	NA	NA	570.5	525.5	321	605	356.25	321
2014	S2	3225	3225	Control	2	NA	1	36	0	0	NA	1	0	1	M	66	Negative	11/11/2012	NA	0	3	1	2656	1599.5	274.75	211.25	146.25	548	174.25	2976	259	874.25	2012.75	641.5	122	1084.75	706	158	145.5	136.75	131.25
2014	S2	3225	3225	Control	2	NA	1	36.6	0	0	NA	0	0	2	M	39	Negative	11/11/2012	NA	0	1	1	2979	NA	NA	NA	501.25	NA	NA	NA	NA	NA	NA	NA	NA	2343.5	1412.5	263.5	497	364.25	314.5
2014	S2	3225	3225	Control	2	NA	0	37	0	0	NA	1	1	1	M	18	Negative	11/11/2012	NA	0	1	1	3242	153.25	89.75	169	413	NA	78.5	200.75	153.5	119	326	78.75	103	346	384	143	295.5	166	174
2014	S2	3225	3225	Control	2	NA	1	36.9	0	0	NA	0	0	1	F	9	Negative	11/11/2012	NA	0	1	1	3424	NA	130.25	148	394.25	NA	107	NA	228.25	126.5	120.75	108.5	112.5	283.25	423	228.75	234.75	406.25	271.5
2014	S2	3225	3225	Control	2	NA	1	36.8	0	0	NA	1	1	1	M	39	Negative	11/11/2012	NA	0	2	1	3056	NA	213	176.5	495	NA	NA	NA	259	NA	NA	789.75	NA	781	489.5	229	328	257.75	276
2014	S2	3225	3225	Control	2	NA	1	36.5	0	0	NA	1	0	1	F	39	Negative	11/11/2012	NA	0	1	1	3316	3661	118	154.25	3038.5	1181.5	761	1419.25	248.75	767.75	1487.5	1968.5	416	1570.25	1034.75	189.5	616.75	222.5	235
2014	S2	3225	3225	Control	2	NA	1	35.8	0	0	NA	1	0	1	F	48	Negative	11/11/2012	NA	0	1	1	2959	381.75	171.5	3145	829.5	NA	142.25	NA	391.5	NA	NA	1489	292.25	440	1168.25	294.25	907	362.5	312
2014	S2	3225	3225	Control	2	NA	1	37.4	0	0	NA	1	0	1	F	12	Negative	11/11/2012	NA	0	1	1	2833	123.5	124	139.5	291.75	103	100.75	225	151	230.75	1280.5	73.5	127	264.25	393.5	190.5	211	205.25	178
2014	S2	3225	3225	Control	2	NA	1	35.4	0	0	NA	0	0	1	F	50	Negative	11/11/2012	NA	0	3	1	2498	1303	52	220.75	99.5	599.5	51	2071.5	91	242	912	783.5	531.5	368	167.5	80.25	124	75	68
2014	S2	3235	3235	Intervention	2	NA	1	36.5	0	1	NA	0	0	2	F	9	Negative	11/11/2012	NA	0	1	1	3410	67.75	103.5	114	278.75	71.5	82.5	79.75	152.25	78.5	274.5	66.5	73.5	237	408.75	167.5	203.75	207.75	186.25
2014	S2	3235	3235	Intervention	2	NA	1	36.7	0	0	NA	1	0	1	M	8	Negative	11/11/2012	NA	0	1	1	3275	NA	NA	170.5	402	NA	NA	NA	238.5	NA	NA	85	NA	1157.5	1043	228	194.25	303	276.75
2014	S2	3235	3235	Intervention	2	NA	0	36.2	1	NA	NA	1	0	1	F	36	Negative	11/11/2012	NA	0	1	1	2902	NA	151.75	NA	491.25	131.25	99	NA	319	NA	NA	NA	292.5	504.25	665.25	233.5	403.25	287.75	261.5
2014	S2	3235	3235	Intervention	2	NA	0	35.9	1	NA	NA	0	0	3	M	16	Negative	11/11/2012	NA	0	1	1	3425	NA	126.75	247	386.25	443.5	94.25	113.75	175.5	294.25	NA	78	86	184.5	318.25	199	198.5	243.5	219.5
2014	S2	3235	3235	Intervention	1	NA	0	36.2	1	NA	NA	0	0	1	M	32	Negative	11/11/2012	NA	0	1	1	3275	77	97.5	116.5	307	NA	167	81.75	170.75	NA	136.25	98	72	305.5	383	176.25	164	207.25	553.75
2014	S2	3235	3235	Intervention	1	NA	0	36.1	1	NA	NA	0	0	1	F	28	Negative	11/11/2012	NA	0	1	1	3476	64	103	123.25	280.5	60.25	75.25	122	145.5	74.75	116.25	NA	96	449.25	392	150.5	171.25	189.75	180.5
2014	S2	3235	3235	Intervention	1	NA	0	36.2	0	1	NA	0	0	1	M	17	Negative	11/11/2012	NA	0	1	1	3297	75.25	90	102.25	258.5	128.25	111.5	NA	171.5	84.25	125.75	74.5	81.75	167.5	291.75	190	147.5	217.75	168
2014	S2	3235	3235	Intervention	1	NA	0	35.8	1	NA	NA	0	0	1	F	14	Negative	11/11/2012	NA	0	1	1	3049	65	92.5	107	288	66.5	99	68	145.25	86.75	138	74	90.75	420.25	428.5	450	161.25	199.25	189
2014	S2	3235	3235	Intervention	1	NA	0	36	1	NA	NA	0	0	1	M	11	Negative	11/11/2012	NA	0	1	1	3437	47.5	66	68.5	171	93.5	109.75	48	98	50	60.5	49	50	175	226.25	106.25	88	126.75	118
2014	S2	3235	3235	Intervention	2	NA	0	36.2	0	1	NA	0	0	1	F	6	Negative	11/11/2012	NA	0	1	1	3367	79.5	107	113.75	339	73.5	91.25	87.25	162.75	92	77	77	75.75	188.75	320.25	172	225.25	314.5	214
2014	S2	3235	3235	Intervention	2	NA	0	35.6	1	NA	NA	0	1	3	M	33	Negative	11/11/2012	NA	0	1	1	2915	91.25	98	125.5	282	74	90.5	73.75	156	85.75	126	68.25	78.25	172.25	266	162	146.5	213.75	180.25
2014	S2	3235	3235	Intervention	2	42	1	35.5	0	1	NA	0	0	1	M	42	Positive	11/11/2012	Pv	1	1	1	3190	NA	155.75	NA	649.5	1786.25	119.5	883.25	300.75	966	NA	NA	257.5	535.75	967.75	323.75	417.25	364.75	347.25
2014	S2	3235	3235	Intervention	2	NA	0	36.2	0	0	NA	0	1	1	M	15	Negative	11/11/2012	NA	0	1	1	3272	224.75	160.25	334.5	451.5	219.5	158.5	861.5	247.25	600.25	993.5	129	124	773	2099.5	758	236.25	286	279.75
2014	S2	3235	3235	Intervention	2	NA	1	35.7	0	1	NA	1	1	1	M	42	Negative	11/11/2012	NA	0	1	1	3008	421	185	217.75	376.5	1359.25	1274	745.75	214.5	13970.5	15117.75	455.5	128.5	325	464.75	197	209	241	228
2014	S2	3235	3235	Intervention	2	NA	1	36.8	1	NA	NA	0	0	1	F	56	Negative	11/11/2012	NA	0	1	1	3142	NA	134.5	171.5	490.75	103	125.5	NA	233	NA	NA	148	181.5	294.25	418.5	231.5	372.5	309.5	274.5
2014	S2	3235	3235	Intervention	2	NA	0	36.8	1	NA	NA	1	0	1	F	25	Negative	11/11/2012	NA	0	1	1	3081	210	175.25	561	423.75	161.5	132.5	246.25	210.75	185.75	492.5	323.5	116.5	549	593.25	245.25	258.5	290	260.5
2014	S2	3235	3235	Intervention	2	NA	0	37.2	0	0	NA	1	0	1	M	16	Negative	11/11/2012	NA	0	1	1	3112	128.75	226	261	345	1026	108.75	2865.5	253.25	459	1968.25	68.25	72	257	359	184.5	168.75	210.25	205.25
2014	S2	3235	3235	Intervention	2	NA	0	36.5	0	0	NA	1	0	1	F	7	Negative	11/11/2012	NA	0	1	1	3416	101.5	138.75	174	457	94	113	153.5	249.5	120.25	238.75	85.25	92.5	522.5	747.25	237	230	286	302.5
2014	S2	3235	3235	Intervention	2	NA	0	36.4	0	1	NA	0	0	1	M	41	Negative	11/11/2012	NA	0	1	1	3424	NA	NA	NA	NA	NA	NA	NA	140.25	NA	NA	NA	NA	NA	NA	NA	NA	NA	NA
2014	S2	3235	3235	Intervention	2	NA	0	36.8	1	NA	NA	1	0	1	F	33	Negative	11/11/2012	NA	0	1	1	2942	647.75	109.5	1156	340	240.5	83	664.75	197	547.5	619.5	85.75	96	1184.75	964	187.25	214.5	217.75	206.5
2014	S2	3235	3235	Intervention	2	NA	0	35.9	1	NA	NA	0	0	1	F	14	Negative	11/11/2012	NA	0	1	1	3519	82	137.5	129.25	312.5	116.25	96	136	180	150.25	215	71	84.25	541.75	572.25	193.75	242.25	262	220.25
2014	S2	3235	3235	Intervention	2	NA	1	36.3	1	NA	NA	1	1	1	F	31	Negative	11/11/2012	NA	0	1	1	3369	143.5	81.5	84.5	262.5	NA	74.5	NA	134	169.25	334.5	152.5	81.5	203	588.5	127.75	136	142	141
2014	S2	3235	3235	Intervention	2	NA	0	35.6	1	NA	NA	1	0	1	M	35	Negative	11/11/2012	NA	0	1	1	3143	885.75	2791	2155.75	1435.75	436.5	174.5	19129.75	425.75	1948.5	5082.75	869.25	155.5	735	726.25	370.75	444	482.75	409.5
2014	S2	3235	3235	Intervention	2	NA	1	36.1	1	NA	NA	0	0	1	M	21	Negative	11/11/2012	NA	0	1	1	2503	157.5	113.5	131.5	348	827.25	146.5	127	194	564.25	863.25	81.25	74.25	377.75	371	178.5	169.5	241	211.5
2014	S2	3235	3235	Intervention	2	NA	0	35.6	1	NA	NA	0	0	1	M	13	Negative	11/11/2012	NA	0	1	1	2926	173.5	203.5	245.25	534	437.5	201.5	2283.75	302	1513.5	1576	101	136	388	1294.25	327	761.5	379.5	340.5
2014	S2	3235	3235	Intervention	2	NA	1	35.6	0	1	NA	0	0	1	F	29	Negative	11/11/2012	NA	0	1	1	3033	NA	NA	NA	503.75	NA	NA	NA	171.75	NA	NA	NA	83	643.5	527.5	157	NA	188.5	180
2014	S2	3235	3235	Intervention	2	NA	0	37	0	0	NA	1	0	1	F	52	Negative	11/11/2012	NA	0	1	1	3197	NA	NA	NA	542.25	NA	NA	NA	238	NA	NA	NA	NA	NA	NA	NA	NA	304.25	293.75
2014	S2	3235	3235	Intervention	1	NA	0	36.2	0	0	NA	0	0	2	F	41	Negative	11/11/2012	NA	0	1	1	3123	NA	NA	373.5	354.5	296.5	102.5	1227.5	286.5	280.5	1179.5	172.75	96	314.25	449.75	179.5	179.5	217.5	212
2014	S2	3235	3235	Intervention	5	NA	1	36.9	1	NA	NA	0	1	1	M	46	Negative	11/11/2012	NA	0	1	1	3392	NA	117.5	113.5	1940.25	NA	114	15835	171.75	NA	NA	86	77	456	641.25	159.5	185.25	189.25	198
2014	S2	3235	3235	Intervention	1	NA	0	36.1	1	NA	NA	0	0	1	F	14	Negative	11/11/2012	NA	0	2	1	2956	NA	NA	NA	357	3776.75	92.75	172	176.5	358.25	503	108.5	109.5	282.5	326.25	175	NA	233.25	192.5
2014	S2	3235	3235	Intervention	2	NA	0	35.1	1	NA	NA	1	0	2	M	32	Negative	11/11/2012	NA	0	1	1	3002	NA	89.5	NA	592	NA	NA	NA	228.75	NA	NA	NA	66.5	307.75	576	177	182.5	176	170.75
2014	S2	3235	3235	Intervention	2	NA	0	35.2	0	0	NA	1	0	1	F	3	Negative	11/11/2012	NA	0	1	1	3237	105.5	137.5	165.25	463	93	115	113	255.5	135.25	108.75	87.75	93.5	341.75	437.75	247.5	246.75	461.75	297
2014	S2	3235	3235	Intervention	2	NA	1	36.4	1	NA	NA	1	0	1	F	67	Negative	11/11/2012	NA	0	1	1	2905	465.5	7000	194.75	835	745	130	15507.5	333.5	4861.25	14730.5	396.5	169.5	562	956.25	263	331.5	358.25	311.25
2014	S2	3235	3235	Intervention	2	NA	1	36.8	0	1	NA	0	0	1	F	74	Negative	11/11/2012	NA	0	1	1	3084	633	207	1027	954.75	330.5	213.75	NA	175.25	180.5	1330.5	78.5	69.5	193	377	216	194	230.5	173.75
2014	S2	3235	3235	Intervention	2	NA	0	35.7	1	NA	NA	0	0	1	M	29	Negative	11/11/2012	NA	0	1	1	2881	122.25	386	170	259.25	179.25	62	5156.75	123	350	627.75	70.75	79.5	197.75	277.5	107	259.5	140.5	132.5
2014	S2	3235	3235	Intervention	1	NA	0	35.8	1	NA	NA	0	0	1	F	6	Negative	11/11/2012	NA	0	1	1	3295	89	120.25	146.25	406.5	84.5	94.5	119.75	216.75	177.5	97	72	82	280	448.5	213.5	174.25	253	259.25
2014	S2	3235	3235	Intervention	1	NA	0	36	1	NA	NA	0	0	1	M	13	Negative	11/11/2012	NA	0	1	1	3187	51.5	83.5	97	280.25	63.25	110.5	67.75	146.75	68.5	67.5	96	70	193	405.25	167.5	190	163	162.5
2014	S2	3235	3235	Intervention	1	NA	0	36.4	1	1	NA	0	0	1	F	26	Negative	11/11/2012	NA	0	1	1	3169	NA	NA	NA	287	NA	NA	NA	147.75	NA	NA	NA	NA	341.25	446	245.75	NA	187.75	NA
2014	S2	3235	3235	Intervention	1	NA	0	35.3	0	0	NA	0	0	1	F	56	Negative	11/11/2012	NA	0	1	1	3192	NA	109	NA	398.5	NA	NA	NA	158.5	NA	NA	129	78	198.5	304	158.25	158.5	187.75	186
2014	S2	3238	3238	Control	2	NA	0	37.1	0	0	NA	0	0	1	M	10	Negative	8/11/2012	NA	0	1	1	3044	61	81	142	288	53	68.75	69.5	156	68.5	107.75	57.75	59	1037.5	1008	140.5	160.5	276.75	175.25
2014	S2	3238	3238	Control	2	NA	1	36.5	0	0	NA	0	0	1	F	5	Negative	8/11/2012	NA	0	2	1	3242	119.5	159	206.25	485	100	121	116.75	292	155	169.25	91.75	105	352.5	585	298	283.5	329.5	352.75
2014	S2	3238	3238	Control	2	NA	1	36.1	0	0	NA	0	0	1	F	2	Negative	8/11/2012	NA	0	1	1	3200	114.5	165.25	203.75	482.5	117.5	142.5	152	280.75	156.25	142.75	103	107.5	363	821.25	284.5	315.5	474.5	362.5
2014	S2	3238	3238	Control	2	NA	1	36.5	0	0	NA	1	0	1	F	13	Negative	8/11/2012	NA	0	1	1	3510	NA	NA	NA	NA	NA	NA	847.5	NA	283.25	753.25	NA	NA	NA	NA	NA	NA	NA	NA
2014	S2	3238	3238	Control	2	NA	1	37.1	0	0	NA	1	0	1	F	50	Negative	8/11/2012	NA	0	1	1	3334	653.5	NA	1149	NA	5913.75	3479.5	1302.25	NA	2023.5	4860.5	NA	144	NA	NA	NA	989.5	NA	NA
2014	S2	3238	3238	Control	2	NA	0	36.5	0	0	NA	0	0	1	M	6	Negative	8/11/2012	NA	0	1	1	2740	NA	NA	NA	NA	NA	NA	NA	NA	NA	NA	NA	NA	NA	NA	NA	NA	NA	NA
2014	S2	3238	3238	Control	2	NA	1	35.5	0	0	NA	0	0	1	F	15	Positive	8/11/2012	Pv	1	1	1	2497	NA	NA	NA	NA	8942.5	1973.5	149.25	NA	463.5	1190	NA	NA	NA	NA	611.75	NA	NA	NA
2014	S2	3238	3238	Control	2	NA	1	36	0	1	NA	1	0	2	M	12	Negative	8/11/2012	NA	0	1	1	3019	NA	NA	NA	NA	NA	NA	NA	NA	NA	NA	NA	NA	NA	NA	NA	NA	NA	NA
2014	S2	3238	3238	Control	2	NA	0	36.2	0	0	NA	1	0	1	F	30	Negative	8/11/2012	NA	0	2	1	2854	NA	195.5	NA	1798.5	NA	NA	25045.75	403.25	NA	NA	568.75	223.5	380.75	2622.5	NA	670.5	NA	NA
2014	S2	3238	3238	Control	2	NA	0	37.2	0	0	NA	0	0	1	M	13	Negative	8/11/2012	NA	0	1	1	2927	NA	NA	NA	NA	7143.25	1411	2373.25	NA	757	1551	NA	NA	NA	NA	NA	NA	NA	NA
2014	S2	3238	3238	Control	2	NA	0	36.3	0	0	NA	0	0	2	M	18	Negative	8/11/2012	NA	0	1	1	2708	128.25	NA	NA	NA	211.5	NA	194	NA	NA	320.5	NA	NA	NA	NA	NA	NA	NA	NA
2014	S2	3238	3238	Control	2	NA	1	36.9	0	0	NA	1	0	1	F	58	Negative	8/11/2012	NA	0	1	1	2783	1340.25	NA	NA	NA	NA	NA	5081.25	NA	NA	1068.75	NA	NA	NA	NA	NA	NA	NA	NA
2014	S2	3238	3238	Control	2	NA	0	36.4	0	0	NA	0	0	2	F	6	Negative	8/11/2012	NA	0	1	1	3210	NA	NA	NA	NA	1445	308.5	NA	NA	131.25	NA	NA	NA	NA	NA	NA	NA	NA	NA
2014	S2	3238	3238	Control	2	NA	0	36.3	0	0	NA	0	0	1	F	16	Negative	8/11/2012	NA	0	1	1	2543	NA	NA	NA	NA	NA	NA	6718.5	NA	425	660.25	NA	NA	NA	NA	NA	419.5	NA	NA
2014	S2	3238	3238	Control	2	NA	1	35.8	0	0	NA	1	1	1	M	30	Negative	8/11/2012	NA	0	1	1	2218	NA	NA	202	NA	NA	NA	NA	295.25	NA	NA	NA	NA	692.5	1701	NA	NA	NA	NA
2014	S2	3238	3238	Control	2	NA	1	36.7	0	0	NA	1	0	1	F	4	Negative	8/11/2012	NA	0	1	1	3097	193.25	NA	NA	NA	NA	1335.5	NA	NA	455	547.5	NA	NA	623.5	667	NA	NA	NA	NA
2014	S2	3238	3238	Control	2	NA	1	36.6	0	0	NA	1	0	1	F	18	Negative	8/11/2012	NA	0	1	1	2819	260	1089	3501.75	NA	821.25	NA	NA	NA	1692	NA	NA	NA	425.75	6596	NA	281.25	NA	NA
2014	S2	3238	3238	Control	2	NA	0	36.5	0	0	NA	1	0	1	F	31	Negative	8/11/2012	NA	0	1	1	2073	653.25	386.75	NA	1225.5	NA	200.25	NA	NA	1099.5	NA	NA	222	833.25	2571.25	571.25	NA	435.75	NA
2014	S2	3238	3238	Control	2	NA	0	36.7	0	0	NA	1	1	1	M	22	Negative	8/11/2012	NA	0	1	1	1417	NA	359.25	NA	NA	NA	NA	NA	NA	NA	NA	NA	NA	1497.5	1005	NA	2369.5	NA	NA
2014	S2	3238	3238	Control	2	39.92	1	36.1	0	0	NA	1	1	1	M	52	Positive	8/11/2012	Pf	1	1	1	2750	786	NA	NA	NA	1503.25	NA	11825	NA	NA	18455.25	560.75	620.5	NA	1322.75	NA	NA	NA	NA
2014	S2	3238	3238	Control	2	NA	0	36.2	0	0	NA	1	0	1	M	6	Negative	8/11/2012	NA	0	1	1	2670	NA	NA	NA	NA	NA	NA	341.25	NA	68	225.25	NA	NA	NA	NA	NA	NA	NA	NA
2014	S2	3238	3238	Control	2	40.1	0	36.3	0	0	NA	0	0	1	F	NA	Positive	8/11/2012	Pv	1	1	1	3073	NA	NA	NA	NA	NA	NA	2041.25	NA	1800.25	9591.5	NA	NA	NA	NA	NA	NA	NA	NA
2014	S2	3238	3238	Control	2	NA	1	35.7	0	0	NA	1	0	1	M	50	Negative	8/11/2012	NA	0	1	1	2355	1463.75	541.25	282.25	886.5	1379.25	NA	9017.5	NA	486.5	3948	NA	443.25	858.5	NA	NA	240.5	NA	NA
2014	S2	3238	3238	Control	2	NA	1	36.3	0	0	NA	1	1	1	M	50	Negative	8/11/2012	NA	0	1	1	2204	1341.5	395.75	NA	NA	446	NA	370.5	NA	610.75	1410.25	358	323.25	NA	NA	NA	NA	NA	NA
2014	S2	3238	3238	Control	2	NA	0	36.5	0	0	NA	0	0	1	M	5	Negative	8/11/2012	NA	0	1	1	3111	NA	NA	NA	NA	NA	NA	NA	NA	108.75	NA	NA	NA	860.75	720.25	NA	NA	NA	NA
2014	S2	3238	3238	Control	2	NA	1	37.2	0	0	NA	1	0	1	F	50	Negative	8/11/2012	NA	0	1	1	2598	650.5	NA	NA	NA	191.5	NA	1543.5	NA	2256.5	2388	142	NA	304	NA	NA	1587.5	NA	NA
2014	S2	3238	3238	Control	2	NA	0	37.1	0	0	NA	1	0	1	M	9	Negative	8/11/2012	NA	0	1	1	2664	NA	NA	NA	NA	270.5	NA	675.5	NA	1499.25	755.5	NA	NA	NA	NA	NA	NA	NA	NA
2014	S2	3238	3238	Control	2	NA	1	36.3	0	0	NA	1	0	1	M	80	Negative	8/11/2012	NA	0	1	1	2990	708.5	NA	NA	889	1037	NA	1524.5	NA	1316.25	1712.5	1708.75	NA	NA	NA	NA	693.5	NA	NA
2014	S2	3238	3238	Control	2	NA	0	36.6	0	0	NA	1	0	1	F	35	Negative	8/11/2012	NA	0	1	1	3378	1169	NA	NA	NA	2081.5	NA	909.5	NA	1280.75	1118	1485	808.25	NA	NA	NA	NA	NA	NA
2014	S2	3238	3238	Control	2	35.2	1	38.2	0	0	NA	1	0	1	F	12	Positive	8/11/2012	PfPv	2	2	1	2698	NA	484	9568.25	NA	9358	1157.75	21103.5	437.75	12846.75	15652	NA	NA	NA	1027.25	NA	NA	NA	NA
2014	S2	3238	3238	Control	2	NA	1	37	0	0	NA	1	0	1	F	NA	Positive	8/11/2012	Pv	1	1	0	2574	NA	380	NA	1324.25	NA	879.5	NA	NA	NA	22232.5	NA	NA	962.5	NA	NA	NA	NA	NA
2014	S2	3238	3238	Control	2	NA	1	36.3	0	0	NA	1	0	1	F	50	Negative	8/11/2012	NA	0	1	1	2617	4301	NA	1709.75	8771.25	NA	NA	25704.75	NA	22286.5	24944.25	1717.5	1245	NA	NA	NA	3363	NA	NA
2014	S2	3238	3238	Control	2	NA	0	36.8	0	0	NA	1	1	2	F	25	Negative	8/11/2012	NA	0	1	1	2211	422.5	157	344	1616.75	122.75	NA	11343.75	338.5	2910.75	6425.25	152	146	407.5	719	NA	NA	NA	NA
2014	S2	3238	3238	Control	2	NA	0	37.3	1	1	NA	1	1	1	M	31	Negative	8/11/2012	NA	0	1	1	2514	1055.75	269.75	244.75	1176	1092	69.5	11167.75	NA	530.5	2653.5	585.5	180.5	337.75	NA	NA	705	NA	NA
2014	S2	3238	3238	Control	2	NA	1	36.4	0	0	NA	1	0	1	F	40	Negative	8/11/2012	NA	0	1	1	2645	670	NA	NA	1532.5	477	NA	2911	NA	582.5	1364.25	376.25	NA	562	NA	NA	NA	NA	NA
2014	S2	3238	3238	Control	2	NA	0	36.7	0	0	NA	1	0	1	F	50	Negative	8/11/2012	NA	0	1	1	2390	1132.5	NA	NA	2127.5	21414.5	506	23976.5	NA	1164	8823.5	449	215.5	1682.5	1521.25	NA	400.75	NA	NA
2014	S2	3238	3238	Control	2	NA	0	37	0	0	NA	1	0	1	M	10	Negative	8/11/2012	NA	0	1	1	2782	NA	NA	NA	NA	NA	NA	NA	NA	NA	NA	NA	NA	NA	NA	NA	NA	NA	NA
2014	S2	3244	3244	Intervention	2	NA	0	36.2	1	NA	NA	0	0	1	F	70	Negative	8/11/2012	NA	0	1	1	3331	1100.75	NA	NA	NA	1488.75	NA	1230.5	NA	493	731	570.5	264.5	NA	NA	NA	NA	NA	NA
2014	S2	3244	3244	Intervention	2	NA	0	35.8	1	NA	NA	1	0	1	F	5	Negative	8/11/2012	NA	0	1	1	2675	NA	NA	NA	NA	NA	NA	NA	NA	183.5	NA	NA	NA	NA	NA	NA	NA	NA	NA
2014	S2	3244	3244	Intervention	2	NA	0	37	0	NA	NA	1	0	1	F	30	Negative	8/11/2012	NA	0	1	1	2741	NA	398	2469	7373.5	15724.25	1016	21425.25	398	NA	25822	180.5	114.25	295.5	524.25	NA	766.75	NA	310.5
2014	S2	3244	3244	Intervention	2	NA	0	35.9	1	NA	NA	0	0	1	M	10	Negative	8/11/2012	NA	0	1	1	2759	NA	NA	NA	NA	1001.25	NA	NA	NA	447.25	1097	NA	NA	NA	NA	NA	NA	NA	NA
2014	S2	3244	3244	Intervention	2	NA	0	36.4	1	NA	NA	0	1	1	M	25	Negative	8/11/2012	NA	0	2	1	2421	NA	NA	NA	NA	6681	592.25	2685	NA	NA	4027.75	NA	NA	NA	NA	NA	11513	NA	NA
2014	S2	3244	3244	Intervention	2	NA	1	36.1	0	1	NA	0	0	1	M	70	Negative	8/11/2012	NA	0	1	1	2877	NA	NA	NA	NA	NA	NA	NA	NA	NA	NA	NA	123.5	NA	NA	NA	NA	NA	NA
2014	S2	3244	3244	Intervention	2	NA	0	35.8	1	NA	NA	0	1	1	M	32	Negative	8/11/2012	NA	0	1	1	2736	561.5	NA	NA	NA	558.25	85	NA	NA	162.5	992.5	2602.25	436.75	627.5	NA	NA	NA	NA	NA
2014	S2	3244	3244	Intervention	2	NA	0	37	0	1	NA	1	0	1	M	6	Negative	8/11/2012	NA	0	1	1	3229	NA	NA	NA	NA	NA	NA	NA	NA	NA	NA	NA	NA	NA	NA	NA	NA	NA	NA
2014	S2	3244	3244	Intervention	2	NA	0	34.6	0	1	NA	1	1	1	M	40	Negative	8/11/2012	NA	0	1	1	2732	997.5	NA	NA	NA	2020.25	758.5	19199.75	NA	NA	7723.5	1496.75	296	NA	1370.25	942.25	987.5	NA	NA
2014	S2	3244	3244	Intervention	2	NA	0	36	0	0	NA	0	0	1	F	12	Negative	8/11/2012	NA	0	1	1	3099	NA	NA	NA	NA	NA	NA	NA	NA	NA	NA	NA	NA	365.5	NA	NA	NA	NA	NA
2014	S2	3244	3244	Intervention	2	NA	0	36.7	1	NA	NA	1	0	1	F	37	Negative	8/11/2012	NA	0	1	1	2556	634.5	NA	NA	NA	1936	NA	23848	NA	12744.5	15729.75	138.5	NA	NA	NA	NA	622.5	NA	NA
2014	S2	3244	3244	Intervention	2	NA	0	35.8	1	NA	NA	0	0	1	M	18	Negative	8/11/2012	NA	0	1	1	3042	NA	NA	3240	NA	436	NA	1308.25	NA	394	2255	NA	NA	NA	NA	NA	NA	NA	NA
2014	S2	3244	3244	Intervention	2	NA	0	36.7	1	NA	NA	0	0	1	M	13	Negative	8/11/2012	NA	0	2	1	3072	NA	NA	1084.75	NA	NA	NA	NA	NA	NA	NA	NA	NA	NA	NA	NA	NA	NA	NA
2014	S2	3244	3244	Intervention	2	NA	0	33.1	1	NA	NA	1	0	1	F	30	Negative	8/11/2012	NA	0	1	1	2608	190.5	NA	246.25	NA	NA	NA	NA	NA	148	230.75	NA	NA	275.25	NA	NA	NA	NA	NA
2014	S2	3244	3244	Intervention	2	NA	0	36.5	1	NA	NA	0	0	1	F	40	Negative	8/11/2012	NA	0	2	1	2632	823.5	226	NA	NA	3314	380.5	NA	NA	1096.75	2280.5	769	158	NA	NA	NA	487.75	NA	NA
2014	S2	3244	3244	Intervention	2	NA	0	35.8	1	NA	NA	0	0	1	M	2	Negative	8/11/2012	NA	0	1	1	3242	NA	NA	NA	NA	NA	NA	NA	NA	NA	NA	NA	NA	NA	NA	NA	NA	NA	NA
2014	S2	3244	3244	Intervention	2	NA	0	35.8	1	NA	NA	0	0	1	M	18	Negative	8/11/2012	NA	0	1	1	2664	62.75	NA	NA	NA	NA	NA	NA	NA	131	156	NA	NA	NA	NA	NA	NA	NA	NA
2014	S2	3244	3244	Intervention	2	NA	0	36.1	1	NA	NA	0	0	1	F	30	Negative	8/11/2012	NA	0	4	1	3062	1455.75	41.5	91	61.5	3172.25	441.75	1516.25	56	693.75	1386.25	487.75	203	296.75	147.5	56	59.5	47.5	59
2014	S2	3244	3244	Intervention	2	NA	0	36.5	0	1	NA	1	0	1	F	60	Negative	8/11/2012	NA	0	1	1	2595	2439.5	NA	2262	4699.5	10040.75	2051.5	13100.25	NA	7383.75	23211.25	1217.75	NA	1816.75	1356.5	NA	1369.5	NA	NA
2014	S2	3244	3244	Intervention	2	NA	0	36.3	0	1	NA	0	0	1	F	45	Negative	8/11/2012	NA	0	1	1	2309	NA	NA	NA	NA	NA	NA	2349.75	NA	751	1173	389	NA	NA	NA	NA	NA	NA	NA
2014	S2	3244	3244	Intervention	10	NA	0	36.3	0	0	NA	0	0	1	F	9	Negative	8/11/2012	NA	0	1	1	3250	NA	NA	NA	NA	NA	NA	435	NA	NA	384	NA	NA	514.5	NA	NA	NA	NA	NA
2014	S2	3244	3244	Intervention	2	NA	1	37.1	1	NA	NA	0	0	2	F	27	Negative	8/11/2012	NA	0	1	1	2947	NA	NA	NA	NA	567.5	NA	442.25	NA	394	449.25	NA	NA	NA	NA	NA	NA	NA	NA
2014	S2	3244	3244	Intervention	2	NA	1	36.1	1	NA	NA	1	1	1	M	30	Negative	8/11/2012	NA	0	1	1	2737	743.75	NA	NA	420.5	248	NA	1924.25	NA	496	2781	238.75	NA	NA	NA	NA	NA	NA	NA
2014	S2	3244	3244	Intervention	2	NA	0	36.3	0	1	NA	0	0	1	M	5	Negative	8/11/2012	NA	0	1	1	3388	NA	NA	NA	NA	NA	NA	NA	NA	NA	NA	NA	NA	NA	NA	NA	NA	NA	NA
2014	S2	3244	3244	Intervention	2	28.9	1	39.2	1	NA	NA	1	0	1	F	15	Positive	8/11/2012	Pf	1	1	1	3235	9357.5	NA	454	NA	4291.5	1322	NA	NA	4897.25	10360	NA	89.75	NA	NA	NA	NA	NA	NA
2014	S2	3244	3244	Intervention	2	41.3	0	36.2	0	0	NA	1	0	1	F	35	Positive	8/11/2012	Pf	1	1	1	2630	1687.25	15219	NA	978.25	2282	NA	NA	NA	NA	NA	NA	NA	976.25	NA	NA	NA	NA	NA
2014	S2	3244	3244	Intervention	2	NA	0	35.1	0	0	NA	1	0	1	F	11	Negative	8/11/2012	NA	0	1	1	3015	NA	NA	683.5	NA	189.5	NA	885.25	NA	430.75	727.75	NA	NA	NA	NA	NA	NA	NA	NA
2014	S2	3244	3244	Intervention	1	NA	0	34.7	1	NA	NA	0	0	1	M	47	Negative	8/11/2012	NA	0	1	1	2485	NA	869.75	NA	NA	NA	103.25	NA	NA	NA	NA	NA	NA	187.5	2759.75	381.75	355	NA	NA
2014	S2	3244	3244	Intervention	2	NA	0	36.4	1	NA	NA	1	0	1	F	24	Negative	8/11/2012	NA	0	1	1	2569	NA	459.5	865	3268.75	NA	NA	NA	484	NA	NA	NA	NA	NA	9577	NA	NA	NA	NA
2014	S2	3244	3244	Intervention	2	NA	0	36.2	0	NA	NA	1	0	1	F	8	Negative	8/11/2012	NA	0	1	1	3245	NA	NA	NA	NA	69.75	NA	NA	NA	54	NA	NA	NA	259	NA	NA	NA	NA	NA
2014	S2	3244	3244	Intervention	2	NA	0	35.7	0	0	NA	0	0	1	F	50	Negative	8/11/2012	NA	0	1	1	2412	2168.75	NA	7571.75	5405.75	1197.75	NA	20658.5	NA	9723.75	13512.5	1826	607	NA	14368.5	NA	NA	NA	NA
2014	S2	3244	3244	Intervention	NA	NA	1	36.2	0	0	NA	NA	NA	NA	F	60	Negative	8/11/2012	NA	0	1	1	2657	1926.75	NA	NA	NA	NA	NA	8548.5	NA	1702	2440.25	825.5	166	NA	3293.75	NA	2895.25	NA	NA
2014	S2	3244	3244	Intervention	2	NA	0	36.2	0	1	NA	0	1	1	M	35	Negative	8/11/2012	NA	0	1	1	2525	791.75	209.5	1585.5	NA	164.75	114.25	NA	310.25	NA	NA	NA	NA	674	3533	387.25	1426.25	272	284.75
2014	S2	3244	3244	Intervention	2	NA	0	36.7	0	1	NA	0	0	1	M	7	Negative	8/11/2012	NA	0	1	1	3269	NA	NA	NA	NA	93.25	NA	1524.5	NA	1001	1558.75	NA	NA	NA	NA	NA	NA	NA	NA
2014	S2	3244	3244	Intervention	2	NA	1	36	1	NA	NA	0	0	3	M	26	Negative	8/11/2012	NA	0	1	1	2725	182	274.5	907.75	1892.5	1153.5	212.25	12414.25	269.25	5691.75	11998	124	64	NA	663.5	NA	NA	NA	NA
2014	S2	3244	3244	Intervention	2	NA	0	34.2	0	0	NA	0	0	1	F	2	Negative	8/11/2012	NA	0	3	1	3135	27	39	36	47	31	34.5	31.5	44.5	29	46.75	32.75	35	58	111	57	40.5	60.5	48
2014	S2	3244	3244	Intervention	2	NA	0	35.6	0	1	NA	0	0	1	F	29	Negative	8/11/2012	NA	0	1	1	2479	288.5	NA	2797	NA	935.75	NA	1803.5	NA	2002.5	4689.75	190	NA	314	1527.5	NA	NA	NA	NA
2014	S2	3244	3244	Intervention	2	NA	0	33.8	0	1	NA	0	0	1	M	14	Negative	8/11/2012	NA	0	1	1	3167	579.25	NA	NA	NA	1376	810	NA	NA	3597	8268.25	NA	NA	NA	NA	NA	NA	NA	NA
2014	S2	3244	3244	Intervention	2	NA	1	35.6	1	NA	NA	0	0	1	F	14	Positive	8/11/2012	Pf	1	1	1	2690	NA	4011	2077.5	NA	NA	NA	14198	NA	11379.5	20856.5	NA	NA	465.5	NA	NA	NA	NA	NA
2014	S2	3244	3244	Intervention	2	NA	1	34.8	0	0	NA	0	0	1	F	67	Negative	8/11/2012	NA	0	1	1	2477	3506.75	1229	NA	NA	NA	NA	19699	NA	2771	5292	1398	NA	NA	NA	NA	2616	NA	NA
2014	S2	3244	3244	Intervention	2	NA	0	35.2	1	NA	NA	0	0	1	M	48	Negative	8/11/2012	NA	0	1	1	2891	1289	NA	NA	NA	1050.25	750.5	865	NA	670	3895.75	815.5	767.5	776.75	NA	NA	NA	NA	NA
2014	S2	3244	3244	Intervention	2	NA	1	36.1	0	0	NA	0	0	1	F	15	Negative	8/11/2012	NA	0	1	1	2330	94	NA	NA	NA	1719.75	109	178.25	NA	98.5	290.5	NA	90.5	NA	618.75	NA	1106	NA	NA
2014	S2	3244	3244	Intervention	2	NA	0	35.3	0	0	NA	1	0	1	F	63	Negative	8/11/2012	NA	0	3	1	2882	895.5	1037.25	301.25	68	66.5	40	5477	68.5	1229.5	974	1596	4390.75	1522.75	167.5	70.75	344	64	54
2014	S2	3244	3244	Intervention	2	NA	0	36.2	0	0	NA	1	0	1	F	19	Negative	8/11/2012	NA	0	1	1	3217	NA	NA	1578.75	NA	180.5	NA	4070.5	NA	1637	2549.25	NA	NA	NA	NA	NA	NA	NA	NA
2014	S2	3248	3248	Intervention	3	NA	1	39	0	0	NA	1	0	2	M	6	Negative	28/10/2012	NA	0	1	1	3127	NA	NA	NA	NA	NA	NA	NA	NA	NA	NA	NA	NA	311	NA	NA	NA	NA	NA
2014	S2	3248	3248	Intervention	3	NA	0	36	1	NA	NA	1	0	1	M	39	Negative	28/10/2012	NA	0	1	1	2837	801	NA	NA	NA	1359.75	NA	1835.5	NA	1362.75	2803.25	813.25	NA	1668.75	NA	NA	NA	NA	NA
2014	S2	3248	3248	Intervention	3	NA	0	36	0	0	NA	0	0	1	M	12	Negative	28/10/2012	NA	0	1	1	2347	NA	NA	NA	NA	428.5	260.25	NA	NA	NA	NA	NA	359	NA	NA	NA	NA	NA	NA
2014	S2	3248	3248	Intervention	3	NA	0	37	1	NA	NA	0	0	1	M	10	Negative	28/10/2012	NA	0	1	1	3677	NA	NA	NA	NA	NA	NA	NA	NA	1649.25	688.5	NA	NA	NA	NA	NA	NA	NA	NA
2014	S2	3248	3248	Intervention	3	NA	0	37	1	NA	NA	0	0	1	M	12	Negative	28/10/2012	NA	0	1	1	2297	NA	NA	NA	NA	1244.5	NA	555	NA	555.25	849.75	NA	NA	NA	NA	NA	NA	NA	NA
2014	S2	3248	3248	Intervention	3	NA	0	36	0	0	NA	0	0	1	F	25	Negative	28/10/2012	NA	0	1	1	2986	901.25	400.5	851	1186	1641	288.75	6423.25	351	483.75	892	255.75	156	426.5	843.5	328	366.75	449	402.25
2014	S2	3248	3248	Intervention	3	NA	0	36	0	0	NA	1	0	1	M	16	Negative	28/10/2012	NA	0	1	1	2859	313	286	NA	892	201	178.5	453.5	391.75	346.25	602	224	194.75	493.5	905	431	NA	826	615
2014	S2	3248	3248	Intervention	3	NA	0	36	0	0	NA	1	1	1	M	17	Negative	28/10/2012	NA	0	1	1	3162	135.75	182.5	212.5	581	156.25	137.75	125.5	301.5	230	380	114	116	619	802.75	337.75	294.5	409.25	374.5
2014	S2	3248	3248	Intervention	3	NA	0	36	1	NA	NA	0	0	1	M	5	Negative	28/10/2012	NA	0	1	1	3049	82.25	105	130.5	377	178.5	154.75	99.75	174.75	101.25	129.5	79	80.25	228.75	340.75	182.5	189.75	325.5	226.25
2014	S2	3248	3248	Intervention	3	NA	0	36	1	NA	NA	1	1	1	M	29	Negative	28/10/2012	NA	0	1	1	3080	921.25	194.5	242.5	594	177	170.75	2243.25	366	405.25	423.5	123.5	134	698	970.5	334	308	372.5	411.5
2014	S2	3248	3248	Intervention	3	NA	0	36	0	1	NA	1	1	1	M	55	Negative	28/10/2012	NA	0	1	1	2782	447	188.75	237	602	1326	146.5	5329.75	334.75	662	964	310	193.5	477	618.25	331.25	293	403	407.75
2014	S2	3248	3248	Intervention	3	NA	1	37	1	NA	NA	0	0	1	F	100	Negative	28/10/2012	NA	0	1	1	3146	420	226	225.5	893	207.75	168	431.5	275	404	629.5	283.5	128.5	327.5	632	252.25	261	338.5	325.25
2014	S2	3248	3248	Intervention	3	NA	0	36	1	NA	NA	0	0	1	M	11	Negative	28/10/2012	NA	0	1	1	2984	137.5	203	247	698.75	128	155.25	174.25	350	215.25	169	121.5	124	495	786.75	368	334.5	453.25	460
2014	S2	3248	3248	Intervention	3	NA	0	37	1	NA	NA	1	0	1	F	20	Negative	28/10/2012	NA	0	1	1	2722	247.25	164.5	198	541.75	499	205.75	1170	326.75	417.25	679.75	110.75	126	754	846.75	276.5	280.5	429	341
2014	S2	3248	3248	Intervention	3	NA	0	35.7	1	1	NA	1	1	1	M	21	Negative	28/10/2012	NA	0	1	1	3026	179.5	180.25	212.25	615.75	3383.75	168.5	146	298	248.5	436	122.25	112.5	334	550	297.5	266	381.5	372.5
2014	S2	3248	3248	Intervention	3	NA	1	36	0	0	NA	0	1	1	M	18	Negative	28/10/2012	NA	0	1	1	3017	138.5	176.75	212.25	643	2245	389.5	885	324.5	192.75	157.75	127	128.5	330.5	497.5	311	304.75	418	353.25
2014	S2	3248	3248	Intervention	3	NA	0	36	0	0	NA	0	0	1	M	2	Negative	28/10/2012	NA	0	1	1	2850	80.5	108.5	129.5	316.5	210	144	81.75	185.25	106	95.5	85	88.5	173.5	301.5	190.75	175.75	225.5	240
2014	S2	3248	3248	Intervention	3	NA	0	36	0	0	NA	0	0	1	F	36	Negative	28/10/2012	NA	0	1	1	2603	342	223	456	1025.25	210.75	169.5	1166.5	465.5	1029.25	1735	744.5	164.75	617.75	753	378.5	516.5	794	515.5
2014	S2	3248	3248	Intervention	3	NA	1	36	1	NA	NA	1	0	1	M	13	Negative	28/10/2012	NA	0	1	1	2620	177.5	238.5	326.25	988	1505.25	238	312.75	441.25	693.5	1752.5	180.5	174.5	819.75	1494	1427.5	437.5	525.25	546.75
2014	S2	3248	3248	Intervention	3	NA	0	36	1	NA	NA	1	0	1	F	13	Negative	28/10/2012	NA	0	1	1	2863	221.5	169.25	206	543.75	235	145.5	847.5	323.5	539.5	610.25	173.75	159.25	414	577.75	300	308.25	351	409.25
2014	S2	3248	3248	Intervention	3	NA	0	36	0	0	NA	0	0	1	F	55	Negative	28/10/2012	NA	0	1	1	2617	1181	546	2940	5774.25	2634.5	370.25	18710.75	569	2813.5	7270.25	772	297.25	1067	2869.5	582	723.75	401	406.75
2014	S2	3248	3248	Intervention	3	NA	0	37	0	0	NA	0	0	1	M	46	Negative	28/10/2012	NA	0	1	1	2832	273	2337.75	315.25	760.5	1452.5	106	5266.5	209.5	3866.5	5241.75	1394.5	120.5	468	445.5	211.5	330	235.75	221
2014	S2	3248	3248	Intervention	3	NA	0	36.3	1	1	NA	1	1	1	M	31	Negative	28/10/2012	NA	0	1	1	2629	1212.5	1327	1786.25	1264.25	1676	220.75	12796	375	5645.75	6045.75	448.5	161.25	599.5	675.5	288.5	495.5	332.75	306.75
2014	S2	3248	3248	Intervention	3	NA	0	36	0	0	NA	0	0	1	F	3	Negative	28/10/2012	NA	0	1	1	3010	73	95.5	109	264	70	72.75	153.75	148.5	104.5	108	68.75	65.75	147.75	239.5	149.5	130.5	168.75	175.5
2014	S2	3248	3248	Intervention	3	NA	0	36	0	0	NA	1	0	1	F	50	Negative	28/10/2012	NA	0	1	1	2902	765	584.25	189.5	553.5	404.5	136.75	3591.5	340	651.5	868.75	1906.25	760.25	771.75	455.75	266.75	247.75	303.25	323.5
2014	S2	3248	3248	Intervention	3	NA	1	37	0	0	NA	1	0	1	F	32	Negative	28/10/2012	NA	0	5	1	3235	410	198.25	303.5	559.75	152.5	153.5	337	358.5	293.75	405	105.75	117	341.5	618.5	346.5	307	404	407.5
2014	S2	3248	3248	Intervention	3	NA	0	37	1	NA	NA	1	0	3	F	16	Negative	28/10/2012	NA	0	1	1	2879	119.5	161.5	1574.5	609.25	176.5	136.5	225.25	279.25	1496.25	161.5	263.25	151.25	587	2069	436	249.5	335.5	334.5
2014	S2	3248	3248	Intervention	3	NA	0	36	0	0	NA	1	0	1	M	17	Negative	28/10/2012	NA	0	1	1	2918	225.75	180	242.5	657.25	251.5	129.25	1588	293	248.25	325.75	136.75	113.25	441	531.75	310.5	328.25	376.25	345.75
2014	S2	3248	3248	Intervention	3	NA	0	37	0	0	NA	1	0	1	M	12	Negative	28/10/2012	NA	0	1	1	3027	116.5	151.5	199	456	116	123.25	128.5	267.5	158.25	150.75	108.75	103.75	268.25	415.75	288	245.25	354.25	302
2014	S2	3248	3248	Intervention	3	NA	0	35.5	0	0	NA	1	0	1	F	17	Negative	28/10/2012	NA	0	1	1	2808	81	106.5	111.5	306	74.5	85.25	256	153	176	346.5	82.5	140	212.75	373	164	204	206	191.75
2014	S2	3249	3249	Control	3	NA	1	37.2	0	0	NA	1	0	2	F	12	Negative	29/10/2012	NA	0	1	1	2652	1027.25	126	1978.5	475	346	110	3028	219	191.5	294.5	105	222	392	708.75	271	421.25	545.5	314
2014	S2	3249	3249	Control	3	NA	1	36.3	0	0	NA	1	0	1	F	8	Negative	29/10/2012	NA	0	1	1	2826	140	183.25	257.25	680.25	119.5	138.75	163.5	345.5	222	158	137	146.25	546	691	359.5	318	423	425.75
2014	S2	3249	3249	Control	3	NA	1	36.3	0	0	NA	1	0	1	F	9	Negative	29/10/2012	NA	0	2	1	2925	85	119.5	154	395	79	97.25	89.5	214.75	116.5	98.5	78.5	89.5	226.5	378	221	202.25	275.25	269
2014	S2	3249	3249	Control	3	NA	1	37.2	0	0	NA	1	0	1	F	8	Negative	29/10/2012	NA	0	1	1	2852	91	122.25	153.5	391.75	79	101.25	93	207.75	113	201	92.5	91.75	335.75	461.5	228	209.75	263.75	270.5
2014	S2	3249	3249	Control	3	NA	1	36.7	0	0	NA	0	0	1	F	9	Negative	29/10/2012	NA	0	1	1	2451	95.5	116.5	143	368	83.5	99	89.25	209	107	158.5	88.5	86.75	858.25	802.5	219	197	252.25	234.75
2014	S2	3249	3249	Control	3	NA	1	36.5	0	0	NA	1	0	1	M	10	Negative	29/10/2012	NA	0	1	1	2846	98.5	131.25	167.25	439	84.25	103.5	110.25	213.5	122.75	157	95.5	89	221.25	385.5	230.5	215.25	270.5	278
2014	S2	3249	3249	Control	3	NA	1	36.3	0	0	NA	1	0	1	M	25	Negative	29/10/2012	NA	0	1	1	2830	920	319	382.25	948.5	7813.75	266.5	2563	548	1253.75	1784.5	837.25	618.75	857.25	992.25	513.25	576.25	708.5	656.25
2014	S2	3249	3249	Control	3	NA	0	36.4	0	0	NA	0	0	2	F	31	Negative	29/10/2012	NA	0	1	1	3014	112	158	144.5	350.75	1518.5	118.5	131.25	190.5	391.5	308	81	84.75	245.75	362	207.25	230.75	269	242.5
2014	S2	3249	3249	Control	3	NA	1	36.6	0	0	NA	1	0	2	M	6	Negative	29/10/2012	NA	0	3	1	2885	29	35.5	35.5	42	29.25	34.5	37.5	43.5	30	41.5	59.5	44.75	92	83	51	77.25	43	48
2014	S2	3249	3249	Control	3	NA	1	37.2	0	0	NA	1	0	1	M	14	Negative	29/10/2012	NA	0	1	1	3160	118.5	168.5	207.25	557.75	114.5	127.75	144.5	311.25	1227	1892	107.25	114.75	323.5	767.5	557.25	278.75	363	372.75
2014	S2	3249	3249	Control	3	NA	1	37	0	0	NA	1	0	1	M	18	Negative	29/10/2012	NA	0	1	1	2934	175.5	187.5	222.25	578	130.5	150.25	259.75	323	220.5	227.25	122.5	141.5	508	811.5	340.25	333	518.5	429.5
2014	S2	3249	3249	Control	3	NA	1	36.7	0	0	NA	1	0	1	M	3	Negative	29/10/2012	NA	0	2	1	3115	71.25	99	122.5	355.75	90.75	81.25	73	164.75	91.5	133.5	68.5	70.25	191	319	174.5	166.5	239.25	211.5
2014	S2	3249	3249	Control	3	NA	1	37	0	0	NA	1	0	1	M	14	Negative	29/10/2012	NA	0	1	1	2962	144.75	481.5	127.25	341	415.5	321	2462	203	276	1113.5	82.5	84	276.25	378.75	175	148.5	200.75	196.5
2014	S2	3249	3249	Control	3	NA	1	37.2	0	0	NA	1	0	1	M	23	Negative	29/10/2012	NA	0	1	1	2734	557.75	196	152.25	1366.25	4812.5	771	11417.5	406.5	4412.75	6453.75	100.5	91.5	283	493.75	193	179.25	230	237.5
2014	S2	3249	3249	Control	3	NA	1	36.5	0	0	NA	1	0	2	M	22	Negative	29/10/2012	NA	0	1	1	2897	379.75	136	236	423.25	470.75	118	5061	296.5	727	1074.5	264	100	397.75	994.25	236	284.75	286.5	283.75
2014	S2	3249	3249	Control	3	NA	1	36.3	0	0	NA	1	0	2	F	3	Negative	29/10/2012	NA	0	2	1	2460	66	88.5	97	227	59.5	72	99.5	128.5	144.75	106.75	62.5	62.5	138.5	238	133.25	118.5	173	150.75
2014	S2	3249	3249	Control	3	NA	1	36.8	0	0	NA	1	1	1	M	30	Negative	29/10/2012	NA	0	1	1	2801	391	289.5	959	776	3305	168.75	787.75	288.25	916	1424	136	119.75	373	742.5	325	305	466.5	352.25
2014	S2	3249	3249	Control	3	NA	1	36.4	0	0	NA	0	0	1	F	49	Negative	29/10/2012	NA	0	1	1	2789	361.75	582.75	127.5	329	736	109.5	1088.25	195	570	1203.25	1019.5	301	829	379.75	179	924.25	214	223.5
2014	S2	3249	3249	Control	3	NA	1	36.7	0	0	NA	1	1	2	M	28	Negative	29/10/2012	NA	0	1	1	2453	379.25	179.5	24024.5	3866	1580	370.25	29161.25	716	22198.25	27057.25	481	146	470.5	870	352.5	725.5	400	421.25
2014	S2	3249	3249	Control	3	NA	1	36.9	0	0	NA	0	0	1	M	38	Negative	29/10/2012	NA	0	1	1	2857	430.25	193	8407.5	734	834.25	465.5	1790.75	395.25	2227	2170.5	269.5	121.5	658.25	849.5	374.5	475.5	435.75	441
2014	S2	3249	3249	Control	3	NA	1	36.7	0	0	NA	1	1	1	M	22	Negative	29/10/2012	NA	0	2	1	2704	119	158.75	182	412.5	9148	1804	2631	231.5	1217.75	1444	99.5	120.75	259.75	487.5	305	229.5	274.75	292.25
2014	S2	3249	3249	Control	3	NA	1	37	0	0	NA	1	0	1	F	38	Negative	29/10/2012	NA	0	1	1	2859	92.5	126.5	273.5	355.75	143.5	63.5	1684.75	131.5	211	344.5	67	77.5	502.5	531.25	241.75	180.5	179.25	170.75
2014	S2	3249	3249	Control	3	NA	1	36.7	0	0	NA	1	1	1	M	18	Negative	29/10/2012	NA	0	1	1	2787	115	146.5	215.25	918.5	367	269.5	5979.25	250.25	399	653.75	275	128.75	347.5	828.75	244	324.5	290.75	298.5
2014	S2	3249	3249	Control	3	NA	1	36.5	0	0	NA	1	0	2	F	13	Negative	29/10/2012	NA	0	1	1	2594	82.5	103.75	156	371.5	214.5	158.75	848.25	232.5	1218.5	1896.25	183.25	89.5	372.5	1606.25	733.75	595.25	234.5	215.25
2014	S2	3249	3249	Control	3	NA	1	37.1	0	0	NA	1	0	2	F	30	Negative	29/10/2012	NA	0	1	1	2818	73.25	135	218	501.25	1048.25	198.75	203.5	133.75	145	274.75	97	76.75	271.5	387.25	164.5	125	155.25	141.5
2014	S2	3249	3249	Control	3	NA	1	36.8	0	0	NA	1	0	2	F	8	Negative	29/10/2012	NA	0	2	1	2862	553.5	107	137	336.5	86.25	99.75	969.5	186.5	545	118.5	139	117.25	232.25	370.75	204.75	238.5	242.5	245.5
2014	S2	3249	3249	Control	3	NA	1	36.9	0	0	NA	1	0	1	M	5	Negative	29/10/2012	NA	0	1	1	2779	64.25	82	120	238.5	57	71	79.75	133	82.5	90.5	66.75	68.5	133.5	214.25	143.5	134.75	178	164.75
2014	S2	3249	3249	Control	3	NA	1	36.9	0	0	NA	1	0	1	F	48	Negative	29/10/2012	NA	0	1	1	2615	1214.25	2502.5	150.5	485.5	157.25	111.5	11450.75	232	1615.25	5558.5	1038.75	152.5	708	428.5	218.5	484.5	275	281.5
2014	S2	3249	3249	Control	3	NA	1	37	0	0	NA	1	1	1	M	22	Negative	29/10/2012	NA	0	2	1	2778	244	264.75	278.5	541	824	125.5	513	236.25	2390	2629	112.25	175.75	462.75	612.5	235	593.5	297	276
2014	S2	3249	3249	Control	3	NA	1	36.8	0	0	NA	0	0	1	F	13	Negative	29/10/2012	NA	0	1	1	2970	95.25	121	140.25	378	97	98	159	224	175	488.75	158	111.5	229	379.75	228.75	305	249	257.25
2014	S2	3249	3249	Control	3	40.72	0	36.3	0	0	NA	1	0	1	M	7	Positive	29/10/2012	Pv	1	1	1	2980	83.25	117.5	135.75	318.5	2059.25	391.5	210.75	185	518.25	189.5	81.25	84.5	238	689.5	664.25	184.5	249.5	286.5
2014	S2	3249	3249	Control	3	NA	0	36.5	0	0	NA	1	0	1	M	5	Negative	29/10/2012	NA	0	1	1	2943	55.75	71.5	81	214.5	61.25	61	59.5	136.75	128	258.5	53.5	56	110.5	397	135	104	144	142.5
2014	S2	3249	3249	Control	3	NA	1	36.5	0	0	NA	1	0	1	M	30	Negative	29/10/2012	NA	0	2	1	2729	217.75	227	362.5	837.5	9083	174	1316	370.75	1872.5	5879.75	389.5	151.5	511.5	1621.5	515.75	332.5	403	317.75
2014	S2	3249	3249	Control	3	NA	0	36.5	0	0	NA	0	0	1	F	20	Negative	29/10/2012	NA	0	1	1	2882	127.5	386	771.75	599.5	4368.5	666.25	1299	247.75	614	2119.25	118	125	289.5	482.75	247.5	272.75	338.75	330.75
2014	S2	3249	3249	Control	3	NA	0	36.5	0	0	NA	1	0	1	F	7	Negative	29/10/2012	NA	0	1	1	2876	66.5	87.5	121	285.75	80.5	79.5	69	143.5	78.25	138.25	66.5	65.75	332.5	345.5	159.5	155.5	202	197
2014	S2	3249	3249	Control	3	NA	1	37.5	0	0	NA	1	0	1	F	13	Negative	29/10/2012	NA	0	1	1	2626	905.75	125.5	169.25	431.5	119.75	107.5	1066.5	237.25	158.5	620.75	91.75	101.5	540.75	661.5	243	249.5	325	313.5
2014	S2	3249	3249	Control	3	NA	1	36.7	0	0	NA	1	1	1	M	27	Negative	29/10/2012	NA	0	1	1	2617	250.5	222	1018.25	634.75	7359	397.5	509.5	270.5	930.5	2286.5	1560.5	119.5	690	462.25	280.5	283.5	341.75	380.25
2014	S2	3249	3249	Control	3	NA	1	36.8	0	0	NA	1	1	1	M	14	Negative	29/10/2012	NA	0	2	1	2854	101.25	132.5	187.75	500.5	488.5	309	2293	250.5	497.5	657.5	93.5	107.5	727	760	239.5	237	320	299.75
2014	S2	3249	3249	Control	3	NA	1	37.2	0	0	NA	1	1	1	M	26	Negative	29/10/2012	NA	0	1	1	2384	211.5	105.25	910	743.25	4432.5	176.5	3176.25	152	1647	2479	102	87.5	275.25	431.25	169.75	494.75	214.25	230
2014	S2	3249	3249	Control	3	NA	1	37	0	0	NA	1	1	1	M	31	Negative	29/10/2012	NA	0	1	1	2548	1484.75	314.5	311	492	354.25	149.5	26536.5	344.5	4496.5	4654.5	1828	293	545	720.5	275.75	2025.25	406.5	382.5
2014	S2	3249	3249	Control	3	40.3	1	36.7	0	0	NA	1	0	1	M	11	Positive	29/10/2012	Pv	1	1	1	2778	149.25	132	402	405.5	3410	701	1332.5	247.25	927.5	1972	101	114.25	311	958.5	771	244.75	320.5	276.5
2014	S2	3250	3250	Control	5	NA	0	36.1	0	0	NA	0	0	1	F	6	Negative	29/10/2012	NA	0	1	1	2871	57	69.5	79.75	222	97.5	59.5	316	107.5	80.5	246.5	50.25	52.5	259.25	288	122.5	103	155	133.5
2014	S2	3250	3250	Control	5	NA	0	36	0	0	NA	0	0	1	F	26	Negative	29/10/2012	NA	0	1	1	2516	1814	585.25	2786	1235.75	5558.25	782.5	14249.5	376.5	5746.75	15838	879	297.5	731.75	2492	489.5	941.75	305	318
2014	S2	3250	3250	Control	5	NA	1	36.5	0	0	NA	0	0	1	F	60	Negative	29/10/2012	NA	0	1	1	2587	4616.25	2054	3548	2199.5	20869	7040.25	19257.25	370	10824.25	23962	305.25	208	676.75	1258	298.25	1532	346.25	334.75
2014	S2	3250	3250	Control	5	NA	0	36.5	0	0	NA	1	1	1	M	30	Negative	29/10/2012	NA	0	1	1	2611	1728	129	482	953.75	4816.5	421	1302.75	167	950	5027	2421	219.5	1205.5	846.5	140.5	982.5	179.25	167.5
2014	S2	3250	3250	Control	5	38.6	0	36.1	0	0	NA	1	0	1	M	3	Positive	29/10/2012	Pv	1	1	1	2943	87	90	105.75	346.5	185	139.25	84.25	143.75	108.5	210.25	88.5	87.25	205.5	366.5	156.75	160.25	198	176.25
2014	S2	3250	3250	Control	5	NA	0	36.7	0	0	NA	1	1	1	M	20	Negative	29/10/2012	NA	0	1	1	2549	1949.5	93.5	880.25	295	9400.75	127	4775	184.5	1521	1832	90.75	164.5	327.5	580.25	162.75	316.5	180.5	170
2014	S2	3250	3250	Control	5	NA	0	36.5	0	0	NA	1	0	1	F	24	Negative	29/10/2012	NA	0	1	1	2865	189	343.75	985	288	365	80	697.5	131.5	1790.5	1417.25	563	332.25	341	261.25	136	331.25	176	166.5
2014	S2	3250	3250	Control	5	42.8	1	36.5	0	0	NA	1	0	1	F	10	Positive	29/10/2012	Pv	1	1	1	2825	311.5	271	259.75	515.5	3681.5	167.5	1264.5	292.75	245	1380.5	106	104.5	297.75	565.25	401	251.25	355.75	353
2014	S2	3250	3250	Control	5	NA	0	36	0	0	NA	1	0	1	F	40	Negative	29/10/2012	NA	0	1	1	3178	176.5	83.5	100.5	239.5	372.75	476.5	3295.75	162.25	266.25	331	429	138.75	434.25	305.75	131.25	230.25	166	159.75
2014	S2	3250	3250	Control	5	NA	0	36.3	0	0	NA	1	0	1	F	18	Negative	29/10/2012	NA	0	1	1	3055	86.5	110	408.5	333	157	131	444.5	199	96.5	97.75	89.25	189.5	232.25	345.5	199	396.5	275	210.5
2014	S2	3250	3250	Control	5	NA	0	36.3	0	0	NA	0	0	1	M	8	Negative	29/10/2012	NA	0	1	1	3083	62	76.5	94.5	251.5	83	75	63.5	130.5	64	62.5	59	62.5	212	333.25	237.5	171.25	184.75	162.75
[truncated: 6,439 more rows]
