# Supplementary material for: Serological markers to measure recent changes in malaria at population level in Cambodia
Source: Malar J. 2016 Nov 4;15:529. doi: 10.1186/s12936-016-1576-z (PMC5096337; doi:10.1186/s12936-016-1576-z)
Supplement: Supplementary file 8 — Additional file 8. Incidence rate ratios and p values estimated to indicate difference between the Ab intensity (ln(MFI)) and the levels of exposure per age group (6–5 and 16–50 years). Significant differences between the different levels of exposure (High-, Medium-, Low prevalence) were seen for all specific Ags (p<0.00025). The incidence rate ratios (IRR) confirm that the MFI value decline together with the PCR prevalence in the villages and rise with age. Incidence Rate Ratio that indicates for how much (if > 1) or less (if < 1) the covariates decline with PCR prevalence level or rise with an increasing age. This is performed in respect to the reference category and LCI and UCI representing the lower and upper 95% confidence intervals based on the total sample size of n = 6,499 individuals from 98 villages. [file 12936_2016_1576_MOESM8_ESM.xlsx]

## Sheet: Sheet1
		Plasmodium falciparum			Plasmodium vivax			Anopheles gambiae salivary proteins
Species	Variables	level	IRR [LCI - UCI]	p-value	Species	IRR [LCI - UCI]	p-value	Species	IRR [LCI - UCI]	p-value
CSP	PCR prev.	High	reference	< 0.0025	PvVK210.CSP	reference	< 0.0025	SALIV.1	reference	< 0.0025
		Medium	0.784 [0.629 - 0.977]			0.851 [0.706 - 1.026]			0.870 [0.646 - 1.172]
		Low	0.685 [0.562 - 0.835]			0.809 [0.683 - 0.957]			0.804 [0.626 - 1.051]
	Age	2-5	reference			reference			reference
		6-15	1.444 [1.325 - 1.574]			1.208 [1.118 - 1.307]			1.214 [1.155 - 1.276]
		16-50	5.547 [5.115 - 6.016]			3.705 [3.442 - 3.988]			1.359 [1.296 - 1.425]
Pf13	PCR prev.	High	reference	< 0.0025	PvVK247.CSP	reference	< 0.0025	SALIV.2	reference	< 0.0025
		Medium	0.812 [0.653 - 1.009]			0.812 [0.691 - 0.953]			0.875 [0.644 - 1.187]
		Low	0.710 [0.584 - 0.864]			0.768 [0.664 - 0.887]			0.802 [0.609 - 1.056]
	Age	2-5	reference			reference			reference
		6-15	1.473 [1.390 - 1.562]			1.229 [1.154 - 1.308]			1.224 [1.165 - 1.287]
		16-50	2.370 [2.243 - 2.504]			2.433 [ 2.294 - 2.581]			1.385 [1.322 - 1.452]
STARP.R	PCR prev.	High	reference	< 0.0025	PvCSP	reference	< 0.0025
		Medium	0.702 [0.552 - 0.892]			0.887 [0.746 - 1.056]
		Low	0.622 [0.501 - 0.773]			0.796 [0.680 - 0.930]
	Age	2-5	reference			reference
		6-15	1.384 [1.283 - 1.493]			1.439 [1.360 - 1.523]
		16-50	2.386 [2.222 - 2.563]			2.048 [1.942 - 2.160]
SALSA2	PCR prev.	High	reference	< 0.0025	PvAMA1	reference	< 0.0025
		Medium	0.671 [0.511 - 0.881]			0.933 [0.754 - 1.154]
		Low	0.576 [0.451 - 0.736			0.774 [0.639 - 1.507]
	Age	2-5	reference			reference
		6-15	1.650 [1.493 - 1.823]			1.413 [1.324 - 1.507]
		16-50	3.857 [3.508 - 4.239]			1.955 [1.839 - 2.078]
SR11.1	PCR prev.	High	reference	< 0.0025	PvEBP	reference	< 0.0025
		Medium	0.859 [0.650 - 1.135]			0.733 [0.524 - 1.027]
		Low	0.713 [0.555 - 0.917]			0.544 [0.402 - 0.736]
	Age	2-5	reference			reference
		6-15	1.349 [1.259 - 1.446]			3.044 [2.676 - 3.463]
		16-50	2.143 [2.008 -2.288]			10.982 [9.723 - 12.405]
LSA1.41	PCR prev.	High	reference	< 0.0025	PvDBP	reference	< 0.0025
		Medium	0.801 [0.606 - 1.058]			0.889 [0.725 - 1.090]
		Low	0.654 [0.508 - 0.840]			0.768 [0.639 - 0.922]
	Age	2-5	reference			reference
		6-15	2.495 [2.208 - 2.818]			1.447 [1.346 - 1.555]
		16-50	7.547 [6.725 - 8.470]			1.941 [1.813 - 2.078]
LSA1.J	PCR prev.	High	reference	< 0.0025	Pv.MSP1.19	reference	< 0.0025
		Medium	0.809 [0.656 -0.998]			0.848 [0.666 - 1.078]
		Low	0.762 [0.631 - 0.920]			0.751 [0.605 - 0.934]
	Age	2-5	reference			reference
		6-15	1.454 [1.351 - 1.564]			1.229 [1.165 - 1.296]
		16-50	1.875 [1.750 - 2.009]			1.514 [1.440 - 1.593]
LSA3.RE	PCR prev.	High	reference	< 0.0025
		Medium	0.678 [0.474 - 0.971]
		Low	0.472 [0.342 - 0.971]
	Age	2-5	reference
		6-15	2.877 [2.528 - 3.273]
		16-50	16.062 [14.214 - 18.151]
Pf.MSP1.19	PCR prev.	High	reference	< 0.0025
		Medium	0.851 [0.664 - 1.089]
		Low	0.769 [0.615 - 0.961]
	Age	2-5	reference
		6-15	1.281 [1.217 - 1.348]
		16-50	1.651 [1.573 - 1.732]
GLURP	PCR prev.	High	reference	< 0.0025
		Medium	0.767 [0.572 - 1.028]
		Low	0.549 [0.422 - 0.715]
	Age	2-5	reference
		6-15	2.396 [2.143 - 2.679]
		16-50	8.941 [8.046 - 9.935]
Pf.GLURP.R2	PCR prev.	High	reference	< 0.0025
		Medium	0.672 [0.497 - 0.908]
		Low	0.474 [0.361 - 0.621]
	Age	2-5	reference
		6-15	2.702 [2.412 - 3.027]
		16-50	13.094 [11.765 - 14.577]
IRR is an indicator for the Ab-level ratio
IRR = Incidence Rate Ratio that indicates for how much (if > 1) or less (if < 1) the covariates decline with PCR prevalence level or rise with an increasing age.
This is performed in respect to the reference category and LCI and UCI representing the lower and upper 95% confidence intervals based on the total sample size of n = 6,499 individuals from 98 villages.
P-value < 0.0025, Bonferroni correction for 20 different tests
Best model for each Ag (model 3): ln(MFI) ~ PCR prev. + age category + (1|Survey/Cluster) (Cluster within Survey as random effect).
